# Supplementary material for: Visible light-driven dearomative ring expansion of (aza)arenes to access dihydrofuran-based polycyclic compounds
Source: Royal Society of Chemistry journal article supplement (doi:10.1039/d4sc00748d), 2024-01-01
Supplement: d4sc00748d1.pdf [file d4sc00748d1.pdf]

# Supporting Information

## Visible Light-Driven Dearomative Ring Expansion of (Aza)arenes to Access Dihydrofuran-based Polycyclic Compounds

Linghong Zhang,<sup>1</sup> Mengdi You,<sup>2</sup> Xu Ban,<sup>2</sup> Xiaowei Zhao,<sup>1</sup> Yanli Yin,<sup>2</sup> Shanshan Cao,<sup>2,\*</sup> and

Zhiyong Jiang<sup>1,2,\*</sup>

<sup>1</sup>*Key Laboratory of Natural Medicine and Immuno-Engineering of Henan Province, Henan University, Kaifeng, Henan, P. R. China 475004*

<sup>2</sup>*School of Chemistry and Chemical Engineering, Henan Normal University; Pingyuan Laboratory, Xinxiang, Henan, P. R. China 453007*

*\*E-mail: caoshanshan@htu.edu.cn; jiangzhiyong@htu.edu.cn*

---

## Table of Contents

|                                                                        |           |
|------------------------------------------------------------------------|-----------|
| 1. General information                                                 | S3-S4     |
| 2. Synthetic procedures for starting materials                         | S5-S8     |
| 3. General experimental procedures                                     | S9-S10    |
| 4. Experimental equipment                                              | S11-S13   |
| 5. Mechanism studies                                                   | S14-S16   |
| 6. DFT calculation                                                     | S17-S48   |
| 7. The structural determination of <b>2za</b> and <b>2zd</b>           | S49-S53   |
| 8. X-Ray crystallographic data of <b>2c</b> , <b>2za</b> and <b>6b</b> | S54-S76   |
| 9. Characterization of some starting substrates                        | S77-S88   |
| 10. Characterization of product                                        | S89-S103  |
| 11. Copies of NMR spectra                                              | S104-S237 |
| 12. References                                                         | S238      |

## 1. General information

### (1) General procedures and methods

Experiments involving moisture and/or air sensitive components were performed under a positive pressure of argon in oven-dried glassware equipped with a rubber septum inlet. Dried solvents and liquid reagents were transferred by oven-dried syringes or hypodermic syringe cooled to ambient temperature in a desiccator. Moisture in non-volatile reagents/compounds was removed in high *vacuo* by means of an oil pump and subsequent purging with nitrogen. Solvents were removed *in vacuo* under ~30 mmHg and heated with a water bath at 30–35 °C using rotary evaporator with aspirator. The condenser was cooled with running water at 0 °C. All experiments were monitored by analytical thin layer chromatography (TLC). TLC was performed on pre-coated plates, 60 F<sub>254</sub>. After elution, plate was visualized under UV illumination at 254 nm for UV active material. Further visualization was achieved by staining Ce(SO<sub>4</sub>)<sub>2</sub> and phosphomolybdic acid solution. For those using the aqueous stains, the TLC plates were heated on a hot plate.

Columns for flash chromatography (FC) contained *silica gel* 200–300 mesh. Columns were packed as slurry of *silica gel* in petroleum ether and equilibrated solution using the appropriate solvent system. The elution was assisted by applying pressure of about 2 atm with an air pump.

### (2) Instrumentations

Proton nuclear magnetic resonance (<sup>1</sup>H NMR), carbon NMR (<sup>13</sup>C NMR), and fluorine NMR (<sup>19</sup>F NMR) were recorded in CDCl<sub>3</sub> otherwise stated. Chemical shifts are reported in parts per million (ppm), using the residual solvent signal as an internal standard: CDCl<sub>3</sub> (<sup>1</sup>H NMR: δ 7.26, singlet; <sup>13</sup>C NMR: δ 77.0, triplet). Multiplicities were given as: *s* (singlet), *d* (doublet), *t* (triplet), *q* (quartet), *quintet*, *m* (multiplets), *dd* (doublet of doublets), *dt* (doublet of triplets), and *br* (broad). Coupling constants (*J*) were recorded in Hertz (Hz). The number of proton atoms (*n*) for a given resonance was indicated by *n*H. The number of carbon atoms (*n*) for a given resonance was indicated by *n*C. HRMS (Analyzer: TOF) was reported in units of mass of charge ratio (*m/z*). Mass samples were dissolved in CH<sub>3</sub>CN (HPLC Grade) unless otherwise stated. Melting points were determined on a melting point apparatus.

### (3) Materials

Starting materials were purchased commercially from J&K, Adamas, Energy Chemical, Sigma-

Aldrich, Alfa Aesar, Acros Organics, and other commercial suppliers with reagent grade quality. They were used without further purification unless specified. All solvents used, mainly petroleum ether (PE) and ethyl acetate (EtOAc) were distilled. Anhydrous dichloromethane (DCM) was freshly distilled from  $\text{CaH}_2$  and stored under  $\text{N}_2$  atmosphere. THF,  $\text{Et}_2\text{O}$  and toluene were freshly distilled from sodium/benzophenone before use. All synthesized compounds were stored in a  $-20\text{ }^\circ\text{C}$  freezer.

## 2. Synthetic procedures for starting materials.

### (1) Synthesis of 1a-zf, 1zk, 3a-e and 5a-f<sup>10</sup>

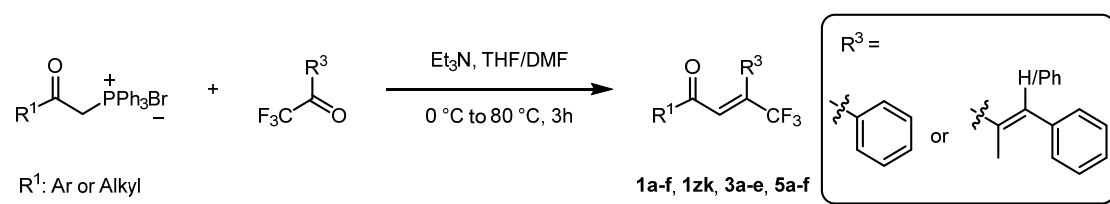

To a cooled solution (0 °C) of (benzoylmethyl)triphenylphosphonium bromide (7.5 mmol) and Et<sub>3</sub>N (7.5 mmol) in THF (20.0 mL) was added trifluoromethyl ketone (7.5 mmol). The mixture was allowed to warm to room temperature and stirred for 15 min. Then it was heat to 80 °C for 3 h with the reaction progress monitored by TLC. After the reaction was completed, it was quenched with saturated NH<sub>4</sub>Cl (aq.), extracted with EA. The organic phase was dried with Na<sub>2</sub>SO<sub>4</sub> and concentrated under reduced pressure. The residue was purified by column chromatography to offer the corresponding *E*-β-CF<sub>3</sub>-chalcones. See previously reported methods for the synthesis of trifluoromethyl aryl ketones.<sup>11</sup>

### (2) Synthesis of 1zg, 1zh, 1zi<sup>12</sup>

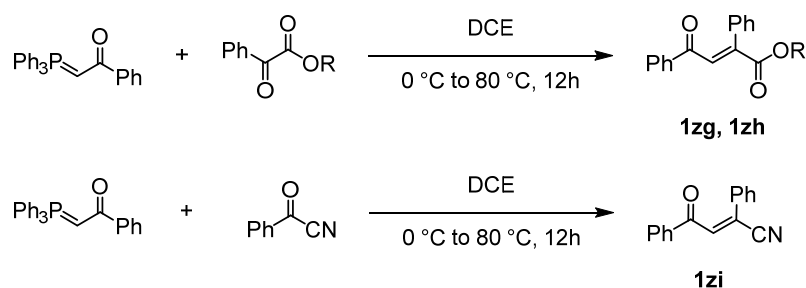

To a 20 mL vial in air containing a magnetic stir bar, ethyl benzoylformate (5.00 mmol, 1.00 equiv), (phenacylidene)triphenylphosphorane (6.00 mmol, 1.20 equiv), and 10 mL DCE were added and heated at 80 °C for 24 h. The vial was cooled to room temperature, and the contents of the vial were filtered through a plug of silica. The solid that remained on the silica was washed with ether. The filtrate was concentrated under vacuum and the crude product was purified by automated silica gel chromatography, eluting with a mixture of ethyl acetate and hexanes (gradient 0:100 → 20:80 EtOAc:Hexanes).

**(3) Synthesis of starting materials 1zj<sup>13</sup>**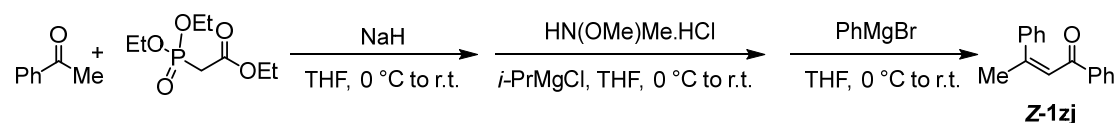

Triethyl-2-phosphonopropionate (1.2 equiv.) was slowly added towards a stirring suspension of NaH (60% in mineral oil, 1.2 equiv.) in THF at 0 °C. After 30 min, acetophenone (1.0 equiv.) was added dropwise and the mixture was allowed to stir over-night at room temperature. Thereafter, the mixture was quenched with NH<sub>4</sub>Cl and extracted with Et<sub>2</sub>O (3x). The combined organic phases were washed with brine, dried over Na<sub>2</sub>SO<sub>4</sub> and evaporated in vacuo to dryness to give the crude. The crude was purified by column chromatography (pentane/Et<sub>2</sub>O, 20:1) to obtain the product as an *E/Z* mixture, which was used in the next step without removal of the undesired configurational isomer. *i*-PrMgCl (3.0M in THF, 4.0 equiv.) was slowly added towards a stirring solution of  $\alpha$ ,  $\beta$ -unsaturated ester (1.0 equiv.) and HN(OMe)Me.HCl (2.0 equiv.) in THF at 0 °C over a time period of 30 min. The reaction mixture was allowed to stir at room temperature and was quenched after 1 h with NH<sub>4</sub>Cl followed by extraction with Et<sub>2</sub>O (3x). The combined organic phases were washed with brine, dried over Na<sub>2</sub>SO<sub>4</sub> and evaporated in vacuo to dryness to give the crude. The crude was purified by column chromatography (pentane/Et<sub>2</sub>O, 3:1) wherein the undesired configurational isomer was separated from the mixture. Suitable Grignard reagent (PhMgBr) (1.1 equiv.) was added dropwise to a stirring solution of Weinreb amide (1.0 equiv.) in THF at 0 °C. The reaction mixture was allowed to stir at room temperature and was quenched after 1 h with NH<sub>4</sub>Cl followed by extraction with Et<sub>2</sub>O (3x). The combined organic phases were washed with brine, dried over Na<sub>2</sub>SO<sub>4</sub> and evaporated in vacuo to dryness to give the crude. The *Z/E* ratio of the product was determined to be 1:1 through crude NMR analysis. Through TLC and NMR analysis, the R<sub>f</sub> value for the *Z*- $\alpha,\beta$ -unsaturated ketone. was found to be 0.6, while the R<sub>f</sub> value for the *E*- $\alpha,\beta$ -unsaturated ketone. was 0.5. The crude was purified by column chromatography (pentane/Et<sub>2</sub>O, 100:0→50:1→25:1) to yield the desired *Z*- $\alpha,\beta$ -unsaturated ketone.

**(4) Synthesis of 1zi and 1zm<sup>14</sup>**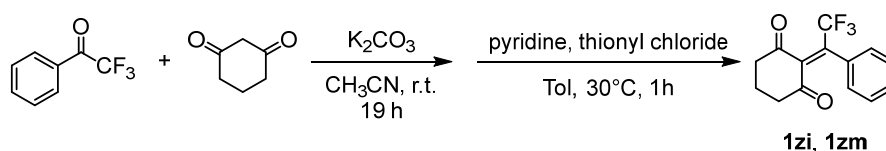

To a solution of 2,2,2-trifluoro-1-phenyl-ethanone (5 mmol, 1.0 equiv.) in acetonitrile (50.0 mL) was added cyclohexanedione derivative (5 mmol, 1.0 equiv.) and potassium carbonate (1.0 equiv.) at room temperature. The reaction was stirred for 19 h at room temperature, then reaction mass was filtered and concentrated under reduced pressure to get crude adduct. This crude adduct (1.0 equiv.) was suspended in toluene (80.0 mL) and pyridine (3.0 equiv.). To this reaction mixture thionyl chloride (1.3 equiv.) was added dropwise maintaining temperature below 30 °C. The reaction was stirred 1 h at room temperature. After completion of the reaction the reaction was quenched with cold water and layers were separated. The combined organic phases were washed with brine, dried over Na<sub>2</sub>SO<sub>4</sub> and evaporated in vacuo to dryness to give the crude. The crude was purified by column chromatography (pentane/Et<sub>2</sub>O, 95:5) to yield the desired  $\alpha,\beta$ -unsaturated ketone.

### (5) Synthesis of **1n**.<sup>13</sup>

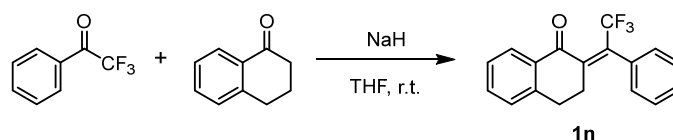

3,4-Dihydronaphthalen-1(2H)-one (1.2 equiv.) and 2,2,2-trifluoro-1-phenylethan-1-one (1.0 equiv.) were stirred in THF at room temperature and a solution of NaH (1.2 equiv.) in THF was added after which the mixture was stirred overnight. Thereafter, the mixture was carefully quenched with HCl (4M) until neutral pH was reached. The mixture was concentrated and dissolved in DCM. The organic phase was washed with NaHCO<sub>3</sub>, washed with brine, dried over Na<sub>2</sub>SO<sub>4</sub>, and evaporated in vacuo to dryness to give the crude. The crude was purified by column chromatography (pentane/Et<sub>2</sub>O, 95:5) to yield **1n**.

### (6) Synthesis of **1i-m**

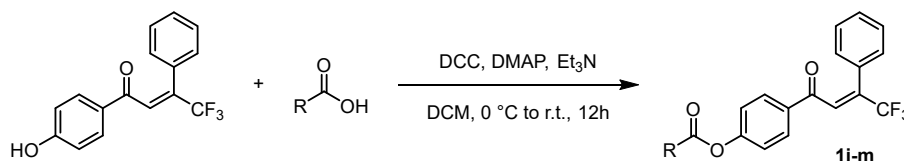

To a cooled solution (0 °C) of the ketones (1.0 mmol) in DCM (5 mL) was added acid (1.0 mmol), DMAP (0.10 mmol) and DCC (1.0 mmol). The mixture was degassed and back-filled with argon (3x). Then it was stirred at 0 °C for 1 h and allowed to warm to room temperature and stirred overnight with the reaction progress monitored by TLC. After the reaction was completed, the solution was washed with water, and brine, dried over Na<sub>2</sub>SO<sub>4</sub> and evaporated.

The product corresponding product was purified by flash column chromatography.

The method to access **1c**, **1d**, and **1e** has been reported.<sup>15</sup> The method to access **5** has been reported.<sup>16</sup>

### (7) Synthesis of Z-1a

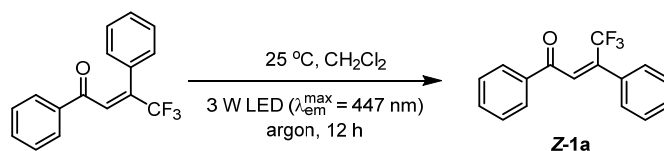

**E-1a** (0.10 mmol, 1.0 equiv.) and DCM (2.0 mL) were sequentially added into the Schlenk tube, and the reaction was degassed three times by freeze-pump-thaw method. The reaction mixture was stirred under an argon atmosphere at 25 °C, then irradiated by a 3 W 447 nm LED at a distance of about 0 cm for another 12 h. The solvent was removed under reduced pressure, and the residue was purified by flash chromatography on *silica gel* (PE/EA = 100/1–50/1 ratio) to give the desired products **Z-1a**.



### 3. General experimental procedures

#### (1) General procedure for the preparation of cycloheptatrienes **2** and **4**

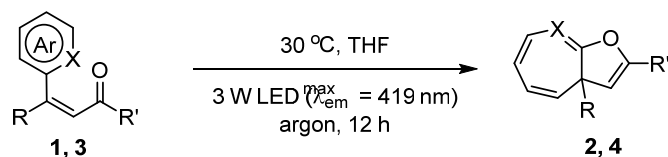

*E*-**1** (0.10 mmol, 1.0 equiv.) or *E*-**3** (0.1 mmol, 1.0 equiv.) and THF (2.0 mL) were sequentially added into the Schlenk tube, and the reaction was degassed three times by freeze-pump-thaw method. The reaction mixture was stirred under an argon atmosphere at 30 °C, then irradiated by a 3 W 419 nm LED at a distance of about 2 cm for another 12 h. The solvent was removed under reduced pressure, and the residue was purified by flash chromatography on *silica gel* (PE/EA = 100/1–50/1 ratio) to give the desired products **2** or **4**.

#### (2) General procedure for 2-oxabicyclo [3.1.0] hex-3-ene **6a-6f**

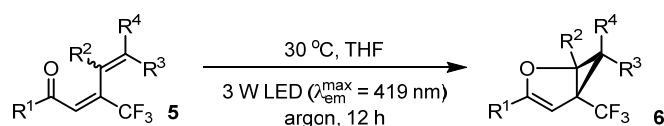

**5** (0.1 mmol, 1.0 equiv.) and THF (2.0 mL) were sequentially added into the Schlenk tube, and the reaction was degassed three times by freeze-pump-thaw method. The reaction mixture was stirred under an argon atmosphere at 30 °C, then irradiated by a 3 W 419 nm LED at a distance of about 2 cm for another 12 h. The solvent was removed under reduced pressure, and the residue was purified by flash chromatography on *silica gel* (PE) to give the desired products **6a-6f**.

#### (3) Gram-scale synthesis

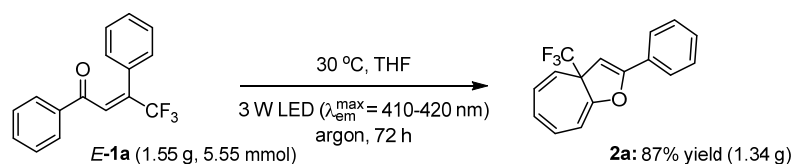

*E*-**1a** (5.55 mmol, 1.0 equiv.) and THF (12.0 mL) were sequentially added into the 25 mL Schlenk tube, and the reaction was degassed three times by freeze-pump-thaw method. The reaction mixture was stirred under an argon atmosphere at 30 °C, then irradiated by a 3 W 410-420 nm LED at a distance of about 0 cm for another 72 h. The solvent was removed under reduced pressure, and the residue was purified by flash chromatography on *silica gel* (PE/EA =

100/1–50/1 ratio) to give the desired product **2a** (1.34g) in 87% yield.

#### (4) One-pot synthesis

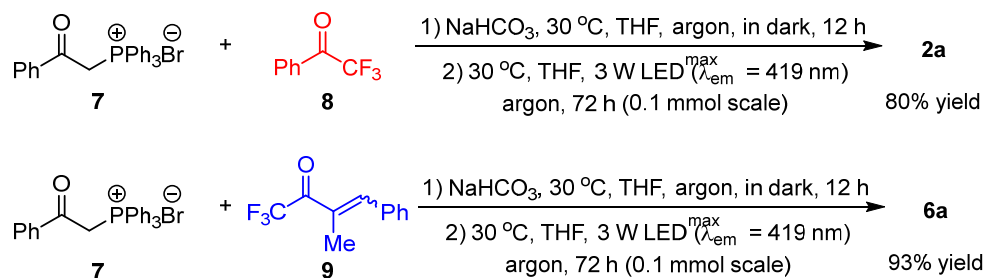

**7** (0.12 mmol, 1.2 equiv.) and **8** (0.1 mmol, 1.0 equiv.) or **9** (0.1 mmol, 1.0 equiv.) in THF (2.0 mL) were sequentially added into the Schlenk tube, and the reaction was degassed three times by freeze-pump-thaw method. The reaction mixture was stirred under an argon atmosphere at 30 °C for 12 h in dark. Then irradiated by a 3 W 419 nm LED at a distance of about 0 cm for another 72 h. The solvent was removed under reduced pressure, and the residue was purified by flash chromatography on *silica gel* (PE/EA = 100/1) to give the desired products **2a** (22.2 mg) in 80% yield or **6a** (29.4 mg) in 93% yield.

## 4. Experimental equipment

### (1) Incubator and setup of reactions

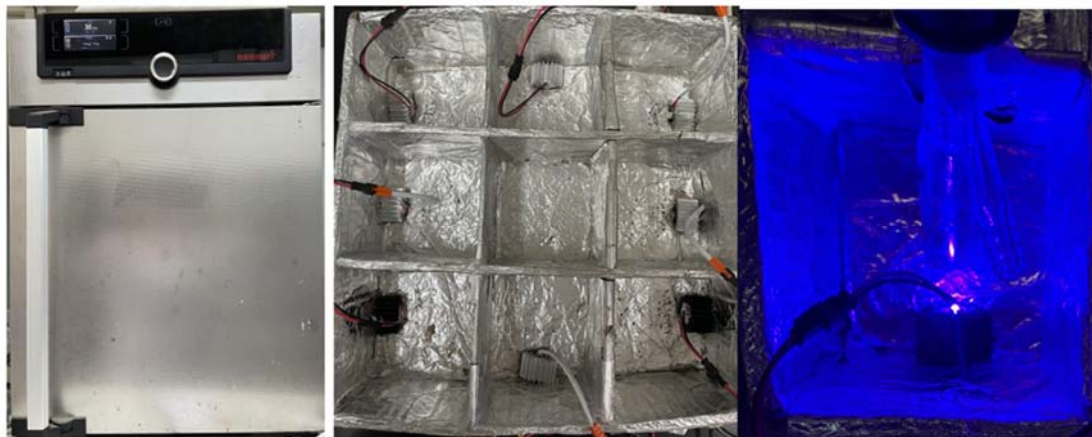

Fig. S1. Incubator and setup of reactions.

### (2) Emission spectrum of the LED light

The following spectrum was recorded by a QE Pro fiber-optic spectrometer which was placed at a fixed distance of 0.5 cm from the used 3 W LED light.

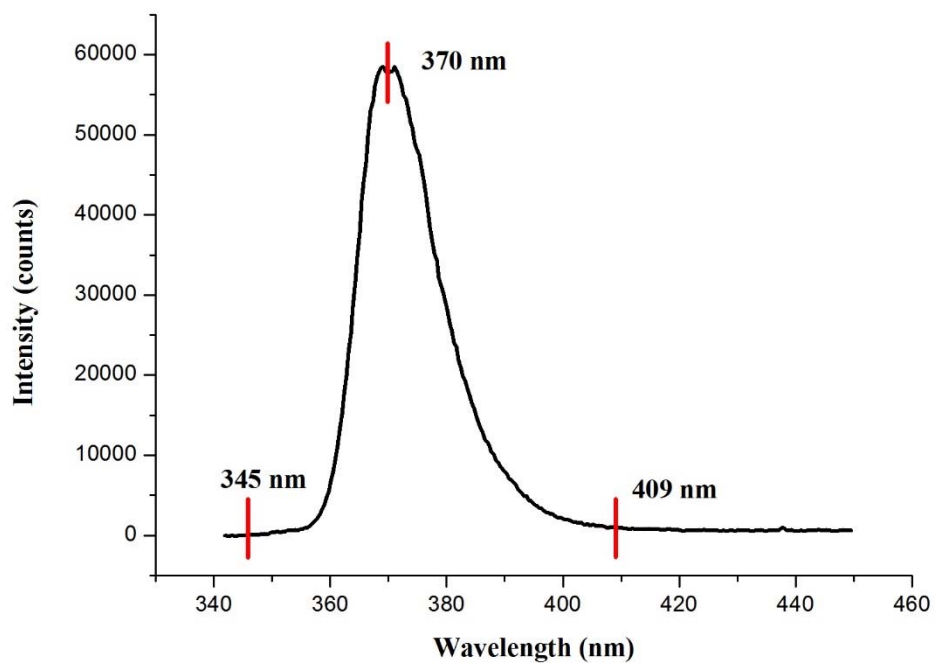

Fig. S2. Emission spectrum of the 3 W LED light (370 nm)

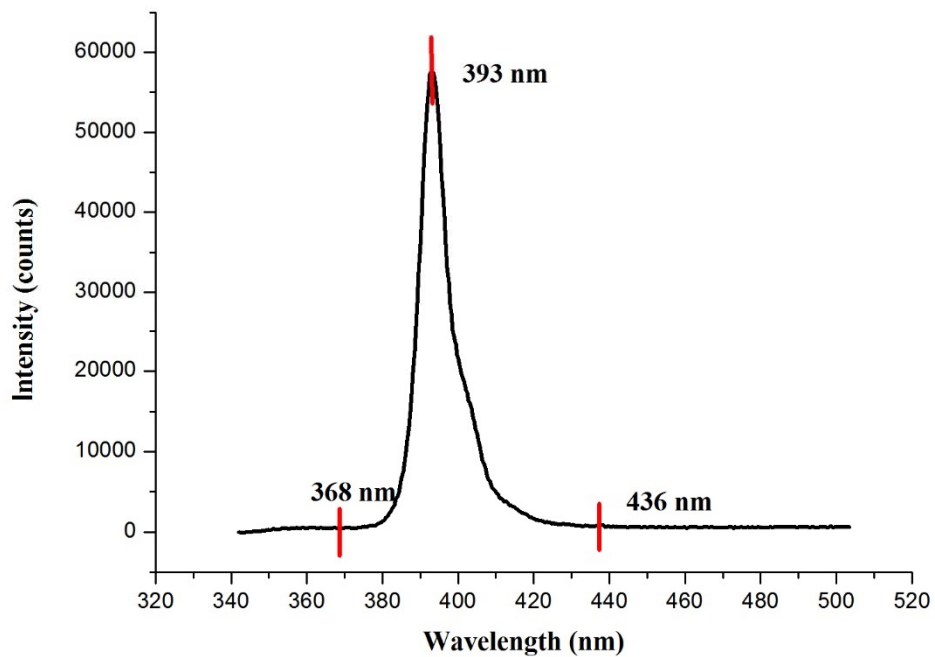

**Fig. S3.** Emission spectrum of the 3 W LED light (393 nm)

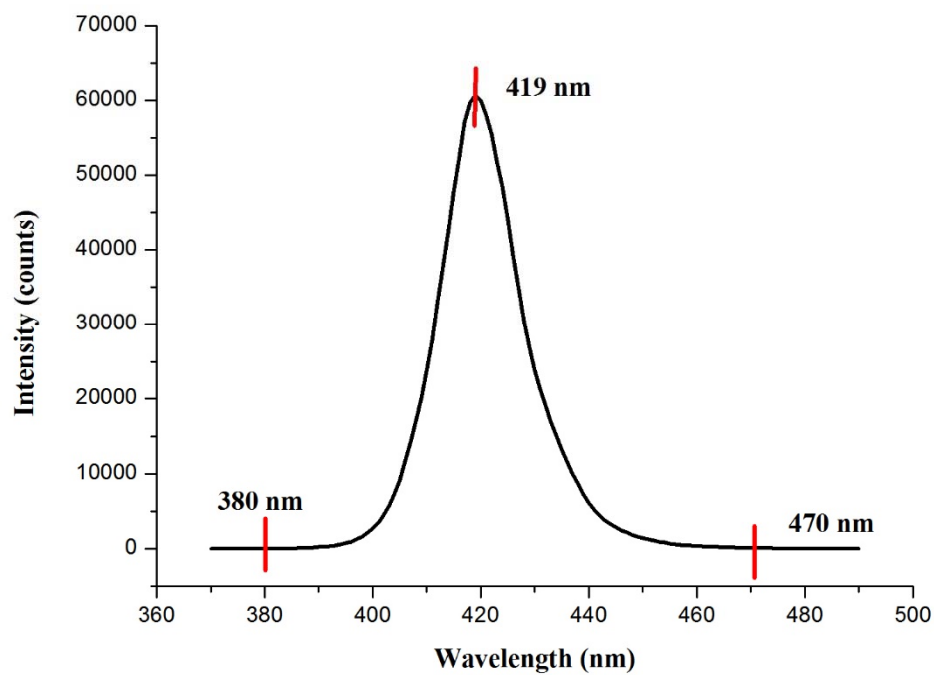

**Fig. S4.** Emission spectrum of the 3 W LED light (419 nm)

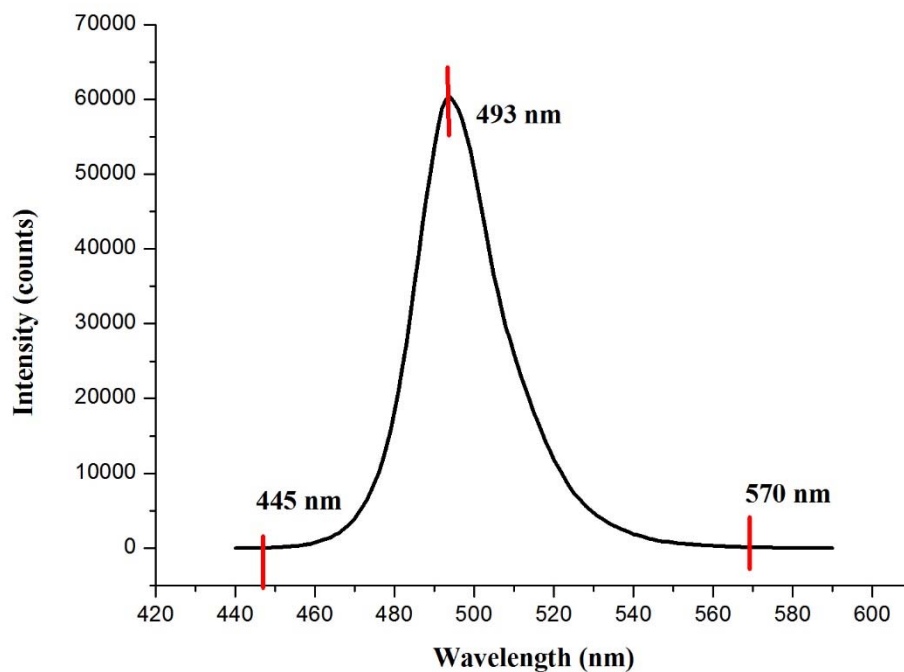

**Fig. S5.** Emission spectrum of the 3 W LED light (493 nm)

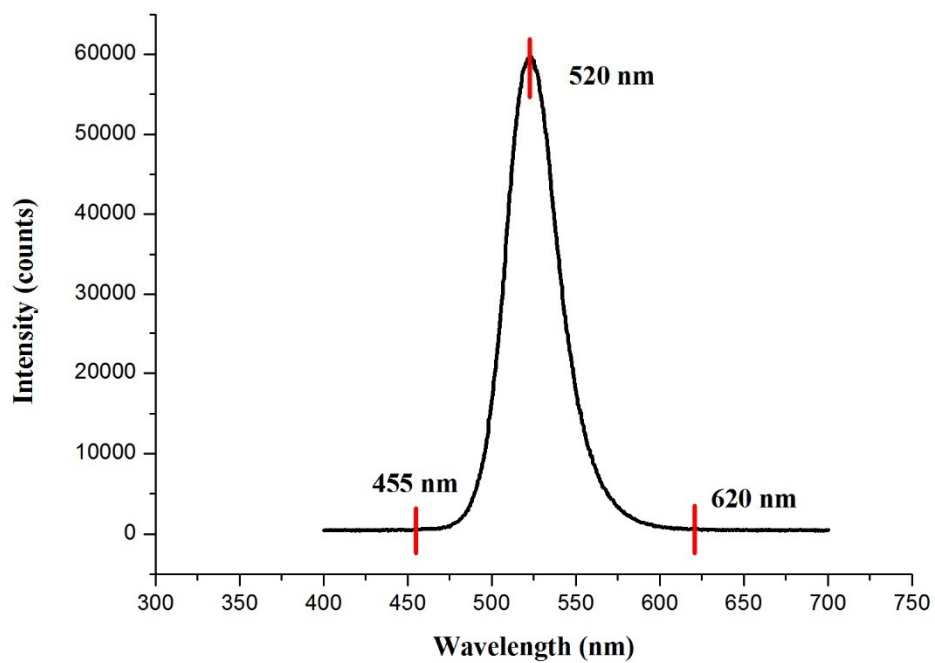

**Fig. S6.** Emission spectrum of the 3 W LED light (520 nm)

## 5. Mechanism studies

### (1) Radical trapping experiments

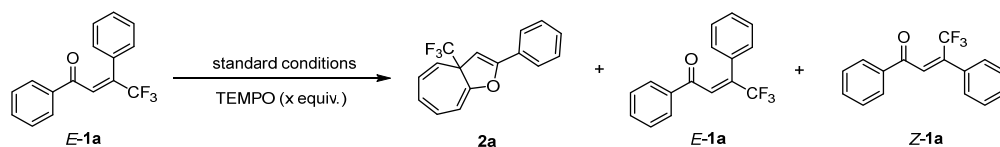

*E-1a* (0.1 mmol, 1.0 equiv.), TEMPO (x mmol, x equiv.) in THF (2.0 mL) were sequentially added into the 25 mL Schlenk tube, and the reaction was degassed three times by freeze-pump-thaw method. The reaction mixture was stirred under an argon atmosphere at 30 °C, then irradiated by a 3 W 410-420 nm LED at a distance of about 2 cm for another 12 h. The solvent was removed under reduced pressure, and the residue was purified by flash chromatography on *silica gel* (PE/EA = 100/1–50/1 ratio) to give the desired products **2a**, *E-1a* and *Z-1a*.

**Table S1.** Effect of TMEPO in reaction

| TEMPO (x equiv.) | yield of <b>2a</b> | recovery of <i>E-1a</i> | yield of <i>Z-1a</i> |
|------------------|--------------------|-------------------------|----------------------|
| 0                | 95%                | trace                   | trace                |
| 1.0              | 87%                | 9%                      | 4%                   |
| 2.0              | 78%                | 14%                     | 8%                   |
| 3.0              | 53%                | 35%                     | 12%                  |
| 4.0              | 38%                | 43%                     | 19%                  |
| 5.0              | 13%                | 60%                     | 27%                  |

**Comments:** 5.0 equiv. of TEMPO was added to the standard conditions as a radical scavenger, and the experimental results confirmed the existence of a radical process.

### (2) UV-vis absorption spectra

UV-vis absorption spectroscopy was performed using a spectrophotometer, equipped with a temperature control unit at 25 °C. The samples were measured in 3.0 mL quartz cuvettes fitted with a PTFE stopper. **1a** and **5a** were prepared as a 0.05 mM solution with fresh THF as the solvent for measurement.

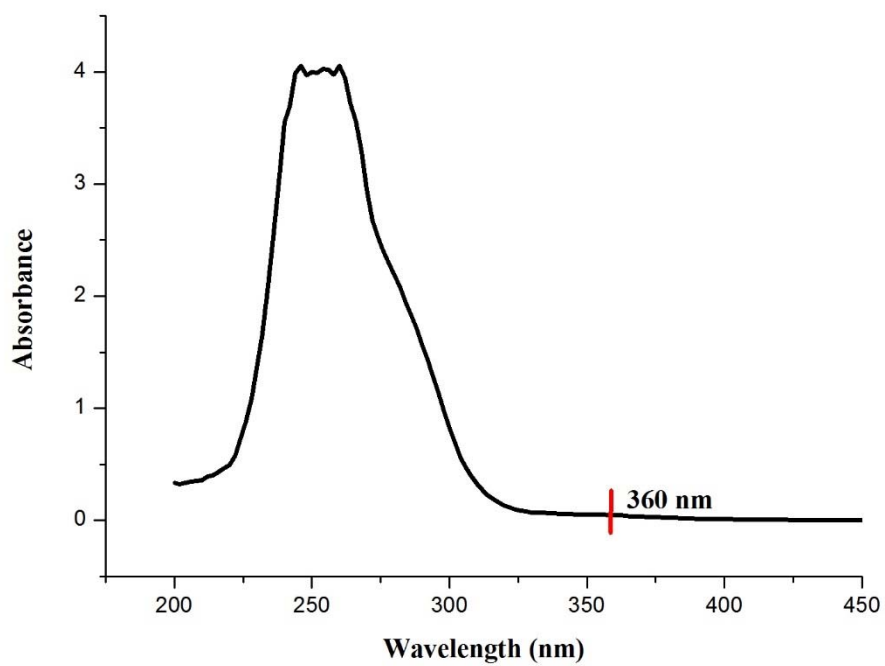

Fig. S7. UV-vis absorption spectra of 1.

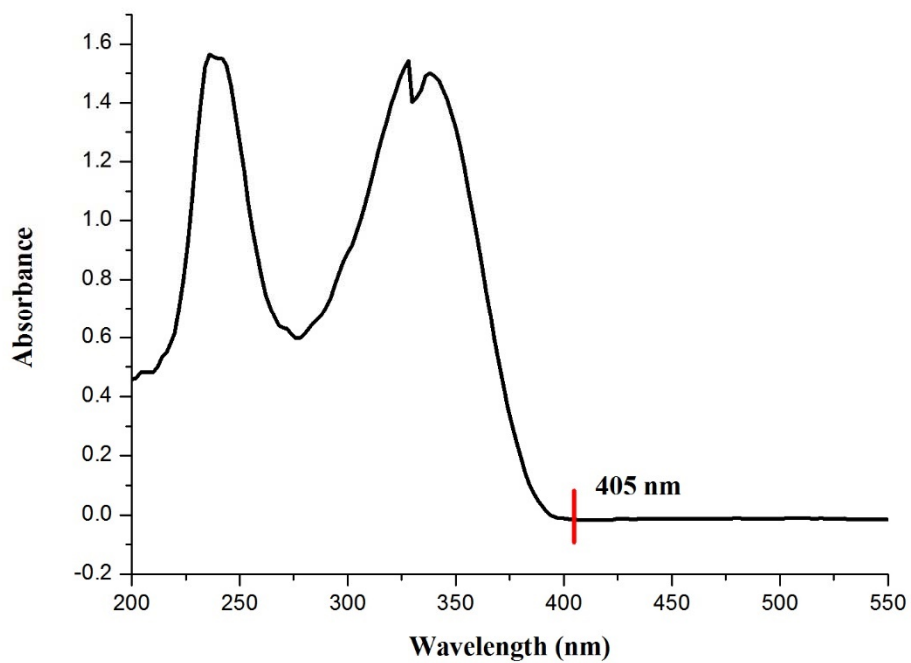

Fig. S8. UV-vis absorption spectra of 5.

**(3) Concentration effect for the transformation of *E*-1a**

**Table S2.** Concentration effect for the transformation of *E-1a*

| conc. of <b>1a</b> (mol/L) | yield of <b>2a</b> | recovery of <i>E-1a</i> | yield of <i>Z-1a</i> |
|----------------------------|--------------------|-------------------------|----------------------|
| 2.0                        | 92%                | N.D.                    | N.D.                 |
| 1.0                        | 93%                | N.D.                    | N.D.                 |
| 0.5                        | 95%                | N.D.                    | N.D.                 |
| 0.3                        | 83%                | trace                   | 12%                  |
| 0.1                        | 78%                | 8%                      | 14%                  |

0.1 mmol scale. N.D. = not detected.

**Comments:** Concentration is critical for high yields. When the concentration is reduced, such as 0.1 mol/L, **2a** is obtained in 78% yield. At the same time, *Z-1a* was isolated in 14% yield, demonstrating the viability of such a transformation by direct photoexcitation.



## 6. DFT caculation

### (1) Computation Details

All the calculations in this work were performed on the basis of density functional theory (DFT) in the Gaussian G16 package (Revision B.01).<sup>[1]</sup> All the reactants, complexes, transition states, intermediates and products were fully optimized at the M06-2X<sup>[2]</sup>/6-31+G(d, p)<sup>[3-5]</sup> level of theory. The nature of the local minima was established with analytical frequencies calculations and the single point energies were subsequently obtained at the same functional and basis set with SMD (tetrahydrofuran) solvent model<sup>[6]</sup> and the temperature was set to 303.15 k in terms of the experiment temperature. Intrinsic reaction coordinate (IRC)<sup>[7-8]</sup> calculations were carried out to ascertain the true nature of the transition states. Three dimensional diagrams of the computed species were generated by using CYL view visualization software<sup>[9]</sup>.

### (2) Plausible reaction pathways for the reaction with alkenes

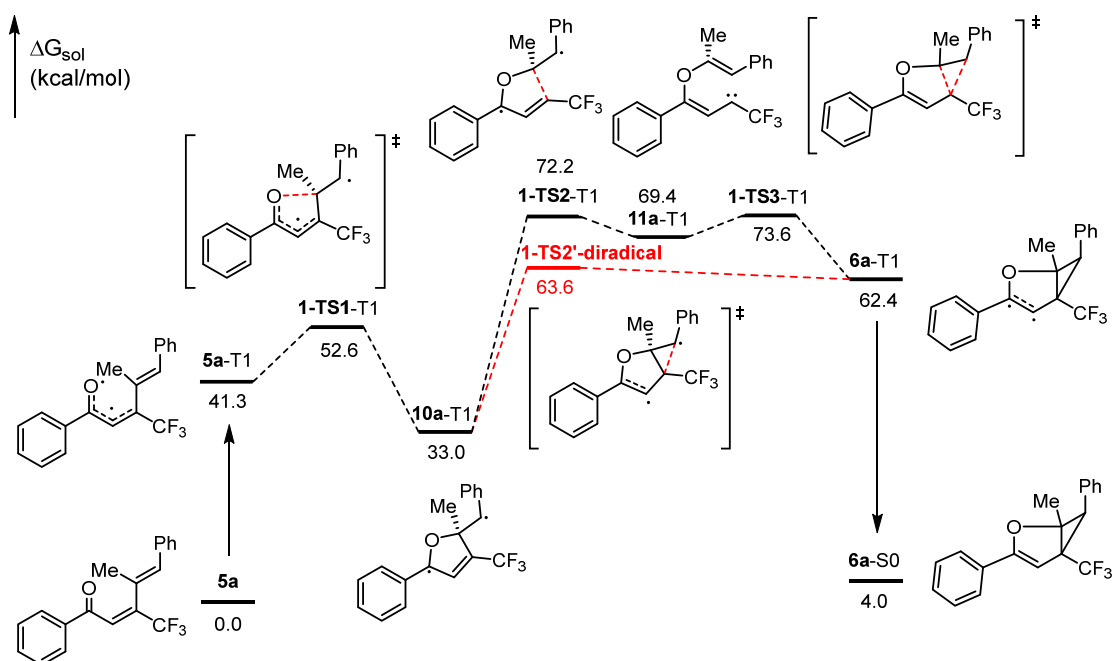

**Scheme S1.** The energy profiles for the reaction with alkenes.

We noticed that the dihydrofuran-based cyclopropanes become the major product when the alkenes substrates are performed. We further examined whether the proposed mechanism is capable to rationalize this intriguing phenomenon. The calculated energy profiles for the formation of cyclopropanes are shown in Scheme S1. Starting from the excitation of **5a** to **5a-T1**, it undergoes the radical addition via transition states **1-TS1-T1** with an activation barrier of 11.3 kcal/mol,

resulting in a diradical intermediate **1-10a-T1**. Then two pathways were considered, i.e. carbene mechanism and diradical mechanism. Along the pathway shown in black, the C-C bond cleavage occurs through transition states **1-TS2-T1** by crossing an activation barrier of 39.2 kcal/mol, leading to the generation of carbene intermediate **1-11a-T1**. Alternatively, the diradical recombination could undergo via transition state **1-TS2'-diradical** with an activation barrier of 30.6 kcal/mol, giving to **6a-T1** (the pathway shown in red). The calculated results show that diradical recombination pathway is more favored than the carbene pathway by 8.6 kcal/mol.

**(3) Cartesian coordination and energies (in Hartree) for the calculated species were performed at the M06-2X/6-31+G\*\* level in solvent**

**E-1a**

Sum of electronic and thermal Free Energies = -990.567872

|   |             |             |             |
|---|-------------|-------------|-------------|
| C | -4.04734000 | 0.83656300  | 1.23158700  |
| C | -2.77197500 | 0.83539200  | 0.66936900  |
| C | -2.48295100 | -0.01248000 | -0.40601000 |
| C | -3.47637300 | -0.85836600 | -0.91512900 |
| C | -4.74947600 | -0.84994200 | -0.35694300 |
| C | -5.03515300 | -0.00243800 | 0.71709000  |
| H | -4.26883900 | 1.49106000  | 2.06862700  |
| H | -2.00456000 | 1.48764700  | 1.07720900  |
| H | -3.23637500 | -1.51244100 | -1.74763400 |
| H | -5.52071900 | -1.50169500 | -0.75543700 |
| H | -6.02995800 | 0.00234100  | 1.15250500  |
| C | -1.12157400 | -0.05515400 | -1.01524100 |
| C | -0.14770100 | 1.01846000  | -0.62158900 |
| H | -0.50006400 | 2.04394000  | -0.70302900 |
| O | -0.80909200 | -0.90025200 | -1.83436000 |
| C | 1.10112300  | 0.76522100  | -0.22062600 |
| C | 1.65861900  | -0.58804500 | 0.04943800  |
| C | 2.83611800  | -1.03245500 | -0.56341600 |
| C | 0.98914800  | -1.43034200 | 0.94545900  |

---

|   |            |             |             |
|---|------------|-------------|-------------|
| C | 3.32537000 | -2.30853100 | -0.29066700 |
| H | 3.35878200 | -0.39491700 | -1.26896700 |
| C | 1.48223100 | -2.70412600 | 1.21647400  |
| H | 0.08371700 | -1.07991800 | 1.43505900  |
| C | 2.65186800 | -3.14583500 | 0.59824800  |
| H | 4.23328500 | -2.64927400 | -0.77877700 |
| H | 0.95508800 | -3.34837700 | 1.91343500  |
| H | 3.03754100 | -4.13866100 | 0.80906900  |
| C | 2.01579500 | 1.92851000  | 0.07492500  |
| F | 2.50464700 | 1.86265900  | 1.32843500  |
| F | 1.41291900 | 3.12177000  | -0.04523000 |
| F | 3.08226200 | 1.95154200  | -0.75042600 |

**E-1a-T1**

Sum of electronic and thermal Free Energies= -990.495892

|   |             |             |             |
|---|-------------|-------------|-------------|
| C | -4.61250400 | -0.01775300 | 1.31849400  |
| C | -3.26149900 | 0.22331200  | 1.07448300  |
| C | -2.69103900 | -0.15417000 | -0.14705100 |
| C | -3.48765900 | -0.77146200 | -1.11935100 |
| C | -4.83278300 | -1.02194600 | -0.86872300 |
| C | -5.39738500 | -0.64495400 | 0.35158800  |
| H | -5.05149000 | 0.28754000  | 2.26320900  |
| H | -2.67003300 | 0.72803000  | 1.83204500  |
| H | -3.03792100 | -1.05311200 | -2.06631100 |
| H | -5.44215800 | -1.50911500 | -1.62366400 |
| H | -6.44828500 | -0.83678400 | 0.54644000  |
| C | -1.25153300 | 0.09295900  | -0.47573400 |
| C | -0.29670100 | 0.30339100  | 0.60107400  |
| H | -0.61265400 | 0.27798800  | 1.64007800  |
| O | -0.86266400 | 0.09663000  | -1.64712800 |
| C | 1.11903600  | 0.53871400  | 0.28816300  |
| C | 2.07382700  | -0.52170800 | 0.21926200  |

---

|   |            |             |             |
|---|------------|-------------|-------------|
| C | 3.44726500 | -0.29612800 | -0.05834500 |
| C | 1.64836400 | -1.85740000 | 0.43746900  |
| C | 4.33735300 | -1.35768800 | -0.11325100 |
| H | 3.81571500 | 0.70930300  | -0.22956700 |
| C | 2.54904900 | -2.90915800 | 0.37805500  |
| H | 0.60178200 | -2.05824700 | 0.65028500  |
| C | 3.89838500 | -2.66762000 | 0.10297500  |
| H | 5.38389100 | -1.16442500 | -0.32727800 |
| H | 2.20059100 | -3.92360800 | 0.54496000  |
| H | 4.60198700 | -3.49280100 | 0.05695700  |
| C | 1.52574000 | 1.95303500  | 0.01316900  |
| F | 2.44942600 | 2.41369300  | 0.88945100  |
| F | 0.47767700 | 2.79293400  | 0.08690900  |
| F | 2.06760700 | 2.11711100  | -1.21233800 |

**TS1-T1**

Sum of electronic and thermal Free Energies = -990.469478

|   |             |             |             |
|---|-------------|-------------|-------------|
| C | -4.69577100 | -1.11285300 | 0.06205600  |
| C | -3.30734900 | -1.16955100 | 0.06740000  |
| C | -2.54623000 | 0.01318000  | 0.00239600  |
| C | -3.21773400 | 1.24767900  | -0.06191000 |
| C | -4.60853900 | 1.29489600  | -0.06605400 |
| C | -5.35529000 | 0.11766300  | -0.00527100 |
| H | -5.26802800 | -2.03437100 | 0.11287300  |
| H | -2.81606500 | -2.13543300 | 0.12741600  |
| H | -2.63919400 | 2.16444400  | -0.11076000 |
| H | -5.11160000 | 2.25595500  | -0.11799600 |
| H | -6.44022100 | 0.15624000  | -0.00885600 |
| C | -1.08449900 | -0.01751600 | 0.00273500  |
| C | -0.27434200 | -1.17009400 | -0.00534300 |
| H | -0.67058100 | -2.17791100 | -0.01712300 |
| O | -0.44222000 | 1.13258900  | 0.00416500  |

---

|   |            |             |             |
|---|------------|-------------|-------------|
| C | 1.06786500 | -0.88557700 | -0.00649200 |
| C | 1.45941600 | 0.55368700  | 0.00551500  |
| C | 1.86255400 | 1.16525600  | 1.24295700  |
| C | 1.87296400 | 1.18299900  | -1.21940600 |
| C | 2.48561200 | 2.39310600  | 1.24546600  |
| H | 1.62444200 | 0.65291600  | 2.17038900  |
| C | 2.49587600 | 2.41082700  | -1.19882200 |
| H | 1.64279700 | 0.68414100  | -2.15611500 |
| C | 2.79281400 | 3.02715200  | 0.02909700  |
| H | 2.75196500 | 2.86764600  | 2.18419000  |
| H | 2.77006400 | 2.89897700  | -2.12827600 |
| H | 3.28288900 | 3.99560200  | 0.03814700  |
| C | 2.13036500 | -1.91178600 | -0.01804500 |
| F | 2.95998900 | -1.80164700 | -1.08819900 |
| F | 1.63993300 | -3.16402200 | -0.04034700 |
| F | 2.94952600 | -1.83692300 | 1.06355900  |

**7a-T1**

Sum of electronic and thermal Free Energies = -990.483720

|   |            |             |             |
|---|------------|-------------|-------------|
| C | 4.79391900 | 1.03739600  | -0.01074700 |
| C | 3.41209600 | 1.17198800  | -0.01278000 |
| C | 2.58680000 | 0.02956600  | 0.00136900  |
| C | 3.18545500 | -1.24476200 | 0.01784700  |
| C | 4.57094900 | -1.36755200 | 0.01958800  |
| C | 5.38172800 | -0.23139800 | 0.00527100  |
| H | 5.41817000 | 1.92574700  | -0.02155500 |
| H | 2.96906100 | 2.16323700  | -0.02504600 |
| H | 2.55774400 | -2.12949600 | 0.02854900  |
| H | 5.02030400 | -2.35598700 | 0.03193000  |
| H | 6.46262500 | -0.33145900 | 0.00659000  |
| C | 1.14952300 | 0.15694300  | -0.00139600 |
| C | 0.32670400 | 1.29306600  | -0.02191700 |

---

|   |             |             |             |
|---|-------------|-------------|-------------|
| H | 0.67073300  | 2.31919300  | -0.03537000 |
| O | 0.40902300  | -0.97816000 | 0.01854800  |
| C | -0.97601100 | 0.87225200  | -0.02124100 |
| C | -1.02948100 | -0.64882100 | -0.00052600 |
| C | -1.65349500 | -1.19518800 | 1.25211600  |
| C | -1.61914100 | -1.23005600 | -1.25490900 |
| C | -2.67994700 | -2.08983200 | 1.22265500  |
| H | -1.24582900 | -0.82655900 | 2.18944600  |
| C | -2.64355500 | -2.12705200 | -1.23025600 |
| H | -1.18515800 | -0.88577100 | -2.18969500 |
| C | -3.20392300 | -2.56986100 | -0.00507500 |
| H | -3.10323400 | -2.44671700 | 2.15701900  |
| H | -3.03847800 | -2.51196000 | -2.16588800 |
| H | -4.02072700 | -3.28240700 | -0.00615700 |
| C | -2.17903200 | 1.72740200  | -0.00348000 |
| F | -3.06011200 | 1.41467100  | -0.98147600 |
| F | -1.87185900 | 3.02920600  | -0.15595400 |
| F | -2.88057700 | 1.63200200  | 1.15328300  |

**TS2-T1**

Sum of electronic and thermal Free Energies = -990.446073

|   |            |             |             |
|---|------------|-------------|-------------|
| C | 4.73899000 | 1.17077500  | -0.10362500 |
| C | 3.35116000 | 1.20972700  | -0.09001300 |
| C | 2.60526700 | 0.01810900  | 0.00890900  |
| C | 3.29358100 | -1.20742300 | 0.08949400  |
| C | 4.68453300 | -1.23515500 | 0.07528900  |
| C | 5.41467300 | -0.05019500 | -0.02041000 |
| H | 5.29852700 | 2.09797400  | -0.18134700 |
| H | 2.84626700 | 2.16778000  | -0.16139300 |
| H | 2.73269800 | -2.13252400 | 0.16466900  |
| H | 5.20054500 | -2.18833800 | 0.13996000  |
| H | 6.49988800 | -0.07532100 | -0.03138900 |

---

|   |             |             |             |
|---|-------------|-------------|-------------|
| C | 1.15673600  | 0.04524900  | 0.02712300  |
| C | 0.30978300  | 1.15645000  | 0.01139500  |
| H | 0.71196600  | 2.16684300  | -0.01367500 |
| O | 0.55391200  | -1.17475400 | 0.09436900  |
| C | -1.02197700 | 0.89002800  | 0.04260800  |
| C | -0.84019000 | -1.24202800 | 0.02687600  |
| C | -1.53338000 | -1.57763500 | 1.21541600  |
| C | -1.42655900 | -1.50654500 | -1.23668200 |
| C | -2.86816100 | -1.93969800 | 1.13310100  |
| H | -1.01757100 | -1.48848100 | 2.16627600  |
| C | -2.76171700 | -1.86920100 | -1.29263900 |
| H | -0.82985500 | -1.36409500 | -2.13243500 |
| C | -3.49379300 | -2.06247700 | -0.11373700 |
| H | -3.42483100 | -2.14446700 | 2.04218500  |
| H | -3.23656800 | -2.01982000 | -2.25704400 |
| H | -4.53921400 | -2.34846000 | -0.16798000 |
| C | -2.20624500 | 1.74709600  | 0.03400000  |
| F | -2.97950900 | 1.56477700  | -1.06308400 |
| F | -1.90088700 | 3.06879700  | 0.06129300  |
| F | -3.01842100 | 1.52692300  | 1.09452500  |

**TS1'-T1**

Sum of electronic and thermal Free Energies= -990.472097

|   |             |             |             |
|---|-------------|-------------|-------------|
| C | -4.57322400 | -1.20640900 | 0.22550700  |
| C | -3.18348700 | -1.14323900 | 0.21970800  |
| C | -2.52896000 | 0.09123400  | 0.06850800  |
| C | -3.30328200 | 1.25671100  | -0.05489700 |
| C | -4.69330300 | 1.18670400  | -0.04953400 |
| C | -5.33524400 | -0.04429700 | 0.08833200  |
| H | -5.06365200 | -2.16774700 | 0.34543700  |
| H | -2.61507700 | -2.05829500 | 0.35069200  |
| H | -2.80332900 | 2.21330000  | -0.16332800 |

---

|   |             |             |             |
|---|-------------|-------------|-------------|
| H | -5.27671000 | 2.09669700  | -0.15358500 |
| H | -6.41955500 | -0.09873000 | 0.09463000  |
| C | -1.05363500 | 0.20522400  | 0.06198800  |
| C | -0.21183400 | -0.90057100 | -0.18338200 |
| H | -0.66627500 | -1.86990000 | -0.34925400 |
| O | -0.56832500 | 1.39444500  | 0.28573900  |
| C | 1.17357400  | -0.79480500 | -0.17919500 |
| C | 1.82318000  | 0.49998000  | -0.11586400 |
| C | 2.98863400  | 0.76947100  | 0.61281600  |
| C | 1.16382100  | 1.58406800  | -0.79262600 |
| C | 3.44077900  | 2.07831400  | 0.73541600  |
| H | 3.51128900  | -0.02957400 | 1.12865400  |
| C | 1.64429700  | 2.90931900  | -0.64699200 |
| H | 0.53125700  | 1.35214100  | -1.64351700 |
| C | 2.75723000  | 3.15567300  | 0.12518500  |
| H | 4.32704000  | 2.27969500  | 1.32942200  |
| H | 1.14107300  | 3.71326200  | -1.17431800 |
| H | 3.13556100  | 4.16580500  | 0.24201500  |
| C | 2.00219700  | -2.02935800 | -0.11457500 |
| F | 3.11989900  | -1.94715000 | -0.87092500 |
| F | 1.33564400  | -3.12435800 | -0.52571500 |
| F | 2.44229200  | -2.31297500 | 1.14162500  |

**7a'-T1**

Sum of electronic and thermal Free Energies = -990.484259

|   |             |             |             |
|---|-------------|-------------|-------------|
| C | -4.53952200 | -1.32488300 | 0.19724500  |
| C | -3.15448300 | -1.25375100 | 0.12921400  |
| C | -2.50836300 | -0.01064400 | -0.03055300 |
| C | -3.30016500 | 1.15061300  | -0.13110800 |
| C | -4.68693800 | 1.06800800  | -0.06644000 |
| C | -5.31511700 | -0.16652400 | 0.09987200  |
| H | -5.01820900 | -2.29136200 | 0.32178700  |



---

|   |             |             |             |
|---|-------------|-------------|-------------|
| H | -2.57855600 | -2.17046500 | 0.19491200  |
| H | -2.82185900 | 2.11534200  | -0.25501900 |
| H | -5.27972400 | 1.97441700  | -0.14370800 |
| H | -6.39767300 | -0.22798000 | 0.15111200  |
| C | -1.06140600 | 0.08719300  | -0.09919300 |
| C | -0.14947400 | -0.96016700 | 0.08792200  |
| H | -0.52896200 | -1.93025400 | 0.38508700  |
| O | -0.60691300 | 1.34516800  | -0.37458800 |
| C | 1.19377000  | -0.78103100 | -0.11678700 |
| C | 1.70010900  | 0.55516000  | -0.62694300 |
| C | 3.11742500  | 0.93109800  | -0.28364900 |
| C | 0.73291400  | 1.61527400  | -0.19594600 |
| C | 3.44528600  | 2.16361000  | 0.19859900  |
| H | 3.89430200  | 0.20544300  | -0.50147200 |
| C | 1.09145100  | 2.83101900  | 0.29093800  |
| H | 1.64284500  | 0.47927600  | -1.73579500 |
| C | 2.46155100  | 3.14591900  | 0.47722300  |
| H | 4.49033300  | 2.39718400  | 0.38123900  |
| H | 0.31430700  | 3.54364100  | 0.55044500  |
| H | 2.74602400  | 4.11798000  | 0.86159800  |
| C | 2.14970800  | -1.90479300 | 0.05255700  |
| F | 2.93266600  | -2.07058200 | -1.04115300 |
| F | 1.54229900  | -3.08337200 | 0.27648200  |
| F | 3.00636900  | -1.71839900 | 1.08565100  |

**TS2'-T1**

Sum of electronic and thermal Free Energies = -990.444132

|   |            |             |             |
|---|------------|-------------|-------------|
| C | 4.56451400 | -1.31970100 | 0.03755800  |
| C | 3.17723000 | -1.24716600 | 0.06198400  |
| C | 2.52535600 | 0.00090600  | 0.02480400  |
| C | 3.31045600 | 1.16855400  | -0.01682700 |
| C | 4.69910700 | 1.08648500  | -0.03687600 |

---

|   |             |             |             |
|---|-------------|-------------|-------------|
| C | 5.33423700  | -0.15521100 | -0.01360900 |
| H | 5.04812300  | -2.29121800 | 0.06862700  |
| H | 2.60467700  | -2.16621700 | 0.12851600  |
| H | 2.82689600  | 2.13841700  | -0.03990700 |
| H | 5.28734300  | 1.99842300  | -0.07281800 |
| H | 6.41794000  | -0.21669600 | -0.02924100 |
| C | 1.07019600  | 0.09850000  | 0.03796100  |
| C | 0.19172300  | -0.97370800 | -0.15501200 |
| H | 0.63586200  | -1.93373900 | -0.41443400 |
| O | 0.62388900  | 1.37544000  | 0.21540700  |
| C | -1.16530600 | -0.87731700 | -0.04068300 |
| C | -1.59363400 | 0.93814000  | 1.05702100  |
| C | -2.96893500 | 1.25848700  | 1.02106700  |
| C | -0.72919800 | 1.63977000  | 0.18486100  |
| C | -3.45501000 | 2.15615100  | 0.07978000  |
| H | -3.64046600 | 0.77924700  | 1.72618800  |
| C | -1.20379600 | 2.54978700  | -0.74145100 |
| H | -1.17983800 | 0.42138700  | 1.91847000  |
| C | -2.57772400 | 2.80533400  | -0.79604500 |
| H | -4.51736200 | 2.37508300  | 0.03925800  |
| H | -0.50833200 | 3.03714300  | -1.41708100 |
| H | -2.96016200 | 3.51512300  | -1.52240900 |
| C | -2.18376400 | -1.92311100 | -0.16156300 |
| F | -2.80109200 | -2.17758000 | 1.01921400  |
| F | -1.69171000 | -3.11076700 | -0.59151300 |
| F | -3.17147600 | -1.58897200 | -1.02395100 |

**TS2'-diradical**

Sum of electronic and thermal Free Energies = -990.428623

|   |             |             |            |
|---|-------------|-------------|------------|
| C | -4.69428100 | -1.09404300 | 0.40587900 |
|---|-------------|-------------|------------|

---

|   |             |             |             |
|---|-------------|-------------|-------------|
| C | -3.30548600 | -1.09305600 | 0.46943300  |
| C | -2.58165700 | 0.04307200  | 0.07449800  |
| C | -3.27341600 | 1.18181000  | -0.36451200 |
| C | -4.66453300 | 1.17584000  | -0.41871100 |
| C | -5.37876400 | 0.03964400  | -0.03797600 |
| H | -5.24517300 | -1.97769300 | 0.71289000  |
| H | -2.78174400 | -1.97001300 | 0.83818000  |
| H | -2.72004200 | 2.06500500  | -0.66568600 |
| H | -5.19166800 | 2.06119700  | -0.76066400 |
| H | -6.46361800 | 0.03814000  | -0.08077600 |
| C | -1.12159800 | 0.03114200  | 0.11043500  |
| C | -0.26037500 | -1.01827000 | 0.22200800  |
| H | -0.57227700 | -2.05275600 | 0.13407500  |
| O | -0.51731600 | 1.23455800  | -0.09652800 |
| C | 1.10794600  | -0.60728700 | 0.31001400  |
| C | 0.86464300  | 1.19011500  | 0.00153200  |
| C | 1.43746500  | 0.57668600  | 1.20803200  |
| C | 1.61093700  | 1.93917900  | -0.89029500 |
| C | 2.84542900  | 0.93716100  | 1.48796400  |
| H | 0.78488100  | 0.58250000  | 2.08457100  |
| C | 3.02133000  | 2.17779400  | -0.60025800 |
| H | 1.14697500  | 2.31702000  | -1.79401900 |
| C | 3.58547700  | 1.71286600  | 0.55830900  |
| H | 3.31770200  | 0.50725100  | 2.36305100  |
| H | 3.60295100  | 2.76667900  | -1.30098100 |
| H | 4.62581200  | 1.93564700  | 0.77713600  |
| C | 2.11438700  | -1.52122900 | -0.32053200 |
| F | 3.39422100  | -1.23081800 | -0.05827500 |
| F | 1.99200100  | -1.54046800 | -1.66793500 |
| F | 1.92374300  | -2.80404400 | 0.07838000  |

8a-T1

---

Sum of electronic and thermal Free Energies= -990.455733

|   |             |             |             |
|---|-------------|-------------|-------------|
| C | -4.55590900 | 1.25828100  | -0.07772900 |
| C | -3.17462900 | 1.25381800  | 0.07373200  |
| C | -2.46486000 | 0.03824400  | 0.10106300  |
| C | -3.18288300 | -1.16700500 | -0.00572100 |
| C | -4.56597100 | -1.15349700 | -0.15522900 |
| C | -5.25881600 | 0.05671400  | -0.19555500 |
| H | -5.08878900 | 2.20401600  | -0.09312300 |
| H | -2.65308900 | 2.19783800  | 0.19365000  |
| H | -2.64804600 | -2.11016000 | 0.01980000  |
| H | -5.10397500 | -2.09246500 | -0.24319100 |
| H | -6.33815600 | 0.06531800  | -0.31160700 |
| C | -1.01303500 | 0.00283600  | 0.23974100  |
| C | -0.17082300 | 1.10016000  | 0.03875500  |
| H | -0.63182300 | 2.01983300  | -0.32141800 |
| O | -0.53306600 | -1.20079500 | 0.65557400  |
| C | 1.17337500  | 1.10985100  | 0.24878300  |
| C | 0.72892400  | -1.62415800 | 0.26718800  |
| C | 1.07033400  | -1.68495900 | -1.08264500 |
| C | 1.60333800  | -2.04555400 | 1.26288700  |
| C | 2.33311200  | -2.15554400 | -1.43326000 |
| H | 0.36123500  | -1.35451500 | -1.83664900 |
| C | 2.86208200  | -2.52041600 | 0.89581200  |
| H | 1.29741100  | -1.98705500 | 2.30262800  |
| C | 3.23170400  | -2.57050400 | -0.44810300 |
| H | 2.61404400  | -2.19969900 | -2.48098000 |
| H | 3.55538900  | -2.84582700 | 1.66515600  |
| H | 4.21486100  | -2.93461300 | -0.72879300 |
| C | 2.21336300  | 2.11373300  | 0.01393000  |
| F | 2.96753500  | 2.34188400  | 1.11058100  |
| F | 1.70069700  | 3.30819800  | -0.35886700 |

---

F 3.07728200 1.74677200 -0.95971100

**9a-T1**

Sum of electronic and thermal Free Energies = -990.432504

|   |             |             |             |
|---|-------------|-------------|-------------|
| C | 4.75576300  | 1.04062900  | 0.39857300  |
| C | 3.36698100  | 1.09629800  | 0.42799600  |
| C | 2.60806100  | -0.02042000 | 0.04878600  |
| C | 3.26144000  | -1.19341600 | -0.34889100 |
| C | 4.65414100  | -1.24410600 | -0.37398800 |
| C | 5.40450900  | -0.12983100 | -0.00272900 |
| H | 5.33445500  | 1.91049500  | 0.69376800  |
| H | 2.87117500  | 2.00708200  | 0.75074000  |
| H | 2.67910200  | -2.06208700 | -0.63722400 |
| H | 5.15209000  | -2.15772700 | -0.68408800 |
| H | 6.48928500  | -0.17150400 | -0.02162500 |
| C | 1.14201600  | 0.04251300  | 0.05959100  |
| C | 0.30413800  | 1.07177700  | 0.28758000  |
| H | 0.58428800  | 2.10046600  | 0.46991100  |
| O | 0.49448200  | -1.12921500 | -0.23673000 |
| C | -1.08213000 | 0.57115800  | 0.23001500  |
| C | -0.89907500 | -0.93584000 | -0.10093300 |
| C | -1.42159400 | -0.55280300 | 1.24498300  |
| C | -1.72041300 | -1.74069200 | -0.99526400 |
| C | -2.81123200 | -0.93501700 | 1.53253600  |
| H | -0.71936700 | -0.56203300 | 2.07673500  |
| C | -3.01726400 | -2.21924400 | -0.54755900 |
| H | -1.34747500 | -1.95004700 | -1.99075600 |
| C | -3.53084800 | -1.83949500 | 0.64854300  |
| H | -3.30788800 | -0.49596600 | 2.39002200  |
| H | -3.56803900 | -2.89242600 | -1.19663300 |
| H | -4.50283400 | -2.20423200 | 0.96696700  |
| C | -2.13274100 | 1.47532300  | -0.33180800 |

---

|   |             |            |             |
|---|-------------|------------|-------------|
| F | -3.26921100 | 0.84741200 | -0.66627500 |
| F | -1.69746400 | 2.10910200 | -1.43924000 |
| F | -2.46789800 | 2.44245100 | 0.55122900  |

**8a-S0**

Sum of electronic and thermal Free Energies = -990.459585

|   |             |             |             |
|---|-------------|-------------|-------------|
| C | 4.45115100  | 0.92565600  | -0.10421700 |
| C | 3.06320500  | 0.97819600  | -0.14087700 |
| C | 2.31546000  | -0.20595900 | -0.02076600 |
| C | 2.97654300  | -1.43784500 | 0.13253800  |
| C | 4.36348600  | -1.47880300 | 0.18074700  |
| C | 5.10081500  | -0.29874300 | 0.06114000  |
| H | 5.02697400  | 1.83901900  | -0.21014700 |
| H | 2.56637800  | 1.92983000  | -0.29471500 |
| H | 2.40024700  | -2.35144200 | 0.23067200  |
| H | 4.87124900  | -2.42864500 | 0.31183400  |
| H | 6.18556000  | -0.33416000 | 0.09385300  |
| C | 0.85325800  | -0.16684800 | -0.06431700 |
| C | 0.11536400  | 1.02228300  | 0.20347200  |
| H | 0.68642400  | 1.79461200  | 0.71903500  |
| O | 0.33265300  | -1.31953800 | -0.39564000 |
| C | -1.15341600 | 1.18263300  | -0.28346900 |
| C | -1.00328500 | -1.70158300 | -0.17344000 |
| C | -1.47531300 | -1.78606700 | 1.12815500  |
| C | -1.73655400 | -2.11463900 | -1.27237000 |
| C | -2.77111200 | -2.25781200 | 1.32399600  |
| H | -0.85324800 | -1.47354800 | 1.96135100  |
| C | -3.03053500 | -2.58610700 | -1.05722100 |
| H | -1.31265400 | -2.04081400 | -2.26828800 |
| C | -3.55135200 | -2.65076800 | 0.23520000  |
| H | -3.16783400 | -2.32170300 | 2.33226900  |
| H | -3.63166200 | -2.89935800 | -1.90483800 |

---

|   |             |             |             |
|---|-------------|-------------|-------------|
| H | -4.56102800 | -3.01495100 | 0.39554500  |
| C | -1.69518900 | 2.55297700  | -0.03267400 |
| F | -1.95258700 | 3.18317300  | -1.20319400 |
| F | -0.93804300 | 3.44337500  | 0.68074900  |
| F | -2.86567900 | 2.48434700  | 0.64501800  |

**TS3-S0**

Sum of electronic and thermal Free Energies = -990.436558

|   |             |             |             |
|---|-------------|-------------|-------------|
| C | -4.52483600 | 1.14166200  | 0.38080900  |
| C | -3.13820800 | 1.08169700  | 0.45017400  |
| C | -2.46126700 | -0.09372100 | 0.08539700  |
| C | -3.20175700 | -1.21169000 | -0.33130400 |
| C | -4.58957300 | -1.14434100 | -0.39864300 |
| C | -5.25481400 | 0.03049600  | -0.04635000 |
| H | -5.03813000 | 2.05411500  | 0.66733300  |
| H | -2.57941700 | 1.94436000  | 0.80096600  |
| H | -2.69061900 | -2.12845200 | -0.60411200 |
| H | -5.15314100 | -2.01207300 | -0.72679800 |
| H | -6.33811700 | 0.07912700  | -0.09886700 |
| C | -0.99935700 | -0.15225000 | 0.17996700  |
| C | -0.16428700 | 0.98161200  | 0.15542300  |
| H | -0.64557600 | 1.83052500  | -0.33600700 |
| O | -0.50908400 | -1.37998200 | 0.00067900  |
| C | 1.13759700  | 1.10535000  | 0.56131500  |
| C | 0.83176900  | -1.62643600 | 0.12510800  |
| C | 1.42454700  | -2.43381800 | -0.85247900 |
| C | 1.55543300  | -1.05408600 | 1.17958800  |
| C | 2.78239000  | -2.68001100 | -0.77301000 |
| H | 0.81489800  | -2.83293100 | -1.65695300 |
| C | 2.93927900  | -1.36000200 | 1.25578400  |
| H | 1.01626000  | -0.69543800 | 2.04729100  |
| C | 3.53957900  | -2.13523000 | 0.28705900  |

---

|   |            |             |             |
|---|------------|-------------|-------------|
| H | 3.26566100 | -3.29091000 | -1.52829100 |
| H | 3.51825300 | -0.96116900 | 2.08233500  |
| H | 4.60270100 | -2.34679600 | 0.34759500  |
| C | 1.97757100 | 2.06427700  | -0.22024900 |
| F | 2.73043000 | 2.85518300  | 0.57883100  |
| F | 1.33956400 | 2.92917300  | -1.05800100 |
| F | 2.83839400 | 1.36213800  | -0.99099100 |

**9a-S0**

Sum of electronic and thermal Free Energies = -990.512294

|   |             |             |             |
|---|-------------|-------------|-------------|
| C | 4.74710900  | 1.08301300  | 0.36321100  |
| C | 3.35804600  | 1.12414000  | 0.39561800  |
| C | 2.61031700  | -0.01075400 | 0.04989900  |
| C | 3.27553400  | -1.18636100 | -0.31806500 |
| C | 4.66874300  | -1.22201600 | -0.34792100 |
| C | 5.40800700  | -0.09022000 | -0.00953200 |
| H | 5.31680100  | 1.96723900  | 0.63219800  |
| H | 2.85325400  | 2.03869400  | 0.69303000  |
| H | 2.70231700  | -2.06929300 | -0.58032100 |
| H | 5.17556000  | -2.13808000 | -0.63577800 |
| H | 6.49310500  | -0.11992800 | -0.03218100 |
| C | 1.14376900  | 0.03665900  | 0.06132100  |
| C | 0.29212400  | 1.04581600  | 0.29501000  |
| H | 0.54975000  | 2.07355400  | 0.51016600  |
| O | 0.50564500  | -1.14541500 | -0.23209700 |
| C | -1.09637700 | 0.52669800  | 0.21448500  |
| C | -0.88082200 | -0.94463900 | -0.10992600 |
| C | -1.42705800 | -0.53721200 | 1.26316300  |
| C | -1.69663100 | -1.82054700 | -0.95622300 |
| C | -2.80743700 | -0.97627400 | 1.53400800  |
| H | -0.74529700 | -0.51720100 | 2.10934300  |
| C | -2.95711800 | -2.13526300 | -0.61165800 |



---

|   |             |             |             |
|---|-------------|-------------|-------------|
| H | -1.21995500 | -2.21981900 | -1.84633300 |
| C | -3.53411200 | -1.67988500 | 0.64347500  |
| H | -3.20533000 | -0.75957500 | 2.52128300  |
| H | -3.54802100 | -2.77942200 | -1.25515100 |
| H | -4.54631400 | -1.98402300 | 0.89115600  |
| C | -2.15174600 | 1.43752900  | -0.33664900 |
| F | -3.12629800 | 0.82697900  | -0.99150800 |
| F | -1.63806000 | 2.33011400  | -1.18348200 |
| F | -2.74509900 | 2.15035800  | 0.62699800  |

**TS4-S0**

Sum of electronic and thermal Free Energies = -990.504647

|   |             |             |             |
|---|-------------|-------------|-------------|
| C | 4.64251900  | -1.26681300 | -0.32515500 |
| C | 3.24918500  | -1.22620600 | -0.30485100 |
| C | 2.58820000  | -0.04525600 | 0.05231800  |
| C | 3.33604100  | 1.09262100  | 0.38641400  |
| C | 4.72504200  | 1.04536700  | 0.36580200  |
| C | 5.38285400  | -0.13486300 | 0.00999700  |
| H | 5.14824600  | -2.18651100 | -0.60273700 |
| H | 2.67507600  | -2.10971000 | -0.56309900 |
| H | 2.83055000  | 2.01486500  | 0.65746000  |
| H | 5.29679300  | 1.93106400  | 0.62499900  |
| H | 6.46794500  | -0.16863800 | -0.00609400 |
| C | 1.12242900  | 0.00730400  | 0.07514100  |
| C | 0.26767300  | 0.95950400  | 0.47269600  |
| H | 0.51219900  | 1.93072700  | 0.87947500  |
| O | 0.47605200  | -1.12766700 | -0.36555700 |
| C | -1.12993000 | 0.43886300  | 0.30142300  |
| C | -0.88658100 | -0.91445900 | -0.24993100 |
| C | -1.59402500 | -0.42409400 | 1.44289600  |
| C | -1.75154100 | -1.77048500 | -0.96183100 |
| C | -2.86268300 | -1.02497500 | 1.60167200  |

---

|   |             |             |             |
|---|-------------|-------------|-------------|
| H | -0.93604900 | -0.38437500 | 2.30647000  |
| C | -3.07569100 | -1.96841400 | -0.63689000 |
| H | -1.29035400 | -2.35137800 | -1.75574800 |
| C | -3.62883900 | -1.59642700 | 0.60605100  |
| H | -3.19438700 | -1.13943100 | 2.63169000  |
| H | -3.67259900 | -2.58931700 | -1.29852300 |
| H | -4.62363200 | -1.95474100 | 0.85282500  |
| C | -2.05002300 | 1.43787100  | -0.36309800 |
| F | -3.29526500 | 1.00253400  | -0.57537100 |
| F | -1.55935400 | 1.82199900  | -1.55699400 |
| F | -2.14871100 | 2.55008300  | 0.39479000  |

**2a-S0**

Sum of electronic and thermal Free Energies = -990.524567

|   |             |             |             |
|---|-------------|-------------|-------------|
| C | 4.68521300  | 0.90197600  | 0.70501100  |
| C | 3.29588400  | 0.93318500  | 0.73530500  |
| C | 2.55563300  | -0.09092700 | 0.12792000  |
| C | 3.22519700  | -1.14426200 | -0.50557500 |
| C | 4.61868200  | -1.16954600 | -0.53319100 |
| C | 5.35128700  | -0.14929800 | 0.07008400  |
| H | 5.25074700  | 1.69847500  | 1.17854000  |
| H | 2.78582800  | 1.75221200  | 1.23370100  |
| H | 2.65722400  | -1.93948300 | -0.97634700 |
| H | 5.13026000  | -1.98933900 | -1.02789800 |
| H | 6.43659600  | -0.17077000 | 0.04800700  |
| C | 1.08927900  | -0.05352900 | 0.15430800  |
| C | 0.22418600  | 0.84599100  | 0.63720800  |
| H | 0.45888000  | 1.78275300  | 1.12310400  |
| O | 0.45921100  | -1.14620000 | -0.40593400 |
| C | -1.18315000 | 0.36720700  | 0.35891300  |
| C | -0.89482400 | -0.99913600 | -0.23417100 |
| C | -2.03201500 | 0.24766700  | 1.60687400  |

---

|   |             |             |             |
|---|-------------|-------------|-------------|
| C | -1.74010500 | -1.99086600 | -0.56440400 |
| C | -3.16781700 | -0.47097400 | 1.71509500  |
| H | -1.67777600 | 0.80879500  | 2.46765700  |
| C | -3.14983800 | -2.02661600 | -0.25359800 |
| H | -1.31279800 | -2.85221100 | -1.07167100 |
| C | -3.77935900 | -1.35847000 | 0.74604400  |
| H | -3.69671700 | -0.38744000 | 2.66303500  |
| H | -3.73838300 | -2.73863700 | -0.82666600 |
| H | -4.83208500 | -1.57679300 | 0.90563000  |
| C | -1.82742800 | 1.30713100  | -0.66918300 |
| F | -3.06255700 | 0.93467500  | -1.03525900 |
| F | -1.09620100 | 1.38529900  | -1.79643100 |
| F | -1.92573300 | 2.55612000  | -0.17380500 |

**5a**

Sum of electronic and thermal Free Energies = -1107.181972

|   |             |             |             |
|---|-------------|-------------|-------------|
| C | -1.75928800 | 0.01016200  | 1.05306400  |
| O | -1.23272700 | -0.33748800 | 2.09569500  |
| C | -2.74817500 | -0.85215100 | 0.34408900  |
| C | -3.16566100 | -0.55749200 | -0.95884000 |
| C | -3.24276100 | -1.98932000 | 0.99537500  |
| C | -4.07186300 | -1.39568800 | -1.60596200 |
| H | -2.77764200 | 0.31566000  | -1.47576100 |
| C | -4.15273200 | -2.81897900 | 0.35050200  |
| H | -2.90788500 | -2.20717600 | 2.00475600  |
| C | -4.56697000 | -2.52268500 | -0.95102100 |
| H | -4.38939700 | -1.16937100 | -2.61889000 |
| H | -4.54033600 | -3.69693900 | 0.85774700  |
| H | -5.27639200 | -3.17299200 | -1.45410700 |
| C | -1.44265100 | 1.34805100  | 0.45177700  |
| H | -2.28137400 | 1.98360100  | 0.17768700  |

---

|   |             |             |             |
|---|-------------|-------------|-------------|
| C | -0.18517900 | 1.75087100  | 0.25872900  |
| C | 1.03000400  | 0.92242500  | 0.52781000  |
| C | 1.37548000  | 0.01361500  | -0.39989400 |
| H | 0.78606000  | -0.02381300 | -1.31627500 |
| C | 0.06460200  | 3.10614200  | -0.35277800 |
| F | 0.57516000  | 2.99000500  | -1.59617200 |
| F | 0.95699400  | 3.82336200  | 0.35709100  |
| F | -1.04344200 | 3.85712600  | -0.45953600 |
| C | 2.49886700  | -0.94303800 | -0.33636900 |
| C | 3.21021400  | -1.23320000 | -1.51073900 |
| C | 2.85214800  | -1.61204500 | 0.84468600  |
| C | 4.27006000  | -2.13614100 | -1.49851700 |
| H | 2.92990400  | -0.73708900 | -2.43675300 |
| C | 3.90780400  | -2.52252700 | 0.85507800  |
| H | 2.28144300  | -1.44014700 | 1.75236100  |
| C | 4.62495700  | -2.78169800 | -0.31281300 |
| H | 4.81572000  | -2.34066500 | -2.41494800 |
| H | 4.16432400  | -3.03658900 | 1.77673200  |
| H | 5.44791500  | -3.49007700 | -0.30215900 |
| C | 1.74506200  | 1.19411400  | 1.82541400  |
| H | 1.70804400  | 2.25885300  | 2.07028200  |
| H | 1.24851200  | 0.65736300  | 2.64182100  |
| H | 2.79099800  | 0.88235900  | 1.78195900  |

**5a-T1**

Sum of electronic and thermal Free Energies = -1107.116127

|   |             |             |             |
|---|-------------|-------------|-------------|
| C | -1.39489300 | -0.23770700 | 0.45233600  |
| O | -0.52131800 | -0.83367900 | 1.10040400  |
| C | -2.72328600 | -0.88569400 | 0.20552100  |
| C | -3.57486700 | -0.48221300 | -0.83040900 |
| C | -3.10438300 | -1.94997300 | 1.03213400  |

---

|   |             |             |             |
|---|-------------|-------------|-------------|
| C | -4.79282400 | -1.13034500 | -1.02981000 |
| H | -3.28575300 | 0.32236600  | -1.50031700 |
| C | -4.32401500 | -2.59058500 | 0.83695600  |
| H | -2.43479000 | -2.26172000 | 1.82764300  |
| C | -5.17138300 | -2.18127500 | -0.19484100 |
| H | -5.44310100 | -0.81687600 | -1.84074600 |
| H | -4.61529200 | -3.40915500 | 1.48811700  |
| H | -6.12210800 | -2.68276000 | -0.34938800 |
| C | -1.17452900 | 1.10140200  | -0.04554900 |
| H | -2.04624300 | 1.68424600  | -0.32026700 |
| C | 0.10306500  | 1.75545900  | -0.06553200 |
| C | 1.32402900  | 1.14062300  | -0.26368300 |
| C | 1.38759700  | -0.25852900 | -0.66168900 |
| H | 0.57385100  | -0.62260000 | -1.28266600 |
| C | 0.05840600  | 3.25897600  | 0.05132100  |
| F | 0.42641000  | 3.89319200  | -1.08829100 |
| F | 0.87048200  | 3.73592300  | 1.01862200  |
| F | -1.17446600 | 3.71458300  | 0.34121900  |
| C | 2.43197300  | -1.18931800 | -0.37694400 |
| C | 2.47058700  | -2.40616900 | -1.10361600 |
| C | 3.40629800  | -0.99123400 | 0.63265900  |
| C | 3.45153000  | -3.35521600 | -0.85991100 |
| H | 1.71797200  | -2.58456400 | -1.86727300 |
| C | 4.38074800  | -1.95008400 | 0.87422100  |
| H | 3.37552900  | -0.09792100 | 1.24734600  |
| C | 4.41716200  | -3.13158100 | 0.12740800  |
| H | 3.46560400  | -4.27559500 | -1.43590200 |
| H | 5.11329600  | -1.78226100 | 1.65809800  |
| H | 5.18358100  | -3.87566500 | 0.32044900  |
| C | 2.61771300  | 1.91921900  | -0.21453700 |
| H | 2.51874400  | 2.89233200  | -0.69921400 |

---

|   |            |            |             |
|---|------------|------------|-------------|
| H | 2.91740000 | 2.10184900 | 0.82356900  |
| H | 3.41645600 | 1.36993700 | -0.71283300 |

**1-TS1-T1**

Sum of electronic and thermal Free Energies = -1107.098157

|   |             |             |             |
|---|-------------|-------------|-------------|
| C | -1.41779500 | -0.11142100 | 0.11209400  |
| O | -0.35266800 | -0.57273900 | 0.69581900  |
| C | -2.60381800 | -0.98084700 | 0.02510400  |
| C | -3.77276900 | -0.58331800 | -0.64667500 |
| C | -2.57027300 | -2.24516500 | 0.63581700  |
| C | -4.87649800 | -1.42829800 | -0.69753800 |
| H | -3.82495700 | 0.38257400  | -1.13861300 |
| C | -3.67836900 | -3.08573600 | 0.58293500  |
| H | -1.66757200 | -2.55750600 | 1.15053900  |
| C | -4.83628900 | -2.68191900 | -0.08280900 |
| H | -5.77165900 | -1.10822300 | -1.22233000 |
| H | -3.63741800 | -4.05951300 | 1.06184300  |
| H | -5.70013600 | -3.33828600 | -0.12523400 |
| C | -1.35632400 | 1.21627100  | -0.35911800 |
| H | -2.20772400 | 1.73751300  | -0.77889400 |
| C | -0.14172900 | 1.83717100  | -0.11831300 |
| C | 0.97149100  | 0.99257100  | 0.32440000  |
| C | 1.55946900  | 0.12706700  | -0.64066600 |
| H | 1.19676600  | 0.22619600  | -1.66129500 |
| C | -0.02539300 | 3.31542600  | -0.10006000 |
| F | 1.20056700  | 3.74528100  | -0.48011300 |
| F | -0.23262400 | 3.87384800  | 1.12498100  |
| F | -0.91807000 | 3.90248500  | -0.92077800 |
| C | 2.53620400  | -0.90742100 | -0.40753300 |
| C | 3.27094300  | -1.38880600 | -1.51252100 |
| C | 2.76005800  | -1.49390700 | 0.85692300  |

---

|   |            |             |             |
|---|------------|-------------|-------------|
| C | 4.22837100 | -2.38200300 | -1.35234200 |
| H | 3.08615300 | -0.96193700 | -2.49482600 |
| C | 3.70866000 | -2.49755600 | 1.00745600  |
| H | 2.15840700 | -1.19134000 | 1.70717400  |
| C | 4.45397400 | -2.93701100 | -0.09033900 |
| H | 4.79417600 | -2.73091100 | -2.21062400 |
| H | 3.86223800 | -2.94874700 | 1.98294100  |
| H | 5.19660100 | -3.71904800 | 0.03523200  |
| C | 1.68196700 | 1.36113000  | 1.59873500  |
| H | 1.67360700 | 2.44686700  | 1.72883800  |
| H | 1.14652000 | 0.93568800  | 2.45412800  |
| H | 2.71619800 | 1.01667400  | 1.61445700  |

**10a-T1**

Sum of electronic and thermal Free Energies = -1107.129403

|   |             |             |             |
|---|-------------|-------------|-------------|
| C | -1.50617500 | 0.24408000  | 0.03376600  |
| O | -0.37576000 | -0.28030900 | 0.56543500  |
| C | -2.66965800 | -0.60463500 | -0.05591800 |
| C | -3.89243300 | -0.10088200 | -0.54262900 |
| C | -2.59674200 | -1.95232900 | 0.34457400  |
| C | -5.00548700 | -0.92643400 | -0.62629800 |
| H | -3.96779600 | 0.93734500  | -0.85179500 |
| C | -3.71853900 | -2.77009200 | 0.25712700  |
| H | -1.65792300 | -2.34884500 | 0.71733100  |
| C | -4.92596900 | -2.26444700 | -0.22740300 |
| H | -5.94190500 | -0.52635500 | -1.00300400 |
| H | -3.64959900 | -3.80838200 | 0.56739000  |
| H | -5.79915700 | -2.90589200 | -0.29420800 |
| C | -1.31253800 | 1.58315000  | -0.33219900 |
| H | -2.06689400 | 2.23213000  | -0.75720800 |
| C | -0.01400700 | 1.91516600  | -0.04730200 |

---

|   |             |             |             |
|---|-------------|-------------|-------------|
| C | 0.69643700  | 0.71200100  | 0.53794300  |
| C | 1.81388000  | 0.21130500  | -0.34303000 |
| H | 2.22073700  | 0.91680100  | -1.06010200 |
| C | 0.56746500  | 3.26845500  | -0.13836500 |
| F | 1.83455100  | 3.26911300  | -0.61309400 |
| F | 0.63973300  | 3.89732400  | 1.06459400  |
| F | -0.15348800 | 4.07642200  | -0.93760900 |
| C | 2.42447200  | -1.07170000 | -0.26049500 |
| C | 3.52569900  | -1.35206400 | -1.11364200 |
| C | 1.99959300  | -2.10173900 | 0.62064500  |
| C | 4.16537600  | -2.58118700 | -1.08393200 |
| H | 3.86565900  | -0.57871100 | -1.79768100 |
| C | 2.64985000  | -3.32810100 | 0.64344700  |
| H | 1.15163800  | -1.93666500 | 1.27565400  |
| C | 3.73376500  | -3.57977200 | -0.20359800 |
| H | 5.00515100  | -2.76687400 | -1.74707200 |
| H | 2.30695500  | -4.10016900 | 1.32609300  |
| H | 4.23469200  | -4.54243600 | -0.17967400 |
| C | 1.16166800  | 0.94436900  | 1.98167700  |
| H | 1.94712700  | 1.70550600  | 1.99379100  |
| H | 0.32182200  | 1.28629200  | 2.59322900  |
| H | 1.56847900  | 0.02213000  | 2.40254100  |

**1-TS2-T1**

Sum of electronic and thermal Free Energies = -1107.066937

|   |             |             |             |
|---|-------------|-------------|-------------|
| C | -1.88487300 | -0.02514400 | -0.07575300 |
| O | -1.02473600 | -1.08131400 | -0.05834600 |
| C | -3.29298800 | -0.37965000 | -0.07474900 |
| C | -4.29343800 | 0.59369500  | -0.26681800 |
| C | -3.68140800 | -1.71872300 | 0.11904300  |
| C | -5.63499900 | 0.23516200  | -0.25675900 |



---

|   |             |             |             |
|---|-------------|-------------|-------------|
| H | -4.02476600 | 1.63204600  | -0.43088600 |
| C | -5.02811500 | -2.06857800 | 0.12464600  |
| H | -2.92216000 | -2.47846200 | 0.26809400  |
| C | -6.01138500 | -1.09665200 | -0.06120400 |
| H | -6.39269900 | 0.99832400  | -0.40610400 |
| H | -5.31014800 | -3.10603900 | 0.27681200  |
| H | -7.06142000 | -1.37190500 | -0.05578900 |
| C | -1.32769500 | 1.25373100  | -0.15900200 |
| H | -1.97587300 | 2.12749100  | -0.20175000 |
| C | 0.02817800  | 1.37452300  | -0.18822100 |
| C | 0.28093800  | -0.84874800 | 0.37623400  |
| C | 1.24948300  | -1.24567300 | -0.49539100 |
| H | 0.90756800  | -1.57122700 | -1.47554200 |
| C | 0.90372600  | 2.54551700  | -0.17116300 |
| F | 0.25567300  | 3.69725500  | -0.47544800 |
| F | 1.92617300  | 2.44084600  | -1.04861500 |
| F | 1.48119900  | 2.75383500  | 1.04022900  |
| C | 2.69101000  | -1.25817900 | -0.26882300 |
| C | 3.48378500  | -2.08388900 | -1.08772300 |
| C | 3.33288000  | -0.46209600 | 0.69681400  |
| C | 4.86305800  | -2.14389500 | -0.92167900 |
| H | 3.00213800  | -2.68638200 | -1.85361900 |
| C | 4.71542600  | -0.51836300 | 0.85504600  |
| H | 2.75892700  | 0.22881300  | 1.30496300  |
| C | 5.48495200  | -1.36368800 | 0.05511200  |
| H | 5.45501300  | -2.79511800 | -1.55781100 |
| H | 5.19404800  | 0.10975200  | 1.60041700  |
| H | 6.56232500  | -1.40474100 | 0.18316000  |
| C | 0.41066600  | -0.65524000 | 1.86922000  |
| H | 0.71176600  | 0.35535100  | 2.15182000  |
| H | -0.55680000 | -0.86153400 | 2.33452900  |

---

H 1.14736300 -1.35793200 2.27000400

**11a-T1**

Sum of electronic and thermal Free Energies = -1107.071332

C -1.78008800 -0.11744700 -0.16727100  
O -0.91733900 -1.14664600 -0.37354400  
C -3.18029300 -0.52403800 -0.09598100  
C -4.22866200 0.39807500 -0.27626300  
C -3.50065500 -1.87086500 0.15430600  
C -5.55248000 -0.01433400 -0.18450800  
H -4.01386400 1.43575600 -0.51039900  
C -4.82880500 -2.27620000 0.24193800  
H -2.70210300 -2.59262200 0.28730000  
C -5.86033900 -1.35153400 0.07734100  
H -6.34875700 0.70941800 -0.32876400  
H -5.05823700 -3.31841800 0.44197700  
H -6.89603700 -1.66968000 0.14549300  
C -1.33284900 1.20451000 -0.10057900  
H -2.07666600 1.97380400 0.10699200  
C -0.04218100 1.60748300 -0.26902400  
C 0.36638900 -1.08320800 0.17109400  
C 1.38024200 -1.27207200 -0.68390200  
H 1.11961200 -1.43699700 -1.72759000  
C 0.61461200 2.90900500 -0.12720800  
F -0.26831700 3.93309300 -0.09575500  
F 1.47113500 3.16462000 -1.13754300  
F 1.34454200 3.00396800 1.01044200  
C 2.81244700 -1.28913200 -0.34150800  
C 3.66967900 -2.16417700 -1.02694600  
C 3.36427500 -0.42279500 0.61462600  
C 5.03120500 -2.20072200 -0.73810300

---

|   |             |             |             |
|---|-------------|-------------|-------------|
| H | 3.25751200  | -2.82381000 | -1.78642700 |
| C | 4.72790600  | -0.45780900 | 0.90142000  |
| H | 2.72874100  | 0.30226900  | 1.11607900  |
| C | 5.56473700  | -1.35075000 | 0.23222400  |
| H | 5.67732300  | -2.89065800 | -1.27284200 |
| H | 5.13826700  | 0.22350900  | 1.64088700  |
| H | 6.62710800  | -1.37527800 | 0.45525200  |
| C | 0.40032300  | -0.96502600 | 1.66473800  |
| H | 0.34341400  | 0.07440400  | 2.00425900  |
| H | -0.45541400 | -1.50388400 | 2.08412400  |
| H | 1.31879900  | -1.40356100 | 2.05934300  |

**1-TS3-T1**

Sum of electronic and thermal Free Energies = -1107.064742

|   |             |             |             |
|---|-------------|-------------|-------------|
| C | -1.78474600 | -0.12244800 | 0.15068200  |
| O | -1.21838200 | -1.33216300 | 0.42735800  |
| C | -3.22457000 | -0.21007200 | -0.06830000 |
| C | -3.97067600 | 0.90274000  | -0.50399000 |
| C | -3.89973700 | -1.42680800 | 0.14783400  |
| C | -5.34250800 | 0.80151900  | -0.69873100 |
| H | -3.48167300 | 1.84846600  | -0.71076600 |
| C | -5.27337100 | -1.51952200 | -0.05163400 |
| H | -3.34381500 | -2.29646100 | 0.47876000  |
| C | -6.00345900 | -0.40801100 | -0.47249300 |
| H | -5.89798900 | 1.67080400  | -1.03718000 |
| H | -5.77559300 | -2.46595500 | 0.12458000  |
| H | -7.07514100 | -0.48290400 | -0.62848100 |
| C | -1.04631800 | 1.06789900  | 0.17614100  |
| H | -1.60867700 | 1.99533700  | 0.07942600  |
| C | 0.31152500  | 1.11883900  | 0.31460200  |
| C | 0.14560900  | -1.50107400 | 0.51434800  |

---

|   |             |             |             |
|---|-------------|-------------|-------------|
| C | 0.94749000  | -0.91847100 | -0.42102000 |
| H | 0.48176500  | -0.60218000 | -1.35231000 |
| C | 1.16496200  | 2.31145200  | 0.25065400  |
| F | 2.00223800  | 2.28602200  | -0.81404800 |
| F | 1.95848700  | 2.44664000  | 1.33981200  |
| F | 0.47196000  | 3.47627500  | 0.15250900  |
| C | 2.42204800  | -0.98483600 | -0.41993600 |
| C | 3.09679800  | -1.22964100 | -1.62376300 |
| C | 3.17236200  | -0.76083000 | 0.74261500  |
| C | 4.48814300  | -1.28772000 | -1.65795100 |
| H | 2.52344100  | -1.37982300 | -2.53502600 |
| C | 4.56403600  | -0.81646100 | 0.70733000  |
| H | 2.66367400  | -0.51680000 | 1.67170200  |
| C | 5.22617100  | -1.08547600 | -0.49111300 |
| H | 4.99622300  | -1.48560500 | -2.59706100 |
| H | 5.13209500  | -0.63600500 | 1.61508200  |
| H | 6.31094800  | -1.12452400 | -0.51782200 |
| C | 0.52490100  | -2.30187400 | 1.70939000  |
| H | 1.53121000  | -2.71042900 | 1.61386900  |
| H | 0.47313900  | -1.68882500 | 2.61816200  |
| H | -0.18867500 | -3.12344000 | 1.82576100  |

**6a-T1**

Sum of electronic and thermal Free Energies = -1107.082469

|   |             |             |             |
|---|-------------|-------------|-------------|
| C | -1.87894500 | 0.18123600  | 0.26864600  |
| O | -1.17791700 | -0.43264300 | 1.26316200  |
| C | -3.17958900 | -0.20049500 | -0.03796000 |
| C | -3.89443800 | 0.47375200  | -1.07911400 |
| C | -3.84520000 | -1.25989100 | 0.65890700  |
| C | -5.18258800 | 0.09008500  | -1.40631700 |
| H | -3.41547300 | 1.28993600  | -1.61231400 |

---

|   |             |             |             |
|---|-------------|-------------|-------------|
| C | -5.13516700 | -1.61464200 | 0.31745400  |
| H | -3.32223000 | -1.78146300 | 1.45391500  |
| C | -5.82039300 | -0.95119200 | -0.71614800 |
| H | -5.70651900 | 0.60925900  | -2.20389600 |
| H | -5.62558200 | -2.42124400 | 0.85529600  |
| H | -6.83434700 | -1.23912500 | -0.97349600 |
| C | -1.02361100 | 1.22397900  | -0.37303000 |
| H | -1.34983800 | 2.24932500  | -0.51656200 |
| C | 0.34919800  | 0.90162000  | 0.03473100  |
| C | 0.21463400  | -0.15569800 | 1.12136800  |
| C | 0.78309700  | -0.56795400 | -0.19679900 |
| H | 0.07613700  | -1.08875400 | -0.84310400 |
| C | 1.31646800  | 2.03697700  | 0.13088800  |
| F | 1.54466900  | 2.60035200  | -1.07359100 |
| F | 2.51067700  | 1.68902400  | 0.63309300  |
| F | 0.83656700  | 3.01982400  | 0.92218800  |
| C | 2.20738800  | -0.98452200 | -0.39506300 |
| C | 2.95080900  | -0.48131300 | -1.46792200 |
| C | 2.78217800  | -1.94462100 | 0.44271200  |
| C | 4.25425100  | -0.91969800 | -1.68987700 |
| H | 2.50639000  | 0.25954200  | -2.12795900 |
| C | 4.08700900  | -2.38484200 | 0.21995800  |
| H | 2.20517200  | -2.35312900 | 1.26799100  |
| C | 4.82688300  | -1.87103000 | -0.84412400 |
| H | 4.82311600  | -0.51777500 | -2.52291000 |
| H | 4.52327900  | -3.13009000 | 0.87831000  |
| H | 5.84358000  | -2.21135100 | -1.01581500 |
| C | 0.92125600  | -0.15556500 | 2.44267000  |
| H | 1.99340600  | -0.00239400 | 2.31864400  |
| H | 0.51678500  | 0.63698000  | 3.07838900  |
| H | 0.76280100  | -1.11849700 | 2.93711600  |

**1-TS2'-diradical**

Sum of electronic and thermal Free Energies= -1107.080682

|   |             |             |             |
|---|-------------|-------------|-------------|
| C | 0.53485400  | -1.08464400 | 0.10836900  |
| O | 0.03156400  | -0.88877000 | 1.36264000  |
| C | 1.90227200  | -1.25719200 | -0.07752700 |
| C | 2.43952300  | -1.48016800 | -1.38640700 |
| C | 2.81798000  | -1.19113000 | 1.02249100  |
| C | 3.80273400  | -1.62041800 | -1.56823300 |
| H | 1.77100300  | -1.54022700 | -2.23991900 |
| C | 4.17509500  | -1.33618800 | 0.81081500  |
| H | 2.43222100  | -1.02722400 | 2.02364300  |
| C | 4.68793500  | -1.55186300 | -0.48042700 |
| H | 4.19103700  | -1.78699400 | -2.56911900 |
| H | 4.85450200  | -1.28214900 | 1.65706200  |
| H | 5.75589700  | -1.66573500 | -0.63426900 |
| C | -0.57057700 | -1.01507900 | -0.86431500 |
| H | -0.49154100 | -1.17618600 | -1.92943100 |
| C | -1.69558900 | -0.58774700 | -0.15917900 |
| C | -1.31999900 | -0.44447400 | 1.29107600  |
| C | -1.47893100 | 0.94731500  | 0.79597700  |
| H | -2.47538400 | 1.36400400  | 0.91435800  |
| C | -3.08043200 | -0.79151400 | -0.67634900 |
| F | -4.01571800 | -0.07931400 | -0.02184700 |
| F | -3.45755200 | -2.08432700 | -0.57912800 |
| F | -3.17354100 | -0.46154300 | -1.97735500 |
| C | -0.40169000 | 1.86775100  | 0.40460500  |
| C | -0.61451400 | 2.72983100  | -0.68371800 |
| C | 0.82289800  | 1.93230500  | 1.09009200  |
| C | 0.37061900  | 3.63028000  | -1.07926400 |
| H | -1.55793000 | 2.68118700  | -1.22235700 |

---

|   |             |             |             |
|---|-------------|-------------|-------------|
| C | 1.80566900  | 2.83494300  | 0.69144100  |
| H | 0.99963800  | 1.27961200  | 1.93887000  |
| C | 1.58542600  | 3.68462600  | -0.39385200 |
| H | 0.19156700  | 4.28733400  | -1.92509900 |
| H | 2.74648000  | 2.87417200  | 1.23241800  |
| H | 2.35504400  | 4.38548200  | -0.70252500 |
| C | -2.14446600 | -0.98528700 | 2.42594500  |
| H | -3.17191500 | -0.62247900 | 2.35658800  |
| H | -2.14505400 | -2.07774200 | 2.40039200  |
| H | -1.71961800 | -0.64433600 | 3.37399100  |

**6a-S0**

Sum of electronic and thermal Free Energies= -1107.175655

|   |             |             |             |
|---|-------------|-------------|-------------|
| C | -1.82641100 | 0.03387100  | 0.00908200  |
| O | -1.15384900 | -0.84829600 | 0.81851100  |
| C | -3.25588100 | -0.24175300 | -0.18477800 |
| C | -4.03087000 | 0.58714900  | -1.00875200 |
| C | -3.86011400 | -1.32748200 | 0.46005300  |
| C | -5.38778200 | 0.33602600  | -1.17657700 |
| H | -3.57081400 | 1.42815500  | -1.51914400 |
| C | -5.22129600 | -1.57543400 | 0.28756100  |
| H | -3.26375600 | -1.97411000 | 1.09484000  |
| C | -5.98847700 | -0.74635500 | -0.52849100 |
| H | -5.97922700 | 0.98426400  | -1.81595700 |
| H | -5.68094900 | -2.41958300 | 0.79255700  |
| H | -7.04814800 | -0.94121400 | -0.66261300 |
| C | -1.04596600 | 1.01972600  | -0.46593600 |
| H | -1.35422300 | 1.84550700  | -1.09236700 |
| C | 0.34393100  | 0.77591200  | 0.00323900  |
| C | 0.21461100  | -0.47290000 | 0.85992300  |
| C | 0.94927000  | -0.55745700 | -0.44650900 |

|   |            |             |             |
|---|------------|-------------|-------------|
| H | 0.37808600 | -0.99733300 | -1.26309200 |
| C | 1.15210100 | 1.96694900  | 0.40355500  |
| F | 1.46538700 | 2.74346900  | -0.65755800 |
| F | 2.30847500 | 1.65575200  | 1.01198600  |
| F | 0.46847500 | 2.75860300  | 1.25662600  |
| C | 2.41981000 | -0.83848200 | -0.51763900 |
| C | 3.26283200 | -0.03742400 | -1.29479500 |
| C | 2.95241100 | -1.96373700 | 0.11983500  |
| C | 4.61622000 | -0.34567400 | -1.41991300 |
| H | 2.85649400 | 0.83404200  | -1.80192800 |
| C | 4.30621100 | -2.27488600 | -0.00509000 |
| H | 2.30228100 | -2.60046400 | 0.71429200  |
| C | 5.14212500 | -1.46430600 | -0.77270500 |
| H | 5.25967000 | 0.28822100  | -2.02277800 |
| H | 4.70663200 | -3.15057300 | 0.49710000  |
| H | 6.19692900 | -1.70395600 | -0.86807700 |
| C | 0.81763100 | -0.69801200 | 2.21526700  |
| H | 1.88080300 | -0.45702500 | 2.22275400  |
| H | 0.30603900 | -0.07614300 | 2.95549000  |
| H | 0.69781500 | -1.74821500 | 2.49737200  |



## 7. The structural determination of 2za and 2zd

## (1) The structural determination of 2za

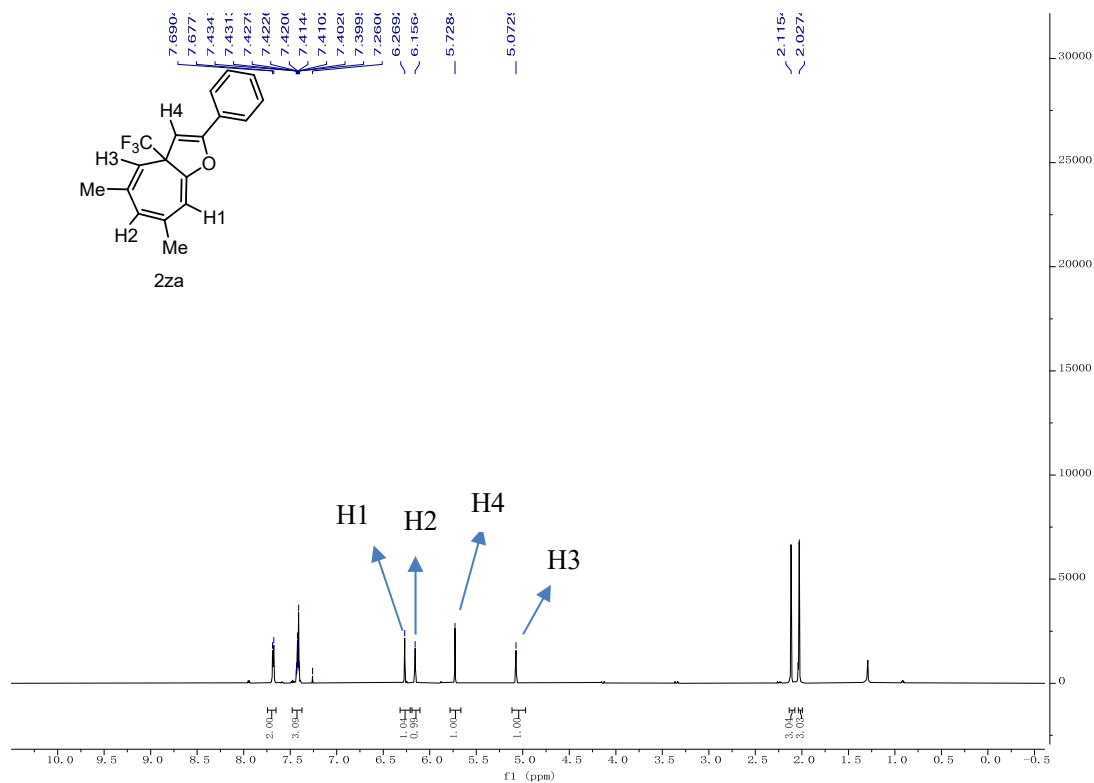

**Fig. S9.** The  $^1\text{H-NMR}$  of compound 2a after decoupling from F (400 MHz,  $\text{CDCl}_3$ ).

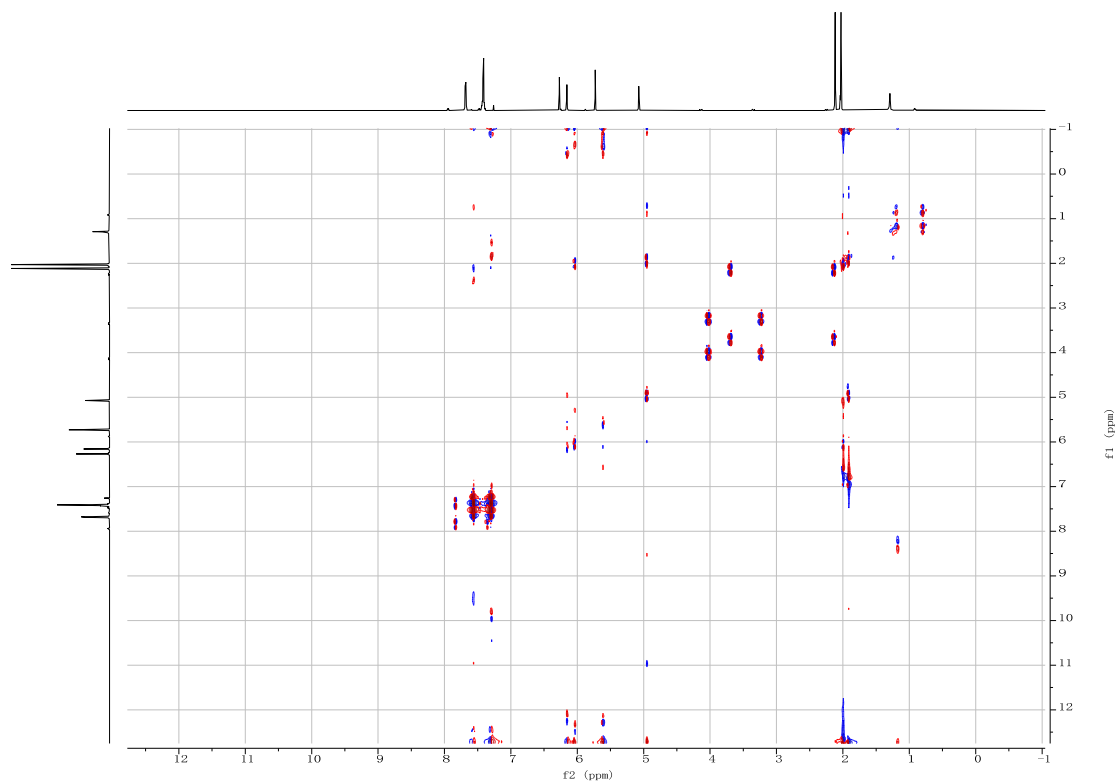

**Fig. S10.**  $^1\text{H-}^1\text{H}$  COSY of 2za (400 MHz,  $\text{CDCl}_3$ )

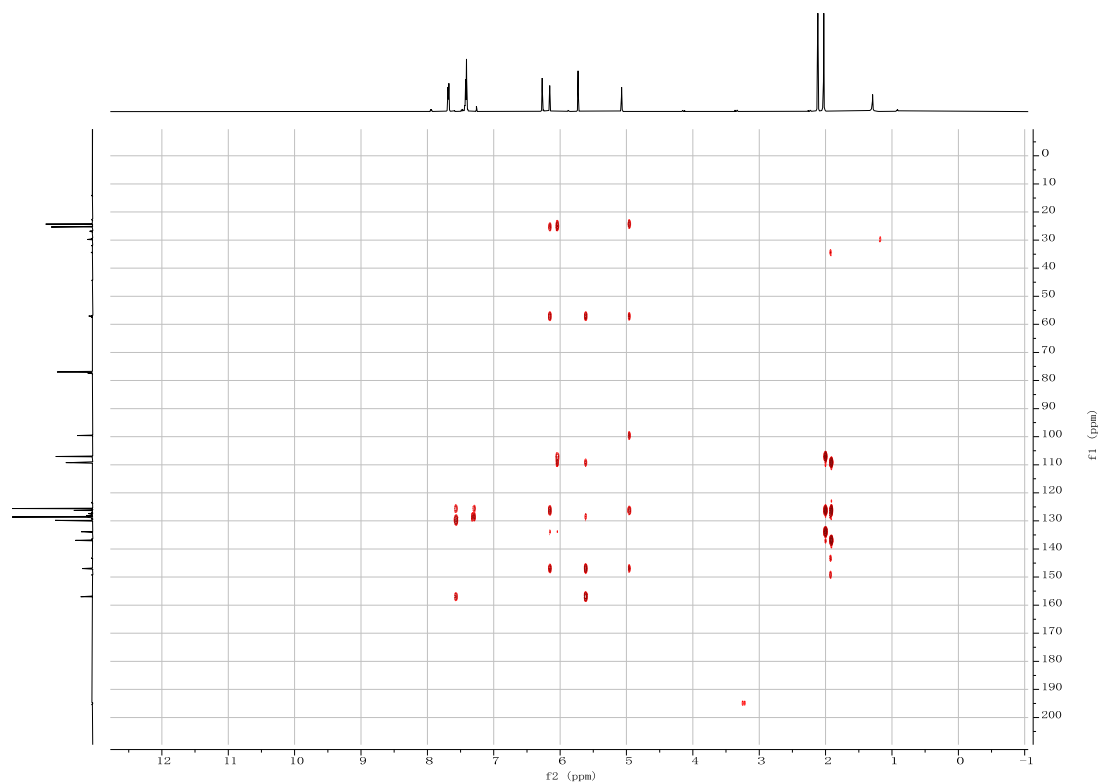

Fig. S11.  $^1\text{H}$ - $^{13}\text{C}$  HMBC of **2za** (400 MHz,  $\text{CDCl}_3$ )

(2) The structural determination of **2zd**

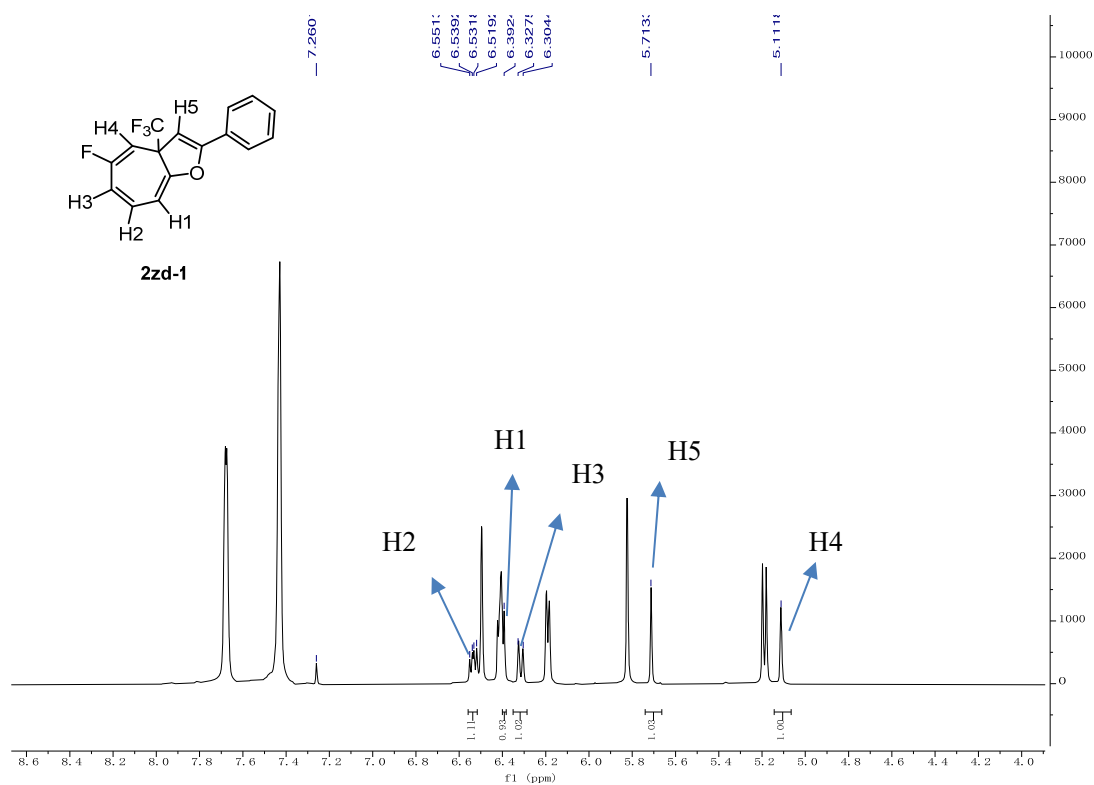

Fig. S12. The  $^1\text{H}$ -NMR of compound **2zd-1** after decoupling from F (400 MHz,  $\text{CDCl}_3$ ).

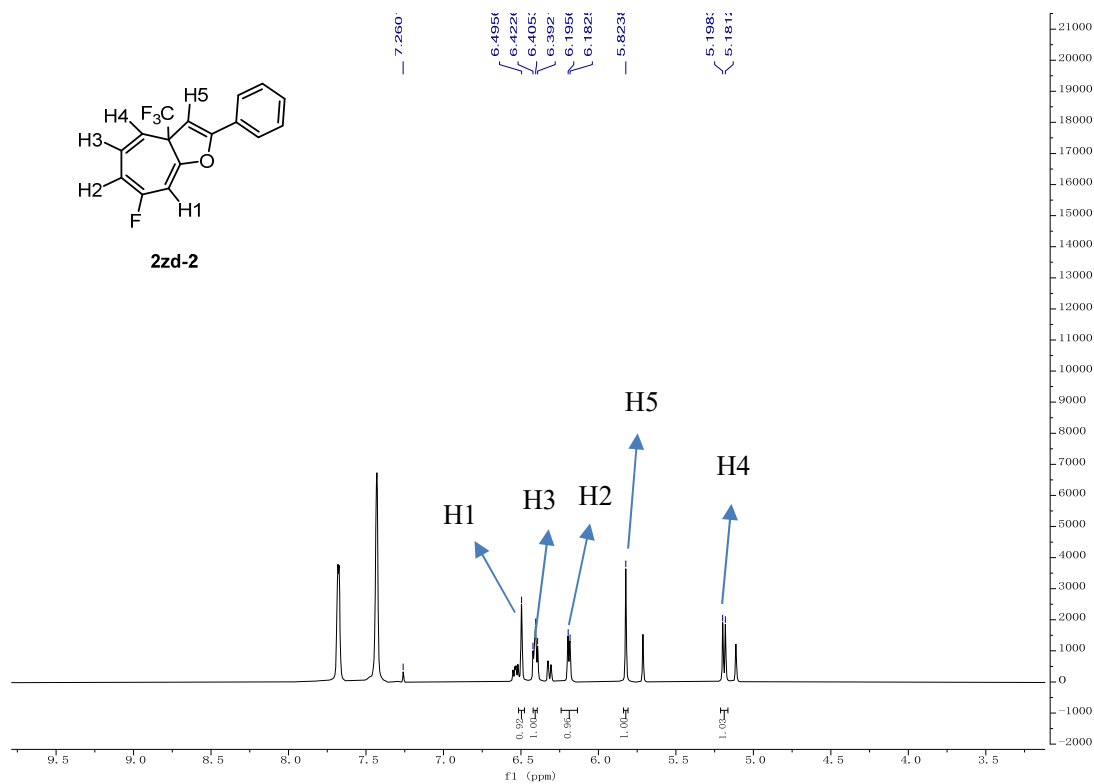

**Fig. S13.** The  $^1\text{H}$ -NMR of compound **2zd-2** after decoupling from F (400 MHz,  $\text{CDCl}_3$ ).

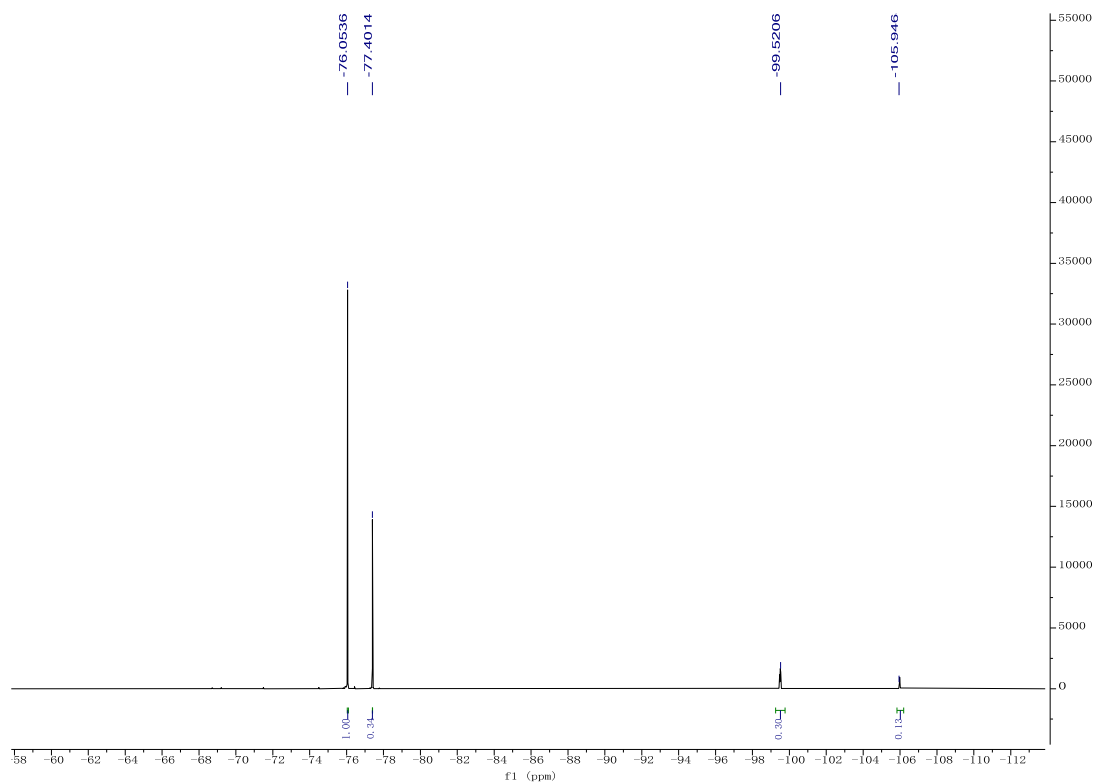

**Fig. S14.**  $^{19}\text{F}$  NMR (565 MHz,  $\text{CDCl}_3$ ) of **2zd**.

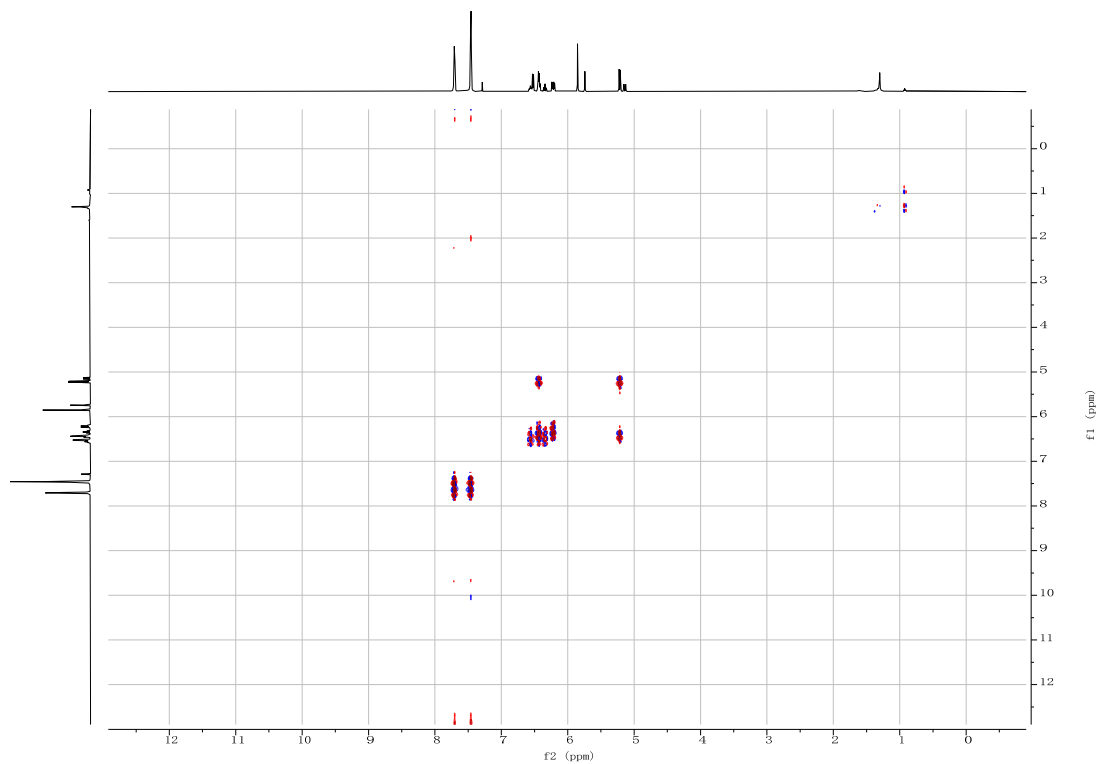

**Fig. S15.**  $^1\text{H}$ - $^1\text{H}$  COSY of **2zd** (400 MHz,  $\text{CDCl}_3$ )

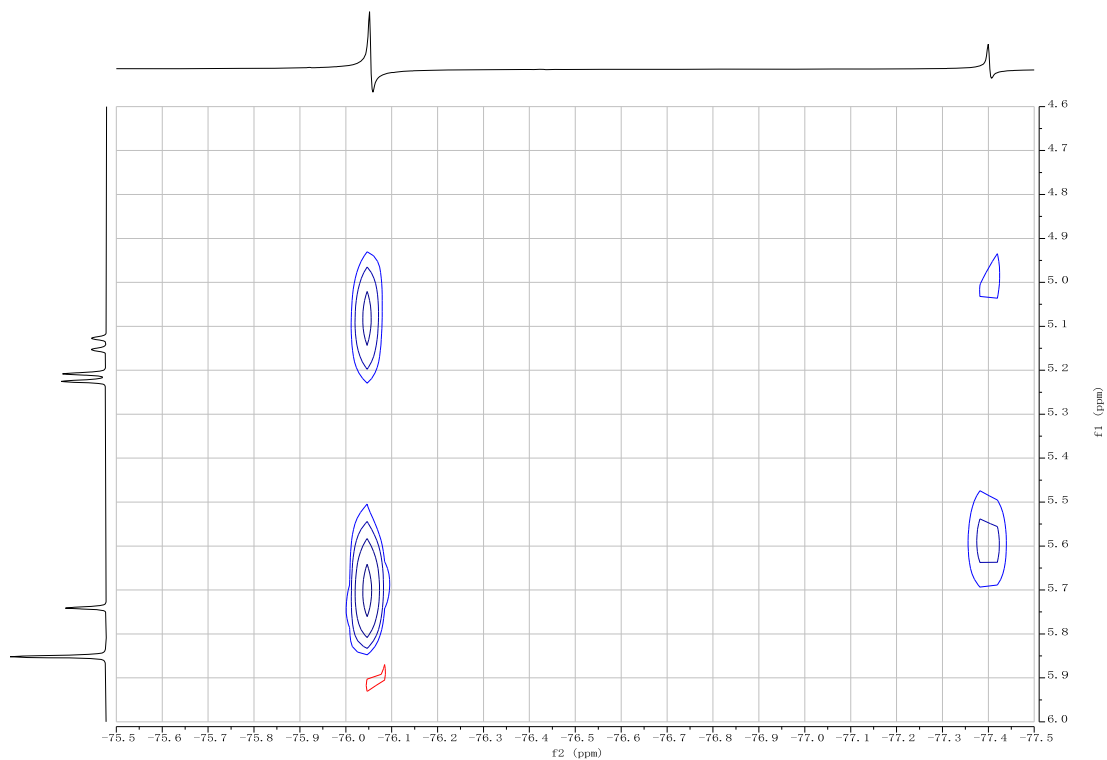

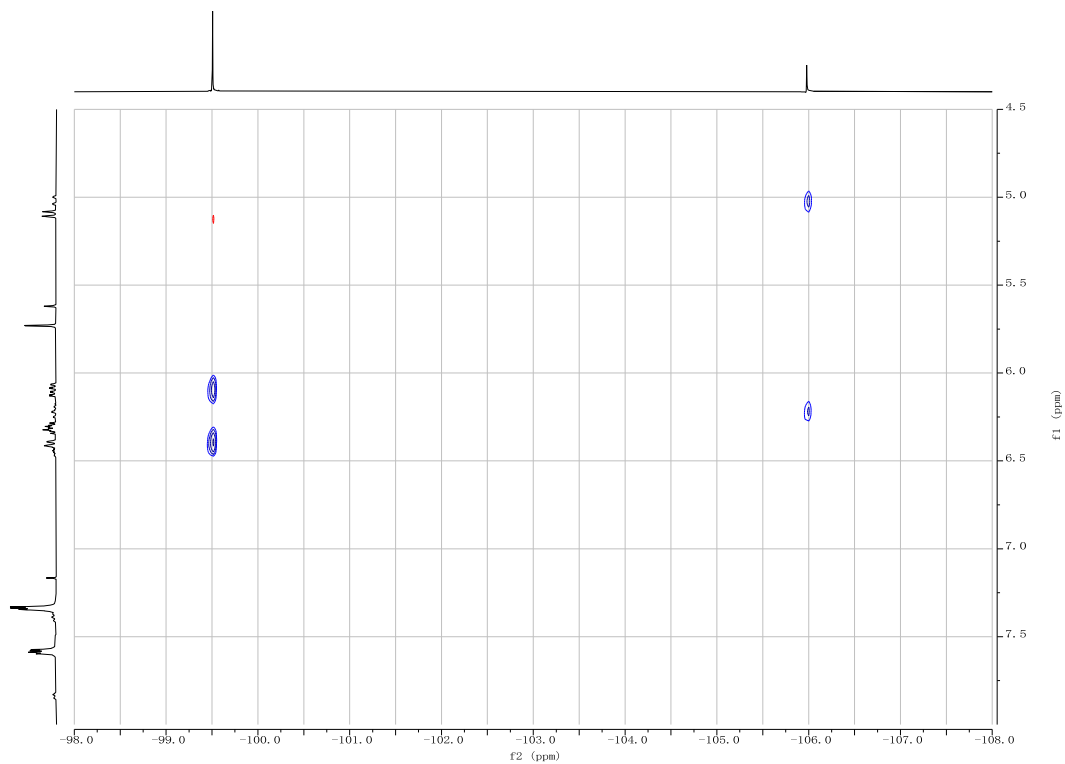

**Fig. S16.**  $^{19}\text{F}$ - $^1\text{H}$  HONESY of **2zd** (400 MHz,  $\text{CDCl}_3$ )

**Note:** According to the NMR data analysis, **2zd-1:2zd-2** = 1:3.

## 8. X-Ray crystallographic data of 2c, 2za and 6b

(1) X-ray crystallographic analysis of a single crystal of compound **2c** (CCDC2285183).

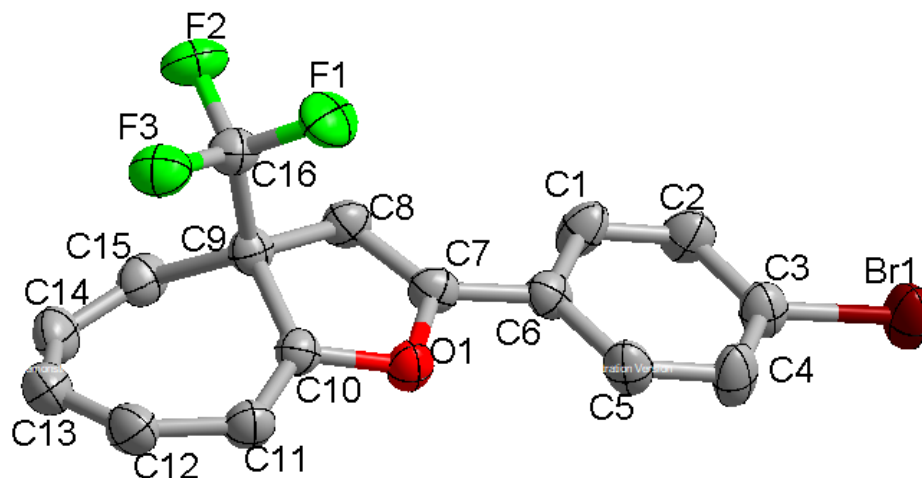

**Fig. S17.** Relative configuration of product **2c**

Displacement ellipsoids are drawn at the 30% probability level.

(Solvents: dichloromethane/petroleum ether = 1:10)

**Table S3** Crystal data and structure refinement for compound **2c** (CCDC2285183).

|                                    |                                                    |
|------------------------------------|----------------------------------------------------|
| identification code                |                                                    |
| Empirical formula                  | C <sub>16</sub> H <sub>10</sub> BrF <sub>3</sub> O |
| Formula weight                     | 355.15                                             |
| Temperature/K                      | 293(2)                                             |
| Crystal system                     | Monoclinic                                         |
| Space group                        | P2 <sub>1</sub> /c                                 |
| a/Å                                | 16.291(2)                                          |
| b/Å                                | 6.2878(6)                                          |
| c/Å                                | 15.4937(18)                                        |
| α/°                                | 90                                                 |
| β/°                                | 116.475(15)                                        |
| γ/°                                | 90                                                 |
| Volume/Å <sup>3</sup>              | 1420.7(3)                                          |
| Z                                  | 4                                                  |
| ρ <sub>calc</sub> /cm <sup>3</sup> | 1.660                                              |
| μ/mm <sup>-1</sup>                 | 4.235                                              |
| F(000)                             | 704.0                                              |
| Crystal size/mm <sup>3</sup>       | 0.339 × 0.137 × 0.078                              |
| Radiation                          | CuKα (λ = 1.54184)                                 |

|                                                  |                                                               |
|--------------------------------------------------|---------------------------------------------------------------|
| 2 $\theta$ range for data collection/ $^{\circ}$ | 11.428 to 134.124                                             |
| Index ranges                                     | $-15 \leq h \leq 19, -7 \leq k \leq 5, -17 \leq l \leq 18$    |
| Reflections collected                            | 5416                                                          |
| Independent reflections                          | 2534 [ $R_{\text{int}} = 0.0355, R_{\text{sigma}} = 0.0445$ ] |
| Data/restraints/parameters                       | 2534/1/200                                                    |
| Goodness-of-fit on F2                            | 1.021                                                         |
| Final R indexes [ $I \geq 2\sigma(I)$ ]          | $R_1 = 0.0561, wR_2 = 0.1482$                                 |
| Final R indexes [all data]                       | $R_1 = 0.0776, wR_2 = 0.1725$                                 |
| Largest diff. peak/hole / $e \text{ \AA}^{-3}$   | 1.10/-0.35                                                    |

Table S4 Fractional Atomic Coordinates ( $\times 10^4$ ) and Equivalent Isotropic Displacement Parameters ( $\text{\AA}^2 \times 10^3$ ) for **2c**.  $U_{\text{eq}}$  is defined as 1/3 of the trace of the orthogonalised UIJ tensor.

| Atom | x          | y         | Z         | U(eq)    |
|------|------------|-----------|-----------|----------|
| Br1  | 9673(3)    | 11366(6)  | 11719(3)  | 97.2(7)  |
| Br1A | 9772(8)    | 11230(20) | 11575(8)  | 97.2(7)  |
| F1   | 5949(2)    | 1950(6)   | 7937(2)   | 88.8(9)  |
| F2   | 4931.4(19) | 3334(5)   | 6639(2)   | 83.1(9)  |
| F3   | 5587(2)    | 454(5)    | 6583(2)   | 79.5(8)  |
| O1   | 7973(2)    | 3621(5)   | 8211(2)   | 63.6(7)  |
| C1   | 7690(6)    | 8720(20)  | 9247(11)  | 70(2)    |
| C2   | 8178(7)    | 10020(20) | 10016(11) | 71(2)    |
| C3   | 9031(7)    | 9418(15)  | 10689(6)  | 68(2)    |
| C3A  | 9000(19)   | 9700(50)  | 10510(20) | 68(2)    |
| C4A  | 9483(13)   | 8170(40)  | 10276(16) | 83(3)    |
| C5A  | 9018(16)   | 6770(30)  | 9520(16)  | 71(2)    |
| C6A  | 8070(16)   | 6890(50)  | 9000(20)  | 56.3(18) |
| C1A  | 7586(13)   | 8420(70)  | 9240(30)  | 70(2)    |
| C2A  | 8051(19)   | 9820(70)  | 9990(30)  | 71(2)    |
| C4   | 9393(5)    | 7501(15)  | 10609(6)  | 83(3)    |
| C5   | 8899(5)    | 6188(13)  | 9831(6)   | 71(2)    |
| C6   | 8036(6)    | 6779(17)  | 9129(7)   | 56.3(18) |
| C7   | 7519(3)    | 5442(7)   | 8274(3)   | 57.4(9)  |
| C8   | 6674(3)    | 5582(7)   | 7551(3)   | 60.2(10) |
| C9   | 6475(3)    | 3664(7)   | 6914(3)   | 55.0(9)  |
| C10  | 7405(3)    | 2575(7)   | 7363(3)   | 55.3(9)  |

|     |         |          |         |          |
|-----|---------|----------|---------|----------|
| C11 | 7722(3) | 941(8)   | 7057(3) | 67.3(11) |
| C12 | 7257(4) | -101(9)  | 6143(4) | 77.8(13) |
| C13 | 6585(4) | 726(10)  | 5332(4) | 80.4(14) |
| C14 | 6210(4) | 2832(10) | 5207(3) | 77.0(13) |
| C15 | 6185(3) | 4171(8)  | 5861(3) | 67.4(11) |
| C16 | 5740(3) | 2341(7)  | 7020(3) | 60.6(10) |

Table S5 Anisotropic Displacement Parameters ( $\text{\AA}^2 \times 10^3$ ) for **2c**. The Anisotropic displacement factor exponent takes the form:  $-2\pi^2[h^2a^2U_{11}+2hka*b*U_{12}+\dots]$ .

| Atom | $U_{11}$ | $U_{22}$ | $U_{33}$ | $U_{23}$ | $U_{13}$ | $U_{12}$ |
|------|----------|----------|----------|----------|----------|----------|
| Br1  | 95.5(10) | 92.3(7)  | 79.9(11) | -32.7(7) | 17.6(6)  | 22.1(6)  |
| Br1A | 95.5(10) | 92.3(7)  | 79.9(11) | -32.7(7) | 17.6(6)  | 22.1(6)  |
| F1   | 95(2)    | 108(2)   | 75.8(17) | 21.5(17) | 49.5(15) | -1.9(18) |
| F2   | 57.1(14) | 84(2)    | 110(2)   | 15.4(16) | 39.1(14) | 12.1(13) |
| F3   | 77.6(17) | 65.1(16) | 104(2)   | -3.3(15) | 47.8(15) | -8.2(14) |
| O1   | 57.9(15) | 64.1(18) | 58.6(15) | -2.7(13) | 16.8(12) | 12.8(13) |
| C1   | 55(3)    | 53(5)    | 81(3)    | -3(3)    | 11(3)    | 5(3)     |
| C2   | 68(4)    | 56(4)    | 81(3)    | -2(3)    | 27(3)    | 12(3)    |
| C3   | 74(3)    | 63(4)    | 58(4)    | 3(3)     | 21(3)    | 14(3)    |
| C3A  | 74(3)    | 63(4)    | 58(4)    | 3(3)     | 21(3)    | 14(3)    |
| C4A  | 77(4)    | 89(6)    | 55(4)    | -2(3)    | 3(3)     | 32(4)    |
| C5A  | 76(4)    | 69(4)    | 61(4)    | -3(3)    | 24(3)    | 27(3)    |
| C6A  | 62(2)    | 58(3)    | 51(3)    | 9(3)     | 27(2)    | 10(2)    |
| C1A  | 55(3)    | 53(5)    | 81(3)    | -3(3)    | 11(3)    | 5(3)     |
| C2A  | 68(4)    | 56(4)    | 81(3)    | -2(3)    | 27(3)    | 12(3)    |
| C4   | 77(4)    | 89(6)    | 55(4)    | -2(3)    | 3(3)     | 32(4)    |
| C5   | 76(4)    | 69(4)    | 61(4)    | -3(3)    | 24(3)    | 27(3)    |
| C6   | 62(2)    | 58(3)    | 51(3)    | 9(3)     | 27(2)    | 10(2)    |
| C7   | 59(2)    | 53(2)    | 61(2)    | 8.4(18)  | 27.0(18) | 11.6(18) |
| C8   | 57(2)    | 59(2)    | 62(2)    | 6.8(19)  | 23.8(17) | 12.1(19) |
| C9   | 57(2)    | 56(2)    | 49.0(19) | 7.2(16)  | 21.7(16) | 3.0(18)  |
| C10  | 55(2)    | 59(2)    | 52(2)    | 4.5(17)  | 24.0(16) | 4.3(18)  |
| C11  | 58(2)    | 70(3)    | 69(3)    | -1(2)    | 24.6(19) | 11(2)    |
| C12  | 75(3)    | 79(3)    | 83(3)    | -19(3)   | 39(2)    | 0(3)     |
| C13  | 75(3)    | 103(4)   | 67(3)    | -14(3)   | 35(2)    | -3(3)    |



|     |       |       |       |          |          |         |
|-----|-------|-------|-------|----------|----------|---------|
| C14 | 80(3) | 98(4) | 51(2) | 6(2)     | 28(2)    | -4(3)   |
| C15 | 63(2) | 74(3) | 61(2) | 18(2)    | 23.6(19) | 2(2)    |
| C16 | 59(2) | 61(2) | 65(2) | 10.4(19) | 30.6(19) | 6.3(19) |

Table S6 Bond Lengths for **2c**.

| Atom | Atom | Length/Å  |  | Atom | Atom | Length/Å  |
|------|------|-----------|--|------|------|-----------|
| Br1  | C3   | 1.911(8)  |  | C6A  | C7   | 1.416(17) |
| Br1A | C3A  | 1.838(18) |  | C1A  | C2A  | 1.3900    |
| F1   | C16  | 1.327(5)  |  | C4   | C5   | 1.385(10) |
| F2   | C16  | 1.335(5)  |  | C5   | C6   | 1.390(10) |
| F3   | C16  | 1.333(6)  |  | C6   | C7   | 1.475(9)  |
| O1   | C7   | 1.389(5)  |  | C7   | C8   | 1.336(6)  |
| O1   | C10  | 1.389(5)  |  | C8   | C9   | 1.499(6)  |
| C1   | C2   | 1.369(9)  |  | C9   | C10  | 1.519(6)  |
| C1   | C6   | 1.393(9)  |  | C9   | C15  | 1.517(6)  |
| C2   | C3   | 1.368(10) |  | C9   | C16  | 1.526(6)  |
| C3   | C4   | 1.372(10) |  | C10  | C11  | 1.330(6)  |
| C3A  | C4A  | 1.3900    |  | C11  | C12  | 1.432(7)  |
| C3A  | C2A  | 1.3900    |  | C12  | C13  | 1.350(8)  |
| C4A  | C5A  | 1.3900    |  | C13  | C14  | 1.435(8)  |
| C5A  | C6A  | 1.3900    |  | C14  | C15  | 1.331(7)  |
| C6A  | C1A  | 1.3900    |  |      |      |           |

Table S7 Bond Angles for **2c**.

| Atom | Atom | Atom | Angle/°   |  | Atom | Atom | Atom | Angle/°   |
|------|------|------|-----------|--|------|------|------|-----------|
| C10  | O1   | C7   | 107.8(3)  |  | C8   | C7   | C6A  | 132.5(13) |
| C2   | C1   | C6   | 121.7(6)  |  | C8   | C7   | C6   | 132.7(5)  |
| C3   | C2   | C1   | 119.7(6)  |  | C7   | C8   | C9   | 109.8(4)  |
| C2   | C3   | Br1  | 116.7(7)  |  | C8   | C9   | C10  | 100.5(3)  |
| C2   | C3   | C4   | 120.5(6)  |  | C8   | C9   | C15  | 114.3(4)  |
| C4   | C3   | Br1  | 122.8(6)  |  | C8   | C9   | C16  | 108.5(4)  |
| C4A  | C3A  | Br1A | 110.9(16) |  | C10  | C9   | C16  | 112.0(3)  |
| C4A  | C3A  | C2A  | 120.0     |  | C15  | C9   | C10  | 110.9(4)  |
| C2A  | C3A  | Br1A | 129.0(16) |  | C15  | C9   | C16  | 110.3(4)  |

|     |     |     |           |  |     |     |     |          |
|-----|-----|-----|-----------|--|-----|-----|-----|----------|
| C3A | C4A | C5A | 120.0     |  | O1  | C10 | C9  | 109.1(3) |
| C4A | C5A | C6A | 120.0     |  | C11 | C10 | O1  | 120.2(4) |
| C5A | C6A | C7  | 125(2)    |  | C11 | C10 | C9  | 130.7(4) |
| C1A | C6A | C5A | 120.0     |  | C10 | C11 | C12 | 126.0(4) |
| C1A | C6A | C7  | 115(2)    |  | C13 | C12 | C11 | 126.6(5) |
| C6A | C1A | C2A | 120.0     |  | C12 | C13 | C14 | 126.9(5) |
| C1A | C2A | C3A | 120.0     |  | C15 | C14 | C13 | 129.5(5) |
| C3  | C4  | C5  | 119.8(6)  |  | C14 | C15 | C9  | 125.8(5) |
| C4  | C5  | C6  | 120.9(6)  |  | F1  | C16 | F2  | 107.0(4) |
| C1  | C6  | C7  | 121.0(7)  |  | F1  | C16 | F3  | 106.2(4) |
| C5  | C6  | C1  | 117.4(6)  |  | F1  | C16 | C9  | 112.2(4) |
| C5  | C6  | C7  | 121.6(8)  |  | F2  | C16 | C9  | 111.4(4) |
| O1  | C7  | C6A | 114.8(13) |  | F3  | C16 | F2  | 105.5(4) |
| O1  | C7  | C6  | 115.1(5)  |  | F3  | C16 | C9  | 114.1(4) |
| C8  | C7  | O1  | 112.2(4)  |  |     |     |     |          |

Table S8 Torsion Angles for 2c.

| A    | B   | C   | D   | Angle/°    |  | A   | B   | C   | D   | Angle/°    |
|------|-----|-----|-----|------------|--|-----|-----|-----|-----|------------|
| Br1  | C3  | C4  | C5  | -178.3(7)  |  | C7  | O1  | C10 | C11 | 170.5(4)   |
| Br1A | C3A | C4A | C5A | 177(2)     |  | C7  | C6A | C1A | C2A | 175(3)     |
| Br1A | C3A | C2A | C1A | -176(3)    |  | C7  | C8  | C9  | C10 | -5.8(5)    |
| O1   | C7  | C8  | C9  | 1.8(5)     |  | C7  | C8  | C9  | C15 | -124.6(4)  |
| O1   | C10 | C11 | C12 | -171.5(5)  |  | C7  | C8  | C9  | C16 | 111.8(4)   |
| C1   | C2  | C3  | Br1 | 178.5(9)   |  | C8  | C9  | C10 | O1  | 7.9(4)     |
| C1   | C2  | C3  | C4  | -1.2(13)   |  | C8  | C9  | C10 | C11 | -169.6(5)  |
| C1   | C6  | C7  | O1  | 175.4(7)   |  | C8  | C9  | C15 | C14 | 160.7(5)   |
| C1   | C6  | C7  | C8  | -7.6(12)   |  | C8  | C9  | C16 | F1  | -51.1(5)   |
| C2   | C1  | C6  | C5  | 0.6(11)    |  | C8  | C9  | C16 | F2  | 68.8(4)    |
| C2   | C1  | C6  | C7  | -177.2(10) |  | C8  | C9  | C16 | F3  | -171.9(3)  |
| C2   | C3  | C4  | C5  | 1.3(15)    |  | C9  | C10 | C11 | C12 | 5.9(9)     |
| C3   | C4  | C5  | C6  | -0.4(15)   |  | C10 | O1  | C7  | C6A | -168.6(19) |
| C3A  | C4A | C5A | C6A | 0.0        |  | C10 | O1  | C7  | C6  | -178.8(6)  |
| C4A  | C3A | C2A | C1A | 0.0        |  | C10 | O1  | C7  | C8  | 3.6(5)     |
| C4A  | C5A | C6A | C1A | 0.0        |  | C10 | C9  | C15 | C14 | 47.9(6)    |
| C4A  | C5A | C6A | C7  | -174(3)    |  | C10 | C9  | C16 | F1  | 59.0(5)    |

|     |     |     |     |            |  |     |     |     |     |           |
|-----|-----|-----|-----|------------|--|-----|-----|-----|-----|-----------|
| C5A | C6A | C1A | C2A | 0.0        |  | C10 | C9  | C16 | F2  | 178.8(4)  |
| C5A | C6A | C7  | O1  | 10(4)      |  | C10 | C9  | C16 | F3  | -61.9(5)  |
| C5A | C6A | C7  | C8  | -159.8(19) |  | C10 | C11 | C12 | C13 | 22.8(9)   |
| C6A | C1A | C2A | C3A | 0.0        |  | C11 | C12 | C13 | C14 | 1.5(10)   |
| C6A | C7  | C8  | C9  | 172(2)     |  | C12 | C13 | C14 | C15 | -24.7(10) |
| C1A | C6A | C7  | O1  | -164.2(16) |  | C13 | C14 | C15 | C9  | -6.8(9)   |
| C1A | C6A | C7  | C8  | 26(3)      |  | C15 | C9  | C10 | O1  | 129.2(4)  |
| C2A | C3A | C4A | C5A | 0.0        |  | C15 | C9  | C10 | C11 | -48.4(7)  |
| C4  | C5  | C6  | C1  | -0.5(12)   |  | C15 | C9  | C16 | F1  | -177.0(4) |
| C4  | C5  | C6  | C7  | 177.3(7)   |  | C15 | C9  | C16 | F2  | -57.1(5)  |
| C5  | C6  | C7  | O1  | -2.3(12)   |  | C15 | C9  | C16 | F3  | 62.2(5)   |
| C5  | C6  | C7  | C8  | 174.7(8)   |  | C16 | C9  | C10 | O1  | -107.1(4) |
| C6  | C1  | C2  | C3  | 0.2(12)    |  | C16 | C9  | C10 | C11 | 75.3(6)   |
| C6  | C7  | C8  | C9  | -175.2(7)  |  | C16 | C9  | C15 | C14 | -76.8(6)  |
| C7  | O1  | C10 | C9  | -7.4(5)    |  |     |     |     |     |           |

Table S9 Hydrogen Atom Coordinates ( $\text{\AA} \times 10^4$ ) and Isotropic Displacement Parameters ( $\text{\AA}^2 \times 10^3$ ) for **2c**.

| Atom | x     | y     | z     | U(eq) |
|------|-------|-------|-------|-------|
| H1   | 7112  | 9153  | 8791  | 84    |
| H2   | 7931  | 11315 | 10080 | 85    |
| H4A  | 10118 | 8090  | 10624 | 100   |
| H5A  | 9342  | 5748  | 9362  | 85    |
| H1A  | 6952  | 8503  | 8889  | 84    |
| H2A  | 7728  | 10845 | 10150 | 85    |
| H4   | 9968  | 7084  | 11076 | 100   |
| H5   | 9149  | 4894  | 9776  | 85    |
| H8   | 6269  | 6701  | 7456  | 72    |
| H11  | 8300  | 428   | 7474  | 81    |
| H12  | 7435  | -1488 | 6105  | 93    |
| H13  | 6338  | -164  | 4797  | 97    |
| H14  | 5946  | 3337  | 4577  | 92    |
| H15  | 5970  | 5538  | 5653  | 81    |

Table S10 Atomic Occupancy for **2c**.

| Atom | Occupancy |  | Atom | Occupancy |  | Atom | Occupancy |
|------|-----------|--|------|-----------|--|------|-----------|
| Br1  | 0.752(15) |  | Br1A | 0.248(15) |  | C1   | 0.752(15) |
| H1   | 0.752(15) |  | C2   | 0.752(15) |  | H2   | 0.752(15) |
| C3   | 0.752(15) |  | C3A  | 0.248(15) |  | C4A  | 0.248(15) |
| H4A  | 0.248(15) |  | C5A  | 0.248(15) |  | H5A  | 0.248(15) |
| C6A  | 0.248(15) |  | C1A  | 0.248(15) |  | H1A  | 0.248(15) |
| C2A  | 0.248(15) |  | H2A  | 0.248(15) |  | C4   | 0.752(15) |
| H4   | 0.752(15) |  | C5   | 0.752(15) |  | H5   | 0.752(15) |
| C6   | 0.752(15) |  |      |           |  |      |           |

(2) X-ray crystallographic analysis of a single crystal of compound **2za** (CCDC 2348513).

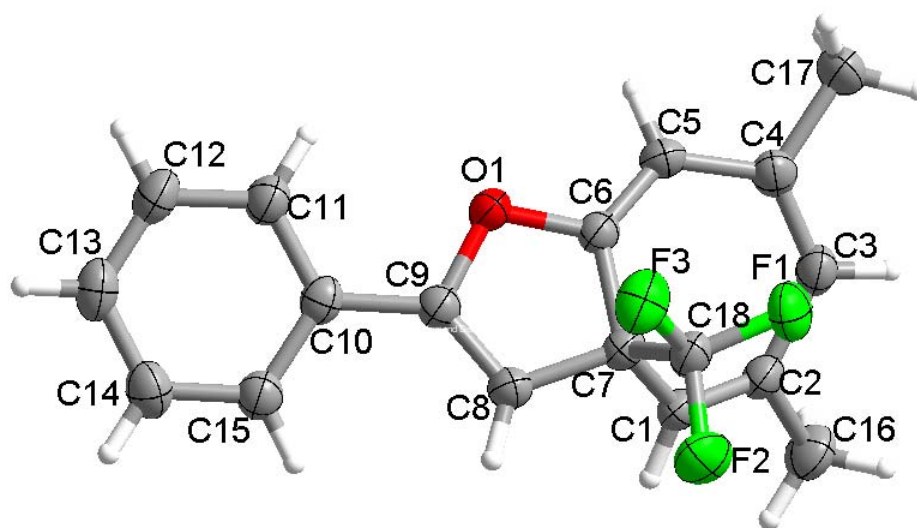

**Fig. S18.** Relative configuration of product **2za**

Displacement ellipsoids are drawn at the 30% probability level.

(Solvents: diethyl ether/petroleum ether = 1:10)

**Table S11** Crystal data and structure refinement for **2za** (CCDC 2348513).

|                     |                                                  |
|---------------------|--------------------------------------------------|
| Identification code |                                                  |
| Empirical formula   | C <sub>18</sub> H <sub>15</sub> F <sub>3</sub> O |
| Formula weight      | 304.30                                           |
| Temperature/K       | 293(2)                                           |
| Crystal system      | triclinic                                        |
| Space group         | P-1                                              |
| a/Å                 | 6.9554(4)                                        |

|                                                |                                                   |
|------------------------------------------------|---------------------------------------------------|
| b/Å                                            | 13.0085(7)                                        |
| c/Å                                            | 17.4007(13)                                       |
| $\alpha/^\circ$                                | 75.775(6)                                         |
| $\beta/^\circ$                                 | 80.036(6)                                         |
| $\gamma/^\circ$                                | 89.708(5)                                         |
| Volume/Å <sup>3</sup>                          | 1501.95(17)                                       |
| Z                                              | 4                                                 |
| $\rho_{\text{calc}}/\text{cm}^3$               | 1.346                                             |
| $\mu/\text{mm}^{-1}$                           | 0.912                                             |
| F(000)                                         | 632.0                                             |
| Crystal size/mm <sup>3</sup>                   | 0.19 × 0.11 × 0.08                                |
| Radiation                                      | CuK $\alpha$ ( $\lambda = 1.54184$ )              |
| 2 $\Theta$ range for data collection/ $^\circ$ | 7.016 to 134.16                                   |
| Index ranges                                   | -8 ≤ h ≤ 7, -15 ≤ k ≤ 15, -20 ≤ l ≤ 20            |
| Reflections collected                          | 8516                                              |
| Independent reflections                        | 8516 [Rint = ?, Rsigma = 0.0416]                  |
| Data/restraints/parameters                     | 8516/0/402                                        |
| Goodness-of-fit on F <sup>2</sup>              | 1.003                                             |
| Final R indexes [ $I \geq 2\sigma(I)$ ]        | R <sub>1</sub> = 0.0513, wR <sub>2</sub> = 0.1190 |
| Final R indexes [all data]                     | R <sub>1</sub> = 0.0797, wR <sub>2</sub> = 0.1277 |
| Largest diff. peak/hole / e Å <sup>-3</sup>    | 0.24/-0.28                                        |

Table S12 Fractional Atomic Coordinates ( $\times 10^4$ ) and Equivalent Isotropic Displacement Parameters ( $\text{\AA}^2 \times 10^3$ ) for **2za**. U<sub>eq</sub> is defined as 1/3 of of the trace of the orthogonalised UIJ tensor.

| Atom | x        | y       | z          | U(eq)   |
|------|----------|---------|------------|---------|
| C1   | 806(5)   | 2112(3) | 7811.9(19) | 56.6(7) |
| C2   | -547(5)  | 1872(3) | 8477.7(19) | 59.6(7) |
| C3   | -1146(5) | 811(3)  | 8978.3(19) | 63.7(8) |
| C4   | -1131(5) | -113(3) | 8765(2)    | 61.2(8) |
| C5   | -412(4)  | -216(3) | 7959.3(19) | 56.1(7) |
| C6   | 922(4)   | 411(2)  | 7403.3(18) | 50.9(7) |
| C7   | 2108(4)  | 1359(3) | 7457.8(18) | 52.8(7) |
| C8   | 2967(4)  | 1793(3) | 6579.5(19) | 55.9(7) |

|      |          |            |            |          |
|------|----------|------------|------------|----------|
| C9   | 2490(4)  | 1150(2)    | 6148.4(18) | 52.8(7)  |
| C10  | 2927(4)  | 1193(3)    | 5291.6(18) | 54.5(7)  |
| C11  | 2512(5)  | 326(3)     | 5003(2)    | 66.2(8)  |
| C12  | 2951(5)  | 387(3)     | 4188(2)    | 75.3(10) |
| C13  | 3798(5)  | 1282(3)    | 3656(2)    | 73.0(10) |
| C14  | 4217(5)  | 2150(3)    | 3932(2)    | 73.5(10) |
| C15  | 3790(5)  | 2108(3)    | 4741(2)    | 64.5(8)  |
| C16  | -1666(6) | 2756(4)    | 8762(3)    | 81.6(11) |
| C17  | -2016(6) | -1111(4)   | 9365(2)    | 83.1(11) |
| C18  | 3772(5)  | 1037(3)    | 7922(2)    | 60.4(8)  |
| F1   | 3210(3)  | 542.9(18)  | 8694.3(12) | 76.0(6)  |
| F2   | 4884(3)  | 1886(2)    | 7897.8(15) | 88.6(7)  |
| F3   | 4982(3)  | 377(2)     | 7606.0(14) | 84.3(6)  |
| O1   | 1313(3)  | 285.9(17)  | 6626.4(12) | 58.6(5)  |
| C1'  | 8343(4)  | 2887(3)    | 2178.7(18) | 55.5(7)  |
| C2'  | 7581(5)  | 3142(3)    | 1503.2(19) | 60.4(8)  |
| C3'  | 7448(5)  | 4195(3)    | 999.5(19)  | 61.7(8)  |
| C4'  | 7281(5)  | 5125(3)    | 1207.0(18) | 59.0(8)  |
| C5'  | 7269(4)  | 5235(3)    | 2014.8(19) | 56.8(7)  |
| C6'  | 8088(4)  | 4596(2)    | 2581.5(17) | 50.2(7)  |
| C7'  | 9329(4)  | 3646(2)    | 2535.4(17) | 50.3(7)  |
| C8'  | 9402(4)  | 3210(3)    | 3418.7(18) | 54.5(7)  |
| C9'  | 8534(4)  | 3860(3)    | 3840.6(18) | 53.2(7)  |
| C10' | 8185(4)  | 3816(3)    | 4701.7(18) | 53.8(7)  |
| C11' | 7520(5)  | 4689(3)    | 4985(2)    | 66.0(8)  |
| C12' | 7218(5)  | 4635(3)    | 5801(2)    | 75.8(10) |
| C13' | 7567(5)  | 3723(3)    | 6337(2)    | 73.5(10) |
| C14' | 8215(5)  | 2847(3)    | 6066(2)    | 73.7(10) |
| C15' | 8532(5)  | 2896(3)    | 5254(2)    | 67.2(9)  |
| C16' | 6726(6)  | 2259(3)    | 1225(3)    | 77.5(10) |
| C17' | 7001(7)  | 6137(4)    | 592(2)     | 89.0(12) |
| C18' | 11412(4) | 3957(3)    | 2081(2)    | 59.1(8)  |
| F1'  | 12327(3) | 4599(2)    | 2405.4(14) | 85.3(7)  |
| F2'  | 12482(3) | 3092(2)    | 2106.9(16) | 91.0(7)  |
| F3'  | 11545(3) | 4448.9(19) | 1308.9(12) | 78.1(6)  |

|     |         |            |            |         |
|-----|---------|------------|------------|---------|
| O1' | 7776(3) | 4726.0(17) | 3357.0(12) | 57.7(5) |
|-----|---------|------------|------------|---------|

Table S13 Anisotropic Displacement Parameters ( $\text{\AA}^2 \times 10^3$ ) for **2za**. The Anisotropic displacement factor exponent takes the form:  $-2\pi^2[h^2a^2U_{11}+2hka^*b^*U_{12}+\dots]$ .

| Atom | U11      | U22       | U33      | U23       | U13       | U12       |
|------|----------|-----------|----------|-----------|-----------|-----------|
| C1   | 74(2)    | 49.1(19)  | 51.5(17) | -18.1(13) | -16.3(13) | -2.5(13)  |
| C2   | 73(2)    | 59(2)     | 53.4(18) | -24.9(15) | -14.4(13) | 3.1(14)   |
| C3   | 67(2)    | 77(3)     | 48.3(17) | -22.1(16) | -5.6(13)  | -5.5(15)  |
| C4   | 58.4(19) | 69(2)     | 55.7(18) | -13.4(16) | -10.3(13) | -11.4(14) |
| C5   | 62(2)    | 49.9(19)  | 58.7(18) | -17.4(14) | -11.1(13) | -7.4(12)  |
| C6   | 55.0(18) | 51.0(19)  | 49.5(16) | -15.9(13) | -11.7(12) | 2.1(12)   |
| C7   | 58.8(19) | 52(2)     | 52.4(18) | -19.9(14) | -13.1(12) | -0.6(12)  |
| C8   | 60.4(19) | 53.6(19)  | 54.3(17) | -15.8(14) | -8.7(12)  | -6.4(13)  |
| C9   | 51.6(18) | 55.3(19)  | 52.5(17) | -15.8(14) | -8.3(12)  | 0.7(12)   |
| C10  | 48.4(17) | 66(2)     | 53.5(17) | -21.0(14) | -11.0(11) | 5.0(12)   |
| C11  | 72(2)    | 72(2)     | 58.0(19) | -24.0(16) | -9.2(14)  | -0.8(15)  |
| C12  | 82(3)    | 90(3)     | 65(2)    | -40(2)    | -14.0(17) | 4.6(19)   |
| C13  | 68(2)    | 102(3)    | 52.8(19) | -26.9(19) | -9.8(14)  | 12.6(18)  |
| C14  | 68(2)    | 89(3)     | 57(2)    | -11.8(19) | -2.9(14)  | -1.5(17)  |
| C15  | 66(2)    | 70(2)     | 58.1(19) | -19.0(16) | -10.1(14) | -1.8(15)  |
| C16  | 91(3)    | 84(3)     | 76(3)    | -39(2)    | -5.8(17)  | 9.5(18)   |
| C17  | 100(3)   | 79(3)     | 63(2)    | -12.6(19) | -0.3(17)  | -27.3(19) |
| C18  | 68(2)    | 66(2)     | 50.5(19) | -20.8(16) | -11.6(13) | -5.3(15)  |
| F1   | 76.9(13) | 95.9(16)  | 54.6(12) | -12.1(10) | -19.6(8)  | 3.0(9)    |
| F2   | 86.1(15) | 93.0(18)  | 95.8(16) | -26.4(13) | -36.2(12) | -21.7(11) |
| F3   | 75.1(14) | 105.7(19) | 83.1(15) | -37.6(13) | -24.1(10) | 24.8(11)  |
| O1   | 67.6(14) | 59.5(14)  | 51.9(12) | -22.7(10) | -6.4(9)   | -8.7(9)   |
| C1'  | 66(2)    | 47.6(19)  | 53.1(18) | -19.4(13) | -2.5(12)  | 6.7(12)   |
| C2'  | 67(2)    | 63(2)     | 54.0(18) | -24.2(15) | -3.5(13)  | 4.0(13)   |
| C3'  | 73(2)    | 72(2)     | 45.2(16) | -21.2(15) | -13.4(13) | 8.2(14)   |
| C4'  | 67(2)    | 61(2)     | 49.2(17) | -13.3(14) | -10.7(12) | 11.3(13)  |
| C5'  | 65(2)    | 50.6(19)  | 55.9(18) | -15.0(14) | -10.4(12) | 10.4(12)  |
| C6'  | 50.8(17) | 52.8(19)  | 48.2(16) | -17.9(13) | -4.5(11)  | 3.3(11)   |
| C7'  | 52.4(18) | 51.0(19)  | 47.7(17) | -15.9(13) | -4.5(11)  | 7.9(11)   |
| C8'  | 60.4(19) | 53.7(19)  | 51.9(17) | -18.0(14) | -10.2(12) | 12.9(13)  |

|      |          |          |          |           |           |           |
|------|----------|----------|----------|-----------|-----------|-----------|
| C9'  | 50.5(18) | 59(2)    | 52.0(17) | -17.1(14) | -10.3(12) | 5.0(12)   |
| C10' | 45.8(17) | 71(2)    | 48.5(16) | -21.7(14) | -8.7(11)  | 2.0(12)   |
| C11' | 72(2)    | 75(2)    | 55.9(19) | -23.9(16) | -12.3(14) | 9.5(15)   |
| C12' | 81(3)    | 91(3)    | 62(2)    | -36(2)    | -5.9(16)  | 7.0(18)   |
| C13' | 72(2)    | 103(3)   | 48.1(18) | -27.1(19) | -5.9(14)  | -5.1(18)  |
| C14' | 77(2)    | 87(3)    | 57(2)    | -15.0(19) | -15.4(15) | 4.9(17)   |
| C15' | 70(2)    | 77(3)    | 58(2)    | -21.8(17) | -13.6(14) | 8.6(16)   |
| C16' | 102(3)   | 73(3)    | 69(2)    | -38.5(19) | -14.2(17) | 0.4(18)   |
| C17' | 127(4)   | 75(3)    | 64(2)    | -11(2)    | -25(2)    | 32(2)     |
| C18' | 55.0(19) | 67(2)    | 56.1(19) | -19.5(16) | -6.4(12)  | 11.3(14)  |
| F1'  | 66.0(13) | 110(2)   | 85.8(15) | -39.6(13) | -5.6(10)  | -12.9(11) |
| F2'  | 69.8(14) | 98.7(19) | 99.4(17) | -26.8(14) | 1.5(10)   | 31.1(11)  |
| F3'  | 75.0(13) | 99.2(17) | 51.5(11) | -11.8(10) | 2.3(8)    | 3.1(9)    |
| O1'  | 67.6(13) | 58.9(14) | 52.3(12) | -23.7(10) | -12.1(9)  | 15.7(9)   |

Table S14 Bond Lengths for **2za**.

| Atom | Atom | Length/Å |  | Atom | Atom | Length/Å |
|------|------|----------|--|------|------|----------|
| C1   | C2   | 1.332(5) |  | C1'  | C2'  | 1.340(5) |
| C1   | C7   | 1.501(5) |  | C1'  | C7'  | 1.513(4) |
| C2   | C3   | 1.458(5) |  | C2'  | C3'  | 1.446(5) |
| C2   | C16  | 1.520(5) |  | C2'  | C16' | 1.512(5) |
| C3   | C4   | 1.342(5) |  | C3'  | C4'  | 1.344(5) |
| C4   | C5   | 1.443(5) |  | C4'  | C5'  | 1.446(5) |
| C4   | C17  | 1.509(5) |  | C4'  | C17' | 1.515(5) |
| C5   | C6   | 1.331(4) |  | C5'  | C6'  | 1.332(4) |
| C6   | C7   | 1.518(4) |  | C6'  | C7'  | 1.515(4) |
| C6   | O1   | 1.382(4) |  | C6'  | O1'  | 1.381(4) |
| C7   | C8   | 1.508(4) |  | C7'  | C8'  | 1.512(4) |
| C7   | C18  | 1.523(4) |  | C7'  | C18' | 1.529(4) |
| C8   | C9   | 1.330(4) |  | C8'  | C9'  | 1.328(4) |
| C9   | C10  | 1.456(4) |  | C9'  | C10' | 1.463(4) |
| C9   | O1   | 1.393(4) |  | C9'  | O1'  | 1.392(4) |
| C10  | C11  | 1.392(5) |  | C10' | C11' | 1.392(5) |
| C10  | C15  | 1.394(5) |  | C10' | C15' | 1.388(5) |
| C11  | C12  | 1.381(5) |  | C11' | C12' | 1.383(5) |



|     |     |          |  |      |      |          |
|-----|-----|----------|--|------|------|----------|
| C12 | C13 | 1.360(6) |  | C12' | C13' | 1.367(6) |
| C13 | C14 | 1.381(6) |  | C13' | C14' | 1.381(6) |
| C14 | C15 | 1.376(5) |  | C14' | C15' | 1.378(5) |
| C18 | F1  | 1.330(4) |  | C18' | F1'  | 1.334(4) |
| C18 | F2  | 1.340(4) |  | C18' | F2'  | 1.342(4) |
| C18 | F3  | 1.346(4) |  | C18' | F3'  | 1.326(4) |

Table S15 Bond Angles for **2za**.

| Atom | Atom | Atom | Angle/°  |  | Atom | Atom | Atom | Angle/°  |
|------|------|------|----------|--|------|------|------|----------|
| C2   | C1   | C7   | 127.1(3) |  | C2'  | C1'  | C7'  | 126.2(3) |
| C1   | C2   | C3   | 126.4(3) |  | C1'  | C2'  | C3'  | 126.9(3) |
| C1   | C2   | C16  | 119.5(3) |  | C1'  | C2'  | C16' | 118.4(3) |
| C3   | C2   | C16  | 114.1(3) |  | C3'  | C2'  | C16' | 114.8(3) |
| C4   | C3   | C2   | 128.9(3) |  | C4'  | C3'  | C2'  | 129.0(3) |
| C3   | C4   | C5   | 123.8(3) |  | C3'  | C4'  | C5'  | 123.9(3) |
| C3   | C4   | C17  | 120.3(3) |  | C3'  | C4'  | C17' | 120.6(3) |
| C5   | C4   | C17  | 115.8(3) |  | C5'  | C4'  | C17' | 115.5(3) |
| C6   | C5   | C4   | 126.9(3) |  | C6'  | C5'  | C4'  | 126.5(3) |
| C5   | C6   | C7   | 129.8(3) |  | C5'  | C6'  | C7'  | 129.7(3) |
| C5   | C6   | O1   | 120.5(3) |  | C5'  | C6'  | O1'  | 120.3(3) |
| O1   | C6   | C7   | 109.6(2) |  | O1'  | C6'  | C7'  | 109.9(2) |
| C1   | C7   | C6   | 110.6(2) |  | C1'  | C7'  | C6'  | 110.5(2) |
| C1   | C7   | C8   | 113.7(3) |  | C1'  | C7'  | C18' | 111.4(3) |
| C1   | C7   | C18  | 111.2(3) |  | C6'  | C7'  | C18' | 112.9(3) |
| C6   | C7   | C18  | 112.6(3) |  | C8'  | C7'  | C1'  | 113.2(3) |
| C8   | C7   | C6   | 99.9(2)  |  | C8'  | C7'  | C6'  | 99.9(2)  |
| C8   | C7   | C18  | 108.5(2) |  | C8'  | C7'  | C18' | 108.5(2) |
| C9   | C8   | C7   | 110.2(3) |  | C9'  | C8'  | C7'  | 109.9(3) |
| C8   | C9   | C10  | 132.7(3) |  | C8'  | C9'  | C10' | 132.5(3) |
| C8   | C9   | O1   | 111.8(3) |  | C8'  | C9'  | O1'  | 112.1(3) |
| O1   | C9   | C10  | 115.5(3) |  | O1'  | C9'  | C10' | 115.4(3) |
| C11  | C10  | C9   | 121.2(3) |  | C11' | C10' | C9'  | 121.2(3) |
| C11  | C10  | C15  | 118.5(3) |  | C15' | C10' | C9'  | 120.1(3) |
| C15  | C10  | C9   | 120.3(3) |  | C15' | C10' | C11' | 118.7(3) |
| C12  | C11  | C10  | 119.9(4) |  | C12' | C11' | C10' | 120.3(4) |

|     |     |     |          |  |      |      |      |          |
|-----|-----|-----|----------|--|------|------|------|----------|
| C13 | C12 | C11 | 121.1(4) |  | C13' | C12' | C11' | 120.3(4) |
| C12 | C13 | C14 | 119.7(3) |  | C12' | C13' | C14' | 120.1(3) |
| C15 | C14 | C13 | 120.3(4) |  | C15' | C14' | C13' | 120.0(4) |
| C14 | C15 | C10 | 120.5(3) |  | C14' | C15' | C10' | 120.6(4) |
| F1  | C18 | C7  | 114.7(3) |  | F1'  | C18' | C7'  | 112.2(3) |
| F1  | C18 | F2  | 106.9(3) |  | F1'  | C18' | F2'  | 106.6(3) |
| F1  | C18 | F3  | 105.6(3) |  | F2'  | C18' | C7'  | 110.3(3) |
| F2  | C18 | C7  | 110.9(3) |  | F3'  | C18' | C7'  | 114.8(3) |
| F2  | C18 | F3  | 105.9(3) |  | F3'  | C18' | F1'  | 106.0(3) |
| F3  | C18 | C7  | 112.3(3) |  | F3'  | C18' | F2'  | 106.4(3) |
| C6  | O1  | C9  | 108.0(2) |  | C6'  | O1'  | C9'  | 107.7(2) |

Table S16 Torsion Angles for **2za**.

| A  | B  | C   | D   | Angle/°   |  | A   | B   | C    | D    | Angle/°   |
|----|----|-----|-----|-----------|--|-----|-----|------|------|-----------|
| C1 | C2 | C3  | C4  | -28.9(5)  |  | C1' | C2' | C3'  | C4'  | -29.5(5)  |
| C1 | C7 | C8  | C9  | -122.7(3) |  | C1' | C7' | C8'  | C9'  | -122.6(3) |
| C1 | C7 | C18 | F1  | 60.6(4)   |  | C1' | C7' | C18' | F1'  | -177.9(3) |
| C1 | C7 | C18 | F2  | -60.6(4)  |  | C1' | C7' | C18' | F2'  | -59.2(4)  |
| C1 | C7 | C18 | F3  | -178.8(3) |  | C1' | C7' | C18' | F3'  | 61.0(4)   |
| C2 | C1 | C7  | C6  | 48.8(4)   |  | C2' | C1' | C7'  | C6'  | 48.9(4)   |
| C2 | C1 | C7  | C8  | 160.2(3)  |  | C2' | C1' | C7'  | C8'  | 160.0(3)  |
| C2 | C1 | C7  | C18 | -77.1(4)  |  | C2' | C1' | C7'  | C18' | -77.4(4)  |
| C2 | C3 | C4  | C5  | 2.4(6)    |  | C2' | C3' | C4'  | C5'  | 2.2(5)    |
| C2 | C3 | C4  | C17 | -173.6(3) |  | C2' | C3' | C4'  | C17' | -175.1(3) |
| C3 | C4 | C5  | C6  | 26.3(5)   |  | C3' | C4' | C5'  | C6'  | 26.2(5)   |
| C4 | C5 | C6  | C7  | 2.9(6)    |  | C4' | C5' | C6'  | C7'  | 4.2(5)    |
| C4 | C5 | C6  | O1  | -172.8(3) |  | C4' | C5' | C6'  | O1'  | -172.6(3) |
| C5 | C6 | C7  | C1  | -49.0(4)  |  | C5' | C6' | C7'  | C1'  | -50.5(4)  |
| C5 | C6 | C7  | C8  | -169.0(3) |  | C5' | C6' | C7'  | C8'  | -169.9(3) |
| C5 | C6 | C7  | C18 | 76.0(4)   |  | C5' | C6' | C7'  | C18' | 75.1(4)   |
| C5 | C6 | O1  | C9  | 169.7(3)  |  | C5' | C6' | O1'  | C9'  | 170.7(3)  |
| C6 | C7 | C8  | C9  | -4.9(3)   |  | C6' | C7' | C8'  | C9'  | -5.1(3)   |
| C6 | C7 | C18 | F1  | -64.1(4)  |  | C6' | C7' | C18' | F1'  | 57.1(4)   |
| C6 | C7 | C18 | F2  | 174.7(3)  |  | C6' | C7' | C18' | F2'  | 175.7(3)  |
| C6 | C7 | C18 | F3  | 56.5(4)   |  | C6' | C7' | C18' | F3'  | -64.1(4)  |

|     |     |     |     |           |  |      |      |      |      |           |
|-----|-----|-----|-----|-----------|--|------|------|------|------|-----------|
| C7  | C1  | C2  | C3  | -4.4(5)   |  | C7'  | C1'  | C2'  | C3'  | -3.6(5)   |
| C7  | C1  | C2  | C16 | 177.4(3)  |  | C7'  | C1'  | C2'  | C16' | 177.5(3)  |
| C7  | C6  | O1  | C9  | -6.8(3)   |  | C7'  | C6'  | O1'  | C9'  | -6.7(3)   |
| C7  | C8  | C9  | C10 | 180.0(3)  |  | C7'  | C8'  | C9'  | C10' | 179.4(3)  |
| C7  | C8  | C9  | O1  | 1.3(4)    |  | C7'  | C8'  | C9'  | O1'  | 1.6(4)    |
| C8  | C7  | C18 | F1  | -173.7(3) |  | C8'  | C7'  | C18' | F1'  | -52.6(4)  |
| C8  | C7  | C18 | F2  | 65.1(4)   |  | C8'  | C7'  | C18' | F2'  | 66.1(4)   |
| C8  | C7  | C18 | F3  | -53.1(4)  |  | C8'  | C7'  | C18' | F3'  | -173.8(3) |
| C8  | C9  | C10 | C11 | 169.5(3)  |  | C8'  | C9'  | C10' | C11' | 169.1(3)  |
| C8  | C9  | C10 | C15 | -10.1(5)  |  | C8'  | C9'  | C10' | C15' | -10.3(5)  |
| C8  | C9  | O1  | C6  | 3.5(3)    |  | C8'  | C9'  | O1'  | C6'  | 3.2(3)    |
| C9  | C10 | C11 | C12 | -179.7(3) |  | C9'  | C10' | C11' | C12' | -179.3(3) |
| C9  | C10 | C15 | C14 | 179.6(3)  |  | C9'  | C10' | C15' | C14' | 179.8(3)  |
| C10 | C9  | O1  | C6  | -175.5(2) |  | C10' | C9'  | O1'  | C6'  | -175.0(2) |
| C10 | C11 | C12 | C13 | 0.3(6)    |  | C10' | C11' | C12' | C13' | -0.1(6)   |
| C11 | C10 | C15 | C14 | 0.1(5)    |  | C11' | C10' | C15' | C14' | 0.3(5)    |
| C11 | C12 | C13 | C14 | -0.4(6)   |  | C11' | C12' | C13' | C14' | -0.3(6)   |
| C12 | C13 | C14 | C15 | 0.3(5)    |  | C12' | C13' | C14' | C15' | 0.7(5)    |
| C13 | C14 | C15 | C10 | -0.2(5)   |  | C13' | C14' | C15' | C10' | -0.7(5)   |
| C15 | C10 | C11 | C12 | -0.1(5)   |  | C15' | C10' | C11' | C12' | 0.1(5)    |
| C16 | C2  | C3  | C4  | 149.4(4)  |  | C16' | C2'  | C3'  | C4'  | 149.5(3)  |
| C17 | C4  | C5  | C6  | -157.6(3) |  | C17' | C4'  | C5'  | C6'  | -156.3(3) |
| C18 | C7  | C8  | C9  | 113.1(3)  |  | C18' | C7'  | C8'  | C9'  | 113.1(3)  |
| O1  | C6  | C7  | C1  | 127.0(3)  |  | O1'  | C6'  | C7'  | C1'  | 126.6(3)  |
| O1  | C6  | C7  | C8  | 7.0(3)    |  | O1'  | C6'  | C7'  | C8'  | 7.1(3)    |
| O1  | C6  | C7  | C18 | -107.9(3) |  | O1'  | C6'  | C7'  | C18' | -107.9(3) |
| O1  | C9  | C10 | C11 | -11.9(4)  |  | O1'  | C9'  | C10' | C11' | -13.1(4)  |
| O1  | C9  | C10 | C15 | 168.6(3)  |  | O1'  | C9'  | C10' | C15' | 167.5(3)  |

Table S17 Hydrogen Atom Coordinates ( $\text{\AA} \times 10^4$ ) and Isotropic Displacement Parameters( $\text{\AA}^2 \times 10^3$ ) for **2za**.

| Atom | x     | y    | z    | U(eq) |
|------|-------|------|------|-------|
| H1   | 962   | 2824 | 7536 | 68    |
| H3   | -1601 | 769  | 9521 | 76    |
| H5   | -936  | -782 | 7813 | 67    |

|      |       |       |      |     |
|------|-------|-------|------|-----|
| H8   | 3722  | 2419  | 6370 | 67  |
| H11  | 1939  | -294  | 5360 | 79  |
| H12  | 2663  | -194  | 4000 | 90  |
| H13  | 4093  | 1310  | 3109 | 88  |
| H14  | 4789  | 2765  | 3569 | 88  |
| H15  | 4080  | 2695  | 4922 | 77  |
| H16A | -3038 | 2639  | 8783 | 122 |
| H16B | -1236 | 3426  | 8393 | 122 |
| H16C | -1432 | 2762  | 9288 | 122 |
| H17A | -3316 | -1238 | 9284 | 125 |
| H17B | -2063 | -1031 | 9902 | 125 |
| H17C | -1232 | -1701 | 9292 | 125 |
| H1'  | 8256  | 2174  | 2455 | 67  |
| H3'  | 7483  | 4235  | 456  | 74  |
| H5'  | 6625  | 5810  | 2152 | 68  |
| H8'  | 9970  | 2580  | 3635 | 65  |
| H11' | 7277  | 5312  | 4624 | 79  |
| H12' | 6776  | 5222  | 5985 | 91  |
| H13' | 7367  | 3692  | 6885 | 88  |
| H14' | 8437  | 2225  | 6432 | 88  |
| H15' | 8983  | 2307  | 5074 | 81  |
| H16D | 6824  | 1593  | 1602 | 116 |
| H16E | 7434  | 2239  | 704  | 116 |
| H16F | 5378  | 2384  | 1192 | 116 |
| H17D | 5847  | 6468  | 790  | 133 |
| H17E | 6862  | 5972  | 96   | 133 |
| H17F | 8115  | 6612  | 501  | 133 |

(3) X-ray crystallographic analysis of a single crystal of compound **6b** (CCDC 2286090).

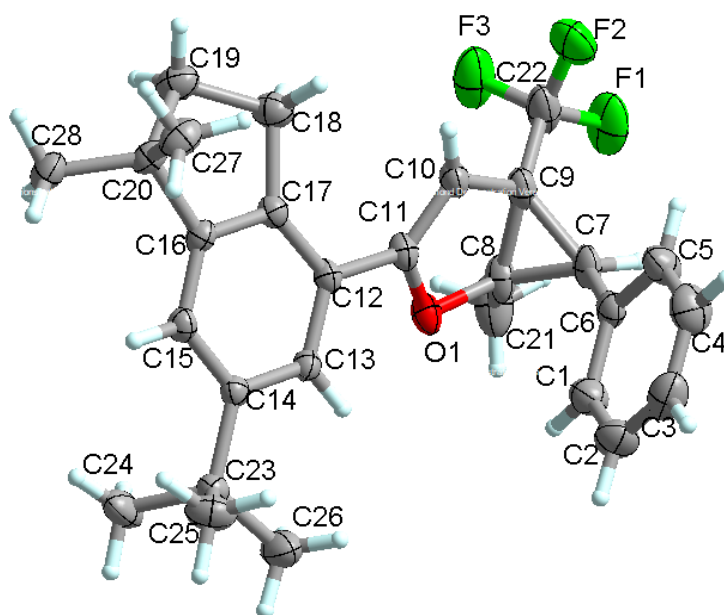

**Fig. S18.** Relative configuration of product **6b**

Displacement ellipsoids are drawn at the 30% probability level.

(Solvents: dichloromethane/petroleum ether = 1:10)

**Table S18** Crystal data and structure refinement for **6b** (CCDC 2286090).

|                                  |                                                  |
|----------------------------------|--------------------------------------------------|
| Identification code              |                                                  |
| Empirical formula                | C <sub>28</sub> H <sub>31</sub> F <sub>3</sub> O |
| Formula weight                   | 440.53                                           |
| Temperature/K                    | 293(2)                                           |
| Crystal system                   | triclinic                                        |
| Space group                      | P-1                                              |
| a/Å                              | 9.1987(6)                                        |
| b/Å                              | 11.0072(6)                                       |
| c/Å                              | 12.2093(6)                                       |
| $\alpha$ /°                      | 90.074(4)                                        |
| $\beta$ /°                       | 92.871(4)                                        |
| $\gamma$ /°                      | 96.049(5)                                        |
| Volume/Å <sup>3</sup>            | 1227.76(12)                                      |
| Z                                | 2                                                |
| $\rho_{\text{calc}}/\text{cm}^3$ | 1.192                                            |
| $\mu/\text{mm}^{-1}$             | 0.706                                            |
| F(000)                           | 468.0                                            |
| Crystal size/mm <sup>3</sup>     | 0.16 × 0.11 × 0.1                                |

|                                                  |                                                               |
|--------------------------------------------------|---------------------------------------------------------------|
| Radiation                                        | CuK $\alpha$ ( $\lambda = 1.54184$ )                          |
| 2 $\Theta$ range for data collection/ $^{\circ}$ | 7.25 to 134.138                                               |
| Index ranges                                     | $-10 \leq h \leq 10, -13 \leq k \leq 13, -14 \leq l \leq 9$   |
| Reflections collected                            | 8391                                                          |
| Independent reflections                          | 4357 [ $R_{\text{int}} = 0.0295, R_{\text{sigma}} = 0.0382$ ] |
| Data/restraints/parameters                       | 4357/0/295                                                    |
| Goodness-of-fit on $F^2$                         | 1.036                                                         |
| Final R indexes [ $I \geq 2\sigma(I)$ ]          | $R_1 = 0.0731, wR_2 = 0.2102$                                 |
| Final R indexes [all data]                       | $R_1 = 0.0858, wR_2 = 0.2280$                                 |
| Largest diff. peak/hole / $e \text{ \AA}^{-3}$   | 0.67/-0.26                                                    |

Table S19 Fractional Atomic Coordinates ( $\times 10^4$ ) and Equivalent Isotropic Displacement Parameters ( $\text{\AA}^2 \times 10^3$ ) for **6b**.  $U_{\text{eq}}$  is defined as 1/3 of of the trace of the orthogonalised  $U_{ij}$  tensor.

| Atom | x          | y          | z           | $U(\text{eq})$ |
|------|------------|------------|-------------|----------------|
| F1   | 6396(4)    | 3806(2)    | 4144.7(19)  | 129.6(11)      |
| F2   | 8724(4)    | 3850(3)    | 4284.1(19)  | 125.8(10)      |
| F3   | 7646(4)    | 5040(2)    | 5265(2)     | 134.7(12)      |
| O1   | 6664.5(19) | 2530.4(19) | 7525.7(14)  | 61.3(5)        |
| C1   | 6290(4)    | -166(3)    | 6657(3)     | 75.4(8)        |
| C2   | 6628(5)    | -1337(3)   | 6842(3)     | 88.3(10)       |
| C3   | 7577(5)    | -1832(3)   | 6208(3)     | 88.9(11)       |
| C4   | 8214(5)    | -1150(4)   | 5393(3)     | 94.7(11)       |
| C5   | 7894(4)    | 39(3)      | 5207(3)     | 77.8(9)        |
| C6   | 6905(3)    | 546(2)     | 5839.0(19)  | 55.2(6)        |
| C7   | 6452(3)    | 1763(3)    | 5589(2)     | 62.8(7)        |
| C8   | 6122(3)    | 2675(3)    | 6426(2)     | 66.6(8)        |
| C9   | 7452(4)    | 2964(3)    | 5743(2)     | 64.2(7)        |
| C10  | 8694(3)    | 2954(3)    | 6563.8(19)  | 58.0(6)        |
| C11  | 8169(3)    | 2698(2)    | 7545.5(19)  | 51.3(6)        |
| C12  | 8916(2)    | 2587(2)    | 8631.2(17)  | 45.7(5)        |
| C13  | 8238(2)    | 1878(2)    | 9434.9(18)  | 44.9(5)        |
| C14  | 8897(3)    | 1763(2)    | 10476.4(17) | 45.2(5)        |
| C15  | 10281(3)   | 2389(2)    | 10704.2(18) | 48.1(5)        |
| C16  | 10960(2)   | 3115(2)    | 9918.0(19)  | 46.3(5)        |
| C17  | 10288(2)   | 3221(2)    | 8882.4(18)  | 46.4(5)        |

|     |          |         |             |           |
|-----|----------|---------|-------------|-----------|
| C18 | 11262(3) | 4127(3) | 8230(3)     | 72.1(8)   |
| C19 | 12345(4) | 4794(3) | 9117(3)     | 73.9(8)   |
| C20 | 12447(3) | 3863(2) | 10042(2)    | 55.8(6)   |
| C21 | 4713(5)  | 3293(4) | 6389(3)     | 107.7(16) |
| C22 | 7547(6)  | 3909(3) | 4873(3)     | 91.6(12)  |
| C23 | 8105(3)  | 993(2)  | 11354.0(19) | 51.4(6)   |
| C24 | 7786(5)  | 1836(3) | 12285(3)    | 89.6(11)  |
| C25 | 9029(4)  | 28(3)   | 11782(3)    | 84.5(10)  |
| C26 | 6630(4)  | 368(4)  | 10899(3)    | 91.2(11)  |
| C27 | 13648(3) | 3032(3) | 9853(3)     | 74.8(8)   |
| C28 | 12730(3) | 4471(3) | 11171(3)    | 70.9(8)   |

Table S20 Anisotropic Displacement Parameters ( $\text{\AA}^2 \times 10^3$ ) for **6b**. The Anisotropic displacement factor exponent takes the form:  $-2\pi^2[h^2a^{*2}U_{11}+2hka^*b^*U_{12}+\dots]$ .

| Atom | U11      | U22       | U33      | U23       | U13       | U12      |
|------|----------|-----------|----------|-----------|-----------|----------|
| F1   | 202(3)   | 101.0(16) | 80.9(14) | 15.2(12)  | -66.3(17) | 27.7(17) |
| F2   | 189(3)   | 115.4(19) | 68.6(13) | 20.9(12)  | 10.4(16)  | -4.6(18) |
| F3   | 242(4)   | 64.7(13)  | 94.7(16) | -1.5(11)  | -39.8(19) | 25.8(16) |
| O1   | 54.8(10) | 85.1(13)  | 45.1(9)  | -10.0(8)  | -10.0(7)  | 19.1(9)  |
| C1   | 76.7(19) | 85(2)     | 64.3(17) | 4.8(15)   | 9.8(14)   | 4.5(16)  |
| C2   | 108(3)   | 77(2)     | 77(2)    | 22.4(17)  | -0.6(19)  | -1.2(19) |
| C3   | 109(3)   | 66.3(19)  | 89(2)    | 2.7(18)   | -28(2)    | 13.4(18) |
| C4   | 103(3)   | 94(3)     | 93(3)    | -14(2)    | 7(2)      | 34(2)    |
| C5   | 98(2)    | 78(2)     | 60.1(16) | 1.9(14)   | 17.4(16)  | 16.7(17) |
| C6   | 61.0(14) | 61.9(15)  | 41.1(11) | -3.9(10)  | -10.2(10) | 5.0(11)  |
| C7   | 74.7(17) | 69.9(17)  | 42.8(12) | -5.6(11)  | -18.5(11) | 13.3(13) |
| C8   | 71.0(17) | 76.9(18)  | 53.6(14) | -12.1(13) | -21.9(12) | 27.4(14) |
| C9   | 90(2)    | 60.3(15)  | 41.9(12) | -3.6(11)  | -11.3(12) | 14.0(13) |
| C10  | 67.4(16) | 65.6(16)  | 40.1(12) | -5.8(11)  | -3.0(11)  | 5.4(12)  |
| C11  | 51.9(13) | 60.4(14)  | 42.8(12) | -7.5(10)  | -4.4(10)  | 14.2(10) |
| C12  | 46.9(12) | 53.0(12)  | 38.1(11) | -4.2(9)   | -2.9(9)   | 11.2(9)  |
| C13  | 40.6(11) | 49.9(12)  | 43.3(11) | -6.9(9)   | -1.0(8)   | 2.5(9)   |
| C14  | 50.5(12) | 44.1(11)  | 41.3(11) | -4.2(9)   | 3.7(9)    | 5.5(9)   |
| C15  | 53.3(13) | 49.3(12)  | 41.1(11) | -0.6(9)   | -7.1(9)   | 6.7(10)  |
| C16  | 44.2(11) | 43.0(11)  | 51.1(12) | -2.7(9)   | -5.1(9)   | 5.1(9)   |

|     |          |          |          |          |           |          |
|-----|----------|----------|----------|----------|-----------|----------|
| C17 | 46.2(12) | 48.8(12) | 44.9(12) | 1.3(9)   | -0.3(9)   | 8.8(9)   |
| C18 | 70.6(18) | 76.3(19) | 69.0(18) | 14.7(14) | 2.8(14)   | 6.5(14)  |
| C19 | 68.4(17) | 67.1(18) | 84(2)    | 17.0(15) | -3.3(15)  | -1.4(14) |
| C20 | 46.5(13) | 50.1(13) | 68.6(15) | -0.1(11) | -6.0(11)  | -0.7(10) |
| C21 | 109(3)   | 127(3)   | 94(3)    | -33(2)   | -40(2)    | 67(3)    |
| C22 | 152(4)   | 66(2)    | 54.4(17) | -2.6(14) | -15(2)    | 12(2)    |
| C23 | 57.6(14) | 53.2(13) | 43.2(12) | 1.2(10)  | 6.4(10)   | 2.2(10)  |
| C24 | 126(3)   | 80(2)    | 66.7(19) | -2.5(16) | 41(2)     | 10(2)    |
| C25 | 85(2)    | 78(2)    | 94(2)    | 33.9(18) | 17.1(18)  | 17.3(17) |
| C26 | 83(2)    | 107(3)   | 77(2)    | 8.2(19)  | 1.1(17)   | -20(2)   |
| C27 | 50.2(15) | 73.1(19) | 100(2)   | -2.2(16) | -1.1(14)  | 5.9(13)  |
| C28 | 69.3(17) | 60.4(16) | 78.3(19) | -8.5(14) | -15.3(14) | -6.5(13) |

Table S21 Bond Lengths for **6b**.

| Atom | Atom | Length/Å |  | Atom | Atom | Length/Å |
|------|------|----------|--|------|------|----------|
| F1   | C22  | 1.343(5) |  | C10  | C11  | 1.334(4) |
| F2   | C22  | 1.337(5) |  | C11  | C12  | 1.473(3) |
| F3   | C22  | 1.325(4) |  | C12  | C13  | 1.387(3) |
| O1   | C8   | 1.423(3) |  | C12  | C17  | 1.396(3) |
| O1   | C11  | 1.376(3) |  | C13  | C14  | 1.393(3) |
| C1   | C2   | 1.375(5) |  | C14  | C15  | 1.397(3) |
| C1   | C6   | 1.377(4) |  | C14  | C23  | 1.532(3) |
| C2   | C3   | 1.351(6) |  | C15  | C16  | 1.381(3) |
| C3   | C4   | 1.365(6) |  | C16  | C17  | 1.390(3) |
| C4   | C5   | 1.388(5) |  | C16  | C20  | 1.521(3) |
| C5   | C6   | 1.382(4) |  | C17  | C18  | 1.522(4) |
| C6   | C7   | 1.472(4) |  | C18  | C19  | 1.563(5) |
| C7   | C8   | 1.495(4) |  | C19  | C20  | 1.532(4) |
| C7   | C9   | 1.534(4) |  | C20  | C27  | 1.532(4) |
| C8   | C9   | 1.521(5) |  | C20  | C28  | 1.530(4) |
| C8   | C21  | 1.525(4) |  | C23  | C24  | 1.526(4) |
| C9   | C10  | 1.483(4) |  | C23  | C25  | 1.507(4) |
| C9   | C22  | 1.487(5) |  | C23  | C26  | 1.533(4) |

Table S22 Bond Angles for **6b**.



| Atom | Atom | Atom | Angle/°   |  | Atom | Atom | Atom | Angle/°  |
|------|------|------|-----------|--|------|------|------|----------|
| C11  | O1   | C8   | 108.2(2)  |  | C12  | C13  | C14  | 121.9(2) |
| C2   | C1   | C6   | 121.9(3)  |  | C13  | C14  | C15  | 118.2(2) |
| C3   | C2   | C1   | 120.3(3)  |  | C13  | C14  | C23  | 120.7(2) |
| C2   | C3   | C4   | 119.4(3)  |  | C15  | C14  | C23  | 121.1(2) |
| C3   | C4   | C5   | 120.8(4)  |  | C16  | C15  | C14  | 120.5(2) |
| C6   | C5   | C4   | 120.2(3)  |  | C15  | C16  | C17  | 120.6(2) |
| C1   | C6   | C5   | 117.3(3)  |  | C15  | C16  | C20  | 126.9(2) |
| C1   | C6   | C7   | 121.6(3)  |  | C17  | C16  | C20  | 112.6(2) |
| C5   | C6   | C7   | 120.9(3)  |  | C12  | C17  | C18  | 131.9(2) |
| C6   | C7   | C8   | 124.9(2)  |  | C16  | C17  | C12  | 119.9(2) |
| C6   | C7   | C9   | 124.4(2)  |  | C16  | C17  | C18  | 108.1(2) |
| C8   | C7   | C9   | 60.2(2)   |  | C17  | C18  | C19  | 104.1(2) |
| O1   | C8   | C7   | 117.9(2)  |  | C20  | C19  | C18  | 104.6(2) |
| O1   | C8   | C9   | 106.6(2)  |  | C16  | C20  | C19  | 102.0(2) |
| O1   | C8   | C21  | 111.2(3)  |  | C16  | C20  | C27  | 109.2(2) |
| C7   | C8   | C9   | 61.13(19) |  | C16  | C20  | C28  | 112.7(2) |
| C7   | C8   | C21  | 123.3(2)  |  | C19  | C20  | C27  | 111.2(3) |
| C9   | C8   | C21  | 127.9(3)  |  | C28  | C20  | C19  | 112.5(2) |
| C8   | C9   | C7   | 58.62(19) |  | C28  | C20  | C27  | 109.1(2) |
| C10  | C9   | C7   | 116.3(2)  |  | F1   | C22  | C9   | 113.6(4) |
| C10  | C9   | C8   | 103.0(2)  |  | F2   | C22  | F1   | 105.6(3) |
| C10  | C9   | C22  | 118.3(3)  |  | F2   | C22  | C9   | 111.7(3) |
| C22  | C9   | C7   | 121.5(2)  |  | F3   | C22  | F1   | 106.0(3) |
| C22  | C9   | C8   | 123.8(3)  |  | F3   | C22  | F2   | 106.0(4) |
| C11  | C10  | C9   | 108.9(3)  |  | F3   | C22  | C9   | 113.2(3) |
| O1   | C11  | C12  | 115.5(2)  |  | C14  | C23  | C26  | 111.3(2) |
| C10  | C11  | O1   | 113.2(2)  |  | C24  | C23  | C14  | 108.6(2) |
| C10  | C11  | C12  | 131.3(2)  |  | C24  | C23  | C26  | 107.1(3) |
| C13  | C12  | C11  | 120.1(2)  |  | C25  | C23  | C14  | 110.6(2) |
| C13  | C12  | C17  | 118.9(2)  |  | C25  | C23  | C24  | 110.3(3) |
| C17  | C12  | C11  | 121.0(2)  |  | C25  | C23  | C26  | 108.8(3) |

Table S22 Torsion Angles for **6b**.

| A | B | C | D | Angle/° |  | A | B | C | D | Angle/° |
|---|---|---|---|---------|--|---|---|---|---|---------|
|---|---|---|---|---------|--|---|---|---|---|---------|

|    |     |     |     |           |  |     |     |     |     |           |
|----|-----|-----|-----|-----------|--|-----|-----|-----|-----|-----------|
| O1 | C8  | C9  | C7  | 113.2(2)  |  | C10 | C11 | C12 | C13 | -155.0(3) |
| O1 | C8  | C9  | C10 | 0.1(3)    |  | C10 | C11 | C12 | C17 | 27.1(4)   |
| O1 | C8  | C9  | C22 | -137.7(3) |  | C11 | O1  | C8  | C7  | 65.2(3)   |
| O1 | C11 | C12 | C13 | 26.2(3)   |  | C11 | O1  | C8  | C9  | -0.4(3)   |
| O1 | C11 | C12 | C17 | -151.7(2) |  | C11 | O1  | C8  | C21 | -143.9(3) |
| C1 | C2  | C3  | C4  | 1.1(6)    |  | C11 | C12 | C13 | C14 | -179.0(2) |
| C1 | C6  | C7  | C8  | 39.8(4)   |  | C11 | C12 | C17 | C16 | 179.0(2)  |
| C1 | C6  | C7  | C9  | 115.0(3)  |  | C11 | C12 | C17 | C18 | 2.6(4)    |
| C2 | C1  | C6  | C5  | -0.5(5)   |  | C12 | C13 | C14 | C15 | 0.1(3)    |
| C2 | C1  | C6  | C7  | 175.2(3)  |  | C12 | C13 | C14 | C23 | 178.8(2)  |
| C2 | C3  | C4  | C5  | -0.3(6)   |  | C12 | C17 | C18 | C19 | 161.4(3)  |
| C3 | C4  | C5  | C6  | -0.9(6)   |  | C13 | C12 | C17 | C16 | 1.2(3)    |
| C4 | C5  | C6  | C1  | 1.2(5)    |  | C13 | C12 | C17 | C18 | -175.3(3) |
| C4 | C5  | C6  | C7  | -174.4(3) |  | C13 | C14 | C15 | C16 | 1.0(3)    |
| C5 | C6  | C7  | C8  | -144.7(3) |  | C13 | C14 | C23 | C24 | -114.7(3) |
| C5 | C6  | C7  | C9  | -69.5(4)  |  | C13 | C14 | C23 | C25 | 124.1(3)  |
| C6 | C1  | C2  | C3  | -0.7(6)   |  | C13 | C14 | C23 | C26 | 3.0(4)    |
| C6 | C7  | C8  | O1  | 18.9(5)   |  | C14 | C15 | C16 | C17 | -0.9(3)   |
| C6 | C7  | C8  | C9  | 113.3(3)  |  | C14 | C15 | C16 | C20 | 179.2(2)  |
| C6 | C7  | C8  | C21 | -128.2(4) |  | C15 | C14 | C23 | C24 | 63.9(3)   |
| C6 | C7  | C9  | C8  | -114.1(3) |  | C15 | C14 | C23 | C25 | -57.2(3)  |
| C6 | C7  | C9  | C10 | -24.5(4)  |  | C15 | C14 | C23 | C26 | -178.4(3) |
| C6 | C7  | C9  | C22 | 133.0(3)  |  | C15 | C16 | C17 | C12 | -0.2(3)   |
| C7 | C8  | C9  | C10 | -113.1(2) |  | C15 | C16 | C17 | C18 | 177.1(2)  |
| C7 | C8  | C9  | C22 | 109.1(3)  |  | C15 | C16 | C20 | C19 | -159.8(3) |
| C7 | C9  | C10 | C11 | -61.0(3)  |  | C15 | C16 | C20 | C27 | 82.4(3)   |
| C7 | C9  | C22 | F1  | 20.2(5)   |  | C15 | C16 | C20 | C28 | -39.0(3)  |
| C7 | C9  | C22 | F2  | -99.2(4)  |  | C16 | C17 | C18 | C19 | -15.3(3)  |
| C7 | C9  | C22 | F3  | 141.3(4)  |  | C17 | C12 | C13 | C14 | -1.2(3)   |
| C8 | O1  | C11 | C10 | 0.6(3)    |  | C17 | C16 | C20 | C19 | 20.3(3)   |
| C8 | O1  | C11 | C12 | 179.6(2)  |  | C17 | C16 | C20 | C27 | -97.4(3)  |
| C8 | C7  | C9  | C10 | 89.6(3)   |  | C17 | C16 | C20 | C28 | 141.1(2)  |
| C8 | C7  | C9  | C22 | -112.9(4) |  | C17 | C18 | C19 | C20 | 27.5(3)   |
| C8 | C9  | C10 | C11 | 0.2(3)    |  | C18 | C19 | C20 | C16 | -28.4(3)  |
| C8 | C9  | C22 | F1  | -50.8(4)  |  | C18 | C19 | C20 | C27 | 87.9(3)   |

|     |     |     |     |           |  |     |     |     |     |           |
|-----|-----|-----|-----|-----------|--|-----|-----|-----|-----|-----------|
| C8  | C9  | C22 | F2  | -170.2(3) |  | C18 | C19 | C20 | C28 | -149.3(3) |
| C8  | C9  | C22 | F3  | 70.2(5)   |  | C20 | C16 | C17 | C12 | 179.7(2)  |
| C9  | C7  | C8  | O1  | -94.4(3)  |  | C20 | C16 | C17 | C18 | -3.1(3)   |
| C9  | C7  | C8  | C21 | 118.5(4)  |  | C21 | C8  | C9  | C7  | -111.5(3) |
| C9  | C10 | C11 | O1  | -0.5(3)   |  | C21 | C8  | C9  | C10 | 135.5(3)  |
| C9  | C10 | C11 | C12 | -179.4(2) |  | C21 | C8  | C9  | C22 | -2.3(5)   |
| C10 | C9  | C22 | F1  | 177.3(3)  |  | C22 | C9  | C10 | C11 | 140.8(3)  |
| C10 | C9  | C22 | F2  | 57.9(4)   |  | C23 | C14 | C15 | C16 | -177.7(2) |
| C10 | C9  | C22 | F3  | -61.7(5)  |  |     |     |     |     |           |

Table S23 Hydrogen Atom Coordinates ( $\text{\AA}\times 10^4$ ) and Isotropic Displacement Parameters ( $\text{\AA}^2\times 10^3$ ) for **6b**.

| Atom | x     | y     | z     | U(eq) |
|------|-------|-------|-------|-------|
| H1   | 5626  | 156   | 7097  | 90    |
| H2   | 6202  | -1791 | 7406  | 106   |
| H3   | 7794  | -2629 | 6325  | 107   |
| H4   | 8871  | -1486 | 4956  | 114   |
| H5   | 8347  | 497   | 4656  | 93    |
| H7   | 5802  | 1762  | 4928  | 75    |
| H10  | 9680  | 3102  | 6418  | 70    |
| H13  | 7316  | 1467  | 9274  | 54    |
| H15  | 10748 | 2317  | 11391 | 58    |
| H18A | 10690 | 4701  | 7847  | 86    |
| H18B | 11786 | 3707  | 7700  | 86    |
| H19A | 13296 | 5016  | 8824  | 89    |
| H19B | 11970 | 5528  | 9379  | 89    |
| H21A | 3966  | 2783  | 6741  | 162   |
| H21B | 4401  | 3419  | 5639  | 162   |
| H21C | 4885  | 4066  | 6763  | 162   |
| H24A | 8690  | 2179  | 12641 | 134   |
| H24B | 7205  | 1378  | 12806 | 134   |
| H24C | 7260  | 2482  | 11993 | 134   |
| H25A | 9257  | -475  | 11184 | 127   |
| H25B | 8499  | -469  | 12306 | 127   |
| H25C | 9920  | 413   | 12129 | 127   |

---

|      |       |      |       |     |
|------|-------|------|-------|-----|
| H26A | 6033  | 976  | 10624 | 137 |
| H26B | 6144  | -82  | 11473 | 137 |
| H26C | 6789  | -180 | 10316 | 137 |
| H27A | 13558 | 2359 | 10353 | 112 |
| H27B | 14590 | 3488 | 9974  | 112 |
| H27C | 13546 | 2727 | 9113  | 112 |
| H28A | 11905 | 4890 | 11342 | 106 |
| H28B | 13591 | 5044 | 11165 | 106 |
| H28C | 12870 | 3858 | 11714 | 106 |

## 9. Characterization of some starting substrates

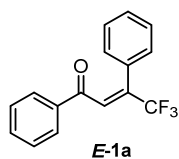

**(E)-4,4,4-trifluoro-1,3-diphenylbut-2-en-1-one ((E)-1a)**<sup>15</sup>: yellow oil; 83% yield; <sup>1</sup>H NMR (600 MHz, CDCl<sub>3</sub>) δ 7.66 (d, *J* = 7.8 Hz, 2H), 7.31 (t, *J* = 7.5 Hz, 1H), 7.19 (t, *J* = 7.7 Hz, 2H), 7.13 (d, *J* = 7.5 Hz, 3H), 7.06 (d, *J* = 7.1 Hz, 3H); <sup>13</sup>C NMR (151 MHz, CDCl<sub>3</sub>) δ 191.8, 138.6 (q, *J* = 30.8 Hz), 135.9, 133.7, 130.9 (q, *J* = 5.2 Hz), 130.7, 129.2, 128.9, 128.7, 128.5, 128.2, 122.8 (q, *J* = 274.8 Hz); <sup>19</sup>F NMR (565 MHz, CDCl<sub>3</sub>) δ -66.1; HRMS (ESI) *m/z* 277.0835 (M+H<sup>+</sup>), calc. for C<sub>16</sub>H<sub>11</sub>F<sub>3</sub>O 277.0837.

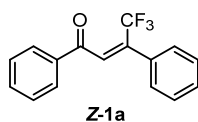

**(Z)-4,4,4-trifluoro-1,3-diphenylbut-2-en-1-one ((Z)-1a)**: yellow oil; 43% yield; <sup>1</sup>H NMR (300 MHz, CDCl<sub>3</sub>) δ 8.00 (d, *J* = 8.3 Hz, 2H), 7.65 (t, *J* = 7.4 Hz, 1H), 7.58 – 7.49 (m, 4H), 7.48 – 7.42 (m, 3H), 6.84 (s, 1H); <sup>13</sup>C NMR (75 MHz, CDCl<sub>3</sub>) δ 192.5, 136.1, 135.6, 134.4 (q, *J* = 3.6 Hz), 134.2, 133.5, 129.6, 129.2, 128.9, 128.8, 127.8, 122.6 (q, *J* = 276.2 Hz); <sup>19</sup>F NMR (565 MHz, CDCl<sub>3</sub>) δ -66.0; HRMS (ESI) *m/z* 277.0835 (M+H<sup>+</sup>), calc. for C<sub>16</sub>H<sub>11</sub>F<sub>3</sub>O 277.0834.

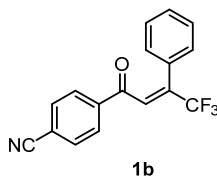

**(E)-4-(4,4,4-trifluoro-3-phenylbut-2-enoyl)benzonitrile (1b)**: yellow oil; 78% yield; <sup>1</sup>H NMR (300 MHz, CDCl<sub>3</sub>) δ 7.81 (d, *J* = 8.4 Hz, 2H), 7.61 (d, *J* = 8.4 Hz, 2H), 7.31 – 7.09 (m, 6H); <sup>13</sup>C NMR (75 MHz, CDCl<sub>3</sub>) δ 191.0, 140.5 (q, *J* = 31.1 Hz), 138.9, 132.4, 130.4, 129.9, 129.6 (q, *J* = 5.0 Hz), 129.1, 129.0, 128.5, 122.6 (q, *J* = 275.1 Hz), 117.6, 116.8; <sup>19</sup>F NMR (376 MHz, CDCl<sub>3</sub>) δ -66.0; HRMS (ESI) *m/z* 302.0787 (M+H<sup>+</sup>), calc. for C<sub>16</sub>H<sub>11</sub>F<sub>3</sub>O 302.0783.

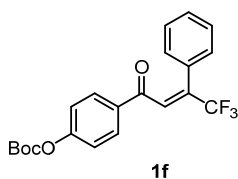

**(E)-tert-butyl (4-(4,4,4-trifluoro-3-phenylbut-2-enoyl)phenyl) carbonate (1f)**: yellow solid; Mp 75.6 – 76.3 °C; 85% yield; <sup>1</sup>H NMR (300 MHz, CDCl<sub>3</sub>) δ 7.89 (d, *J* = 6.8 Hz, 2H), 7.35 – 7.25 (m, 6.730 – 7.15 (m, 2H), 1.60 (s, 9H); <sup>13</sup>C NMR (75 MHz, CDCl<sub>3</sub>) δ 190.6, 155.2, 150.7, 138.9 (q, *J* = 30.8 Hz), 133.3, 130.6 (q, *J* = 5.5 Hz), 130.4, 129.4, 128.9, 128.3, 122.8 (q, *J* = 274.8 Hz), 121.3, 84.2, 27.5; <sup>19</sup>F NMR (376 MHz, CDCl<sub>3</sub>) δ -65.6; HRMS (ESI) *m/z* 393.1308 (M+H<sup>+</sup>), calc. for C<sub>16</sub>H<sub>11</sub>F<sub>3</sub>O 393.1310.

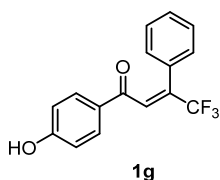

**(E)-4,4,4-trifluoro-1-(4-hydroxyphenyl)-3-phenylbut-2-en-1-**

**one (1g):** yellow solid; Mp 98.0 – 99.2 °C; 79% yield; <sup>1</sup>H NMR (300 MHz, CDCl<sub>3</sub>) δ 7.80 (d, *J* = 8.5 Hz, 2H), 7.41 – 6.91 (m, 6H), 6.81 (d, *J* = 2.0 Hz, 2H), 6.33 – 5.95 (m, 1H); <sup>13</sup>C NMR (75 MHz, CDCl<sub>3</sub>) δ 191.0,

161.0, 131.8, 131.0, 130.9 (q, *J* = 3.9 Hz), 129.4, 129.1, 129.0, 128.4, 120.4 (q, *J* = 273.9 Hz), 115.6; <sup>19</sup>F NMR (376 MHz, CDCl<sub>3</sub>) δ -66.0; HRMS (ESI) *m/z* 293.0784 (M+H<sup>+</sup>), calc. for C<sub>16</sub>H<sub>11</sub>F<sub>3</sub>O 293.0788.

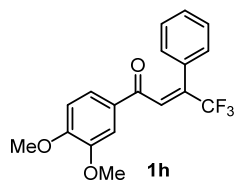

**(E)-1-(3,4-dimethoxyphenyl)-4,4,4-trifluoro-3-phenylbut-2-en-**

**1-one (1h):** yellow solid; Mp 76.3 – 77.8 °C; 83% yield; <sup>1</sup>H NMR (300 MHz, CDCl<sub>3</sub>) δ 7.45 (d, *J* = 2.2 Hz, 1H), 7.34 (d, *J* = 2.2 Hz, 1H), 7.29 – 7.18 (m, 7H), 6.80 (d, *J* = 2.5 Hz, 1H), 3.90 (s, 3H), 3.84 (s, 3H); <sup>13</sup>C

NMR (75 MHz, CDCl<sub>3</sub>) δ 190.4, 154.1, 149.3, 138.1 (d, *J* = 30.3 Hz), 131.0, 130.9 (q, *J* = 5.0 Hz), 129.3, 129.0, 128.3, 124.6, 122.9 (q, *J* = 273.0 Hz) 110.2, 110.0, 56.1, 55.9; <sup>19</sup>F NMR (376 MHz, CDCl<sub>3</sub>) δ -65.4; HRMS (ESI) *m/z* 337.1046 (M+H<sup>+</sup>), calc. for C<sub>16</sub>H<sub>11</sub>F<sub>3</sub>O 337.1040.

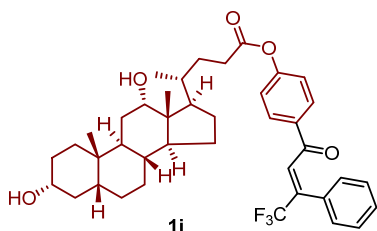

**4-((E)-4,4,4-trifluoro-3-phenylbut-2-enoyl)phenyl**

**(R)-4-((3R,5R,8R,9S,10S,12S,13R,14S,17R)-3,12-**

**dihydroxy-10,13-dimethylhexadecahydro-1H-**

**cyclopenta[a]phenanthren-17-yl)pentanoate (1i):** yellow

solid; Mp 89.3 – 91.0 °C; 83% yield; <sup>1</sup>H NMR (300 MHz, CDCl<sub>3</sub>) δ 7.86 (d, *J* = 8.7 Hz, 2H), 7.35 – 7.24 (m, 6H), 7.14 (d, *J* = 8.7 Hz, 2H), 3.68 – 3.54 (m, 2H), 2.69 – 2.45 (m, 2H), 2.07 – 1.76 (m, 8H), 1.74 – 1.42 (m, 15H), 1.34 – 1.13 (m, 6H), 0.96 (s, 3H), 0.71 (s, 3H); <sup>13</sup>C NMR (75 MHz, CDCl<sub>3</sub>) δ 190.7, 171.9, 155.0, 139.1 (q, *J* = 31.1 Hz), 133.5, 130.7, 130.5, 129.5, 129.0, 128.4, 121.9, 71.3, 55.7, 54.9, 43.8, 42.4, 40.1, 39.2, 37.3, 36.9, 35.2, 34.9, 34.1, 33.8, 31.4, 30.8, 30.3, 28.6, 26.9, 24.8, 23.4, 21.2, 18.4, 12.1; <sup>19</sup>F NMR (565 MHz, CDCl<sub>3</sub>) δ -66.8; HRMS (ESI) *m/z* 667.3605 (M+H<sup>+</sup>), calc. for C<sub>16</sub>H<sub>11</sub>F<sub>3</sub>O 667.3610.

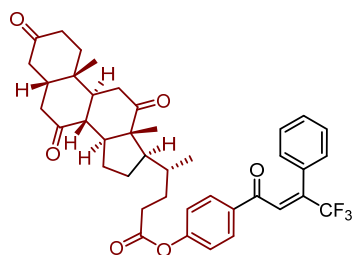

1j

4-((*E*)-4,4,4-trifluoro-3-phenylbut-2-enyl)phenyl (*R*)-4-((5*S*,8*R*,9*S*,10*S*,13*R*,14*S*,17*R*)-10,13-dimethyl-3,7,12-trioxohexadecahydro-1*H*-cyclopenta[*a*]phenanthren-17-yl)pentanoate (**1j**): yellow solid; Mp 103.3 – 104.9 °C; 83% yield; <sup>1</sup>H NMR (300 MHz, CDCl<sub>3</sub>) δ 7.89 (d, *J* = 8.7 Hz, 2H), 7.31 (s, 6H), 7.17 (d, *J* = 6.7 Hz, 2H), 3.72 – 3.67 (m, 1H), 3.67

– 3.58 (m, 2H), 3.55 – 3.45 (m, 1H), 2.72 – 2.59 (m, 1H), 2.59 – 2.47 (m, 1H), 2.42 – 2.21 (m, 1H), 2.02 – 1.78 (m, 10H), 1.71 – 1.52 (m, 10H), 1.36 – 1.14 (m, 11H), 1.00 – 0.97 (m, 3H), 0.73 (s, 3H); <sup>13</sup>C NMR (75 MHz, DMSO) δ 212.0, 209.5, 190.8, 171.7, 156.7, 154.9, 133.2, 130.6, 129.5, 128.9, 128.6, 123.1 (q, *J* = 274.0 Hz), 122.5, 56.3, 51.3, 48.0, 47.6, 46.1, 45.4, 44.6, 44.1, 42.6, 38.4, 36.2, 35.7, 35.0, 34.64, 33.4, 31.0, 30.1, 27.3, 25.4, 24.7, 24.5, 21.2, 11.5; <sup>19</sup>F NMR (376 MHz, CDCl<sub>3</sub>) δ -66.1; HRMS (ESI) *m/z* 677.3085 (M+H<sup>+</sup>), calc. for C<sub>16</sub>H<sub>11</sub>F<sub>3</sub>O 677.3080.

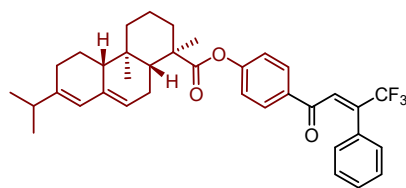

1k

4-((*E*)-4,4,4-trifluoro-3-phenylbut-2-enyl)phenyl (1*R*,4*aR*,4*bR*,10*aR*)-7-isopropyl-1,4*a*-dimethyl-1,2,3,4,4*a*,4*b*,5,6,10,10*a*-decahydrophenanthrene-1-carboxylate (**1k**): yellow solid; Mp 103.3 – 104.6 °C;

75% yield; <sup>1</sup>H NMR (300 MHz, CDCl<sub>3</sub>) δ 7.88 – 7.79 (m, 3H), 7.26 (q, *J* = 3.7 Hz, 5H), 7.20 – 7.06 (m, 2H), 6.25 (d, *J* = 16.0 Hz, 1H), 2.46 (d, *J* = 17.1 Hz, 2H), 2.28 (d, *J* = 17.4 Hz, 2H), 2.13 – 2.05 (m, 4H), 2.00 – 1.97 (m, 1H), 1.92 – 1.84 (m, 3H), 1.74 – 1.62 (m, 1H), 1.61 – 1.52 (m, 2H), 1.58 – 1.49 (m, 1H), 1.37 – 1.20 (m, 2H), 1.19 – 1.04 (m, 3H), 1.05 – 0.89 (m, 3H), 0.92 – 0.76 (m, 2H); <sup>13</sup>C NMR (75 MHz, CDCl<sub>3</sub>) δ 197.4, 190.7, 163.2, 161.9, 155.0, 153.1, 138.0, 135.7 (q, *J* = 30.5 Hz), 133.5, 130.7, 130.6 (d, *J* = 5.2 Hz), 130.5, 129.5, 128.97, 129.0, 127.8, 127.2, 122.8 (d, *J* = 274.8 Hz), 122.0, 116.7, 49.7, 49.4, 41.5, 33.7, 25.5, 24.8, 24.3, 23.0, 21.4, 18.8; <sup>19</sup>F NMR (376 MHz, CDCl<sub>3</sub>) δ -66.1; HRMS (ESI) *m/z* 577.2924 (M+H<sup>+</sup>), calc. for C<sub>16</sub>H<sub>11</sub>F<sub>3</sub>O 577.2930.

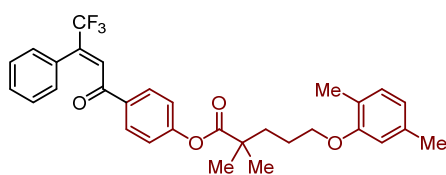

1l

(*E*)-4-(4,4,4-trifluoro-3-phenylbut-2-enyl)phenyl 5-(2,5-dimethylphenoxy)-2,2-dimethylpentanoate (**2l**): yellow solid; Mp 93.5 – 94.6 °C; 83% yield; <sup>1</sup>H NMR (300 MHz, CDCl<sub>3</sub>)

$\delta$  7.92 – 7.78 (m, 2H), 7.35 – 7.29 (m, 4H), 7.12 – 7.05 (m, 2H), 7.02 (d,  $J = 7.4$  Hz, 1H), 6.77 – 6.55 (m, 2H), 4.00 (d,  $J = 5.3$  Hz, 2H), 2.32 (s, 3H), 2.19 (s, 3H), 1.90 (s, 4H), 1.39 (s, 6H);  $^{13}\text{C}$  NMR (75 MHz,  $\text{CDCl}_3$ )  $\delta$  190.6, 175.5, 156.7, 155.3, 138.7 (q,  $J = 30.8$  Hz), 136.4, 133.3, 130.6 (q,  $J = 5.4$  Hz), 130.4, 130.3, 129.4, 128.9, 128.3, 123.4, 122.8 (q,  $J = 274.8$  Hz), 121.9, 120.7, 111.8, 67.5, 42.5, 36.9, 25.1, 24.9, 21.3, 15.7;  $^{19}\text{F}$  NMR (376 MHz,  $\text{CDCl}_3$ )  $\delta$  -65.6; HRMS (ESI)  $m/z$  525.2247 ( $\text{M}+\text{H}^+$ ), calc. for  $\text{C}_{16}\text{H}_{11}\text{F}_3\text{O}$  525.2240.

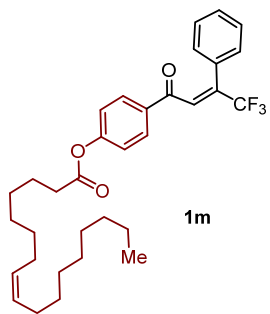

1m

**4-((*E*)-4,4,4-trifluoro-3-phenylbut-2-enoyl)phenyl (*Z*)-heptadec-8-enoate (1m):** yellow oil; 87% yield;  $^1\text{H}$  NMR (300 MHz,  $\text{CDCl}_3$ )  $\delta$  7.90 (d,  $J = 8.3$  Hz, 2H), 7.31 (d,  $J = 4.2$  Hz, 6H), 7.21 – 7.12 (m, 2H), 5.41 (d,  $J = 5.3$  Hz, 2H), 2.62 (d,  $J = 7.6$  Hz, 2H), 2.45 – 2.34 (m, 2H), 2.08 (p,  $J = 6.4$  Hz, 7H), 1.78 (d,  $J = 7.2$  Hz, 2H), 1.68 – 1.65 (m, 1H), 1.38 (dd,  $J = 22.1, 13.4$  Hz,

18H);  $^{13}\text{C}$  NMR (75 MHz,  $\text{CDCl}_3$ )  $\delta$  190.9, 179.7, 171.5, 155.1, 139.1 (q,  $J = 31.2$  Hz), 133.4, 131.7, 130.5, 130.0, 130.0 (q,  $J = 4.7$  Hz), 130.0, 129.7, 129.6, 129.5, 129.23 128.94 128.4, 128.3, 122.8 (q,  $J = 274.8$  Hz), 121.9, 115.6, 34.3, 34.0, 31.9, 29.7, 29.6, 29.5, 29.3, 29.0, 27.2, 27.1, 24.7, 24.6, 22.6, 14.1;  $^{19}\text{F}$  NMR (376 MHz,  $\text{CDCl}_3$ )  $\delta$  -66.1; HRMS (ESI)  $m/z$  543.3081 ( $\text{M}+\text{H}^+$ ), calc. for  $\text{C}_{16}\text{H}_{11}\text{F}_3\text{O}$  543.3077.

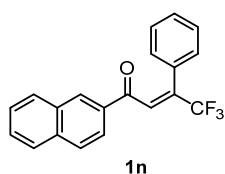

1n

**(*E*)-4,4,4-trifluoro-1-(naphthalen-2-yl)-3-phenylbut-2-en-1-one (1n)<sup>15</sup>:** yellow oil; 87% yield;  $^1\text{H}$  NMR (600 MHz,  $\text{CDCl}_3$ )  $\delta$  8.19 (s, 1H), 7.77 – 7.71 (m, 2H), 7.64 (t,  $J = 7.9$  Hz, 2H), 7.42 (t,  $J = 7.5$  Hz, 1H), 7.37 (t,  $J = 7.5$  Hz, 1H), 7.21 – 7.15 (m, 2H), 7.06 (dd,  $J = 4.6, 2.6$  Hz, 3H);  $^{13}\text{C}$

NMR (151 MHz,  $\text{CDCl}_3$ )  $\delta$  191.7, 138.7 (q,  $J = 30.8$  Hz), 135.8, 133.3, 132.2, 131.4, 131.0 (q,  $J = 5.0$  Hz), 130.8, 129.6, 129.3, 128.9, 128.3, 127.7, 126.9, 123.6, 122.9 (q,  $J = 274.5$  Hz);  $^{19}\text{F}$  NMR (565 MHz,  $\text{CDCl}_3$ )  $\delta$  -66.0; HRMS (ESI)  $m/z$  327.0991 ( $\text{M}+\text{H}^+$ ), calc. for  $\text{C}_{20}\text{H}_{13}\text{F}_3\text{O}$  327.0992.

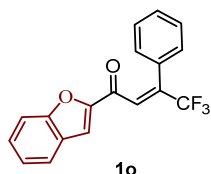

1o

**(*E*)-1-(benzofuran-2-yl)-4,4,4-trifluoro-3-phenylbut-2-en-1-one (1o):** yellow solid; Mp 55.5 – 55.9 °C; 83% yield;  $^1\text{H}$  NMR (600 MHz,  $\text{CDCl}_3$ )  $\delta$  7.68 (d,  $J = 1.0$  Hz, 1H), 7.55 (d,  $J = 0.9$  Hz, 1H), 7.51 – 7.46 (m, 2H), 7.42 (q,  $J = 1.4$  Hz, 1H), 7.38 – 7.33 (m, 5H), 7.33 – 7.28 (m, 1H);  $^{13}\text{C}$

NMR (151 MHz,  $\text{CDCl}_3$ )  $\delta$  179.9, 155.8, 152.2, 141.4 (q,  $J = 30.8$  Hz), 130.7, 129.5, 128.9,



128.8, 128.3, 127.7 (q,  $J = 5.0$  Hz), 126.8, 124.1, 123.5, 22.7 (q,  $J = 275.1$  Hz), 115.0, 112.5;  $^{19}\text{F}$  NMR (565 MHz,  $\text{CDCl}_3$ )  $\delta$  -66.8; HRMS (ESI)  $m/z$  317.0784 ( $\text{M}+\text{H}^+$ ), calc. for  $\text{C}_{20}\text{H}_{13}\text{F}_3\text{O}$  317.0784.

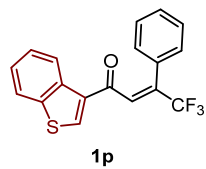

1p

**(E)-1-(benzo[b]thiophen-3-yl)-4,4,4-trifluoro-3-phenylbut-2-en-1-one**

**(2p):** yellow solid; Mp 63.7 – 64.5 °C; 83% yield;  $^1\text{H}$  NMR (300 MHz,  $\text{CDCl}_3$ )  $\delta$  8.76 (d,  $J = 7.2$  Hz, 2H), 8.35 (s, 1H), 7.94 (d,  $J = 7.0$  Hz, 1H),

7.72 – 7.52 (m, 2H), 7.50 – 7.41 (m, 4H);  $^{13}\text{C}$  NMR (75 MHz,  $\text{CDCl}_3$ )  $\delta$  186.0, 139.9, 139.8, 138.5 (q,  $J = 30.5$  Hz), 135.9, 134.6, 131.1 (q,  $J = 5.0$  Hz), 130.9, 129.4, 128.9, 128.4, 126.0, 125.8, 125.3, 122.9 (q,  $J = 275.1$  Hz), 122.2;  $^{19}\text{F}$  NMR (376 MHz,  $\text{CDCl}_3$ )  $\delta$  -66.1; HRMS (ESI)  $m/z$  333.0556 ( $\text{M}+\text{H}^+$ ), calc. for  $\text{C}_{20}\text{H}_{13}\text{F}_3\text{O}$  333.0560.

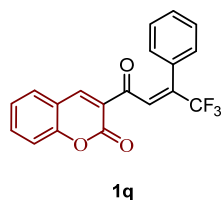

1q

**(E)-3-(4,4,4-trifluoro-3-phenylbut-2-enoyl)-2H-chromen-2-one (2q):**

yellow solid; Mp 68.9 – 70.3 °C; 72% yield;  $^1\text{H}$  NMR (600 MHz,  $\text{CDCl}_3$ )  $\delta$  8.20 (s, 1H), 7.67 – 7.62 (m, 1H), 7.55 (d,  $J = 7.8$  Hz, 1H), 7.48 (d,  $J = 2.9$  Hz, 1H), 7.35 – 7.30 (m, 2H), 7.29 (s, 5H);  $^{13}\text{C}$  NMR (151 MHz,  $\text{CDCl}_3$ )

$\delta$  188.0, 158.6, 155.2, 147.9, 139.2 (q,  $J = 30.8$  Hz), 134.8, 131.4 (q,  $J = 5.5$  Hz), 131.1, 130.1, 129.3, 129.2, 128.2, 125.1, 124.5, 122.7 (q,  $J = 274.5$  Hz), 118.0, 116.6;  $^{19}\text{F}$  NMR (565 MHz,  $\text{CDCl}_3$ )  $\delta$  -67.1; HRMS (ESI)  $m/z$  345.0733 ( $\text{M}+\text{H}^+$ ), calc. for  $\text{C}_{20}\text{H}_{13}\text{F}_3\text{O}$  345.0737.

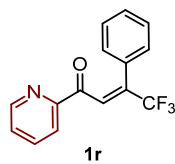

1r

**(E)-4,4,4-trifluoro-3-phenyl-1-(pyridin-2-yl)but-2-en-1-one (1r):** yellow

solid; Mp 73.8 – 74.3 °C; 89% yield;  $^1\text{H}$  NMR (300 MHz,  $\text{CDCl}_3$ )  $\delta$  8.75 (d,  $J = 3.8$  Hz, 1H), 8.13 – 8.06 (m, 1H), 7.96 (d,  $J = 7.8$  Hz, 1H), 7.84 (t,  $J = 1.7$

Hz, 1H), 7.57 – 7.48 (m, 1H), 7.47 – 7.32 (m, 5H);  $^{13}\text{C}$  NMR (75 MHz,  $\text{CDCl}_3$ )  $\delta$  190.3, 153.5, 149.1, 141.3 (q,  $J = 30.8$  Hz), 137.0, 131.5, 129.1, 128.9, 128.4 (q,  $J = 5.8$  Hz), 128.2, 127.5, 122.8 (q,  $J = 275.1$  Hz), 122.6;  $^{19}\text{F}$  NMR (376 MHz,  $\text{CDCl}_3$ )  $\delta$  -67.0; HRMS (ESI)  $m/z$  278.0787 ( $\text{M}+\text{H}^+$ ), calc. for  $\text{C}_{20}\text{H}_{13}\text{F}_3\text{O}$  278.0790.

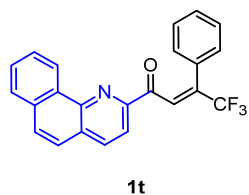

1t

**(E)-1-(benzo[h]quinolin-2-yl)-4,4,4-trifluoro-3-phenylbut-2-en-1-**

**one (1t):** yellow solid; Mp 85.6 – 86.3 °C; 73% yield;  $^1\text{H}$  NMR (300 MHz,  $\text{CDCl}_3$ )  $\delta$  9.34 (d,  $J = 8.2$  Hz, 1H), 8.43 (s, 1H), 8.24 (d,  $J = 3.0$  Hz, 1H), 8.18 – 8.09 (m, 1H), 8.02 – 7.90 (m, 2H), 7.87 – 7.65 (m, 2H),

7.36 (s, 8H);  $^{13}\text{C}$  NMR (75 MHz,  $\text{CDCl}_3$ )  $\delta$  190.5, 151.5, 145.5, 140.8 (q,  $J = 33.6$  Hz), 136.8, 133.8, 131.7, 131.4, 130.7, 129.0, 128.9, 128.7, 128.2, 128.1, 127.9, 124.8, 124.5, 122.3 (q,  $J$

= 273.9 Hz), 122.3 (q,  $J = 4.7$  Hz), 121.2, 119.6;  $^{19}\text{F}$  NMR (376 MHz,  $\text{CDCl}_3$ )  $\delta$  -66.9; HRMS (ESI)  $m/z$  378.1100 ( $\text{M}+\text{H}^+$ ), calc. for  $\text{C}_{20}\text{H}_{13}\text{F}_3\text{O}$  378.1108.

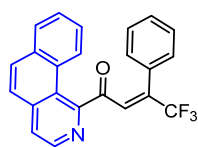

**(E)-1-(benzo[h]isoquinolin-1-yl)-4,4,4-trifluoro-3-phenylbut-2-en-1-one**

**(1u):** yellow solid; Mp 77.9 – 78.3 °C; 88% yield;  $^1\text{H}$  NMR (300 MHz,  $\text{CDCl}_3$ )  $\delta$  9.34 (d,  $J = 8.3$  Hz, 1H), 8.43 (s, 1H), 8.29 – 8.20 (m, 1H), 8.17 – 8.09 (m, 1H), 8.01 – 7.90 (m, 1H), 7.88 – 7.83 (m, 2H), 7.82 – 7.75 (m, 2H),

7.76 – 7.67 (m, 1H), 7.36 (s, 5H);  $^{13}\text{C}$  NMR (75 MHz,  $\text{CDCl}_3$ )  $\delta$  190.5, 151.4, 145.4, 142.3 (q,  $J = 30.4$  Hz), 136.8, 133.8, 131.6, 131.4, 130.7, 129.1, 128.9, 128.8, 128.6, 128.3 (q,  $J = 2.9$  Hz), 128.2, 128.1, 127.9, 124.8, 124.5, 122.7 (q,  $J = 274.0$  Hz) 119.5;  $^{19}\text{F}$  NMR (376 MHz,  $\text{CDCl}_3$ )  $\delta$  -66.9; HRMS (ESI)  $m/z$  378.1100 ( $\text{M}+\text{H}^+$ ), calc. for  $\text{C}_{20}\text{H}_{13}\text{F}_3\text{O}$  378.1103.

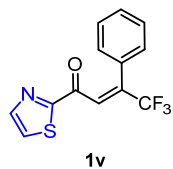

**(E)-4,4,4-trifluoro-3-phenyl-1-(thiazol-2-yl)but-2-en-1-one (1v):** yellow

solid; Mp 83.5 – 83.9 °C; 93% yield;  $^1\text{H}$  NMR (600 MHz,  $\text{CDCl}_3$ )  $\delta$  8.05 (d,  $J = 3.0$  Hz, 1H), 7.93 (d,  $J = 1.4$  Hz, 1H), 7.70 (d,  $J = 3.0$  Hz, 1H), 7.44 – 7.38

(m, 3H), 7.35 – 7.30 (m, 2H);  $^{13}\text{C}$  NMR (151 MHz,  $\text{CDCl}_3$ )  $\delta$  181.4, 167.18, 145.1, 143.3 (q,  $J = 31.1$  Hz), 131.0, 129.4, 128.7, 128.3, 127.4, 126.2 (q,  $J = 5.2$  Hz), 122.5 (q,  $J = 275.1$  Hz);  $^{19}\text{F}$  NMR (565 MHz,  $\text{CDCl}_3$ )  $\delta$  -67.3; HRMS (ESI)  $m/z$  284.0352 ( $\text{M}+\text{H}^+$ ), calc. for  $\text{C}_{20}\text{H}_{13}\text{F}_3\text{O}$  284.0355.

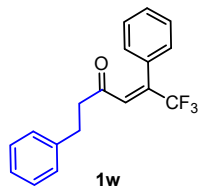

**(E)-6,6,6-trifluoro-1,5-diphenylhex-4-en-3-one (1w):** yellow oil; 87% yield;

$^1\text{H}$  NMR (300 MHz,  $\text{CDCl}_3$ )  $\delta$  7.51 – 7.40 (m, 4H), 7.37 – 7.25 (m, 4H), 7.10 – 6.97 (m, 2H), 6.85 – 6.67 (m, 1H), 2.81 (t,  $J = 7.4$  Hz, 2H), 2.58 (t,  $J = 7.5$  Hz, 2H);  $^{13}\text{C}$  NMR (75 MHz,  $\text{CDCl}_3$ )  $\delta$  200.6, 140.2, 138.4 (q,  $J = 30.9$

Hz), 131.9 (p,  $J = 5.0$  Hz), 130.8, 129.6, 128.9, 128.6, 128.3, 128.1, 126.1, 122.7 (d,  $J = 274.8$  Hz), 44.5, 29.3;  $^{19}\text{F}$  NMR (376 MHz,  $\text{CDCl}_3$ )  $\delta$  -66.8; HRMS (ESI)  $m/z$  305.1148 ( $\text{M}+\text{H}^+$ ), calc. for  $\text{C}_{20}\text{H}_{13}\text{F}_3\text{O}$  305.1150.

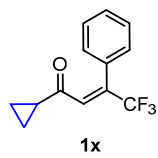

**(E)-1-cyclopropyl-4,4,4-trifluoro-3-phenylbut-2-en-1-one (1x):** yellow oil;

74% yield;  $^1\text{H}$  NMR (300 MHz,  $\text{CDCl}_3$ )  $\delta$  7.38 – 7.25 (m, 5H), 6.71 (s, 1H), 1.64 – 1.48 (m, 1H), 0.95 – 0.82 (m, 2H), 0.64 – 0.53 (m, 2H);  $^{13}\text{C}$  NMR (75

MHz,  $\text{CDCl}_3$ )  $\delta$  201.8, 138.3 (q,  $J = 30.8$  Hz), 132.6 (q,  $J = 5.0$  Hz), 131.1, 129.6, 129.2, 128.4, 122.9 (q,  $J = 274.8$  Hz), 22.1, 12.8;  $^{19}\text{F}$  NMR (376 MHz,  $\text{CDCl}_3$ )  $\delta$  -65.6; HRMS (ESI)  $m/z$  241.0835 ( $\text{M}+\text{H}^+$ ), calc. for  $\text{C}_{20}\text{H}_{13}\text{F}_3\text{O}$  241.0840.

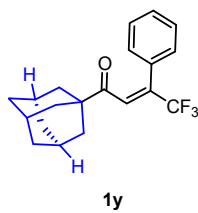

**(E)-1-(adamantan-1-yl)-4,4,4-trifluoro-3-phenylbut-2-en-1-one (1y):**

yellow oil; 76% yield;  $^1\text{H}$  NMR (300 MHz,  $\text{CDCl}_3$ )  $\delta$  7.43 – 7.39 (m, 2H), 7.35 – 7.25 (m, 2H), 7.15 – 7.09 (m, 1H), 2.07 (s, 2H), 1.86 – 1.64 (m, 9H);

$^{13}\text{C}$  NMR (75 MHz,  $\text{CDCl}_3$ )  $\delta$  205.3, 138.5 (q,  $J = 30.5$  Hz), 131.1, 129.1

(q,  $J = 4.7$  Hz), 129.0, 128.0, 122.7 (q,  $J = 274.8$  Hz), 46.5, 37.6, 36.2;  $^{19}\text{F}$  NMR (376 MHz,  $\text{CDCl}_3$ )  $\delta$  -66.6; HRMS (ESI)  $m/z$  335.1617 ( $\text{M}+\text{H}^+$ ), calc. for  $\text{C}_{20}\text{H}_{13}\text{F}_3\text{O}$  335.1620.

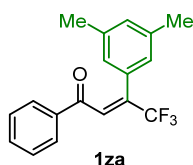

**(E)-3-(3,5-dimethylphenyl)-4,4,4-trifluoro-1-phenylbut-2-en-1-one**

**(1za):** yellow oil; 83% yield;  $^1\text{H}$  NMR (300 MHz,  $\text{CDCl}_3$ )  $\delta$  7.80 – 7.73 (m, 2H), 7.44 – 7.35 (m, 1H), 7.28 (t,  $J = 7.4$  Hz, 2H), 7.17 (s, 1H), 6.82 (d,  $J =$

13.0 Hz, 3H), 2.11 (s, 6H);  $^{13}\text{C}$  NMR (75 MHz,  $\text{CDCl}_3$ )  $\delta$  192.0, 138.9 (q,

$J = 30.7$  Hz), 137.7, 136.0, 133.5, 130.9, 130.4 (q,  $J = 5.1$  Hz), 128.6, 128.4, 126.6, 122.9 (q,  $J = 274.8$  Hz), 21.1;  $^{19}\text{F}$  NMR (376 MHz,  $\text{CDCl}_3$ )  $\delta$  -66.0; HRMS (ESI)  $m/z$  305.1148 ( $\text{M}+\text{H}^+$ ), calc. for  $\text{C}_{18}\text{H}_{15}\text{F}_3\text{O}$  305.1148.

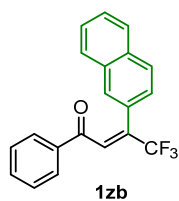

**(E)-4,4,4-trifluoro-3-(naphthalen-2-yl)-1-phenylbut-2-en-1-one (1zb)<sup>15</sup>:**

yellow solid; Mp 73.6 – 74.3 °C; 93% yield;  $^1\text{H}$  NMR (300 MHz,  $\text{CDCl}_3$ )  $\delta$  7.85 (d,  $J = 7.2$  Hz, 2H), 7.81 – 7.70 (m, 4H), 7.48 (q,  $J = 5.6$  Hz, 3H), 7.37

(t,  $J = 7.6$  Hz, 4H);  $^{13}\text{C}$  NMR (75 MHz,  $\text{CDCl}_3$ )  $\delta$  192.1, 139.0 (q,  $J = 30.9$

Hz), 136.1, 134.0, 133.3, 132.7, 131.1 (q,  $J = 5.0$  Hz), 129.2, 128.9, 128.7, 128.4, 128.3, 128.2, 127.7, 127.1, 126.6, 126.1, 123.0 (q,  $J = 275.1$  Hz);  $^{19}\text{F}$  NMR (376 MHz,  $\text{CDCl}_3$ )  $\delta$  -65.6; HRMS (ESI)  $m/z$  327.0991 ( $\text{M}+\text{H}^+$ ), calc. for  $\text{C}_{20}\text{H}_{13}\text{F}_3\text{O}$  327.0989.

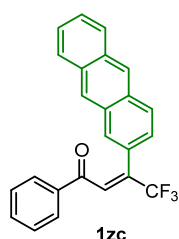

**(E)-3-(anthracen-2-yl)-4,4,4-trifluoro-1-phenylbut-2-en-1-one (1zc):**

yellow solid; Mp 77.3 – 78.2 °C; 93% yield;  $^1\text{H}$  NMR (300 MHz,  $\text{CDCl}_3$ )  $\delta$  8.34 (s, 2H), 7.96 (d,  $J = 12.4$  Hz, 3H), 7.91 – 7.80 (m, 3H), 7.45 (t,  $J = 6.7$

Hz, 3H), 7.40 – 7.27 (m, 4H);  $^{13}\text{C}$  NMR (75 MHz,  $\text{CDCl}_3$ )  $\delta$  192.2, 139.1 (q,

$J = 31.0$  Hz), 136.0, 133.9, 132.3, 131.9, 131.1 (q,  $J = 5.0$  Hz), 130.9, 130.5,

129.8, 128.8, 128.7, 128.5, 128.2, 128.1, 127.8, 127.2, 126.1, 126.0, 125.7, 125.2, 123.1 (q,  $J = 275.1$  Hz);  $^{19}\text{F}$  NMR (376 MHz,  $\text{CDCl}_3$ )  $\delta$  -66.0; HRMS (ESI)  $m/z$  377.1148 ( $\text{M}+\text{H}^+$ ), calc. for  $\text{C}_{24}\text{H}_{15}\text{F}_3\text{O}$  377.1150.

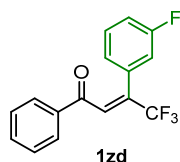

**(E)-4,4,4-trifluoro-3-(3-fluorophenyl)-1-phenylbut-2-en-1-one (1zd):**

yellow oil; 88% yield;  $^1\text{H}$  NMR (300 MHz,  $\text{CDCl}_3$ )  $\delta$  7.85 (d,  $J = 7.5$  Hz, 2H), 7.59 – 7.49 (m, 1H), 7.45 – 7.33 (m, 3H), 7.26 – 7.16 (m, 1H), 7.08 (d,  $J = 7.7$  Hz, 2H), 7.05 – 6.92 (m, 1H);  $^{13}\text{C}$  NMR (75 MHz,  $\text{CDCl}_3$ )  $\delta$  191.3, 162.3 (d,  $J = 247.3$  Hz), 137.6 (q,  $J = 31.2$  Hz), 136.0, 134.2, 132.8 (d,  $J = 8.3$  Hz), 131.7 (d,  $J = 5.2$  Hz), 128.9, 128.8, 125.1 (d,  $J = 3.3$  Hz), 122.7 (q,  $J = 274.7$  Hz), 116.7, 116.37, 116.09;  $^{19}\text{F}$  NMR (376 MHz,  $\text{CDCl}_3$ )  $\delta$  -66.3, -112.2; HRMS (ESI)  $m/z$  295.0741 ( $\text{M}+\text{H}^+$ ), calc. for  $\text{C}_{16}\text{H}_{10}\text{F}_4\text{O}$  295.0743.

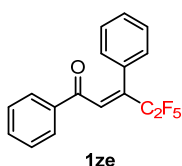

**(E)-4,4,5,5,5-pentafluoro-1,3-diphenylpent-2-en-1-one (1ze):**

yellow oil; 65% yield;  $^1\text{H}$  NMR (600 MHz,  $\text{CDCl}_3$ )  $\delta$  7.85 (d,  $J = 7.7$  Hz, 2H), 7.57 (t,  $J = 7.5$  Hz, 1H), 7.45 (t,  $J = 7.7$  Hz, 2H), 7.37 (s, 1H), 7.33 – 7.25 (m, 5H);  $^{13}\text{C}$  NMR (151 MHz,  $\text{CDCl}_3$ )  $\delta$  191.8, 138.1 (t,  $J = 21.5$  Hz), 136.1, 134.4 (t,  $J = 7.7$  Hz), 133.9, 130.9, 129.4, 129.3, 128.8, 128.7, 128.2, 118.9 (dt,  $J = 287.4, 38.1$  Hz), 112.4 (tq,  $J = 256.5, 38.0$  Hz);  $^{19}\text{F}$  NMR (565 MHz,  $\text{CDCl}_3$ )  $\delta$  -82.2, -114.5; HRMS (ESI)  $m/z$  327.0803 ( $\text{M}+\text{H}^+$ ), calc. for  $\text{C}_{17}\text{H}_{11}\text{F}_5\text{O}$  327.0804.

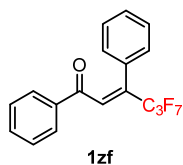

**(E)-4,4,5,5,6,6,6-heptafluoro-1,3-diphenylhex-2-en-1-one (1zf):**

yellow oil; 64% yield;  $^1\text{H}$  NMR (300 MHz,  $\text{CDCl}_3$ )  $\delta$  7.80 – 7.72 (m, 2H), 7.48 (t,  $J = 7.6$  Hz, 2H), 7.38 – 7.30 (m, 3H), 7.20 (s, 4H);  $^{13}\text{C}$  NMR (75 MHz,  $\text{CDCl}_3$ )  $\delta$  191.9, 138.1 (t,  $J = 22.0$  Hz), 136.1, 134.9 (t,  $J = 8.1$  Hz), 133.9, 131.1, 129.6, 129.3, 128.8, 128.7, 128.2, 128.1, 126.4, 112.4 (tq,  $J = 262.2, 30.3$  Hz);  $^{19}\text{F}$  NMR (376 MHz,  $\text{CDCl}_3$ )  $\delta$  -81.1, -116.5 – -117.3 (m, 2F), -121.8 – -125.2 (m, 2F); HRMS (ESI)  $m/z$  377.0771 ( $\text{M}+\text{H}^+$ ), calc. for  $\text{C}_{17}\text{H}_{11}\text{F}_7\text{O}$  377.0780.

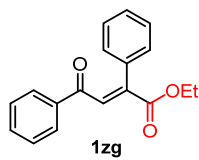

**Ethyl (E)-4-oxo-2,4-diphenylbut-2-enoate (1zg)<sup>12</sup>:**

yellow oil; 53% yield;  $^1\text{H}$  NMR (300 MHz,  $\text{CDCl}_3$ )  $\delta$  7.92 – 7.79 (m, 2H), 7.74 (d,  $J = 2.9$  Hz, 1H), 7.56 – 7.50 (m, 1H), 7.41 (t,  $J = 7.2$  Hz, 2H), 7.27 (d,  $J = 2.8$  Hz, 5H), 4.38 (q,  $J = 7.2$  Hz, 2H), 1.39 (t,  $J = 7.2$  Hz, 3H);  $^{13}\text{C}$  NMR (75 MHz,  $\text{CDCl}_3$ )  $\delta$  193.8, 166.4, 140.7, 136.1, 136.0, 133.7, 133.5, 129.4, 128.9, 128.5, 127.8, 61.9, 14.1; HRMS (ESI)  $m/z$  280.1172 ( $\text{M}+\text{H}^+$ ), calc. for  $\text{C}_{18}\text{H}_{16}\text{O}_3$  280.1175;

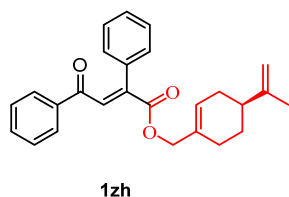

1zh

**(S)-4-(prop-1-en-2-yl)cyclohex-1-en-1-ylmethyl (E)-4-oxo-2,4-diphenylbut-2-enoate (1zh)**<sup>12</sup>: yellow oil; 57% yield; <sup>1</sup>H NMR (300

MHz, CDCl<sub>3</sub>) δ 7.91 – 7.83 (m, 2H), 7.73 (s, 1H), 7.53 (t, *J* = 7.5 Hz, 1H), 7.40 (t, *J* = 7.5 Hz, 2H), 7.26 (s, 5H), 5.83 (d, *J* = 4.8 Hz, 1H),

4.78 (s, 1H), 4.77 (s, 1H), 4.71 (s, 2H), 2.30 – 2.07 (m, 4H), 2.10 – 1.98 (m, 1H), 1.96 – 1.86 (m, 1H), 1.79 (s, 3H), 1.61 – 1.47 (m, 1H), 1.40 – 1.25 (m, 1H); <sup>13</sup>C NMR (75 MHz, CDCl<sub>3</sub>) δ 193.6, 166.2, 149.3, 140.5, 136.1, 136.0, 133.7, 133.5, 132.0, 129.3, 128.8, 128.4, 127.7, 126.1, 108.8, 69.6, 40.6, 30.3, 27.1, 26.3, 20.6; HRMS (ESI) *m/z* 387.1955 (M+H<sup>+</sup>), calc. for C<sub>18</sub>H<sub>16</sub>O<sub>3</sub> 387.1969;

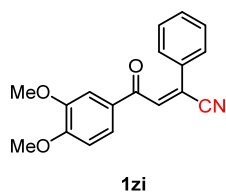

1zi

**(E)-4-(3,4-dimethoxyphenyl)-4-oxo-2-phenylbut-2-enitrile (1zi)**<sup>12</sup>:

yellow solid; Mp 83.3 – 84.7 °C; 93% yield; <sup>1</sup>H NMR (300 MHz, CDCl<sub>3</sub>) δ 7.90 (s, 1H), 7.82 – 7.75 (m, 2H), 7.68 – 7.59 (m, 2H), 7.55 – 7.45 (m,

3H), 6.92 (d, *J* = 8.2 Hz, 1H), 3.97 (s, 3H), 3.95 (s, 3H); <sup>13</sup>C NMR (75

MHz, CDCl<sub>3</sub>) δ 185.2, 154.4, 149.6, 133.3, 132.6, 131.3, 129.9, 129.3, 127.1, 124.1, 123.5, 116.1, 110.6, 110.0, 56.2, 56.0; HRMS (ESI) *m/z* 294.1125 (M+H<sup>+</sup>), calc. for C<sub>18</sub>H<sub>16</sub>O<sub>3</sub> 294.1130;

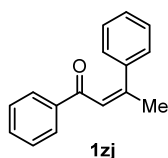

1zj

**(Z)-1,3-diphenylbut-2-en-1-one (1zj)**<sup>13</sup>: yellow oil; 63% yield; <sup>1</sup>H NMR

(300 MHz, CDCl<sub>3</sub>) δ 8.11 – 8.01 (m, 2H), 7.72 – 7.59 (m, 3H), 7.59 – 7.43 (m, 5H), 7.34 – 7.19 (m, 1H), 2.69 (s, 3H); <sup>13</sup>C NMR (75 MHz, CDCl<sub>3</sub>) δ

191.7, 155.0, 142.6, 139.2, 132.4, 129.0, 128.5, 128.4, 128.2, 126.4, 122.0, 18.8; HRMS (ESI) *m/z* 223.1118 (M+H<sup>+</sup>), calc. for C<sub>16</sub>H<sub>14</sub>O 223.1118.

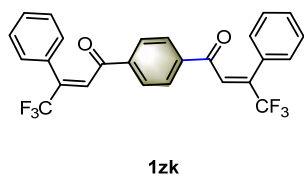

1zk

**(2E,2'E)-1,1'-(1,4-phenylene)bis(4,4,4-trifluoro-3-phenylbut-**

**2-en-1-one) (1zk)**: yellow solid; Mp 75.3 – 77.0 °C; 78% yield;

<sup>1</sup>H NMR (300 MHz, CDCl<sub>3</sub>) δ 7.82 (s, 4H), 7.39 – 7.19 (m, 12H);

<sup>13</sup>C NMR (75 MHz, CDCl<sub>3</sub>) δ 191.4, 139.9 (q, *J* = 31.1 Hz), 139.4,

130.5, 130.0 (q, *J* = 5.2 Hz), 129.6, 128.9, 128.9, 128.4, 122.7 (q, *J* = 274.8 Hz); <sup>19</sup>F NMR (376 MHz, CDCl<sub>3</sub>) δ -66.3; HRMS (ESI) *m/z* 474.1054 (M+H<sup>+</sup>), calc. for C<sub>16</sub>H<sub>14</sub>O 474.1060.

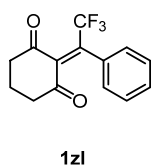

**2-(2,2,2-trifluoro-1-phenylethylidene)cyclohexane-1,3-dione (1zl)<sup>14</sup>:**

yellow solid; Mp 130.2 – 131.8 °C; 47% yield; <sup>1</sup>H NMR (300 MHz, CDCl<sub>3</sub>) δ 7.44 (s, 3H), 7.25 (s, 2H), 2.89 (t, *J* = 6.7 Hz, 2H), 2.68 (t, *J* = 6.7 Hz, 2H), 2.21 – 1.98 (m, 2H); <sup>13</sup>C NMR (75 MHz, CDCl<sub>3</sub>) δ 198.0, 196.8, 147.9, 136.4 (q, *J* = 32.9 Hz), 130.7, 129.3, 128.3, 128.2, 121.6 (q, *J* = 277.6 Hz), 42.0, 41.20, 17.7; <sup>19</sup>F NMR (376 MHz, CDCl<sub>3</sub>) δ -57.8; HRMS (ESI) *m/z* 269.0784 (M+H<sup>+</sup>), calc. for C<sub>14</sub>H<sub>12</sub>F<sub>3</sub>O<sub>2</sub> 269.0788.

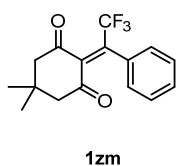

**5,5-dimethyl-2-(2,2,2-trifluoro-1-phenylethylidene)cyclohexane-1,3-dione (1zm)<sup>14</sup>:**

yellow solid; Mp 93.0 – 91.5 °C; 70% yield; <sup>1</sup>H NMR (300 MHz, CDCl<sub>3</sub>) δ 7.44 – 7.34 (m, 3H), 7.20 (d, *J* = 6.5 Hz, 2H), 2.82 (s, 2H), 2.61 (s, 2H), 1.10 (s, 6H); <sup>13</sup>C NMR (75 MHz, CDCl<sub>3</sub>) δ 197.1, 196.1, 147.1, 136.6 (q, *J* = 33.0 Hz), 129.4, 128.4, 128.3, 123.5 (q, *J* = 268.1 Hz), 118.8, 56.6, 55.8, 30.8, 28.4; <sup>19</sup>F NMR (376 MHz, CDCl<sub>3</sub>) δ -56.5; HRMS (ESI) *m/z* 297.1097 (M+H<sup>+</sup>), calc. for C<sub>16</sub>H<sub>16</sub>F<sub>3</sub>O<sub>2</sub> 297.1100.

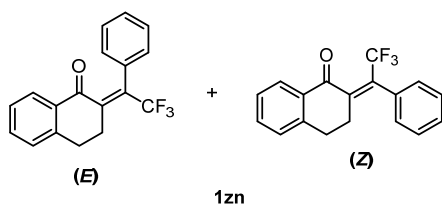

**(E)-2-(2,2,2-trifluoro-1-phenylethylidene)-3,4-dihydronaphthalen-1(2H)-one and (Z)-2-(2,2,2-trifluoro-1-phenylethylidene)-3,4-dihydronaphthalen-1(2H)-one (1zn):**

yellow solid; 63% yield, 5:1 Z/E; Mixed substrate; <sup>1</sup>H NMR (400 MHz, CDCl<sub>3</sub>) δ 7.75 (d, *J* = 8.5 Hz, 1H), 7.41 – 7.32 (m, 2H), 7.23 – 7.21 (m, 2H), 7.19 – 7.15 (m, 2H), 7.07 – 6.98 (m, 2H), 3.14 – 3.09 (m, 2H), 3.08 – 3.02 (m, 2H); <sup>13</sup>C NMR (101 MHz, CDCl<sub>3</sub>) δ 189.0, 145.0 (q, *J* = 2.5 Hz), 143.1, 134.0 (q, *J* = 35.0 Hz), 133.8, 133.6, 129.0, 128.5, 128.3, 128.0, 128.0, 127.1, 123.3 (q, *J* = 277.0 Hz), 30.6, 30.2; <sup>19</sup>F NMR (376 MHz, CDCl<sub>3</sub>) δ -56.7; HRMS (ESI) *m/z* 303.0991 (M+H<sup>+</sup>), calc. for C<sub>16</sub>H<sub>16</sub>F<sub>3</sub>O<sub>2</sub> 303.0988.

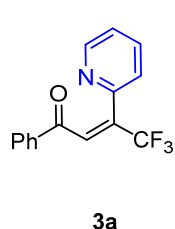

**(E)-4,4,4-trifluoro-1-phenyl-3-(pyridin-2-yl)but-2-en-1-one (3a):**

yellow solid; Mp 77.3 – 78.1 °C; 83% yield; <sup>1</sup>H NMR (300 MHz, CDCl<sub>3</sub>) δ 8.32 (d, *J* = 4.0 Hz, 1H), 7.89 (d, *J* = 7.0 Hz, 2H), 7.64 (t, *J* = 6.9 Hz, 1H), 7.56 – 7.46 (m, 2H), 7.46 – 7.35 (m, 2H), 7.24 (d, *J* = 1.4 Hz, 1H), 7.16 – 7.09 (m, 1H); <sup>13</sup>C NMR (75 MHz, CDCl<sub>3</sub>) δ 192.4, 148.9, 148.7, 136.4, 136.1, 135.6 (q, *J* = 30.3 Hz), 133.6 (q, *J* = 5.2 Hz), 133.2, 128.5, 128.3, 123.6, 122.8 (q, *J* = 274.3 Hz), 122.8 (q, *J* = 2.2 Hz); <sup>19</sup>F NMR (376 MHz, CDCl<sub>3</sub>) δ -67.1; HRMS (ESI) *m/z* 278.0787 (M+H<sup>+</sup>), calc. for

C<sub>16</sub>H<sub>16</sub>F<sub>3</sub>O<sub>2</sub> 278.0789.

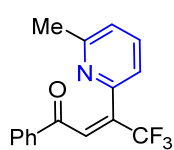

**3b**

**(E)-4,4,4-trifluoro-3-(6-methylpyridin-2-yl)-1-phenylbut-2-en-1-one**

**(3b):** yellow solid; Mp 73.3 – 73.7 °C; 86% yield; <sup>1</sup>H NMR (300 MHz,

CDCl<sub>3</sub>) δ 7.87 (d, *J* = 7.2 Hz, 2H), 7.49 (q, *J* = 7.4 Hz, 2H), 7.43 – 7.33 (m,

2H), 7.29 (d, *J* = 7.8 Hz, 1H), 7.12 – 7.06 (m, 1H), 6.92 (d, *J* = 7.7 Hz, 1H),

2.07 (s, 3H); <sup>13</sup>C NMR (75 MHz, CDCl<sub>3</sub>) δ 193.0, 157.9, 147.4, 136.9, 136.5, 134.8 (q, *J* = 30.1

Hz), 133.8 (q, *J* = 5.5 Hz), 132.9, 128.4, 128.3, 123.4, 123.0 (q, *J* = 274.0 Hz), 119.3, 22.9; <sup>19</sup>F

NMR (376 MHz, CDCl<sub>3</sub>) δ -63.3; HRMS (ESI) *m/z* 292.0944 (M+H<sup>+</sup>), calc. for C<sub>16</sub>H<sub>16</sub>F<sub>3</sub>O<sub>2</sub>

292.0947.

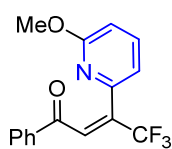

**3c**

**(E)-4,4,4-trifluoro-3-(6-methoxypyridin-2-yl)-1-phenylbut-2-en-1-one**

**(3c):** yellow solid; Mp 75.6 – 77.9 °C; 80% yield; <sup>1</sup>H NMR (300 MHz,

CDCl<sub>3</sub>) δ 7.91 (d, *J* = 8.6 Hz, 2H), 7.59 – 7.48 (m, 2H), 7.47 – 7.36 (m,

2H), 7.15 (d, *J* = 7.6 Hz, 1H), 7.08 – 7.01 (m, 1H), 6.60 (d, *J* = 8.3 Hz,

1H), 3.28 (s, 3H); <sup>13</sup>C NMR (75 MHz, CDCl<sub>3</sub>) δ 193.3, 163.2, 145.7, 139.0, 135.8, 134.5 (q, *J* =

30.0 Hz), 133.6, 133.5, 128.9, 128.6, 123.0 (q, *J* = 274.3 Hz), 115.6 (q, *J* = 2.8 Hz), 112.4,

53.4; <sup>19</sup>F NMR (376 MHz, CDCl<sub>3</sub>) δ -63.9; HRMS (ESI) *m/z* 309.0893 (M+H<sup>+</sup>), calc. for

C<sub>16</sub>H<sub>16</sub>F<sub>3</sub>O<sub>2</sub> 309.0899.

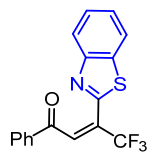

**3d**

**(Z)-3-(benzo[d]thiazol-2-yl)-4,4,4-trifluoro-1-phenylbut-2-en-1-one (3d):**

yellow solid; Mp 66.3 – 66.9 °C; 83% yield; <sup>1</sup>H NMR (300 MHz, CDCl<sub>3</sub>) δ 7.93

– 7.87 (m, 2H), 7.84 – 7.78 (m, 1H), 7.75 – 7.69 (m, 1H), 7.46 (dd, *J* = 10.0, 4.7

Hz, 1H), 7.41 – 7.27 (m, 5H); <sup>13</sup>C NMR (75 MHz, CDCl<sub>3</sub>) δ 191.7, 155.7, 152.3,

135.8 (q, *J* = 4.8 Hz), 135.5, 135.4, 133.8, 130.1 (q, *J* = 32.2 Hz), 128.6, 128.5, 126.4, 126.2,

123.8, 121.2, 118.3 (q, *J* = 274.8 Hz); <sup>19</sup>F NMR (376 MHz, CDCl<sub>3</sub>) δ -65.6; HRMS (ESI) *m/z*

334.0508 (M+H<sup>+</sup>), calc. for C<sub>16</sub>H<sub>16</sub>F<sub>3</sub>O<sub>2</sub> 334.0500.

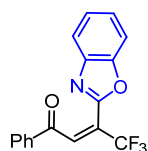

**3e**

**(E)-3-(benzo[d]oxazol-2-yl)-4,4,4-trifluoro-1-phenylbut-2-en-1-one (3e):**

yellow solid; Mp 73.3 – 75.0 °C; 83% yield; <sup>1</sup>H NMR (300 MHz, CDCl<sub>3</sub>) δ 7.99

– 7.93 (m, 2H), 7.70 (td, *J* = 5.2, 2.2 Hz, 1H), 7.64 – 7.56 (m, 1H), 7.51 – 7.43

(m, 4H), 7.36 – 7.29 (m, 2H); <sup>13</sup>C NMR (75 MHz, CDCl<sub>3</sub>) δ 191.4, 154.6, 150.2,

140.8, 138.11 (q, *J* = 4.7 Hz), 134.4, 129.0, 128.8, 126.7, 125.2, 121.40 (q, *J* = 274.5 Hz),

124.14 (d, *J* = 33.0 Hz), 121.1, 110.8; <sup>19</sup>F NMR (376 MHz, CDCl<sub>3</sub>) δ -66.1; HRMS (ESI) *m/z*

318.0737 (M+H<sup>+</sup>), calc. for C<sub>16</sub>H<sub>16</sub>F<sub>3</sub>O<sub>2</sub> 318.0736.



## 10. Characterization of adducts

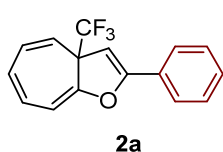

**2-phenyl-3a-(trifluoromethyl)-3aH-cyclohepta[b]furan (2a):** white solid; Mp 42.1 – 42.4 °C; 26.2 mg, 95% yield; <sup>1</sup>H NMR (400 MHz, CDCl<sub>3</sub>) δ 7.70 (d, *J* = 3.2 Hz, 2H), 7.42 (t, *J* = 3.4 Hz, 3H), 6.58 – 6.38 (m, 4H), 5.82 (s, 1H), 5.30 (d, *J* = 9.9 Hz, 1H); <sup>13</sup>C NMR (101 MHz, CDCl<sub>3</sub>) δ 157.3, 146.0, 129.9, 128.9, 128.6, 128.2, 126.3 (q, *J* = 286.5 Hz), 125.9, 125.6, 125.4, 112.5, 104.9, 99.2, 58.6 (q, *J* = 31.1 Hz); <sup>19</sup>F NMR (376 MHz, CDCl<sub>3</sub>) δ -76.0; HRMS (ESI) *m/z* 277.0835 (M+H<sup>+</sup>), calc. for C<sub>16</sub>H<sub>11</sub>F<sub>3</sub>O 277.0837.

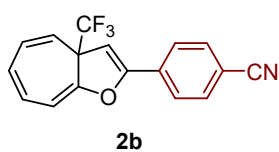

**4-(3a-(trifluoromethyl)-3aH-cyclohepta[b]furan-2-yl)benzonitrile (2b):** white solid; Mp 107.6 – 108.3 °C; 22.9 mg, 76% yield; <sup>1</sup>H NMR (600 MHz, CDCl<sub>3</sub>) δ 7.77 (d, *J* = 8.5 Hz, 2H), 7.70 (d, *J* = 8.5 Hz, 2H), 6.55 – 6.43 (m, 4H), 5.97 – 5.94 (m, 1H), 5.29 (d, *J* = 10.2 Hz, 1H); <sup>13</sup>C NMR (151 MHz, CDCl<sub>3</sub>) δ 155.5, 145.5, 132.6, 132.4, 129.4, 126.3, 126.2 (q, *J* = 286.9 Hz), 126.0, 126.0, 118.5, 113.5, 112.2, 105.7, 102.6, 58.9 (q, *J* = 31.3 Hz); <sup>19</sup>F NMR (565 MHz, CDCl<sub>3</sub>) δ -75.9; HRMS (ESI) *m/z* 302.0787 (M+H<sup>+</sup>), calc. for C<sub>17</sub>H<sub>10</sub>F<sub>3</sub>NO 302.0789.

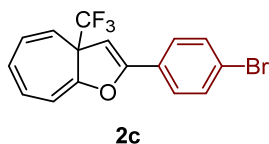

**2-(4-bromophenyl)-3a-(trifluoromethyl)-3aH-cyclohepta[b]furan (2c):** white solid; Mp 104.4 – 105.9 °C; 33.7 mg, 95% yield; <sup>1</sup>H NMR (300 MHz, CDCl<sub>3</sub>) δ 7.55 (s, 4H), 6.48 (ddd, *J* = 8.5, 6.2, 3.0 Hz, 4H), 5.81 (s, 1H), 5.28 (d, *J* = 10.2 Hz, 1H); <sup>13</sup>C NMR (75 MHz, CDCl<sub>3</sub>) δ 156.4, 145.8, 131.9, 129.0, 127.2, 126.2 (d, *J* = 286.8 Hz), 125.9, 125.6, 124.2, 112.4, 105.1, 99.9, 58.7 (q, *J* = 31.2 Hz); <sup>19</sup>F NMR (565 MHz, CDCl<sub>3</sub>) δ -76.1; HRMS (ESI) *m/z* 354.9940 (M+H<sup>+</sup>), calc. for C<sub>16</sub>H<sub>10</sub>BrF<sub>3</sub>O 354.9946.

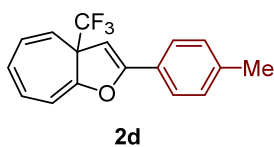

**2-(p-tolyl)-3a-(trifluoromethyl)-3aH-cyclohepta[b]furan (2d):** white solid; Mp 110.8 – 111.7 °C; 28.4 mg, 98% yield; <sup>1</sup>H NMR (300 MHz, CDCl<sub>3</sub>) δ 7.58 (d, *J* = 8.2 Hz, 2H), 7.23 (d, *J* = 8.1 Hz, 2H), 6.60 – 6.33 (m, 4H), 5.75 (s, 1H), 5.29 (d, *J* = 10.2 Hz, 1H), 2.40 (s, 3H); <sup>13</sup>C NMR (75 MHz, CDCl<sub>3</sub>) δ 157.4, 146.1, 140.1, 129.3, 128.8, 126.3 (q, *J* = 286.7 Hz), 125.9, 125.7, 112.7, 104.7, 98.3, 77.4, 77.0, 76.6, 58.6 (q, *J* = 31.2 Hz), 24.4; <sup>19</sup>F NMR (565 MHz, CDCl<sub>3</sub>) δ -76.2; HRMS (ESI) *m/z* 291.0991 (M+H<sup>+</sup>), calc. for C<sub>18</sub>H<sub>22</sub>NO<sub>2</sub> 291.0996.

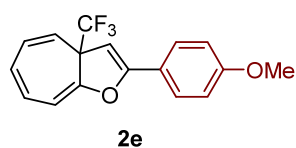

**2-(4-methoxyphenyl)-3a-(trifluoromethyl)-3aH-**

**cyclohepta[b]furan(2e):** yellow oil; 29.4mg, 96% yield;  $^1\text{H}$  NMR (300 MHz,  $\text{CDCl}_3$ )  $\delta$  7.62 (d,  $J = 8.8$  Hz, 2H), 6.93 (d,  $J = 8.8$  Hz, 2H), 6.55 – 6.36 (m, 4H), 5.66 (s, 1H), 5.28 (d,  $J = 10.1$  Hz, 1H), 3.85 (s, 3H);  $^{13}\text{C}$  NMR (75 MHz,  $\text{CDCl}_3$ )  $\delta$  160.9, 157.1, 146.2, 128.8, 127.2, 126.4 (q,  $J = 286.6$  Hz), 125.9, 125.4, 120.9, 114.0, 112.9, 104.7, 97.3 (d,  $J = 2.1$  Hz), 55.4;  $^{19}\text{F}$  NMR (376 MHz,  $\text{CD}_2\text{Cl}_2$ )  $\delta$  -76.4; HRMS (ESI)  $m/z$  307.0941 ( $\text{M}+\text{H}^+$ ), calc. for  $\text{C}_{17}\text{H}_{13}\text{F}_3\text{O}_2$  307.0940.

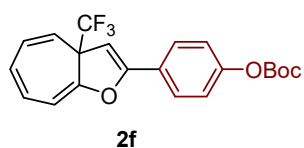

**tert-butyl (4-(3a-(trifluoromethyl)-3aH-cyclohepta[b]furan-2-**

**yl)phenyl) carbonate (2f):** white solid; Mp 70.0 – 71.2 °C; 36.5 mg, 93% yield;  $^1\text{H}$  NMR (600 MHz,  $\text{CDCl}_3$ )  $\delta$  7.63 – 7.51 (m, 2H), 7.18 – 7.07 (m, 2H), 6.41 (d,  $J = 7.1$  Hz, 1H), 6.38 – 6.34 (m, 2H), 6.31 (dd,  $J = 10.7$ , 6.9 Hz, 1H), 5.66 (s, 1H), 5.17 (d,  $J = 10.3$  Hz, 1H), 1.47 (s, 9H);  $^{13}\text{C}$  NMR (151 MHz,  $\text{CDCl}_3$ )  $\delta$  156.5, 156.5, 152.2, 152.2, 151.4, 151.4, 147.0, 146.0, 128.9, 126.9, 126.3 (q,  $J = 286.9$  Hz), 125.9, 125.5, 121.5, 112.6, 105.0, 99.3, 83.9, 58.7 (q,  $J = 31.3$  Hz), 27.7;  $^{19}\text{F}$  NMR (565 MHz,  $\text{CDCl}_3$ )  $\delta$  -76.1; HRMS (ESI)  $m/z$  393.1308 ( $\text{M}+\text{H}^+$ ), calc. for  $\text{C}_{21}\text{H}_{19}\text{F}_3\text{O}_4$  393.1312.

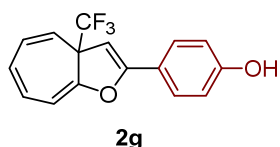

**4-(3a-(trifluoromethyl)-3aH-cyclohepta[b]furan-2-yl) phenol**

**(2g):** yellow oil; 25.4 mg, 87% yield;  $^1\text{H}$  NMR (400 MHz,  $\text{CDCl}_3$ )  $\delta$  7.60 – 7.54 (m, 2H), 6.89 – 6.85 (m, 2H), 6.51 – 6.40 (m, 4H), 5.65 (s, 1H), 5.28 (d,  $J = 10.3$  Hz, 1H);  $^{13}\text{C}$  NMR (101 MHz,  $\text{CDCl}_3$ )  $\delta$  157.0, 146.1, 128.8, 127.4, 126.4 (q,  $J = 286.6$  Hz), 125.8, 125.3, 121.1, 115.5, 112.9, 104.6, 97.3, 58.6 (q,  $J = 31.1$  Hz);  $^{19}\text{F}$  NMR (376 MHz,  $\text{CDCl}_3$ )  $\delta$  -76.1; HRMS (ESI)  $m/z$  293.0784 ( $\text{M}+\text{H}^+$ ), calc. for  $\text{C}_{16}\text{H}_{11}\text{F}_3\text{O}_2$  293.0782.

**2-(3,4-dimethoxyphenyl)-3a-(trifluoromethyl)-3aH-cyclohepta[b]furan (2h):** white solid;

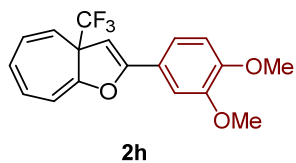

Mp 94.7 – 95.5 °C; 33.3 mg, 99% yield;  $^1\text{H}$  NMR (600 MHz,  $\text{CDCl}_3$ )

$\delta$  7.28 (dd,  $J = 8.4$ , 1.9 Hz, 1H), 7.15 (d,  $J = 1.9$  Hz, 1H), 6.88 (d,  $J = 8.4$  Hz, 1H), 6.51 (d,  $J = 7.1$  Hz, 1H), 6.49 – 6.44 (m, 2H), 6.41 (dd,  $J = 10.8$ , 6.7 Hz, 1H), 5.67 (s, 1H), 5.28 (d,  $J = 10.4$  Hz, 1H), 3.94 (s, 3H), 3.91 (s, 3H);  $^{13}\text{C}$  NMR (151 MHz,  $\text{CDCl}_3$ )  $\delta$  157.1, 150.6, 149.0, 146.1, 128.8, 126.4 (q,  $J = 286.9$  Hz), 125.9, 125.4, 121.1, 118.9, 112.9, 111.0, 108.5, 104.7, 97.6, 56.0, 58.7 (q,  $J = 31.0$  Hz);  $^{19}\text{F}$  NMR (565 MHz,  $\text{CDCl}_3$ )  $\delta$  -76.1; HRMS (ESI)  $m/z$  337.1046 ( $\text{M}+\text{H}^+$ ), calc. for  $\text{C}_{18}\text{H}_{15}\text{F}_3\text{O}_3$  337.1045.

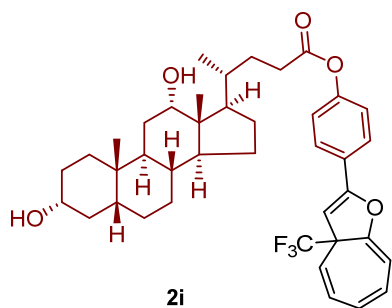

**4-(3a-(trifluoromethyl)-3aH-cyclohepta[b]furan-2-yl)phenyl (4R)-4-((3R,5R,8R,9S,10S,12S,13R,14S,17R)-3,12-dihydroxy-10,13-dimethylhexadecahydro-1H-cyclopenta[a]phenanthren-17-yl)pentanoate (2i):** white solid; Mp 90.4 – 92.4 °C; 55.3 mg, 83% yield; <sup>1</sup>H NMR (600 MHz, CDCl<sub>3</sub>) δ 7.71 – 7.63 (m, 2H), 7.15 – 7.10 (m, 2H),

6.51 – 6.36 (m, 4H), 5.75 (s, 1H), 5.26 (d, *J* = 10.3 Hz, 1H), 3.61 – 3.51 (m, 2H), 2.64 – 2.57 (m, 1H), 2.51 – 2.44 (m, 1H), 2.05 – 1.88 (m, 4H), 1.87 – 1.73 (m, 4H), 1.71 – 1.51 (m, 5H), 1.54 – 1.33 (m, 9H), 1.32 – 1.18 (m, 5H), 1.17 – 1.06 (m, 2H), 0.99 (d, *J* = 6.4 Hz, 4H), 0.93 (s, 3H), 0.69 (s, 3H); <sup>13</sup>C NMR (151 MHz, CDCl<sub>3</sub>) δ 172.3, 156.4, 151.8, 145.8, 128.8, 126.8, 126.2 (q, *J* = 286.7 Hz), 125.8, 125.7, 125.4, 121.8, 112.5, 104.8, 99.2, 99.1, 71.2, 71.2, 67.8, 58.5 (q, *J* = 31.1 Hz), 55.7, 54.9, 43.7, 43.6, 42.4, 40.1, 39.2, 37.2, 37.0, 35.2, 34.8, 34.0, 33.8, 31.3, 30.8, 30.2, 28.6, 26.8, 25.5, 25.5, 24.9, 23.3, 21.1, 18.4, 14.0, 12.1; <sup>19</sup>F NMR (565 MHz, CDCl<sub>3</sub>) δ -76.1; HRMS (ESI) *m/z* 667.3605 (M+H<sup>+</sup>), calc. for C<sub>40</sub>H<sub>49</sub>F<sub>3</sub>O<sub>5</sub> 667.3602.

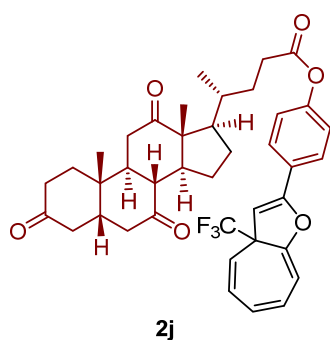

**4-(3a-(trifluoromethyl)-3aH-cyclohepta[b]furan-2-yl)phenyl (4R)-4-((5S,8R,9S,10S,13R,14S,17R)-10,13-dimethyl-3,7,12-trioxohexadecahydro-1H-cyclopenta[a]phenanthren-17-yl)pentanoate (2j):** white solid; Mp 136.4 – 137.4 °C; 64.2 mg, 95% yield; <sup>1</sup>H NMR (400 MHz, CDCl<sub>3</sub>) δ 7.68 (d, *J* = 8.7 Hz, 2H), 7.18 – 7.07 (m, 2H), 6.57 – 6.34 (m, 4H), 5.76 (d, *J* = 0.9

Hz, 1H), 5.27 (d, *J* = 10.3 Hz, 1H), 2.98 – 2.76 (m, 3H), 2.72 – 2.59 (m, 1H), 2.58 – 2.47 (m, 1H), 2.39 – 2.26 (m, 4H), 2.25 – 2.17 (m, 2H), 2.17 – 2.11 (m, 2H), 2.09 – 1.98 (m, 4H), 1.96 – 1.80 (m, 3H), 1.60 (d, *J* = 4.9 Hz, 4H), 1.39 (s, 3H), 1.08 (s, 3H), 0.91 (d, *J* = 6.6 Hz, 3H); <sup>13</sup>C NMR (101 MHz, CDCl<sub>3</sub>) δ 211.9, 209.0, 208.6, 172.2, 156.5, 151.9, 145.9, 128.9, 126.8, 126.2 (d, *J* = 286.6 Hz), 125.8, 125.4, 121.8, 112.5, 104.9, 99.2, 58.6 (d, *J* = 31.2 Hz), 56.9, 51.7, 49.1, 48.9, 46.8, 45.6, 45.5, 44.9, 42.7, 38.6, 36.4, 36.0, 35.4, 35.2, 33.9, 31.5, 30.3, 27.6, 25.6, 25.1, 24.9, 21.8, 18.6, 11.8; <sup>19</sup>F NMR (376 MHz, CDCl<sub>3</sub>) δ -76.1; HRMS (ESI) *m/z* 677.3085 (M+H<sup>+</sup>), calc. for C<sub>40</sub>H<sub>43</sub>F<sub>3</sub>O<sub>6</sub> 677.3086.

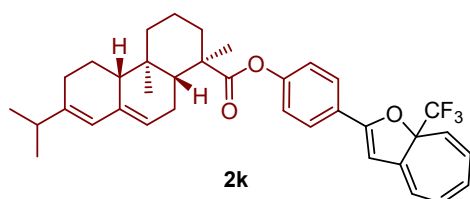

**4-(8a-(trifluoromethyl)-8aH-cyclohepta[b]furan-2-yl)phenyl (1R,4aR,4bR,10aR)-7-isopropyl-1,4a-dimethyl-1,2,3,4,4a,4b,5,6,10,10a-decahydrophenanthrene-1-carboxylate (2k):**

white solid; Mp 98.7 – 99.7 °C; 56.4 mg, 98% yield;  $^1\text{H}$  NMR (400 MHz,  $\text{CDCl}_3$ )  $\delta$  7.69 (d,  $J$  = 8.6 Hz, 2H), 7.09 (d,  $J$  = 8.7 Hz, 2H), 6.56 – 6.41 (m, 4H), 5.89 – 5.71 (m, 2H), 5.45 (d,  $J$  = 1.9 Hz, 1H), 5.29 (d,  $J$  = 10.3 Hz, 1H), 2.37 – 2.17 (m, 3H), 2.04 – 1.94 (m, 3H), 1.90 – 1.81 (m, 2H), 1.69 (dd,  $J$  = 13.2, 8.1 Hz, 2H), 1.42 (d,  $J$  = 4.7 Hz, 3H), 1.37 – 1.18 (m, 5H), 1.05 (dd,  $J$  = 6.8, 3.8 Hz, 5H), 0.92 (d,  $J$  = 3.2 Hz, 3H);  $^{13}\text{C}$  NMR (101 MHz,  $\text{CDCl}_3$ )  $\delta$  176.7, 156.5, 152.4, 145.9, 145.5, 135.6, 128.8, 126.7, 126.2 (q,  $J$  = 287.1 Hz), 125.8, 125.7, 125.4, 122.3, 121.8, 120.3, 112.5, 104.9, 99.1, 58.6 (q,  $J$  = 31.2 Hz), 50.9, 46.9, 45.0, 38.2, 37.0, 34.9, 34.6, 31.6, 27.4, 25.8, 22.6, 22.4, 21.4, 20.8, 18.1, 17.1, 14.1, 14.0;  $^{19}\text{F}$  NMR (376 MHz,  $\text{CDCl}_3$ )  $\delta$  -76.0; HRMS (ESI)  $m/z$  577.2924 ( $\text{M}+\text{H}^+$ ), calc. for  $\text{C}_{36}\text{H}_{39}\text{F}_3\text{O}_3$  577.2929.

**4-(3a-(trifluoromethyl)-3aH-cyclohepta[b]furan-2-yl)phenyl-5-(2,5-dimethylphenoxy)-2,2-dimethylpentanoate (2l):**

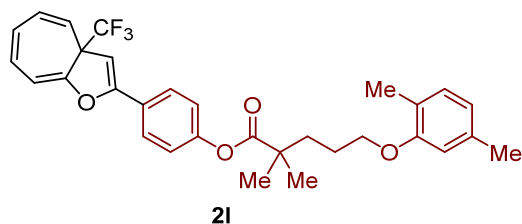

**2,2-dimethylpentanoate (2l):** yellow oil; 48.2 mg, 92% yield;  $^1\text{H}$  NMR (400 MHz,  $\text{CDCl}_3$ )  $\delta$  7.69 (d,  $J$  = 8.7 Hz, 2H), 7.10 (d,  $J$  = 8.7 Hz, 2H), 7.02 (d,  $J$  = 7.5 Hz, 1H), 6.69 (d,  $J$  = 7.5 Hz, 1H),

6.64 (s, 1H), 6.54 – 6.41 (m, 4H), 5.78 (s, 1H), 5.29 (d,  $J$  = 10.3 Hz, 1H), 4.01 (t,  $J$  = 5.1 Hz, 2H), 2.32 (s, 3H), 2.19 (s, 3H), 1.91 (s, 4H), 1.40 (s, 6H);  $^{13}\text{C}$  NMR (101 MHz,  $\text{CDCl}_3$ )  $\delta$  176.1, 156.8, 156.6, 152.3, 145.9, 136.5, 130.4, 128.9, 126.8, 126.2 (d,  $J$  = 286.8 Hz), 125.8, 125.5, 123.6, 121.9, 120.8, 112.6, 111.9, 104.9, 99.2, 67.7, 58.6 (d,  $J$  = 31.2 Hz), 42.5, 37.1, 25.2, 21.4, 15.8;  $^{19}\text{F}$  NMR (376 MHz,  $\text{CDCl}_3$ )  $\delta$  -76.1; HRMS (ESI)  $m/z$  525.2247 ( $\text{M}+\text{H}^+$ ), calc. for  $\text{C}_{31}\text{H}_{31}\text{F}_3\text{O}_4$  525.2248.

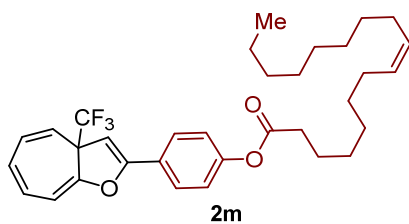

**4-(3a-(trifluoromethyl)-3aH-cyclohepta[b]furan-2-yl)phenyl (Z)-heptadec-8-enoate (2m):** yellow oil; 46.6 mg, 86% yield;  $^1\text{H}$  NMR (600 MHz,  $\text{CDCl}_3$ )  $\delta$  7.69 (d,  $J$  = 8.7 Hz, 2H), 7.15 (d,  $J$  = 8.7 Hz, 2H), 6.57 – 6.37 (m, 4H), 5.77 (s, 1H), 5.42 – 5.33 (m, 2H), 5.28 (d,  $J$  = 11.1 Hz, 1H), 2.57 (t,  $J$  = 7.5 Hz, 2H), 2.06 – 2.01 (m, 3H), 1.80 – 1.74 (m, 2H), 1.45 – 1.24 (m, 22H), 0.89 (t,  $J$  = 7.0 Hz, 3H);  $^{13}\text{C}$  NMR

(151 MHz, CDCl<sub>3</sub>) δ 171.9, 156.6, 151.9, 145.9, 130.0, 129.7, 128.9, 126.8, 126.2 (q,  $J = 286.9$  Hz), 125.8, 125.5, 121.9, 112.6, 104.9, 99.2, 58.6 (q,  $J = 31.2$  Hz), 34.4, 31.9, 29.8, 29.7, 29.5, 29.3, 29.1, 27.2, 27.1, 24.8, 22.7, 14.1; <sup>19</sup>F NMR (565 MHz, CDCl<sub>3</sub>) δ -76.1; HRMS (ESI)  $m/z$  543.3081 (M+H<sup>+</sup>), calc. for C<sub>33</sub>H<sub>41</sub>F<sub>3</sub>O<sub>3</sub> 543.3078.

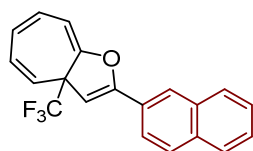**2n**

**2-(naphthalen-1-yl)-3a-(trifluoromethyl)-3aH-cyclohepta[b]furan**

**(2n)**: white solid; Mp 105.3 – 106.9 °C; 29.7 mg, 91% yield; <sup>1</sup>H NMR (300 MHz, CDCl<sub>3</sub>) δ 8.20 (s, 1H), 7.94 – 7.83 (m, 3H), 7.72 (dd,  $J = 8.6, 1.6$  Hz, 1H), 7.58 – 7.51 (m, 2H), 6.62 – 6.43 (m, 4H), 5.94 (s, 1H),

5.34 (d,  $J = 10.4$  Hz, 1H); <sup>13</sup>C NMR (75 MHz, CDCl<sub>3</sub>) δ 133.8, 132.9, 128.9, 128.6, 128.4, 127.7, 126.3 (q,  $J = 286.7$  Hz), 127.1, 126.7, 125.9, 125.4, 125.4, 125.3, 122.7, 112.6, 104.7, 99.8, 58.7 (q,  $J = 31.2$  Hz); <sup>19</sup>F NMR (565 MHz, CDCl<sub>3</sub>) δ -76.0; HRMS (ESI)  $m/z$  327.0991 (M+H<sup>+</sup>), calc. for C<sub>20</sub>H<sub>13</sub>F<sub>3</sub>O 329.0992.

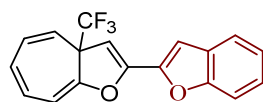**2o**

**2-(benzofuran-2-yl)-3a-(trifluoromethyl)-3aH-cyclohepta[b]furan**

**(2o)**: white solid; Mp 94.3 – 95.0 °C; 27.5 mg, 87% yield; <sup>1</sup>H NMR (600 MHz, CDCl<sub>3</sub>) δ 7.63 (d,  $J = 7.7$  Hz, 1H), 7.52 (d,  $J = 8.3$  Hz, 1H), 7.37 (t,  $J = 7.7$  Hz, 1H), 7.28 (t,  $J = 7.5$  Hz,

1H), 7.06 (s, 1H), 6.56 – 6.45 (m, 4H), 5.99 (s, 1H), 5.33 (d,  $J = 10.1$  Hz, 1H); <sup>13</sup>C NMR (151 MHz, CDCl<sub>3</sub>) δ 155.3, 149.2, 145.6, 145.4, 129.1, 127.7, 126.1 (q,  $J = 286.6$  Hz), 125.9, 125.8, 125.7, 123.5, 121.9, 112.6, 111.4, 106.4, 105.3, 101.4, 58.4 (q,  $J = 31.7$  Hz); <sup>19</sup>F NMR (565 MHz, CDCl<sub>3</sub>) δ -75.9; HRMS (ESI)  $m/z$  317.0784 (M+H<sup>+</sup>), calc. for C<sub>18</sub>H<sub>11</sub>F<sub>3</sub>O<sub>2</sub> 317.0783.

**2-(benzo[b]thiophen-3-yl)-3a-(trifluoromethyl)-3aH-cyclohepta[b]furan (2p)**: white solid;

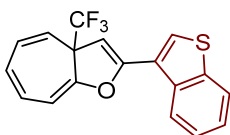**2p**

29.5 mg, 89% yield; <sup>1</sup>H NMR (400 MHz, CDCl<sub>3</sub>) δ 8.08 (d,  $J = 8.0$  Hz, 1H), 7.89 (s, 1H), 7.51 – 7.39 (m, 2H), 6.57 – 6.32 (m, 4H), 5.88 (s, 1H), 5.33 (d,  $J = 10.2$  Hz, 1H); <sup>13</sup>C NMR (151 MHz, CDCl<sub>3</sub>) δ 152.8, 145.3,

140.5, 135.7, 129.0, 128.0, 126.3 (q,  $J = 286.7$  Hz), 125.9, 125.5, 125.1, 125.0, 124.7, 123.0, 122.9, 112.7, 104.7, 100.2, 58.7 (q,  $J = 31.1$  Hz); <sup>19</sup>F NMR (565 MHz, CDCl<sub>3</sub>) δ -76.1; HRMS (ESI)  $m/z$  333.0555 (M+H<sup>+</sup>), calc. for C<sub>18</sub>H<sub>11</sub>F<sub>3</sub>OS 333.0558.

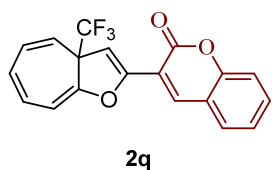

**3-(3a-(trifluoromethyl)-3aH-cyclohepta[b]furan-2-yl)-2H-chromen-2-one (2q):** white solid; Mp 162.3 – 163.5 °C; 32.0 mg, 93% yield; <sup>1</sup>H NMR (600 MHz, CDCl<sub>3</sub>) δ 7.63 (d, *J* = 7.7 Hz, 1H), 7.52 (d,

*J* = 8.3 Hz, 1H), 7.37 (t, *J* = 7.7 Hz, 1H), 7.28 (t, *J* = 7.5 Hz, 1H), 7.06

(s, 1H), 6.56 – 6.45 (m, 4H), 5.99 (s, 1H), 5.33 (d, *J* = 10.1 Hz, 1H); <sup>13</sup>C NMR (151 MHz, CDCl<sub>3</sub>) δ 155.3, 149.2, 145.6, 145.4, 129.1, 127.7, 126.1 (q, *J* = 286.6 Hz), 125.9, 125.8, 125.7, 123.5, 121.9, 112.6, 111.4, 106.4, 105.3, 101.4, 58.43 (q, *J* = 31.7 Hz), 29.7; <sup>19</sup>F NMR (565 MHz, CDCl<sub>3</sub>) δ -75.9; HRMS (ESI) *m/z* 327.0991 (M+H<sup>+</sup>), calc. for C<sub>19</sub>H<sub>11</sub>F<sub>3</sub>O<sub>3</sub> 327.0992.

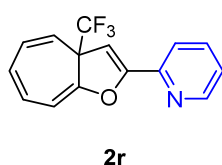

**2-(3a-(trifluoromethyl)-3aH-cyclohepta[b]furan-2-yl)pyridine (2r):**

yellow oil; 23.5 mg, 85% yield; <sup>1</sup>H NMR (400 MHz, CDCl<sub>3</sub>) δ 8.64 (d, *J* = 4.2 Hz, 1H), 7.74 (td, *J* = 7.7, 1.7 Hz, 1H), 7.65 (d, *J* = 7.9 Hz, 1H), 7.29

– 7.23 (m, 1H), 6.54 (d, *J* = 6.9 Hz, 1H), 6.50 – 6.36 (m, 3H), 6.27 (s, 1H),

5.31 (d, *J* = 10.4 Hz, 1H); <sup>13</sup>C NMR (101 MHz, CDCl<sub>3</sub>) δ 156.6, 149.9, 147.3, 146.0, 136.8, 129.0, 127.6, 125.8 (d, *J* = 12.4 Hz), 124.3, 120.6, 112.3, 105.4, 103.2, 58.6 (q, *J* = 31.4 Hz); <sup>19</sup>F NMR (376 MHz, CDCl<sub>3</sub>) δ -75.8; HRMS (ESI) *m/z* 278.0787 (M+H<sup>+</sup>), calc. for C<sub>15</sub>H<sub>10</sub>F<sub>3</sub>NO 278.0784.

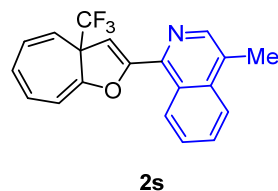

**4-methyl-1-(3a-(trifluoromethyl)-3aH-cyclohepta[b]furan-2-yl)isoquinoline (2s):** black solid; 27.0 mg, 79% yield; <sup>1</sup>H NMR (600 MHz, CD<sub>2</sub>Cl<sub>2</sub>) δ 9.23 (d, *J* = 5.5 Hz, 1H), 9.16 (d, *J* = 8.8 Hz, 1H),

8.38 – 8.34 (m, 2H), 8.23 – 8.20 (m, 1H), 7.34 (d, *J* = 7.0 Hz, 1H),

7.30 – 7.19 (m, 3H), 6.90 (s, 1H), 6.13 (d, *J* = 10.2 Hz, 1H), 6.03 (t, *J* = 1.1 Hz, 2H), 3.26 (s, 3H); <sup>13</sup>C NMR (151 MHz, CD<sub>2</sub>Cl<sub>2</sub>) δ 157.5, 147.3, 146.2, 142.3, 141.1, 137.3, 130.5, 129.2, 126.4 (d, *J* = 287.2 Hz), 126.1, 125.9, 125.8, 125.0, 121.8, 112.1, 106.7, 105.5, 58.3 (d, *J* = 31.4 Hz), 21.7; <sup>19</sup>F NMR (565 MHz, CD<sub>2</sub>Cl<sub>2</sub>) δ -75.6; HRMS (ESI) *m/z* 342.1100 (M+H<sup>+</sup>), calc. for C<sub>20</sub>H<sub>14</sub>F<sub>3</sub>NO 342.1099.

**2-(3a-(trifluoromethyl)-3aH-cyclohepta[b]furan-2-yl)benzo[*h*]quinoline (2t):** white solid;

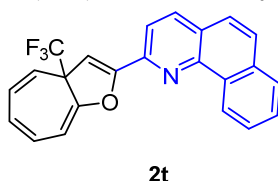

Mp 158.9 – 159.2 °C; 32.8 mg, 87% yield; <sup>1</sup>H NMR (300 MHz, CDCl<sub>3</sub>) δ 9.39 (dd, *J* = 7.7, 1.7 Hz, 1H), 8.22 (d, *J* = 8.3 Hz, 1H), 7.97

– 7.63 (m, 6H), 6.78 – 6.31 (m, 5H), 5.43 (d, *J* = 10.3 Hz, 1H); <sup>13</sup>C

NMR (151 MHz, CD<sub>2</sub>Cl<sub>2</sub>)  $\delta$  157.4, 146.4, 146.2, 145.7, 134.0, 131.3, 129.2, 128.7, 128.7, 128.0, 127.3, 126.8 (q,  $J$  = 286.1 Hz), 125.9, 125.8, 125.1, 124.5, 118.6, 112.4, 105.5, 103.4, 77.0, 58.8 (q,  $J$  = 31.1 Hz); <sup>19</sup>F NMR (565 MHz, CD<sub>2</sub>Cl<sub>2</sub>)  $\delta$  -76.0; HRMS (ESI)  $m/z$  378.1100 (M+H<sup>+</sup>), calc. for C<sub>23</sub>H<sub>14</sub>F<sub>3</sub>NO 378.1104.

**1-(3a-(trifluoromethyl)-3aH-cyclohepta[b]furan-2-yl) benzo[h]isoquinoline (2u):** white

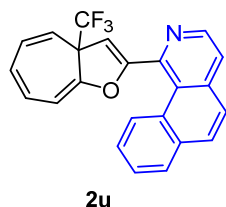

solid; 31.3 mg, 83% yield; <sup>1</sup>H NMR (300 MHz, CD<sub>2</sub>Cl<sub>2</sub>)  $\delta$  8.76 (d,  $J$  = 8.4 Hz, 1H), 8.68 (d,  $J$  = 7.5 Hz, 1H), 8.66 – 8.57 (m, 1H), 8.25 (dd,  $J$  = 8.0, 1.7 Hz, 1H), 7.97 (t,  $J$  = 7.0 Hz, 1H), 7.87 – 7.72 (m, 3H), 6.88 – 6.41 (m, 4H), 6.27 (d,  $J$  = 1.1 Hz, 1H), 5.52 (d,  $J$  = 10.0 Hz, 1H), 5.39 – 5.29 (m, 1H); <sup>13</sup>C NMR (75 MHz, CD<sub>2</sub>Cl<sub>2</sub>)  $\delta$  156.9, 148.7, 146.0, 143.4, 133.3, 131.2, 130.6, 129.3, 129.2, 128.2, 127.9, 127.2, 125.9, 124.4, 122.4, 122.2, 112.0, 107.4, 105.7, 58.5 (d,  $J$  = 31.4 Hz); <sup>19</sup>F NMR (565 MHz, CD<sub>2</sub>Cl<sub>2</sub>)  $\delta$  -76.0; HRMS (ESI)  $m/z$  378.1100 (M+H<sup>+</sup>), calc. for C<sub>23</sub>H<sub>14</sub>F<sub>3</sub>NO 378.1104.

**2-(3a-(trifluoromethyl)-3aH-cyclohepta[b]furan-2-yl)thiazole(2v):** white solid; 24.1 mg,

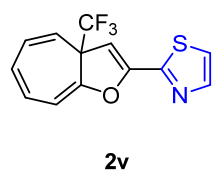

85% yield; <sup>1</sup>H NMR (600 MHz, CDCl<sub>3</sub>)  $\delta$  7.94 (d,  $J$  = 3.1 Hz, 1H), 7.47 (d,  $J$  = 3.1 Hz, 1H), 6.56 (d,  $J$  = 6.6 Hz, 1H), 6.52 – 6.45 (m, 3H), 6.20 (s, 1H), 5.32 (d,  $J$  = 10.1 Hz, 1H); <sup>13</sup>C NMR (151 MHz, CDCl<sub>3</sub>)  $\delta$  155.9, 151.5, 145.1, 144.4, 129.2, 126.0, 125.9 (q,  $J$  = 287.0 Hz), 125.7, 120.8, 112.3, 105.8, 102.6, 58.6 (q,  $J$  = 31.6 Hz); <sup>19</sup>F NMR (565 MHz, CDCl<sub>3</sub>)  $\delta$  -75.8; HRMS (ESI)  $m/z$  284.0451 (M+H<sup>+</sup>), calc. for C<sub>13</sub>H<sub>8</sub>F<sub>3</sub>NOS 284.0451.

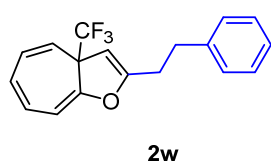

**2-phenethyl-3a-(trifluoromethyl)-3aH-cyclohepta[b]furan(2w):** yellow oil; 22.8 mg, 75% yield; <sup>1</sup>H NMR (300 MHz, CDCl<sub>3</sub>)  $\delta$  7.39 – 7.28 (m, 3H), 7.25 (t,  $J$  = 5.5 Hz, 2H), 6.52 – 6.39 (m, 4H), 5.20 (d,  $J$  = 8.5 Hz, 2H), 3.00 – 2.92 (m, 2H), 2.72 – 2.63 (m, 2H); <sup>13</sup>C NMR (75 MHz, CDCl<sub>3</sub>)  $\delta$  159.9, 146.5, 140.4, 128.7, 128.5, 128.4, 126.3, 126.1 (q,  $J$  = 12.6 Hz), 125.9, 125.2, 112.5, 104.2, 101.0, 58.1 (q,  $J$  = 31.0 Hz); 32.5, 29.5; <sup>19</sup>F NMR (565 MHz, CDCl<sub>3</sub>)  $\delta$  -76.4; HRMS (ESI)  $m/z$  305.1148 (M+H<sup>+</sup>), calc. for C<sub>18</sub>H<sub>15</sub>F<sub>3</sub>O 305.1148.

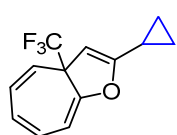**2x**

**2-cyclopropyl-3a-(trifluoromethyl)-3aH-cyclohepta[b]furan (2x):** yellow oil; 22.8 mg, 75% yield;  $^1\text{H}$  NMR (600 MHz,  $\text{CDCl}_3$ )  $\delta$  6.43 – 6.38 (m, 2H), 6.37 – 6.33 (m, 1H), 6.30 (dt,  $J = 7.2, 1.0$  Hz, 1H), 5.17 (d,  $J = 10.0$  Hz, 1H), 5.14 (s, 1H), 1.67 – 1.53 (m, 1H), 0.91 – 0.76 (m, 4H);  $^{13}\text{C}$  NMR (151 MHz,  $\text{CDCl}_3$ )  $\delta$  161.5, 146.4, 128.5, 126.3 (q,  $J = 286.4$  Hz), 125.7, 125.1, 112.9, 104.1, 98.3, 98., 98.3, 58.1 (q,  $J = 31.1$  Hz), 8.3, 6.1, 5.8;  $^{19}\text{F}$  NMR (565 MHz,  $\text{CDCl}_3$ )  $\delta$  -76.6; HRMS (ESI)  $m/z$  241.0835 ( $\text{M}+\text{H}^+$ ), calc. for  $\text{C}_{13}\text{H}_{11}\text{F}_3\text{O}$  241.0836.

**2-((1r,3R,5S,7s)-adamantan-1-yl)-3a-(trifluoromethyl)-3aH-cyclohepta[b]furan(2y):**

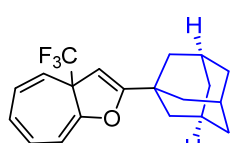**2y**

white solid; Mp 116.7 – 117.1 °C; 24.4 mg, 73% yield;  $^1\text{H}$  NMR (300 MHz,  $\text{CDCl}_3$ )  $\delta$  6.46 – 6.32 (m, 4H), 5.18 (d,  $J = 10.2$  Hz, 1H), 5.04 (s, 1H), 2.04 (s, 3H), 1.84 (s, 6H), 1.77 (d,  $J = 14.9$  Hz, 6H);  $^{13}\text{C}$  NMR (75 MHz,  $\text{CDCl}_3$ )  $\delta$  168.6, 146.9, 128.5, 126.4 (d,  $J = 286.5$  Hz), 125.9, 124.7, 112.5, 103.9, 97.1, 57.9 (q,  $J = 30.6$  Hz), 39.5, 36.6, 34.1, 27.8;  $^{19}\text{F}$  NMR (565 MHz,  $\text{CDCl}_3$ )  $\delta$  -76.70; HRMS (ESI)  $m/z$  335.1617 ( $\text{M}+\text{H}^+$ ), calc. for  $\text{C}_{20}\text{H}_{21}\text{F}_3\text{O}$  335.1621.

**6,8-dimethyl-2-phenyl-3a-(trifluoromethyl)-3aH-cyclohepta[b]furan(2za):** white solid; Mp

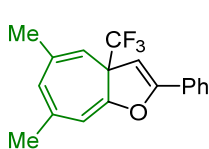**2za**

98.3 – 99.7 °C; 22.2 mg, 73% yield;  $^1\text{H}$  NMR (400 MHz,  $\text{CDCl}_3$ )  $\delta$  7.66 (dd,  $J = 7.3, 2.3$  Hz, 2H), 7.45 – 7.36 (m, 3H), 6.25 (s, 1H), 6.14 (s, 1H), 5.71 (s, 1H), 5.05 (s, 1H), 2.10 (s, 3H), 2.01 (s, 3H);  $^{13}\text{C}$  NMR (101 MHz,  $\text{CDCl}_3$ )  $\delta$  156.9, 146.9, 136.9, 133.8, 129.8, 128.5, 128.4, 126.5 (q,  $J = 287.0$  Hz), 126.2, 125.6, 109.1, 107.0, 99.6, 57.2 (q,  $J = 30.7$  Hz), 25.3, 24.3;  $^{19}\text{F}$  NMR (376 MHz,  $\text{CDCl}_3$ )  $\delta$  -75.8; HRMS (ESI)  $m/z$  305.1148 ( $\text{M}+\text{H}^+$ ), calc. for  $\text{C}_{18}\text{H}_{15}\text{F}_3\text{O}$  305.1148.

**2-phenyl-3a-(trifluoromethyl)-3aH-benzo[5,6]cyclohepta[1,2-b]furan (2zb):** yellow solid;

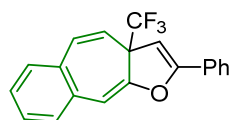**2zb**

Mp 117.6 – 119.6 °C; 27.7 mg, 85% yield;  $^1\text{H}$  NMR (600 MHz,  $\text{CDCl}_3$ )  $\delta$  8.20 (s, 1H), 7.91 (dt,  $J = 6.8, 3.5$  Hz, 1H), 7.86 (dd,  $J = 10.4, 6.1$  Hz, 2H), 7.72 (dd,  $J = 8.6, 1.5$  Hz, 1H), 7.54 (dd,  $J = 6.2, 3.2$  Hz, 2H), 6.61 (d,  $J = 7.2$  Hz, 1H), 5.94 (s, 1H), 5.35 (d,  $J = 10.3$  Hz, 1H);  $^{13}\text{C}$  NMR (151 MHz,  $\text{CDCl}_3$ )  $\delta$  157.3, 146.0, 133.9, 132.9, 128.9, 128.6, 128.4, 127.8, 127.1, 126.7, 126.3 (q,  $J = 287.0$  Hz), 125.9, 125.4, 125.4, 125.3, 122.8, 112.6, 104.9, 99.8, 58.7 (q,  $J = 31.2$  Hz);  $^{19}\text{F}$  NMR (565 MHz,  $\text{CDCl}_3$ )  $\delta$  -75.9; HRMS (ESI)  $m/z$  272.1443 ( $\text{M}+\text{H}^+$ ), calc. for  $\text{C}_{17}\text{H}_{19}\text{FNO}$  272.1445.



**2-phenyl-3a-(trifluoromethyl)-3aH-naphtho[2',3':5,6]cyclohepta[1,2-b]furan (2zc):**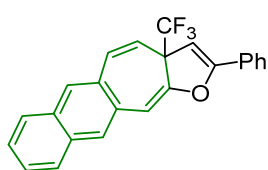**2zc**

yellow solid; Mp 98.8 – 100.2 °C; 32.7 mg, 87% yield;  $^1\text{H}$  NMR (300 MHz,  $\text{CDCl}_3$ )  $\delta$  7.94 (s, 1H), 7.89 – 7.77 (m, 2H), 7.75 (s, 1H), 7.67 – 7.58 (m, 2H), 7.53 – 7.45 (m, 2H), 7.44 – 7.34 (m, 3H), 6.88 (d,  $J = 9.9$  Hz, 1H), 6.46 (dd,  $J = 9.9, 1.3$  Hz, 1H), 6.04 (s, 1H), 2.89 (s, 1H);  $^{13}\text{C}$  NMR (151 MHz,  $\text{CDCl}_3$ )  $\delta$  157.7, 133.3, 132.6, 130.0, 129.4, 129.3, 129.1, 128.5, 128.0, 127.6, 127.4, 127.2, 126.5, 126.1, 125.1, 123.2 (q,  $J = 275.1$  Hz), 119.2, 99.0, 71.7, 33.7 (q,  $J = 36.3$  Hz), 32.0;  $^{19}\text{F}$  NMR (565 MHz,  $\text{CDCl}_3$ )  $\delta$  -62.1; HRMS (ESI)  $m/z$  377.1148 ( $\text{M}+\text{H}^+$ ), calc. for  $\text{C}_{24}\text{H}_{15}\text{F}_3\text{O}$  377.1150.

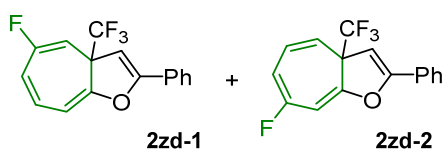**2zd-1****2zd-2****6-fluoro-2-phenyl-3a-(trifluoromethyl)-3aH-****cyclohepta[b]furan (2zd-1) and 7-fluoro-2-phenyl-****3a-(trifluoromethyl)-3aH-cyclohepta[b]furan (2zd-**

**2):** white solid; Mp 117.6 – 119.6 °C; 10.3 mg, 35% yield; **2zd-1:**  $^1\text{H}$  NMR (600 MHz,  $\text{CDCl}_3$ )  $\delta$  7.68 (s, 2H), 7.48 – 7.44 (m, 3H), 6.54 (td,  $J = 7.6, 3.7$  Hz, 1H), 6.42 (d,  $J = 5.3$  Hz, 1H), 6.31 (td,  $J = 11.6, 2.0$  Hz, 1H), 5.71 (s, 1H), 5.11 (d,  $J = 17.8$  Hz, 1H); **2zd-2:**  $^1\text{H}$  NMR (600 MHz,  $\text{CDCl}_3$ )  $\delta$  7.69 – 7.66 (m, 2H), 7.44 – 7.42 (m, 3H), 6.49 (dt,  $J = 9.0, 1.6$  Hz, 1H), 6.42 – 6.38 (m, 1H), 6.23 – 6.13 (m, 1H), 5.82 (d,  $J = 1.1$  Hz, 1H), 5.19 (d,  $J = 10.3$  Hz, 1H).  $^{13}\text{C}$  NMR (151 MHz,  $\text{CDCl}_3$ )  $\delta$  160.7, 159.8, 158.2, 157.6, 157.5, 149.2, 147.7, 147.5, 130.2, 128.8, 128.7, 128.7, 127.8, 127.7, 126.7, 126.1, 126.0, 125.7, 125.6, 124.8, 118.6, 118.4, 109.7, 106.4, 106.2, 103.9, 100.3, 100.1, 99.3, 98.6, 94.5, 94.3, 58.8 (q,  $J = 31.1$  Hz);  $^{19}\text{F}$  NMR (565 MHz,  $\text{CDCl}_3$ )  $\delta$  -76.1, -77.4; HRMS (ESI)  $m/z$  295.0741 ( $\text{M}+\text{H}^+$ ), calc. for  $\text{C}_{16}\text{H}_{10}\text{F}_4\text{O}$  295.0744.

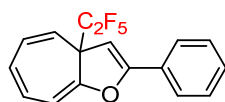**2ze****3a-(perfluoroethyl)-2-phenyl-3aH-cyclohepta[b]furan(2ze):**

white solid; Mp 68.2 – 70.0 °C 27.7 mg, 92% yield;  $^1\text{H}$  NMR (600 MHz,  $\text{CDCl}_3$ )  $\delta$  7.72 – 7.64 (m, 2H), 7.48 – 7.37 (m, 3H), 6.59 (d,  $J = 7.2$  Hz, 1H), 6.49 (dd,  $J = 16.8, 9.9$  Hz, 2H), 6.44 (dd,  $J = 11.0, 6.6$  Hz, 1H), 5.78 (s, 1H), 5.27 (d,  $J = 10.2$  Hz, 1H);  $^{13}\text{C}$  NMR (151 MHz,  $\text{CDCl}_3$ )  $\delta$  157.0, 145.2, 130.0, 128.8, 128.6, 128.3, 126.1, 125.7, 121.3 (qt,  $J = 290.5, 35.1$  Hz), 111.7, 114.30 (td,  $J = 234.7, 31.2$  Hz), 105.7, 99.0, 57.8 (t,  $J = 24.2$  Hz);  $^{19}\text{F}$  NMR (565 MHz,  $\text{CDCl}_3$ )  $\delta$  -79.09, -119.66 – -121.66 (m, 2F); HRMS (ESI)  $m/z$  327.0803 ( $\text{M}+\text{H}^+$ ), calc. for  $\text{C}_{17}\text{H}_{11}\text{F}_5\text{O}$  327.0804.

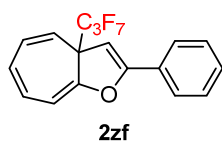

**3a-(perfluoropropyl)-2-phenyl-3aH-cyclohepta[b]furan (2zf):** white solid; Mp 67.2 – 67.6 °C; 27.7 mg, 98% yield;  $^1\text{H}$  NMR (400 MHz,  $\text{CDCl}_3$ )  $\delta$  7.72 – 7.67 (m, 2H), 7.47 – 7.38 (m, 3H), 6.59 (d,  $J = 7.2$  Hz, 1H), 6.55 – 6.40 (m, 3H), 5.87 – 5.79 (m, 1H), 5.30 (dd,  $J = 10.2, 1.7$  Hz, 1H);  $^{13}\text{C}$  NMR (101 MHz,  $\text{CDCl}_3$ )  $\delta$  157.0, 145.1, 130.0, 128.7, 128.6, 128.3, 126.1, 125.6, 118.4 (qt,  $J = 290.5, 35.1$  Hz), 113.1 (tq,  $J = 136.4, 6.04$  Hz), 108.3 (tq,  $J = 167.7, 39.5$  Hz), 105.9, 98.9 (q,  $J = 3.2$  Hz), 59.0 (t,  $J = 24.8$  Hz);  $^{19}\text{F}$  NMR (376 MHz,  $\text{CDCl}_3$ )  $\delta$  -81.2, -116.7 – -117.8 (m, 2F), -121.3 – -125.3 (m, 2F); HRMS (ESI)  $m/z$  377.0771 ( $\text{M}+\text{H}^+$ ), calc. for  $\text{C}_{18}\text{H}_{11}\text{F}_7\text{O}$  377.0771.

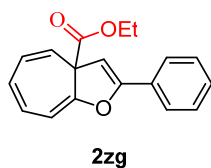

**Ethyl-2-phenyl-3aH-cyclohepta[b]furan-3a-carboxylate (2zg):** yellow oil; 20.4 mg, 73% yield;  $^1\text{H}$  NMR (600 MHz,  $\text{CDCl}_3$ )  $\delta$  7.68 – 7.65 (m, 2H), 7.41 – 7.36 (m, 3H), 6.57 – 6.49 (m, 1H), 6.41 – 6.31 (m, 3H), 5.91 (d,  $J = 1.1$  Hz, 1H), 5.45 – 5.39 (m, 1H), 4.07 – 3.96 (m, 2H), 1.13 (t,  $J = 7.1$  Hz, 3H);  $^{13}\text{C}$  NMR (151 MHz,  $\text{CDCl}_3$ )  $\delta$  170.0, 156.6, 151.7, 129.6, 128.5, 126.8, 125.6, 124.6, 116.8, 102.5, 101.4, 61.4, 59.9, 14.1; HRMS (ESI)  $m/z$  267.1016 ( $\text{M}+\text{H}^+$ ), calc. for  $\text{C}_{18}\text{H}_{16}\text{O}_3$  267.1016; HRMS (ESI)  $m/z$  377.0771 ( $\text{M}+\text{H}^+$ ), calc. for  $\text{C}_{18}\text{H}_{11}\text{F}_7\text{O}$  377.0771.

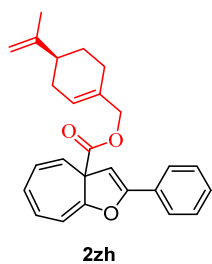

**((S)-4-(prop-1-en-2-yl)cyclohex-1-en-1-yl)methyl-2-phenyl-3aH-cyclohepta[b]furan-3a-carboxylate (2zh):** yellow oil; 25.1 mg, 65% yield;  $^1\text{H}$  NMR (400 MHz,  $\text{CDCl}_3$ )  $\delta$  7.68 – 7.64 (m, 2H), 7.39 (qd,  $J = 3.8, 1.9$  Hz, 3H), 6.56 – 6.49 (m, 1H), 6.41 – 6.31 (m, 3H), 5.92 (d,  $J = 1.1$  Hz, 1H), 5.65 (d,  $J = 4.1$  Hz, 1H), 5.48 – 5.39 (m, 1H), 4.71 (dq,  $J = 9.7, 1.3$  Hz, 2H), 4.36 (d,  $J = 4.2$  Hz, 2H), 2.18 – 2.05 (m, 3H), 1.97 – 1.90 (m, 3H), 1.73 (t,  $J = 1.1$  Hz, 3H), 1.59 (s, 1H), 1.43 (s, 1H), 1.34 (s, 1H), 1.29 (s, 2H), 1.26 (d,  $J = 2.1$  Hz, 1H);  $^{13}\text{C}$  NMR (151 MHz,  $\text{CD}_2\text{Cl}_2$ )  $\delta$  169.7, 151.8, 149.9, 132.6, 129.8, 128.7, 126.8, 125.5, 124.7, 117.0, 108.5, 103.0, 101.4, 69.0, 60.2, 40.9, 30.5, 27.4, 26.1, 25.2, 20.6; HRMS (ESI)  $m/z$  387.1955 ( $\text{M}+\text{H}^+$ ), calc. for  $\text{C}_{26}\text{H}_{26}\text{O}_3$  387.1956.

**2-(3,4-dimethoxyphenyl)-3aH-cyclohepta[b]furan-3a-carbonitrile (2zi):** white solid; Mp 147.0 – 148.1 °C; 23.4 mg, 80% yield;  $^1\text{H}$  NMR (400 MHz,  $\text{CDCl}_3$ )  $\delta$  7.41 (dd,  $J = 8.4, 1.9$  Hz, 1H), 7.37 – 7.31 (m, 3H), 7.24 – 7.17 (m, 4H), 6.75 (d,  $J = 8.4$  Hz, 1H), 3.84 (s, 3H), 3.81 (s, 3H);  $^{13}\text{C}$  NMR (151 MHz,  $\text{CDCl}_3$ )  $\delta$  189.8, 154.5, 149.4, 139.7, 131.2, 130.3, 128.8, 128.4, 128.4, 124.8, 122.1,

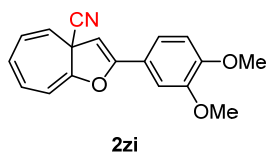

118.0, 110.2, 110.0, 56.1, 55.9; HRMS (ESI)  $m/z$  294.1125 ( $M+H^+$ ), calc. for  $C_{18}H_{15}NO_3$  294.1125.

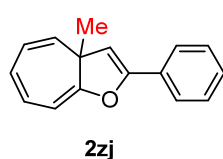

**3a-methyl-2-phenyl-3aH-cyclohepta[b]furan (2zj):** grey solid; Mp 39.0 – 40.6 °C; 19.1 mg, 86% yield;  $^1H$  NMR (300 MHz,  $CDCl_3$ )  $\delta$  7.66 (d,  $J$  = 6.7 Hz, 2H), 7.44 – 7.33 (m, 3H), 6.46 (dd,  $J$  = 10.9, 6.9 Hz, 1H), 6.32 (dd,  $J$  = 10.8, 6.4 Hz, 1H), 6.26 – 6.14 (m, 2H), 5.78 (s, 1H), 5.39 (d,  $J$  = 9.8 Hz, 1H), 0.88 (s, 3H);  $^{13}C$  NMR (75 MHz,  $CDCl_3$ )  $\delta$  156.6, 153.1, 129.4, 128.9, 128.4, 125.9, 125.1, 124.1, 123.8, 120.4, 108.0, 99.0, 49.6, 18.7; HRMS (ESI)  $m/z$  223.1118 ( $M+H^+$ ), calc. for  $C_{16}H_{14}O$  223.1118.

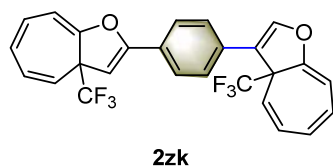

**3a-(trifluoromethyl)-3-(4-(3a-(trifluoromethyl)-3aH-cyclohepta[b]furan-2-yl)phenyl)-3aH-cyclohepta[b]furan (2zk):** yellow solid; 35.6 mg, 75% yield;  $^1H$  NMR (400 MHz,  $CDCl_3$ )  $\delta$  7.72 (s, 4H), 6.57 – 6.37 (m, 8H), 5.87 (s, 2H), 5.29 (d,  $J$  = 10.3 Hz, 2H);  $^{13}C$  NMR (101 MHz,  $CDCl_3$ )  $\delta$  156.5, 145.8, 129.5, 129.0, 127.6, 126.2 (q,  $J$  = 286.6 Hz), 125.9, 125.8, 125.6, 124.8, 112.4, 105.1, 100.4, 58.6 (q,  $J$  = 31.2 Hz);  $^{19}F$  NMR (376 MHz,  $CDCl_3$ )  $\delta$  -76.0; HRMS (ESI)  $m/z$  474.1127 ( $M+H^+$ ), calc. for  $C_{26}H_{16}F_6O_2$  474.1123.

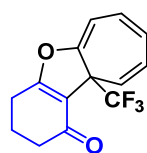

**10a-(trifluoromethyl)-2,3,4,10a-tetrahydro-1H-cyclohepta[b]benzofuran-1-one (2zl):** white solid; Mp 78.5 – 80.1 °C; 23.3 mg, 87% yield;  $^1H$  NMR (400 MHz,  $CDCl_3$ )  $\delta$  6.50 – 6.43 (m, 3H), 6.40 – 6.33 (m, 1H), 5.73 (dd,  $J$  = 8.6, 6.0 Hz, 1H), 2.76 – 2.68 (m, 1H), 2.63 – 2.50 (m, 2H), 2.42 (ddd,  $J$  = 16.6, 8.6, 5.7 Hz, 1H), 2.20 – 2.12 (m, 2H);  $^{13}C$  NMR (75 MHz,  $CDCl_3$ )  $\delta$  192.3, 175.6, 145.4, 129.1, 127.5, 126.0 (q,  $J$  = 288.4 Hz), 124.5, 114.52, 114.2, 107.2, 67.9, 56.0 (q,  $J$  = 32.3 Hz), 37.4, 25.6, 23.5, 21.3;  $^{19}F$  NMR (376 MHz,  $CDCl_3$ )  $\delta$  -74.8; HRMS (ESI)  $m/z$  269.0784 ( $M+H^+$ ), calc. for  $C_{14}H_{11}F_3O_2$  269.0783.

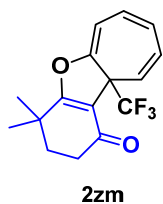

**4,4-dimethyl-10a-(trifluoromethyl)-2,3,4,10a-tetrahydro-1H-cyclohepta[b]benzofuran-1-one (2zm):** white solid; Mp 83.4 – 85.0 °C; 27.5 mg, 93% yield;  $^1H$  NMR (600 MHz,  $CDCl_3$ )  $\delta$  6.50 – 6.43 (m, 3H), 6.37 (tt,  $J$  = 10.0, 3.2 Hz, 1H), 5.78 – 5.59 (m, 1H), 2.51 (dd,  $J$  = 42.1, 17.9 Hz, 2H), 2.43

– 2.25 (m, 2H), 1.17 (s, 3H), 1.14 (s, 3H);  $^{13}\text{C}$  NMR (101 MHz,  $\text{CDCl}_3$ )  $\delta$  191.7, 174.6, 145.7, 129.1, 127.5, 126.07 (q,  $J = 288.1$  Hz), 124.5, 114.5, 113.2, 107.3, 56.0 (q,  $J = 32.2$  Hz), 51.7, 37.2, 34.1, 29.0, 27.7;  $^{19}\text{F}$  NMR (376 MHz,  $\text{CDCl}_3$ )  $\delta$  -74.7; HRMS (ESI)  $m/z$  277.0714 ( $\text{M}+\text{H}^+$ ), calc. for  $\text{C}_{16}\text{H}_{15}\text{F}_3\text{O}_2$  277.0720.

**6b-(trifluoromethyl)-5,6b-dihydro-6H-cyclohepta[b]naphtho[2,1-d]furan (2zn):** white

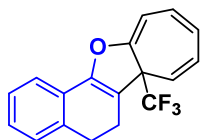

2zn

solid; Mp 88.7 – 89.2 °C; 28.1 mg, 93% yield;  $^1\text{H}$  NMR (400 MHz,  $\text{CDCl}_3$ )  $\delta$  7.46 – 7.36 (m, 1H), 7.26 – 7.20 (m, 3H), 6.59 – 6.35 (m, 4H), 5.27 (d,  $J = 10.1$  Hz, 1H), 3.10 – 2.97 (m, 2H), 2.72 – 2.60 (m, 2H);  $^{13}\text{C}$  NMR (101 MHz,  $\text{CDCl}_3$ )  $\delta$  151.9, 146.8, 136.2, 129.0, 128.9, 127.7, 126.6, 126.37 (q,  $J = 288.5$

Hz), 126.0 (q,  $J = 9.3$  Hz), 125.4, 121.3, 111.4, 111.0, 105.1, 58.8 (q,  $J = 30.6$  Hz), 28.6, 19.4;  $^{19}\text{F}$  NMR (376 MHz,  $\text{CDCl}_3$ )  $\delta$  -74.3; HRMS (ESI)  $m/z$  303.0991 ( $\text{M}+\text{H}^+$ ), calc. for  $\text{C}_{18}\text{H}_{13}\text{F}_3\text{O}$  303.0995.

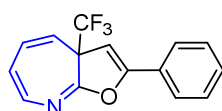

4a

**2-phenyl-3a-(trifluoromethyl)-3aH-furo[2,3-b]azepine (4a):** white

solid; 11.9 mg, 43% yield;  $^1\text{H}$  NMR (400 MHz,  $\text{CDCl}_3$ )  $\delta$  8.64 (d,  $J = 4.2$  Hz, 1H), 7.74 (td,  $J = 7.7, 1.8$  Hz, 1H), 7.65 (d,  $J = 7.9$  Hz, 1H), 7.29 – 7.23 (m, 1H), 6.54 (d,  $J = 6.9$  Hz, 1H), 6.50 – 6.36 (m, 3H), 6.27 (s, 1H),

5.31 (d,  $J = 10.4$  Hz, 1H);  $^{13}\text{C}$  NMR (151 MHz,  $\text{CDCl}_3$ )  $\delta$  156.2, 147.5, 134.9, 130.5, 130.3, 128.8, 127.4, 125.6, 124.8 (q,  $J = 286.1$  Hz), 115.8, 110.4, 100.1, 59.6 (d,  $J = 32.5$  Hz);  $^{19}\text{F}$  NMR (565 MHz,  $\text{CDCl}_3$ )  $\delta$  -71.2; HRMS (ESI)  $m/z$  278.0787 ( $\text{M}+\text{H}^+$ ), calc. for  $\text{C}_{15}\text{H}_{10}\text{F}_3\text{NO}$  278.0786.

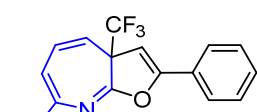

4b

**7-methyl-2-phenyl-3a-(trifluoromethyl)-3aH-furo[2,3-b]azepine**

**(4b):** white solid; Mp 72.9 – 74.6 °C; 15.1 mg, 52% yield;  $^1\text{H}$  NMR (600 MHz,  $\text{CDCl}_3$ )  $\delta$  7.74 – 7.67 (m, 2H), 7.47 – 7.38 (m, 3H), 6.46 (dd,  $J = 9.8, 7.3$  Hz, 1H), 6.01 (d,  $J = 7.2$  Hz, 1H), 5.97 (s, 1H), 5.07

(d,  $J = 9.9$  Hz, 1H), 2.21 (s, 3H);  $^{13}\text{C}$  NMR (151 MHz,  $\text{CDCl}_3$ )  $\delta$  156.0, 145.8, 144.1, 130.4, 130.3, 128.7, 127.5, 125.5, 124.8 (q,  $J = 285.6$  Hz), 112.5, 107.7, 100.1, 58.9 (q,  $J = 32.6$  Hz), 24.6;  $^{19}\text{F}$  NMR (565 MHz,  $\text{CDCl}_3$ )  $\delta$  -72.0; HRMS (ESI)  $m/z$  292.0944 ( $\text{M}+\text{H}^+$ ), calc. for  $\text{C}_{16}\text{H}_{12}\text{F}_3\text{NO}$  292.0946.

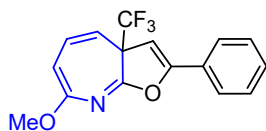

4c

**7-methoxy-2-phenyl-3a-(trifluoromethyl)-3aH-furo[2,3-b] azepine**

**(4c)**: white solid; Mp 83.6 – 84.6 °C; 15.1 mg, 52% yield; <sup>1</sup>H NMR (400 MHz, CDCl<sub>3</sub>) δ 7.83 (d, *J* = 7.2 Hz, 2H), 7.46 (t, *J* = 7.9 Hz, 2H), 7.34 (t, *J* = 7.7 Hz, 2H), 7.07 (d, *J* = 7.4 Hz, 1H), 6.97 (d, *J* = 1.2 Hz, 1H),

6.52 (d, *J* = 8.3 Hz, 1H), 3.19 (s, 3H); <sup>13</sup>C NMR (151 MHz, CD<sub>2</sub>Cl<sub>2</sub>) δ 155.5, 145.0, 143.8, 130.0, 129.9, 128.3, 127.2, 125.0, 124.6 (q, *J* = 285.6 Hz), 111.9, 107.3, 99.8, 58.5 (q, *J* = 32.2 Hz), 23.9; <sup>19</sup>F NMR (565 MHz, CD<sub>2</sub>Cl<sub>2</sub>) δ -72.0; HRMS (ESI) *m/z* 308.0893 (M+H<sup>+</sup>), calc. for C<sub>16</sub>H<sub>12</sub>F<sub>3</sub>NO<sub>2</sub> 308.0894.

**2-phenyl-3a-(trifluoromethyl)-3aH-benzo[*b*]furo[2,3-*e*][1,4]thiazine (4d)**: white solid; Mp

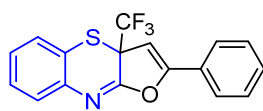

4d

91.3 – 93.2 °C; 25.3 mg, 76% yield; <sup>1</sup>H NMR (400 MHz, CDCl<sub>3</sub>) δ 7.81 – 7.71 (m, 2H), 7.48 (dd, *J* = 5.3, 2.0 Hz, 3H), 7.44 (dd, *J* = 7.9, 1.4 Hz, 1H), 7.39 (dd, *J* = 7.7, 1.4 Hz, 1H), 7.30 (td, *J* = 7.7, 1.5 Hz,

1H), 7.18 (td, *J* = 7.6, 1.4 Hz, 1H), 5.81 (s, 1H); <sup>13</sup>C NMR (101 MHz, CDCl<sub>3</sub>) δ 159.1, 154.6, 140.0, 130.2, 127.9, 126.7, 126.0, 125.8, 125.1, 124.9, 122.8 (q, *J* = 285.9 Hz), 116.0, 93.3, 48.3 (d, *J* = 33.4 Hz); <sup>19</sup>F NMR (376 MHz, CDCl<sub>3</sub>) δ -74.3; HRMS (ESI) *m/z* 334.0508 (M+H<sup>+</sup>), calc. for C<sub>17</sub>H<sub>10</sub>F<sub>3</sub>NOS 334.0508.

**2-phenyl-3a-(trifluoromethyl)-3aH-benzo[*b*]furo[2,3-*e*] [1,4]oxazine (4e)**: white solid; Mp

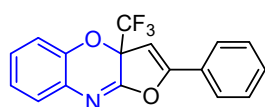

4e

94.5 – 95.1 °C; 24.1 mg, 76% yield; <sup>1</sup>H NMR (600 MHz, CDCl<sub>3</sub>) δ 7.80 – 7.73 (m, 2H), 7.55 – 7.46 (m, 3H), 7.39 (dd, *J* = 8.0, 1.6 Hz, 1H), 7.24 – 7.18 (m, 1H), 7.12 – 7.07 (m, 2H), 5.96 (s, 1H). <sup>13</sup>C NMR

(151 MHz, CDCl<sub>3</sub>) δ 162.1, 156.9, 142.8, 131.6, 131.5, 128.9, 128.6, 127.0, 126.7, 126.1, 123.6, 122.5 (q, *J* = 291.6 Hz), 115.7, 94.2, 78.0 (d, *J* = 33.6 Hz); <sup>19</sup>F NMR (565 MHz, CDCl<sub>3</sub>) δ -77.5; HRMS (ESI) *m/z* 318.0737 (M+H<sup>+</sup>), calc. for C<sub>17</sub>H<sub>10</sub>F<sub>3</sub>NO<sub>2</sub> 318.0740.

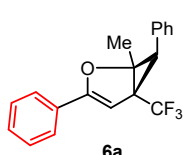

6a

**1-methyl-3,6-diphenyl-5-(trifluoromethyl)-2-oxabicyclo[3.1.0]hex-3-ene**

**(6a)**: white solid; Mp 117.6 – 119.6 °C; 27.2 mg, 86% yield; <sup>1</sup>H NMR (600 MHz, CDCl<sub>3</sub>) δ 7.32 (dd, *J* = 6.4, 2.8 Hz, 2H), 7.28 (d, *J* = 7.6 Hz,

2H), 7.25 – 7.22 (m, 3H), 7.20 (t, *J* = 7.6 Hz, 2H), 7.13 (t, *J* = 7.3 Hz, 1H), 5.48 (s, 1H), 2.64 (s, 1H), 1.98 (s, 3H); <sup>13</sup>C NMR (151 MHz, CDCl<sub>3</sub>) δ 157.2, 132.1, 130.3, 129.3, 128.8, 128.1, 128.0, 126.9, 125.0, 124.7 (q, *J* = 272.5 Hz), 94.7, 73.2, 44.0 (q, *J* = 37.1 Hz), 25.8, 17.3; <sup>19</sup>F NMR (565 MHz, CDCl<sub>3</sub>) δ -65.3; HRMS (ESI) *m/z* 317.1148 (M+H<sup>+</sup>), calc. for C<sub>19</sub>H<sub>15</sub>F<sub>3</sub>O

317.1149.

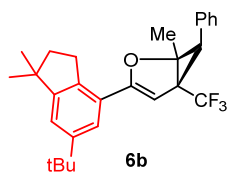

**3-(6-(*tert*-butyl)-1,1-dimethyl-2,3-dihydro-1*H*-inden-4-yl)-1-methyl-6-phenyl-5-(trifluoromethyl)-2-oxabicyclo[3.1.0]hex-3-ene (6b):**

white solid; Mp 108.7 – 110.5°C; 38.7 mg, 88% yield; <sup>1</sup>H NMR (600 MHz, CDCl<sub>3</sub>) δ 7.29 (dq, *J* = 7.0, 1.1 Hz, 2H), 7.21 (t, *J* = 7.5 Hz, 2H), 7.14 (t, *J* = 7.4 Hz, 1H), 7.06 – 7.03 (m, 2H), 5.24 (s, 1H), 2.72 (ddd, *J* = 15.9, 8.0, 6.3 Hz, 1H), 2.60 – 2.52 (m, 2H), 1.94 (s, 3H), 1.81 (h, *J* = 5.7 Hz, 2H), 1.27 (s, 9H), 1.19 (s, 6H); <sup>13</sup>C NMR (151 MHz, CDCl<sub>3</sub>) δ 157.4, 152.8, 149.4, 137.5, 132.3, 130.57, 128.0, 126.9, 124.8 (q, *J* = 273.2 Hz), 121.6, 119.3, 96.8, 72.7, 44.1 (d, *J* = 36.9 Hz), 43.8, 41.3, 34.6, 31.4, 29.7, 28.7, 28.6, 25.5, 17.3; <sup>19</sup>F NMR (565 MHz, CDCl<sub>3</sub>) δ -65.3; HRMS (ESI) *m/z* 441.2400 (M+H<sup>+</sup>), calc. for C<sub>28</sub>H<sub>31</sub>F<sub>3</sub>O 441.2395.

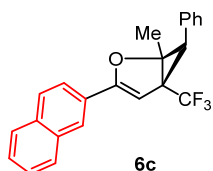

**1-methyl-3-(naphthalen-1-yl)-6-phenyl-5-(trifluoromethyl)-2-oxabicyclo[3.1.0]hex-3-ene (6c):** white solid; Mp 80.4 – 81.4°C 29.3 mg,

80% yield; <sup>1</sup>H NMR (600 MHz, CDCl<sub>3</sub>) δ 7.82 (s, 1H), 7.80 – 7.77 (m, 1H), 7.76 – 7.71 (m, 1H), 7.66 (d, *J* = 8.6 Hz, 1H), 7.47 – 7.42 (m, 2H), 7.35 (dd, *J* = 8.6, 1.6 Hz, 1H), 7.29 (d, *J* = 7.8 Hz, 2H), 7.15 (t, *J* = 7.7 Hz, 2H), 7.07 (t, *J* = 7.4 Hz, 1H), 5.59 (s, 1H), 2.66 (s, 1H), 2.01 (s, 3H); <sup>13</sup>C NMR (151 MHz, CDCl<sub>3</sub>) δ 157.1, 133.3, 132.9, 132.1, 130.3, 128.3, 128.0, 127.8, 127.6, 126.9, 126.5, 126.4, 126.3, 124.0, 124.7 (q, *J* = 272.5 Hz), 122.7, 95.4, 73.3, 44.1 (q, *J* = 37.1 Hz), 26.1, 17.3; <sup>19</sup>F NMR (565 MHz, CDCl<sub>3</sub>) δ -65.2 HRMS (ESI) *m/z* 367.1304 (M+H<sup>+</sup>), calc. for C<sub>23</sub>H<sub>17</sub>F<sub>3</sub>O 367.1308.

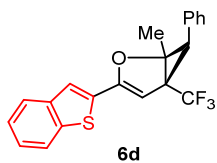

**3-(benzo[*b*]thiophen-2-yl)-1-methyl-6-phenyl-5-(trifluoromethyl)-2-oxabicyclo[3.1.0]hex-3-ene (6d):** yellow solid; Mp 83.5 – 85.2 °C; 33.5

mg, 90% yield; <sup>1</sup>H NMR (600 MHz, CDCl<sub>3</sub>) δ 7.80 – 7.75 (m, 1H), 7.73 – 7.69 (m, 1H), 7.36 – 7.27 (m, 5H), 7.19 (dd, *J* = 8.4, 6.9 Hz, 2H), 7.13 – 7.09 (m, 1H), 5.51 (s, 1H), 2.66 (s, 1H), 1.99 (s, 3H); <sup>13</sup>C NMR (151 MHz, CDCl<sub>3</sub>) δ 152.6, 140.1, 136.0, 132.0, 130.4, 128.1, 127.0, 125.9, 125.7, 124.7 (q, *J* = 271.8 Hz), 124.5, 122.9, 122.6, 96.3, 72.6, 43.8 (q, *J* = 37.0 Hz), 25.7, 17.3; <sup>19</sup>F NMR (565 MHz, CDCl<sub>3</sub>) δ -65.2; HRMS (ESI) *m/z* 378.0868 (M+H<sup>+</sup>), calc. for C<sub>18</sub>H<sub>14</sub>F<sub>3</sub>NO 378.0869.

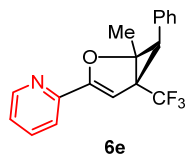

**2-(1-methyl-6-phenyl-5-(trifluoromethyl)-2-oxabicyclo[3.1.0]hex-3-en-3-**

**yl)pyridine (6e):** white solid; Mp 108.7 – 110.5 °C; 26.3 mg, 83% yield; <sup>1</sup>H

NMR (600 MHz, CDCl<sub>3</sub>) δ 8.45 (d, *J* = 4.7 Hz, 1H), 7.54 (td, *J* = 7.8, 1.7 Hz, 1H), 7.28 (dd, *J* = 5.6, 4.7 Hz, 2H), 7.16 (t, *J* = 7.6 Hz, 2H), 7.09 (ddd, *J* = 7.7, 4.6, 3.5 Hz, 2H), 5.96 (s, 1H), 2.67 (s, 1H), 1.98 (s, 3H); <sup>13</sup>C NMR (151 MHz, CDCl<sub>3</sub>) δ 156.2, 149.3, 147.8, 136.2, 131.7, 130.2, 128.0, 126.9, 124.5 (q, *J* = 272.6 Hz), 123.2, 119.4, 98.7, 73.9, 44.0 (q, *J* = 37.1 Hz), 25.9, 17.3; <sup>19</sup>F NMR (565 MHz, CDCl<sub>3</sub>) δ -65.2; HRMS (ESI) *m/z* 318.1100 (M+H<sup>+</sup>), calc. for C<sub>18</sub>H<sub>14</sub>F<sub>3</sub>NO 318.1099.

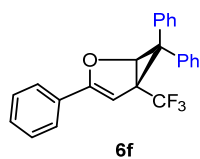

**3,6,6-triphenyl-5-(trifluoromethyl)-2-oxabicyclo[3.1.0]hex-3-ene (6f):**

yellow solid; Mp 110.9 – 111.9 °C 34.8 mg, 92% yield; <sup>1</sup>H NMR (600 MHz,

CDCl<sub>3</sub>) δ 7.60 (d, *J* = 7.4 Hz, 2H), 7.42 (dd, *J* = 8.1, 1.0 Hz, 2H), 7.31 (t, *J* = 7.7 Hz, 2H), 7.27 – 7.24 (m, 2H), 7.21 (t, *J* = 6.6 Hz, 4H), 7.15 (t, *J* = 7.8 Hz, 2H), 7.03 – 6.99 (m, 1H), 5.62 (s, 1H), 5.62 (s, 1H); <sup>13</sup>C NMR (151 MHz, CDCl<sub>3</sub>) δ 158.7, 138.2, 137.1, 130.1, 129.1, 130.0, 129.0, 128.7, 128.2, 128.1, 127.3, 126.7, 125.1, 124.5 (q, *J* = 273.6 Hz), 97.6, 69.1, 47.3 (q, *J* = 36.7 Hz); 38.1; <sup>19</sup>F NMR (565 MHz, CDCl<sub>3</sub>) δ -60.4; HRMS (ESI) *m/z* 379.1304 (M+H<sup>+</sup>), calc. for C<sub>24</sub>H<sub>17</sub>F<sub>3</sub>O 379.1310.

## 11. Copies of NMR spectra

 $^1\text{H}$  NMR (600 MHz,  $\text{CDCl}_3$ ) of compound (*E*)-1a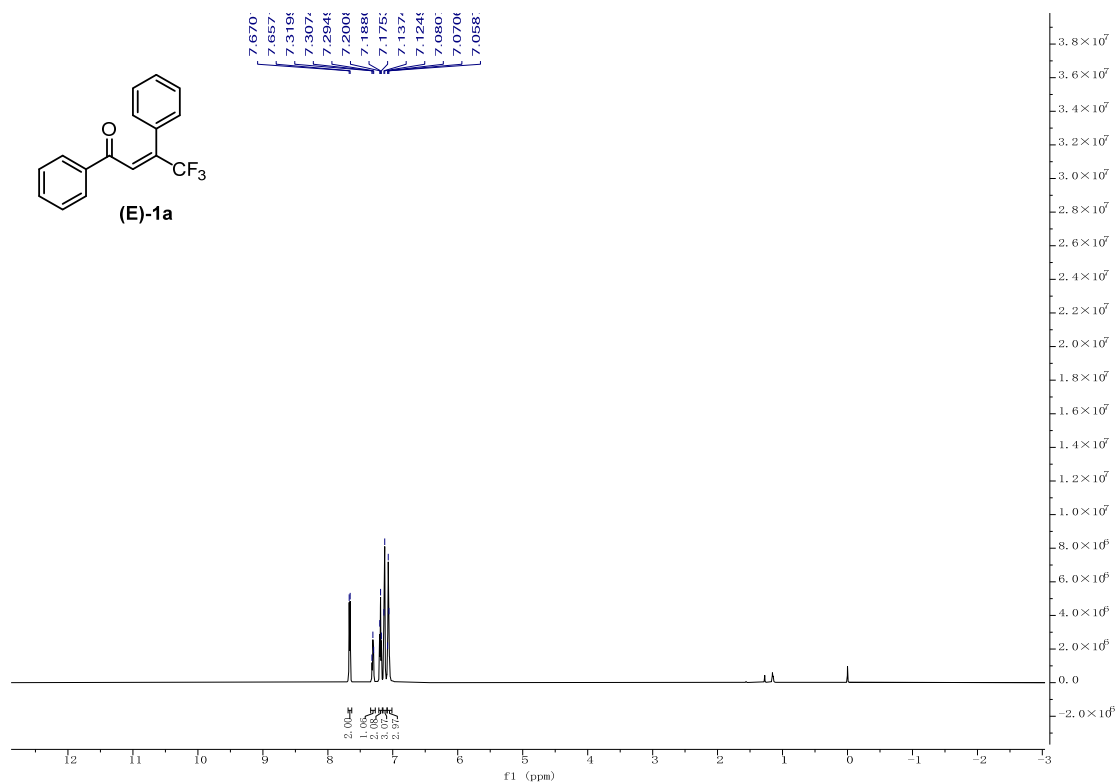 $^{13}\text{C}$  NMR (151 MHz,  $\text{CDCl}_3$ ) of compound (*E*)-1a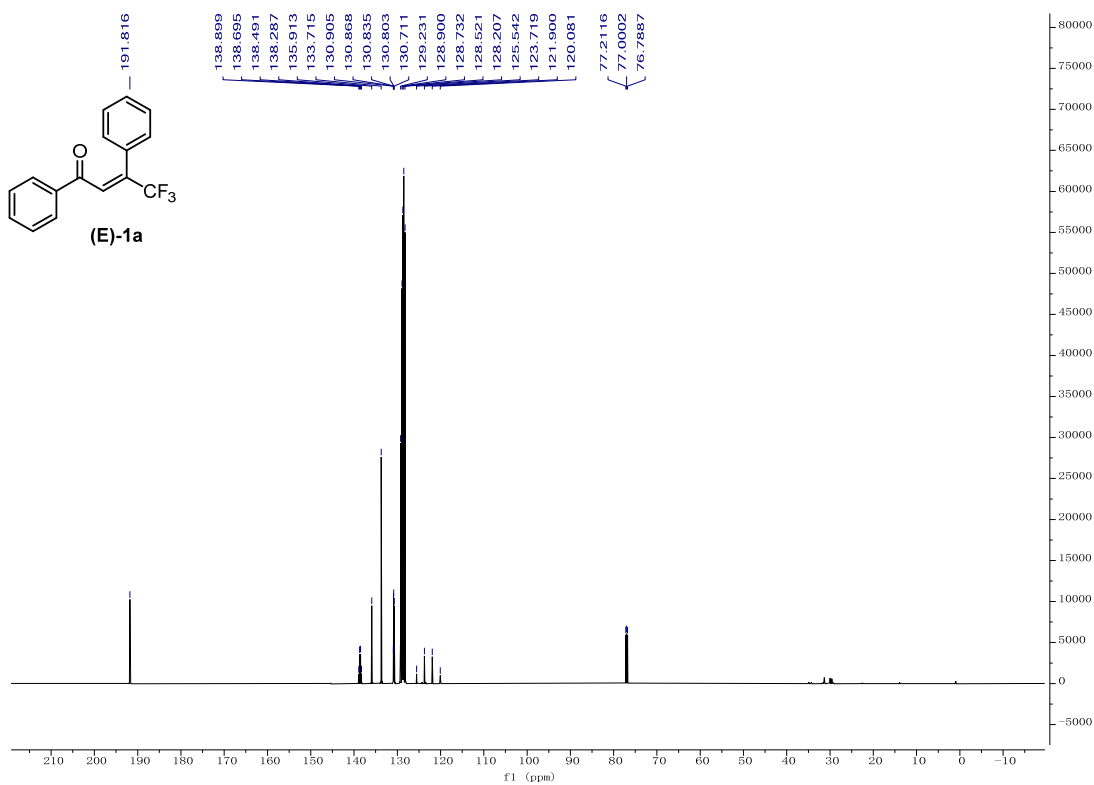



$^{19}\text{F}$  NMR (565 MHz,  $\text{CDCl}_3$ ) of compound (*E*)-**1a**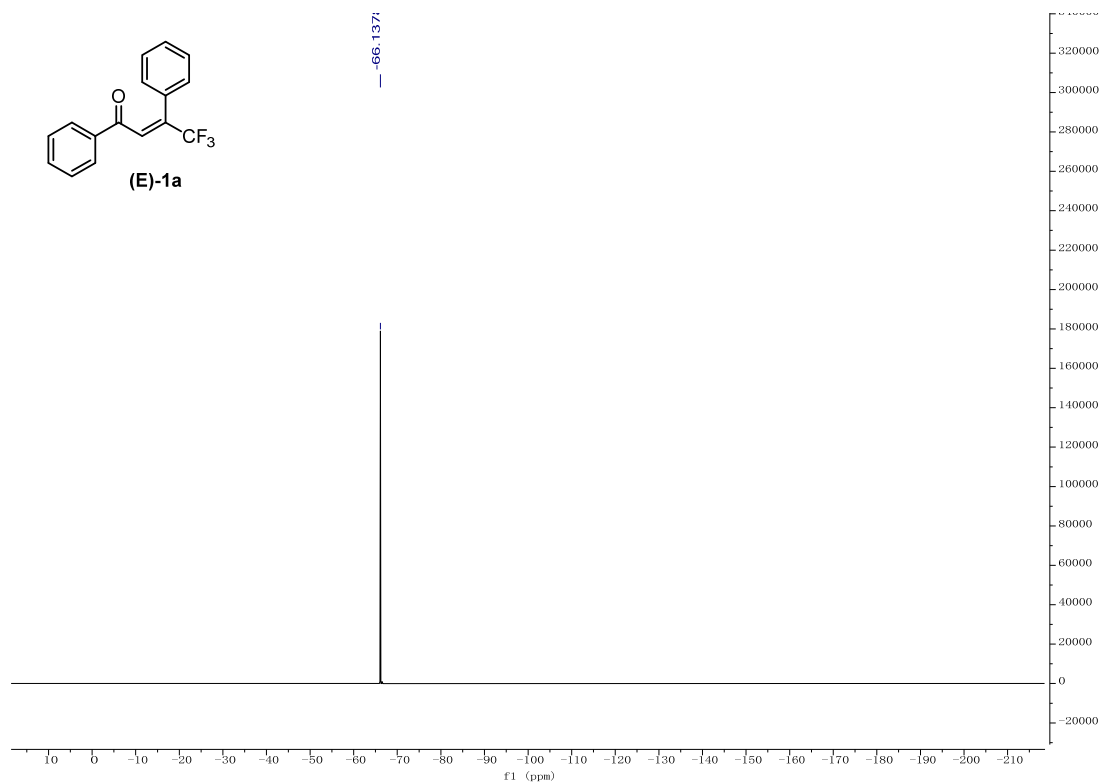 $^1\text{H}$  NMR (300 MHz,  $\text{CDCl}_3$ ) of compound (*Z*)-**1a**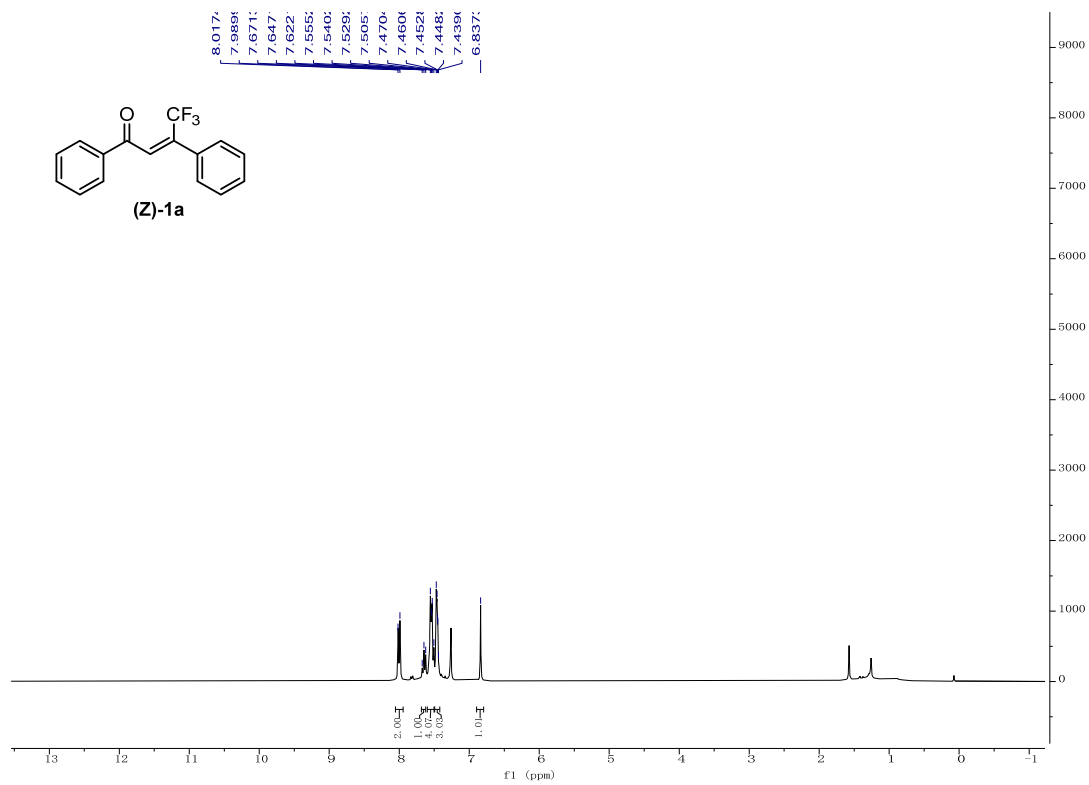

$^{13}\text{C}$  NMR (75 MHz,  $\text{CDCl}_3$ ) of compound (Z)-1a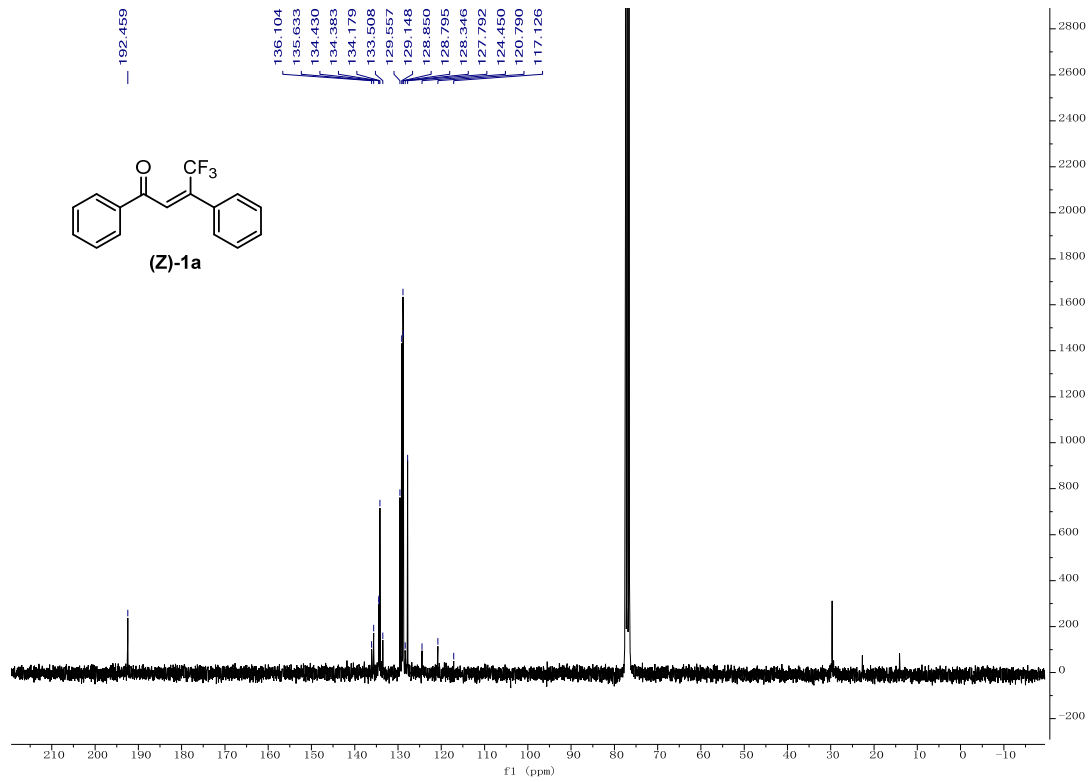 $^{19}\text{F}$  NMR (376 MHz,  $\text{CDCl}_3$ ) of compound (Z)-1a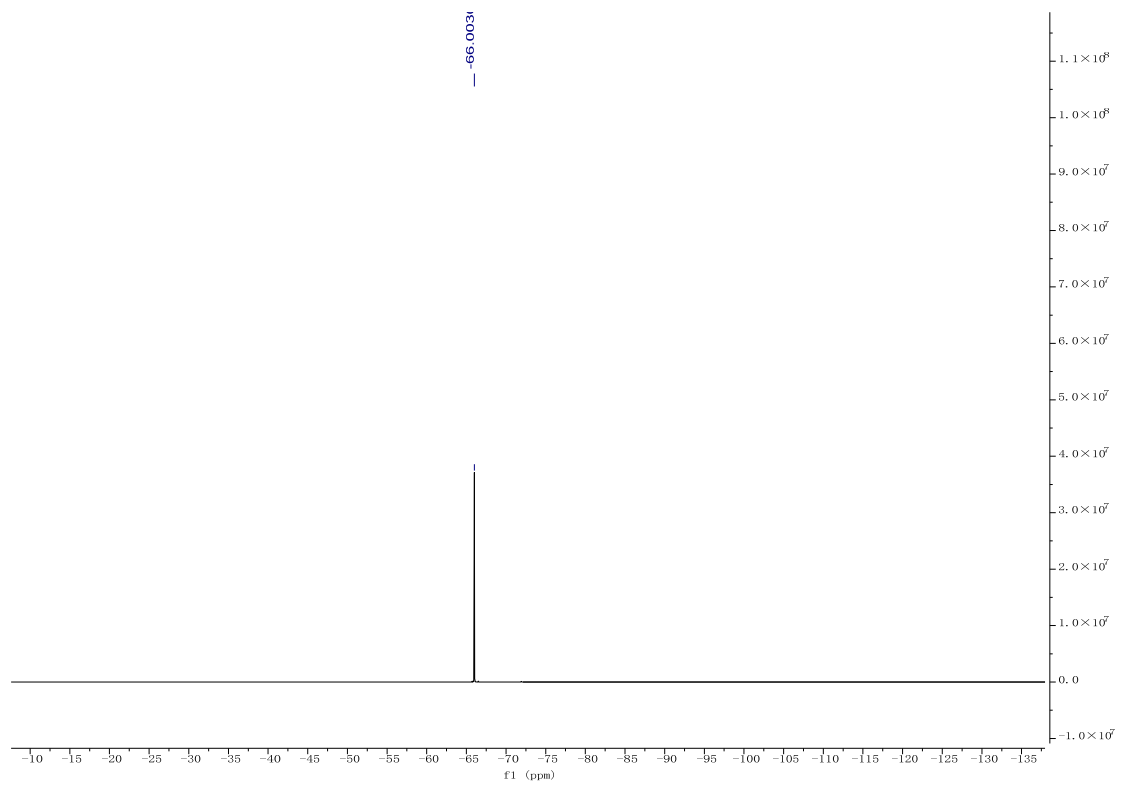

$^1\text{H}$  NMR (300 MHz,  $\text{CDCl}_3$ ) of compound **1b**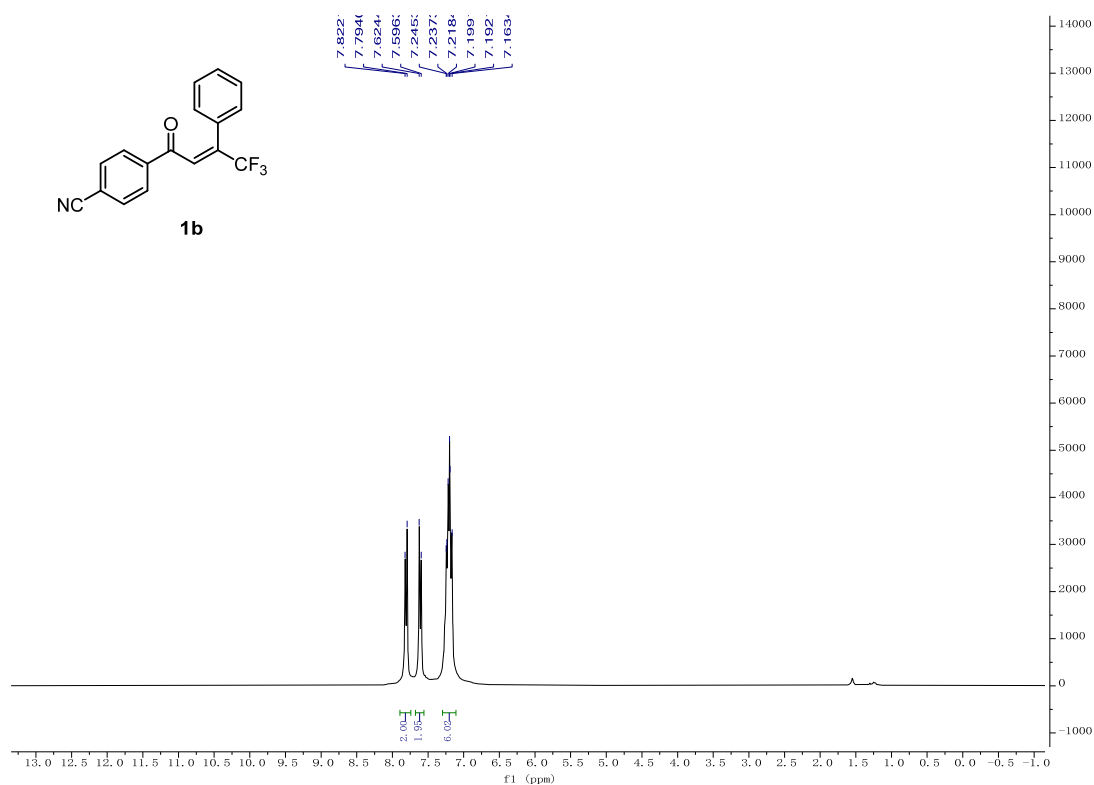 $^{13}\text{C}$  NMR (75 MHz,  $\text{CDCl}_3$ ) of compound **1b**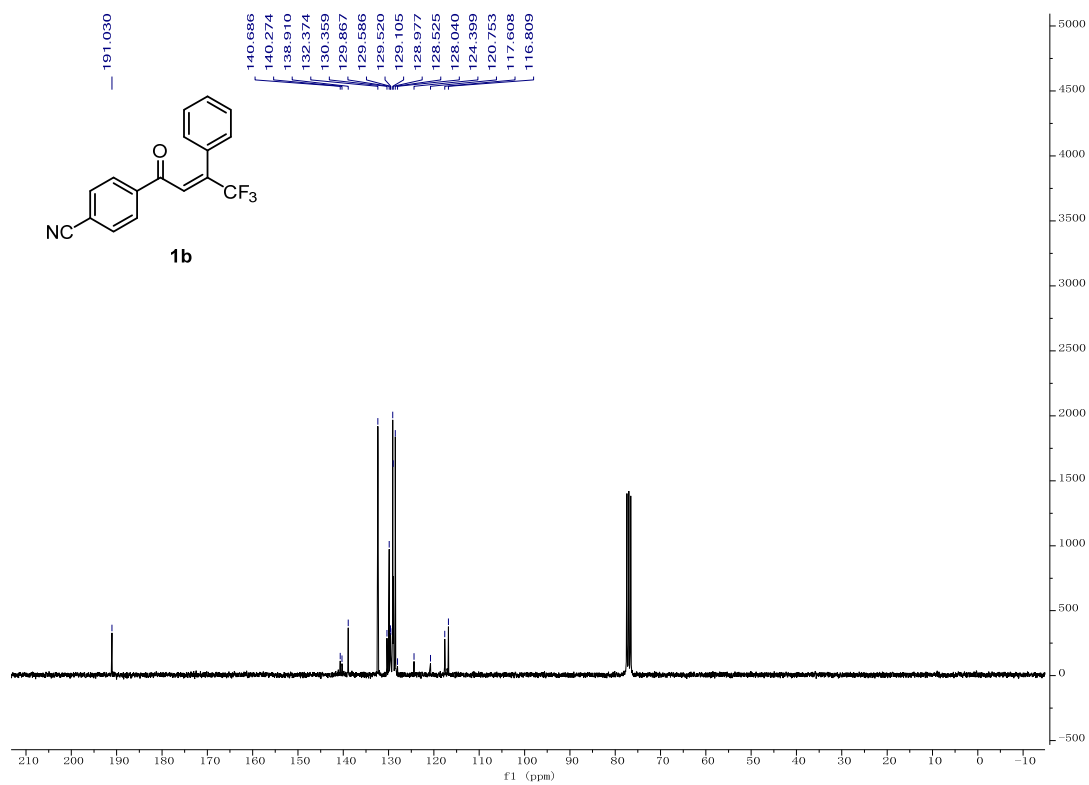

$^{19}\text{F}$  NMR (376 MHz,  $\text{CDCl}_3$ ) of compound **2b**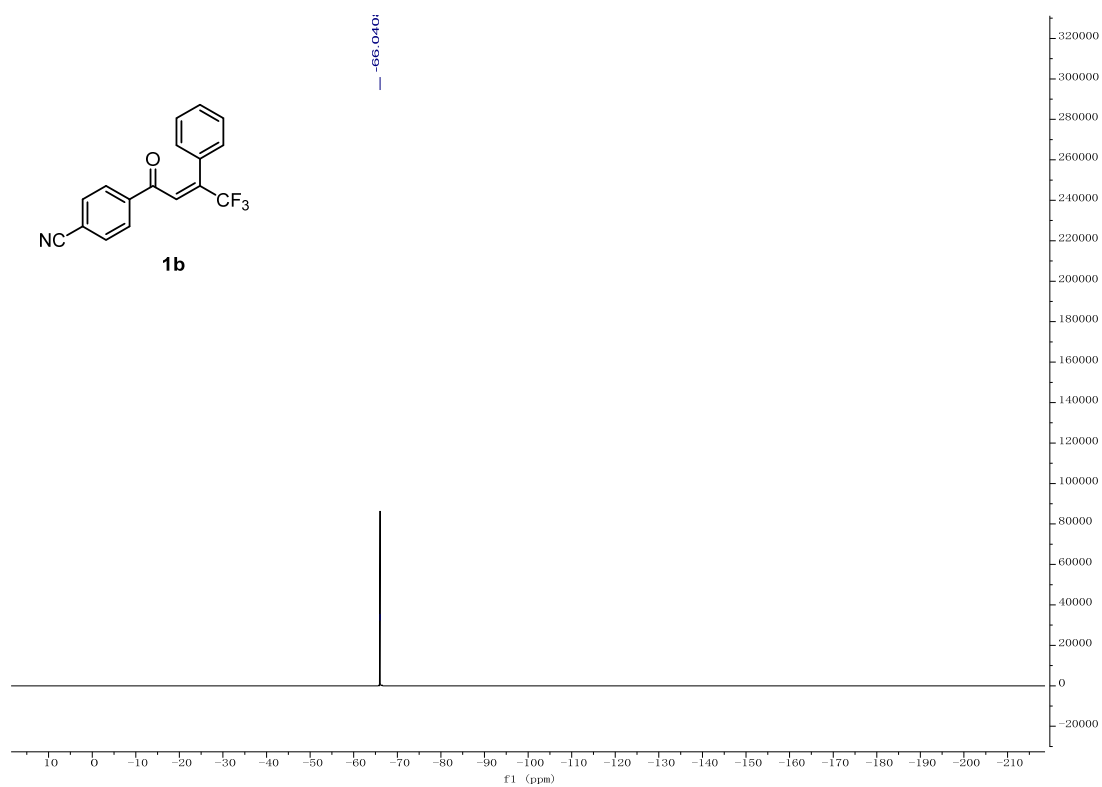 $^1\text{H}$  NMR (300 MHz,  $\text{CDCl}_3$ ) of compound **1f**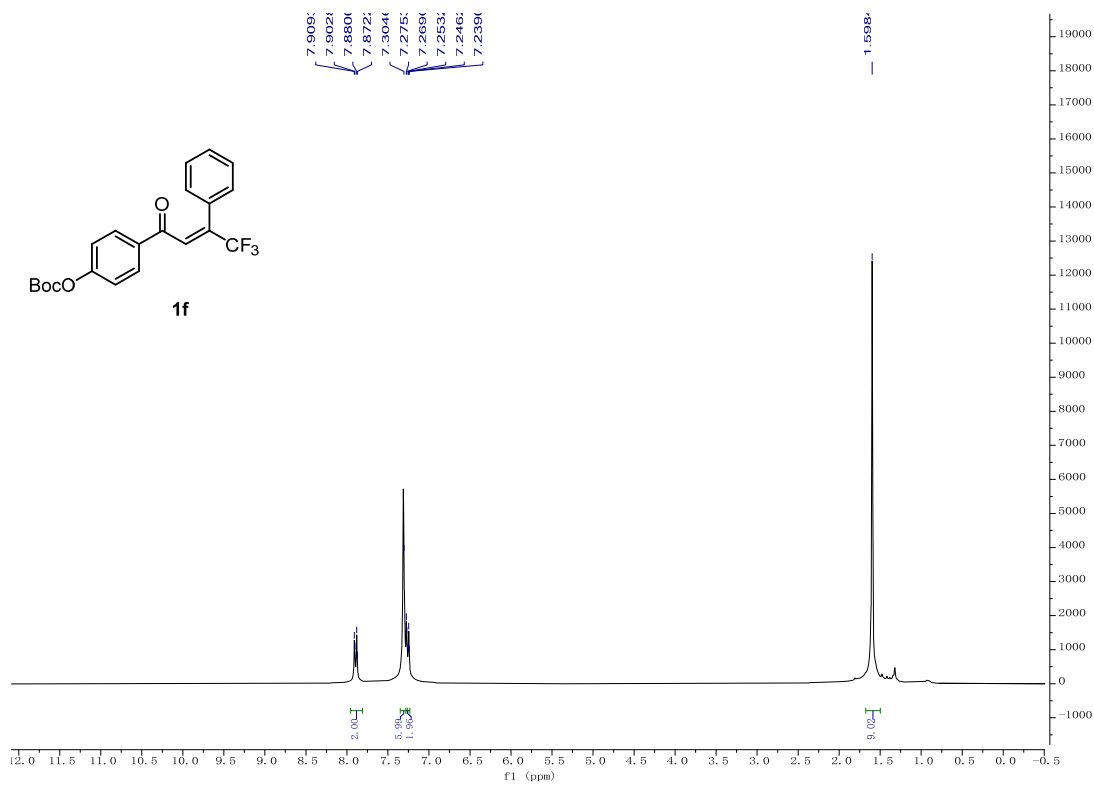

$^{13}\text{C}$  NMR (75 MHz,  $\text{CDCl}_3$ ) of compound **1f**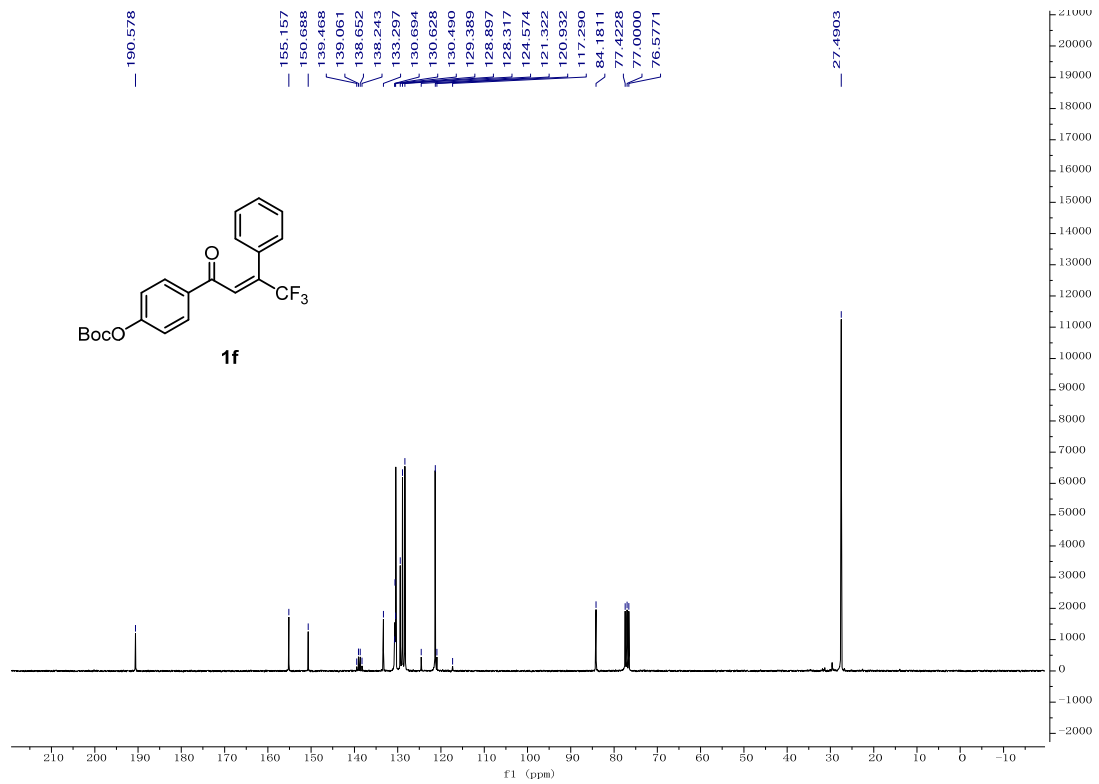 $^{19}\text{F}$  NMR (376 MHz,  $\text{CDCl}_3$ ) of compound **1f**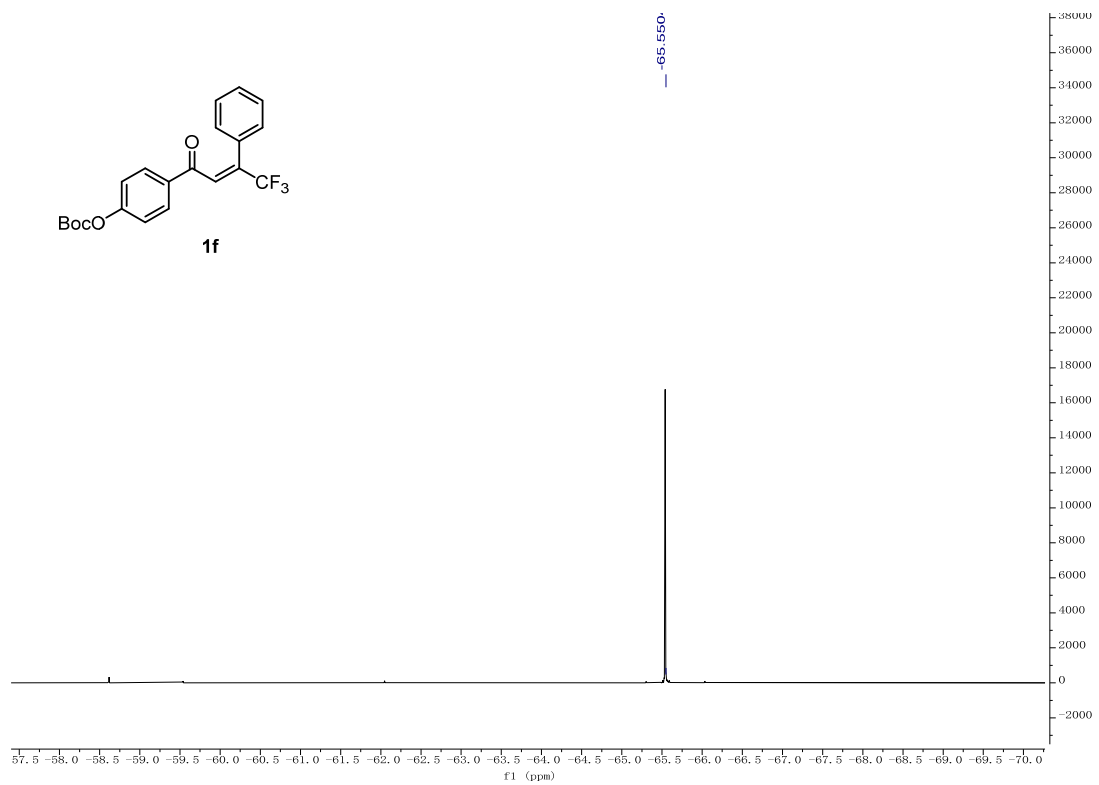

$^1\text{H}$  NMR (300 MHz,  $\text{CDCl}_3$ ) of compound **1g**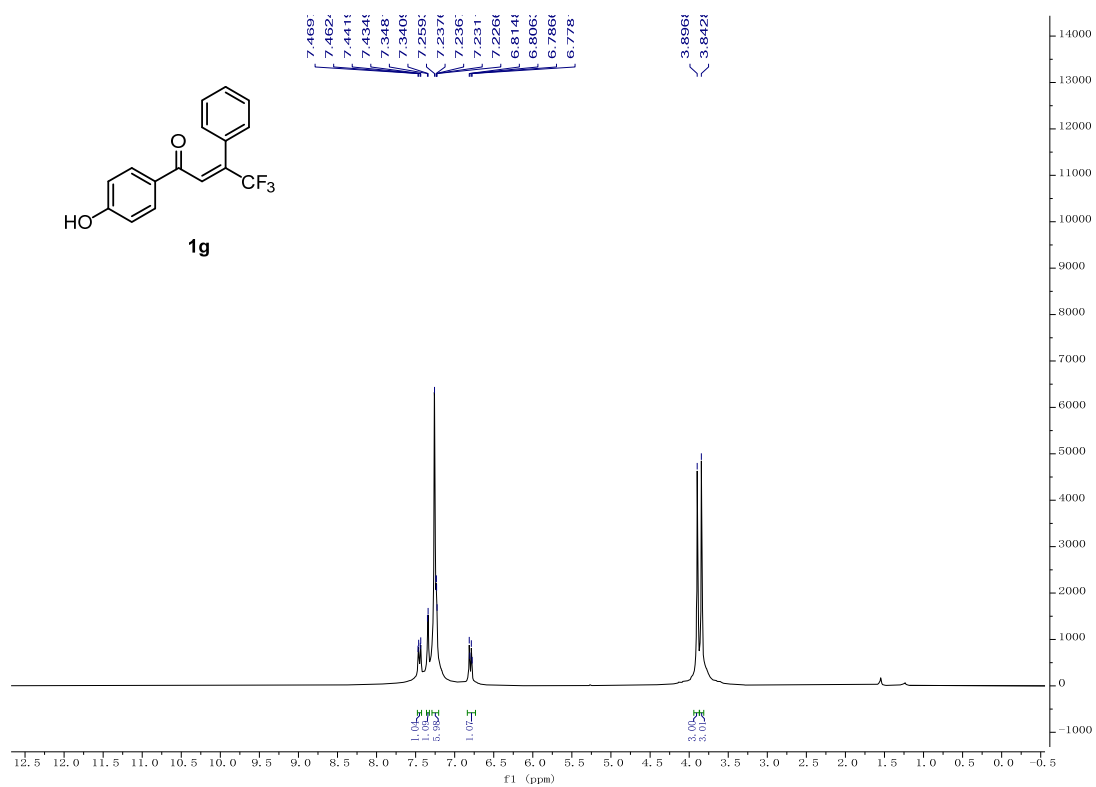 $^{13}\text{C}$  NMR (75 MHz,  $\text{CDCl}_3$ ) of compound **1g**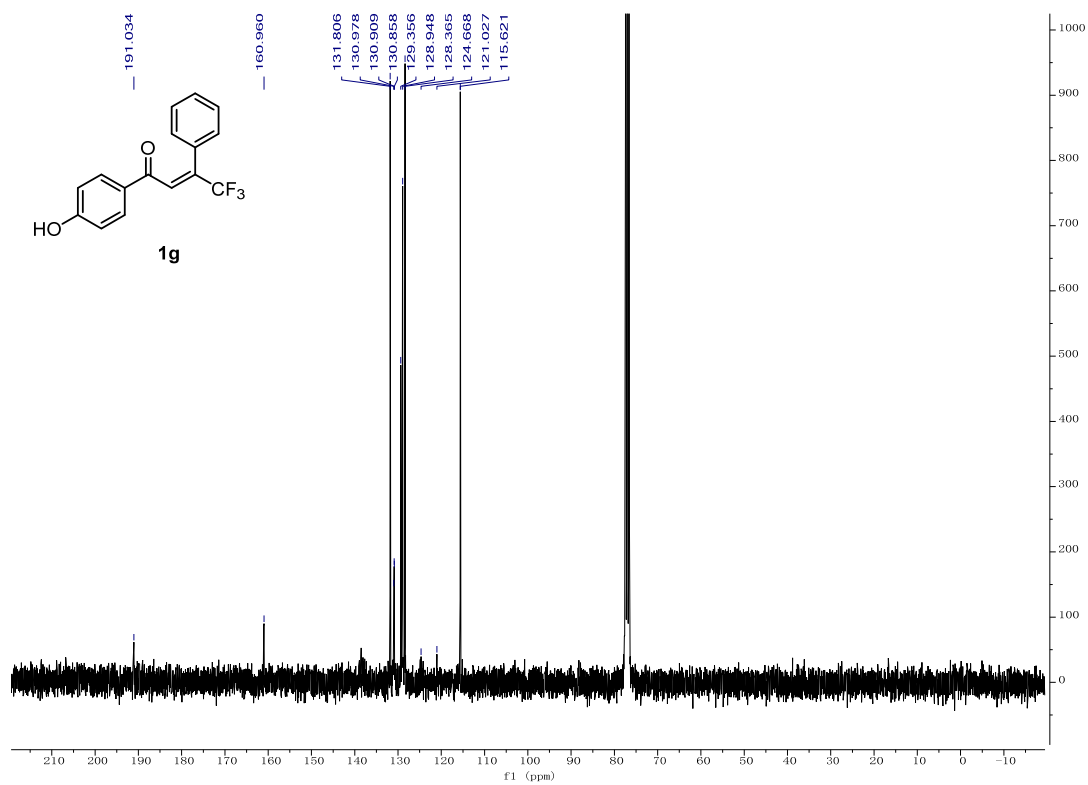

$^{19}\text{F}$  NMR (376 MHz,  $\text{CDCl}_3$ ) of compound **1g**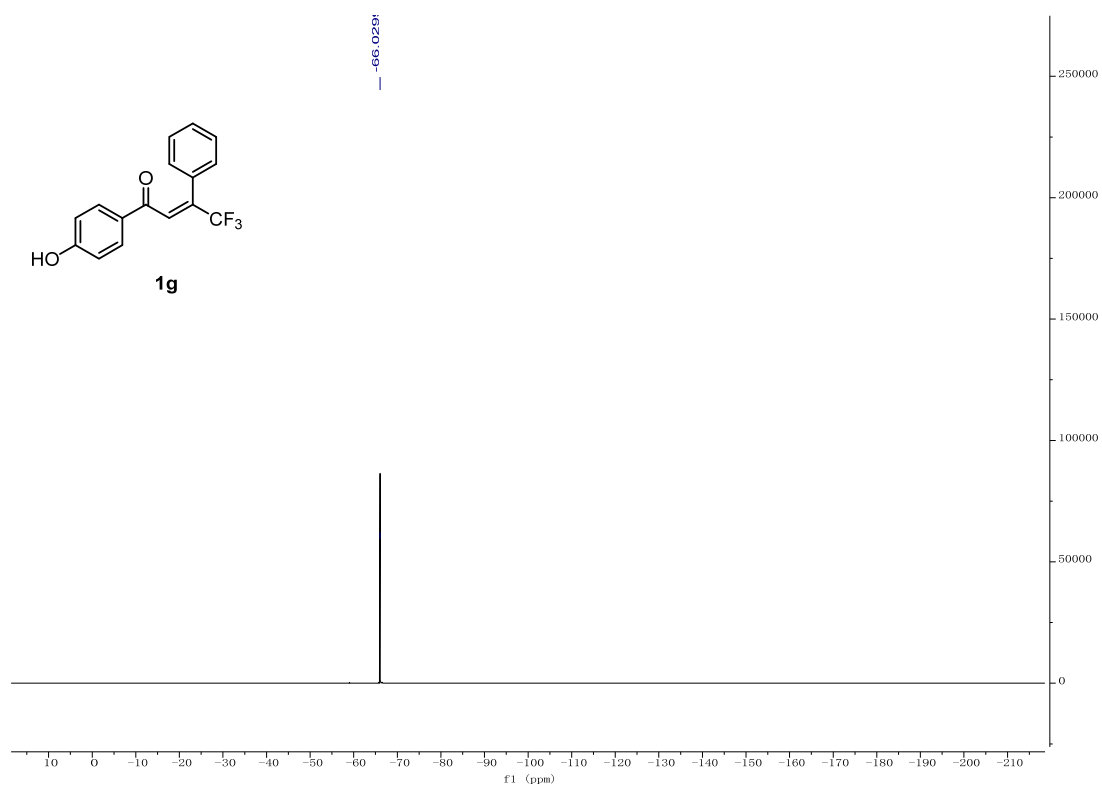 $^1\text{H}$  NMR (300 MHz,  $\text{CDCl}_3$ ) of compound **1h**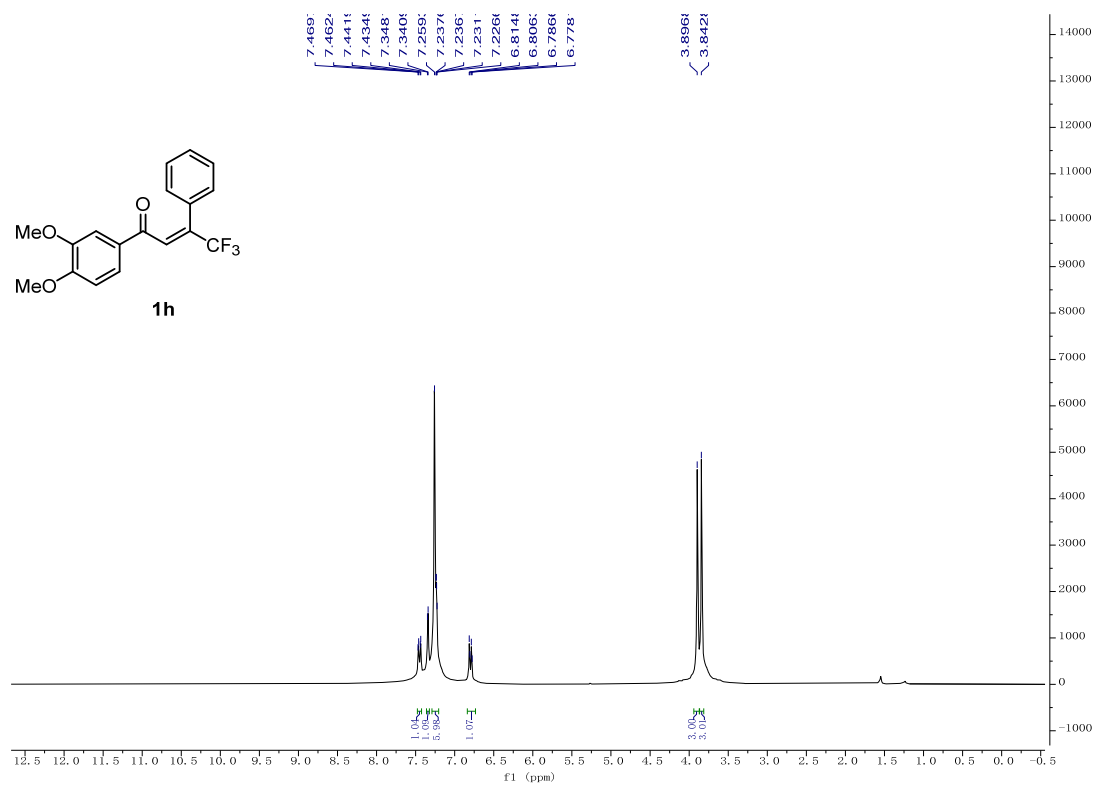

$^{13}\text{C}$  NMR (75 MHz,  $\text{CDCl}_3$ ) of compound **1h**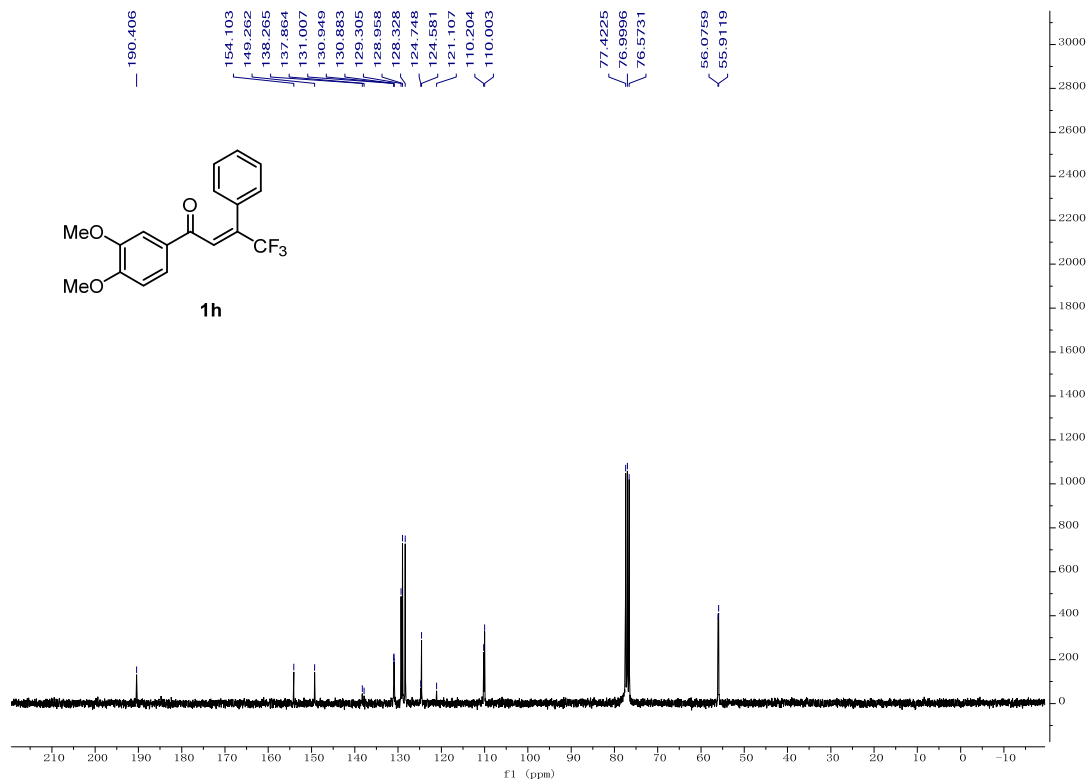 $^{19}\text{F}$  NMR (376 MHz,  $\text{CDCl}_3$ ) of compound **1h**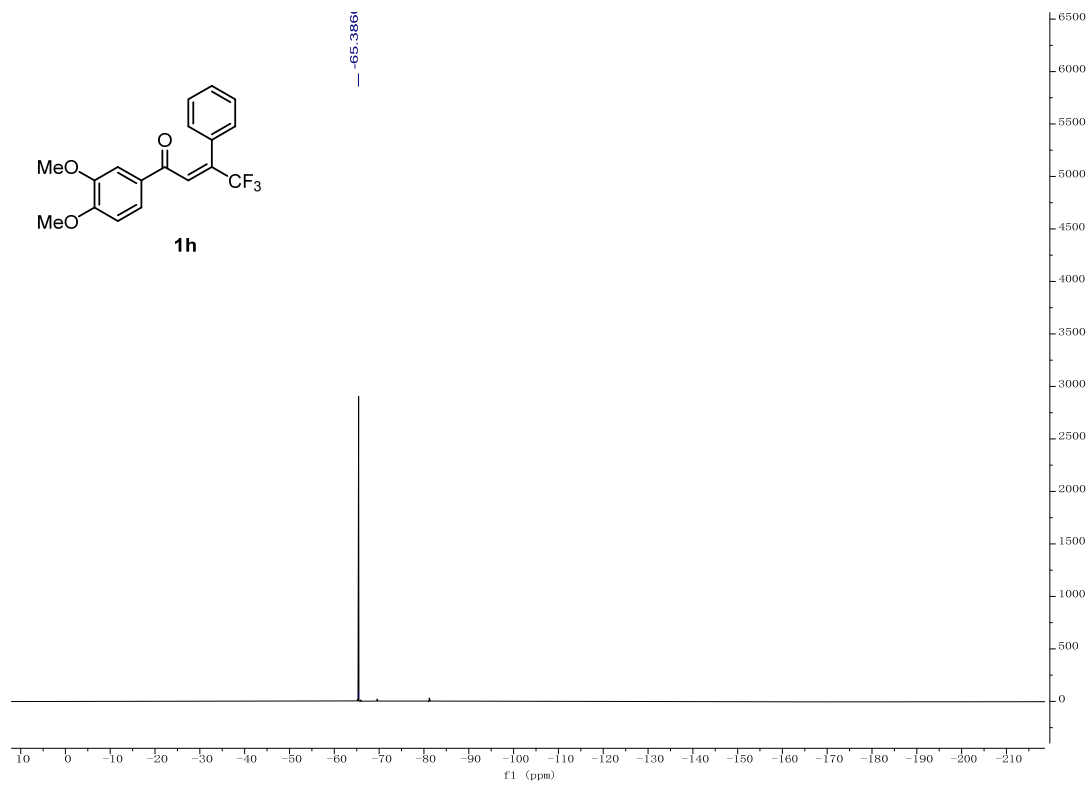



<sup>1</sup>H NMR (300 MHz, CDCl<sub>3</sub>) of compound **1i**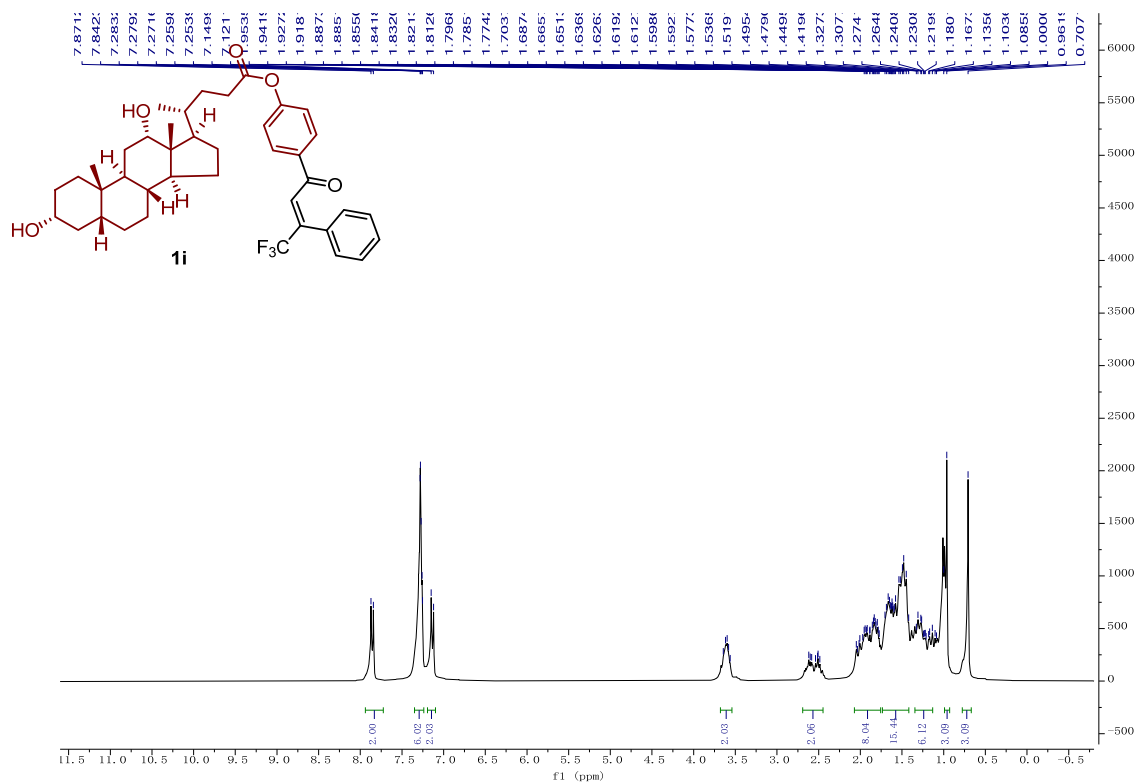<sup>13</sup>C NMR (75 MHz, CDCl<sub>3</sub>) of compound **1i**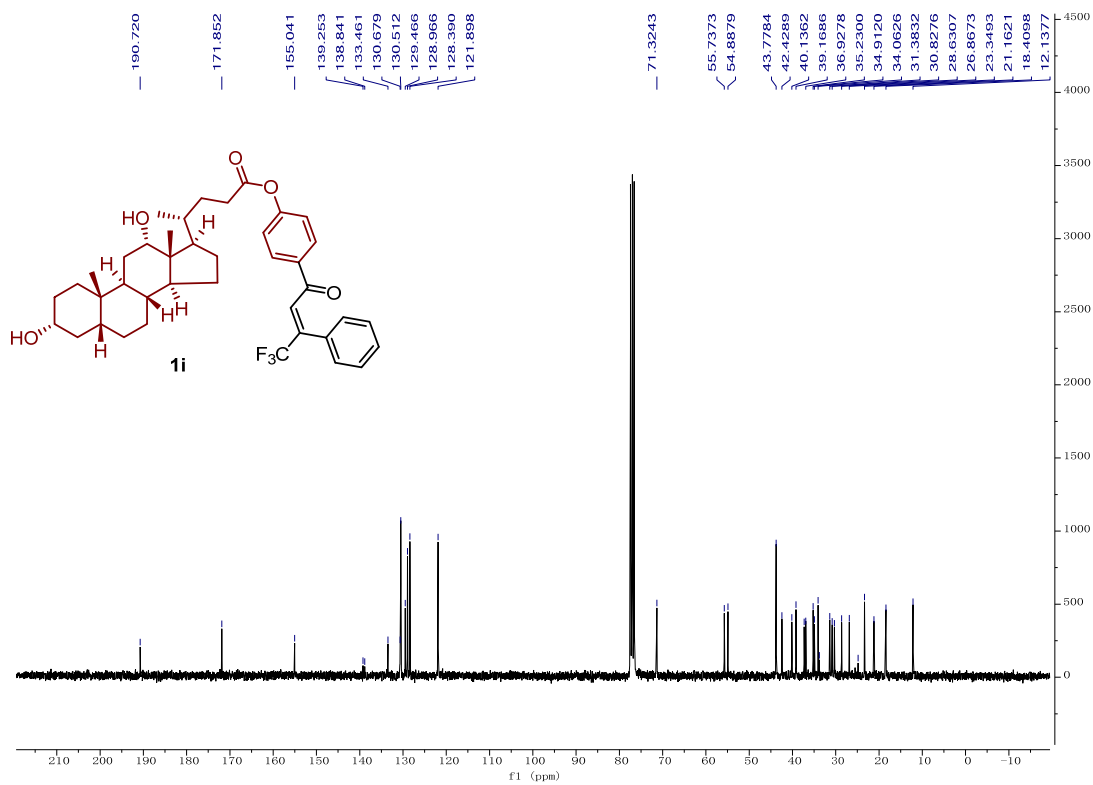

$^{19}\text{F}$  NMR (376 MHz,  $\text{CDCl}_3$ ) of compound **1i**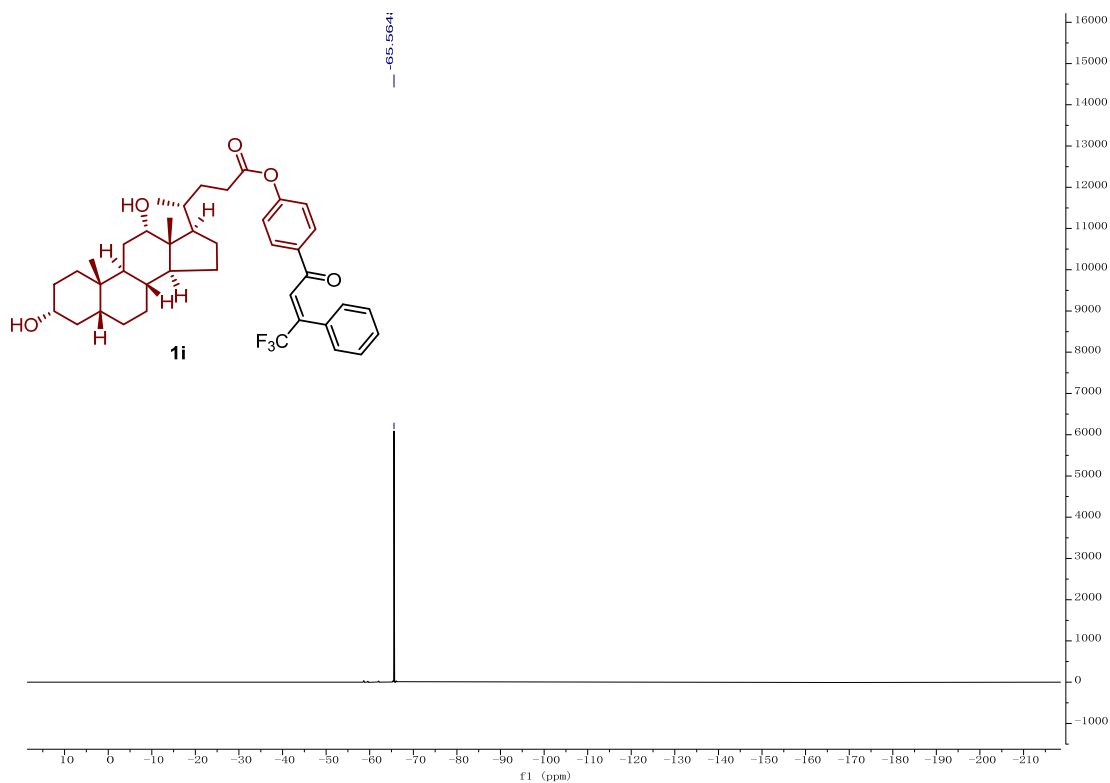 $^1\text{H}$  NMR (300 MHz,  $\text{CDCl}_3$ ) of compound **1j**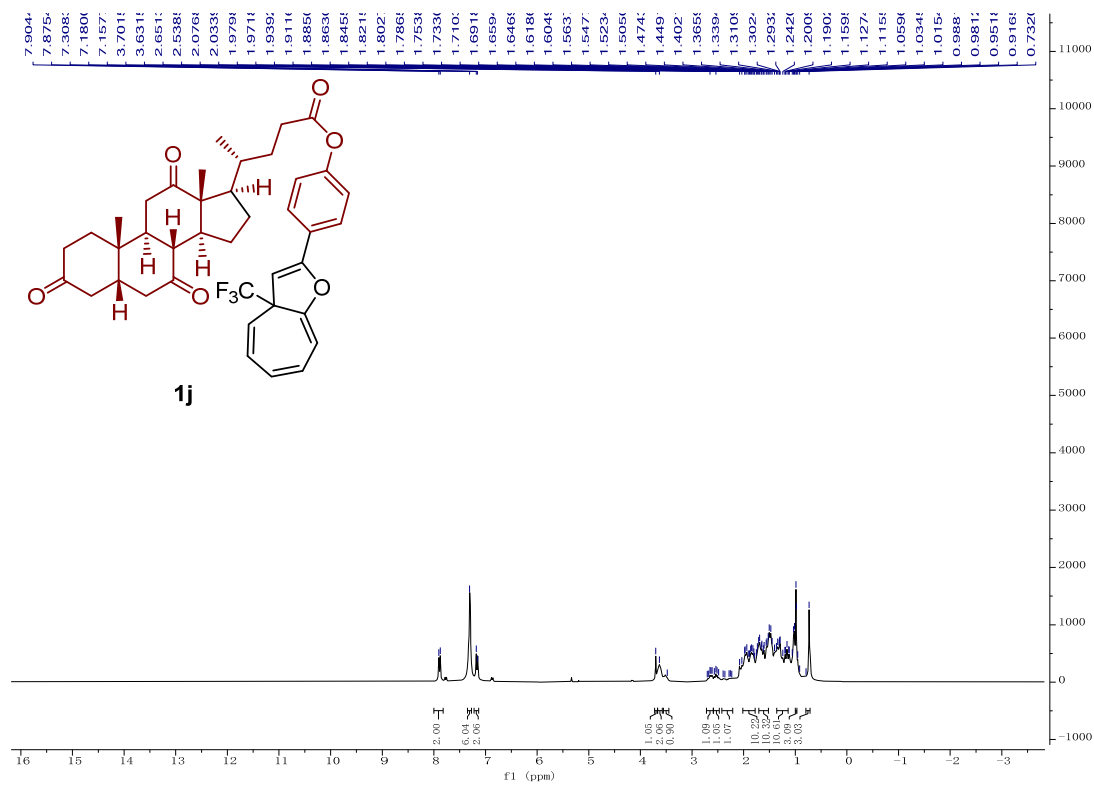

$^{13}\text{C}$  NMR (75 MHz, DMSO) of compound **1j**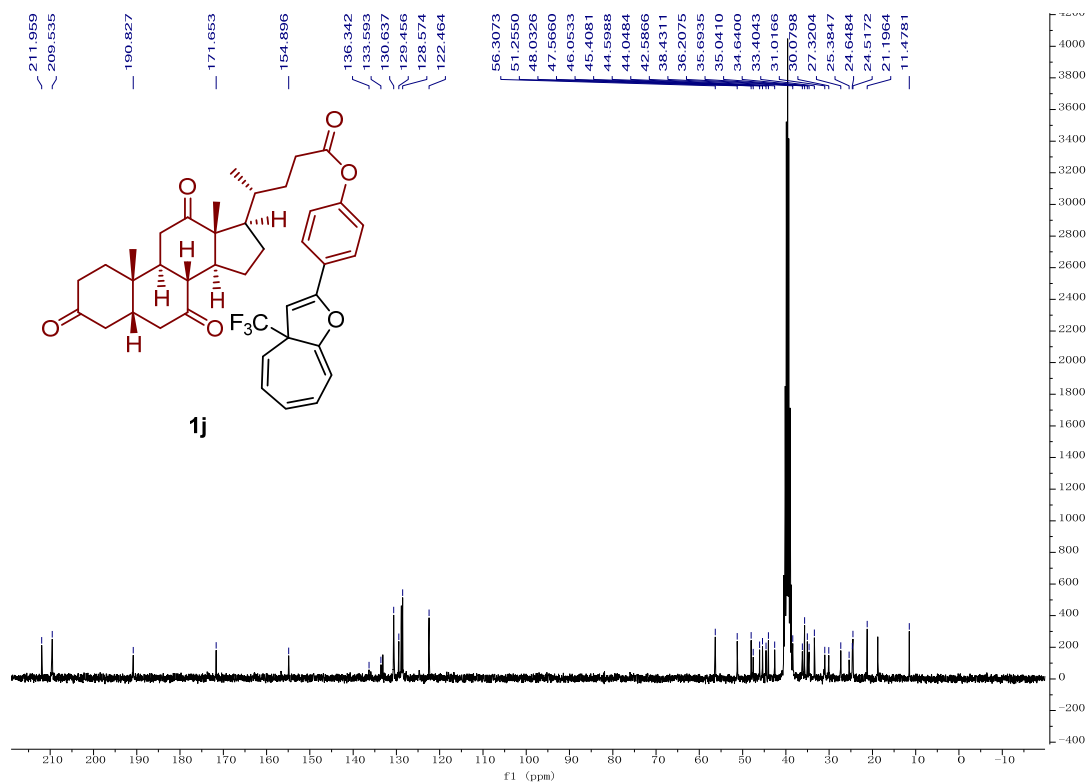 $^{19}\text{F}$  NMR (376 MHz,  $\text{CDCl}_3$ ) of compound **1j**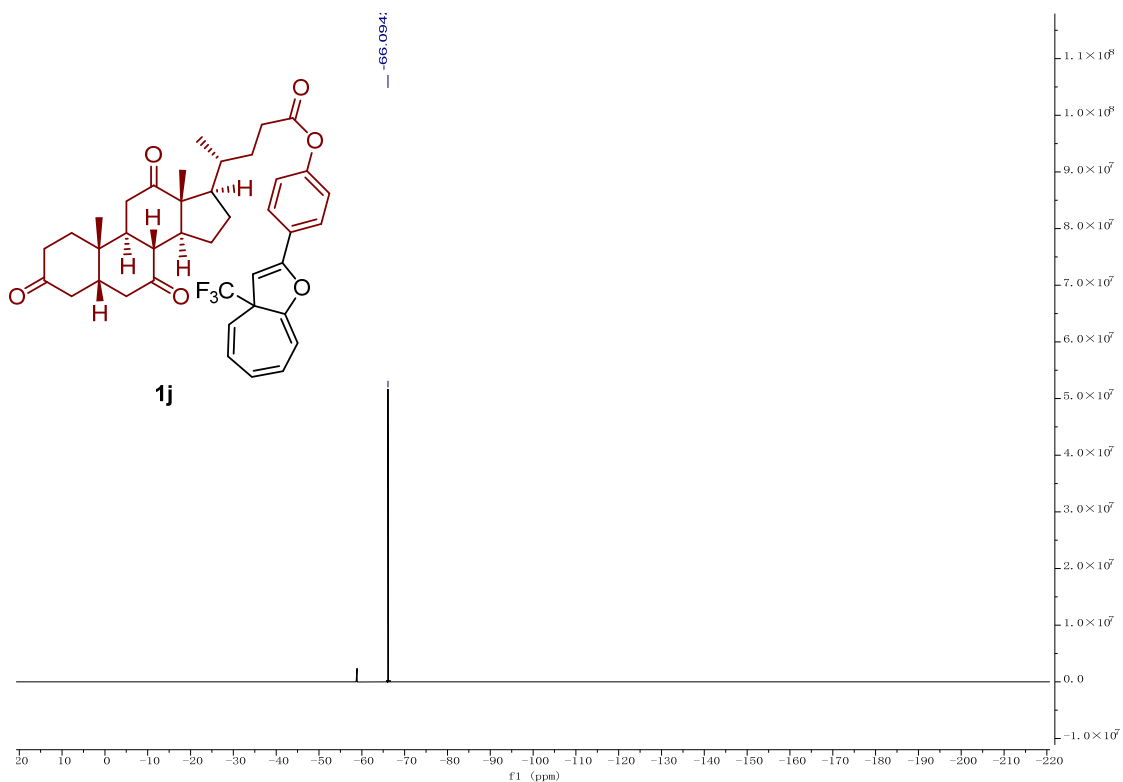

$^1\text{H}$  NMR (300 MHz,  $\text{CDCl}_3$ ) of compound **1k**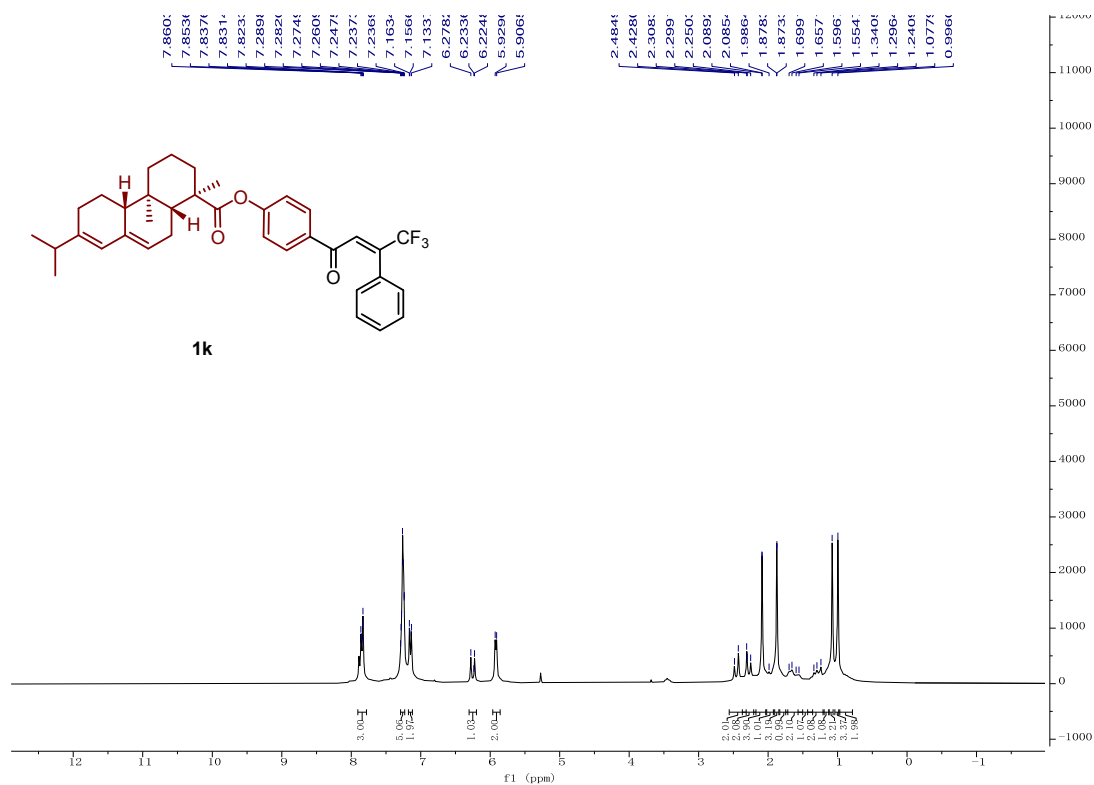 $^{13}\text{C}$  NMR (75 MHz,  $\text{CDCl}_3$ ) of compound **1k**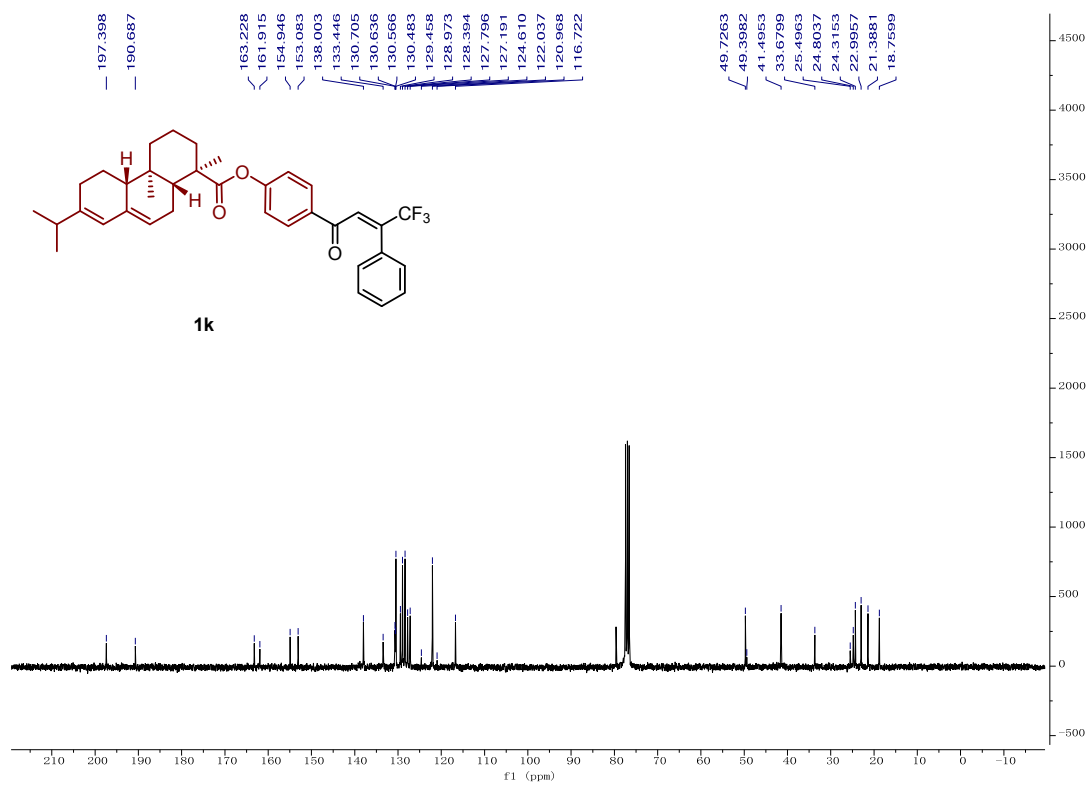

<sup>19</sup>F NMR (376 MHz, CDCl<sub>3</sub>) of compound **1k**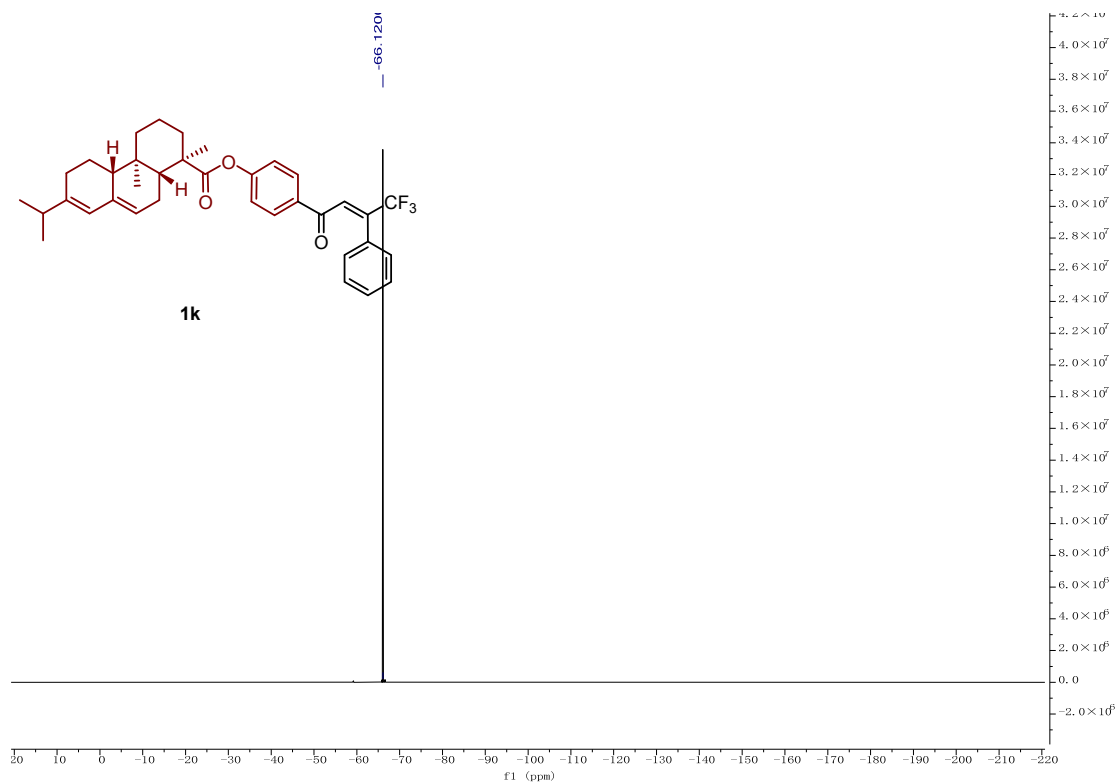<sup>1</sup>H NMR (300 MHz, CDCl<sub>3</sub>) of compound **1l**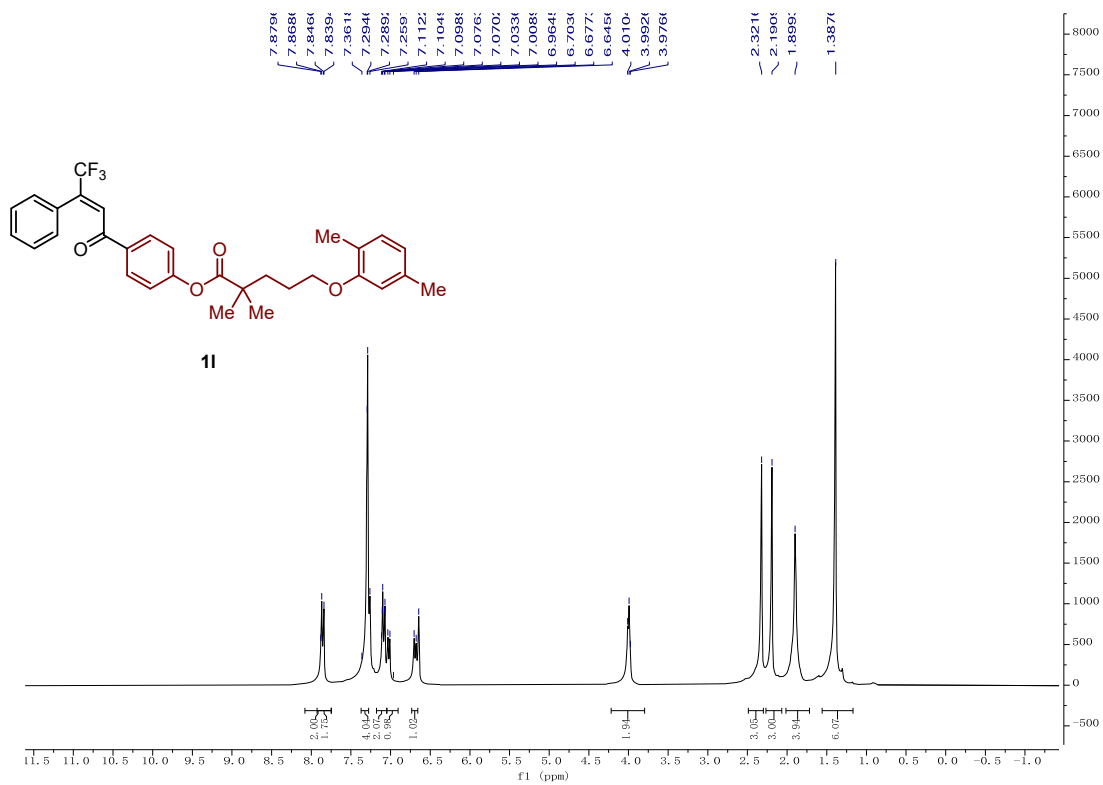

$^{13}\text{C}$  NMR (75 MHz,  $\text{CDCl}_3$ ) of compound **11**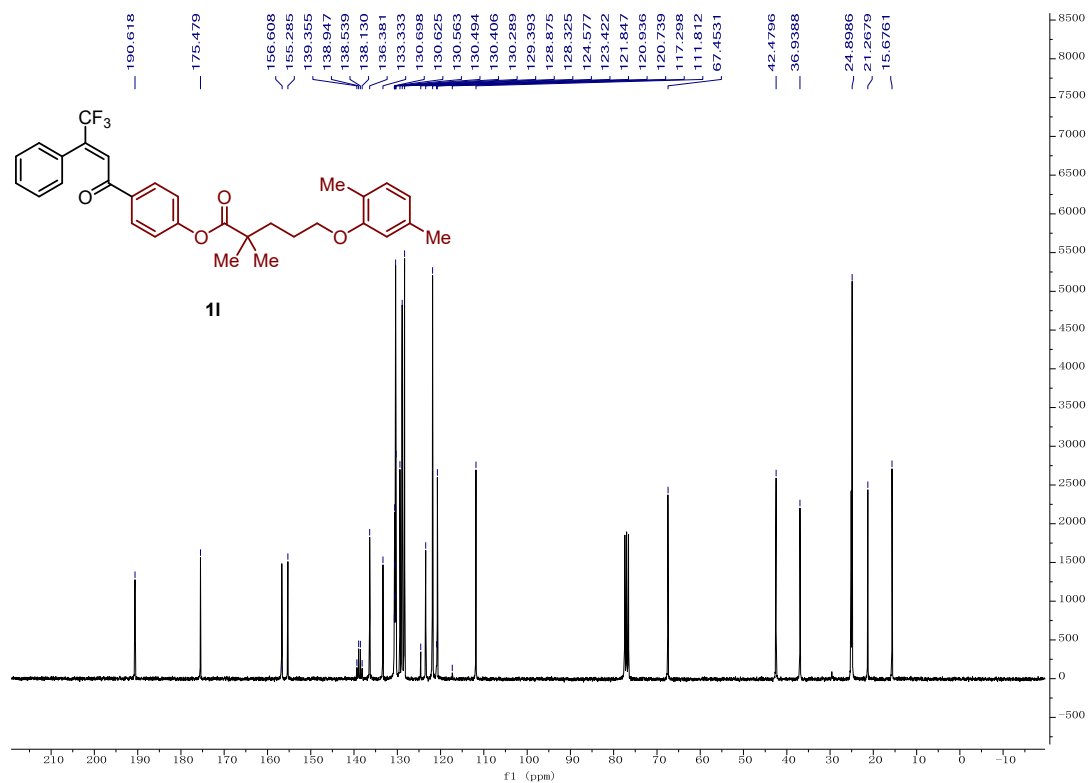 $^{19}\text{F}$  NMR (376 MHz,  $\text{CDCl}_3$ ) of compound **11**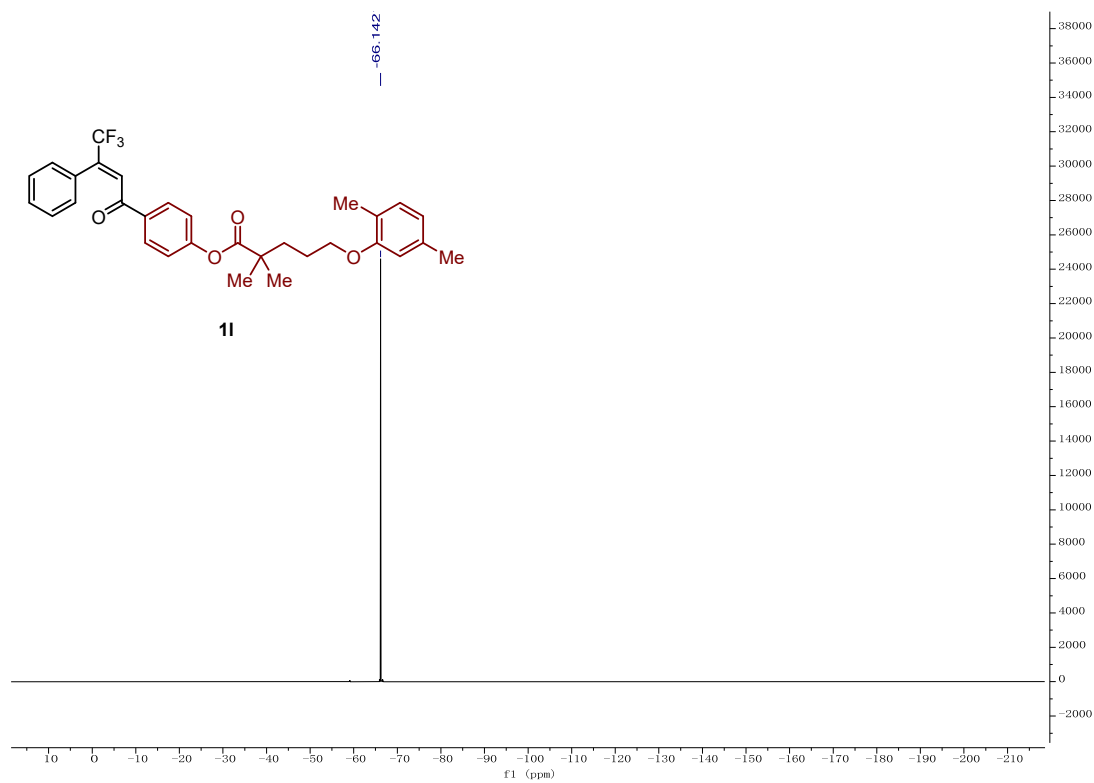

$^1\text{H}$  NMR (300 MHz,  $\text{CDCl}_3$ ) of compound **1m**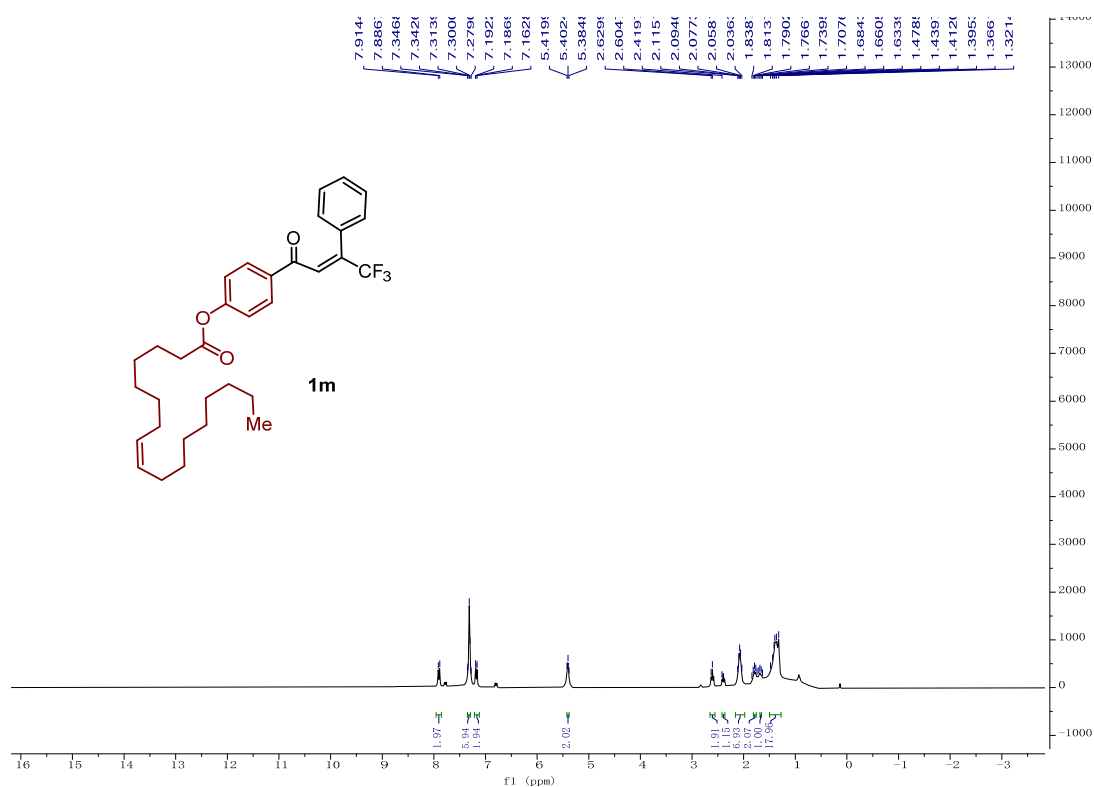 $^{13}\text{C}$  NMR (75 MHz,  $\text{CDCl}_3$ ) of compound **1m**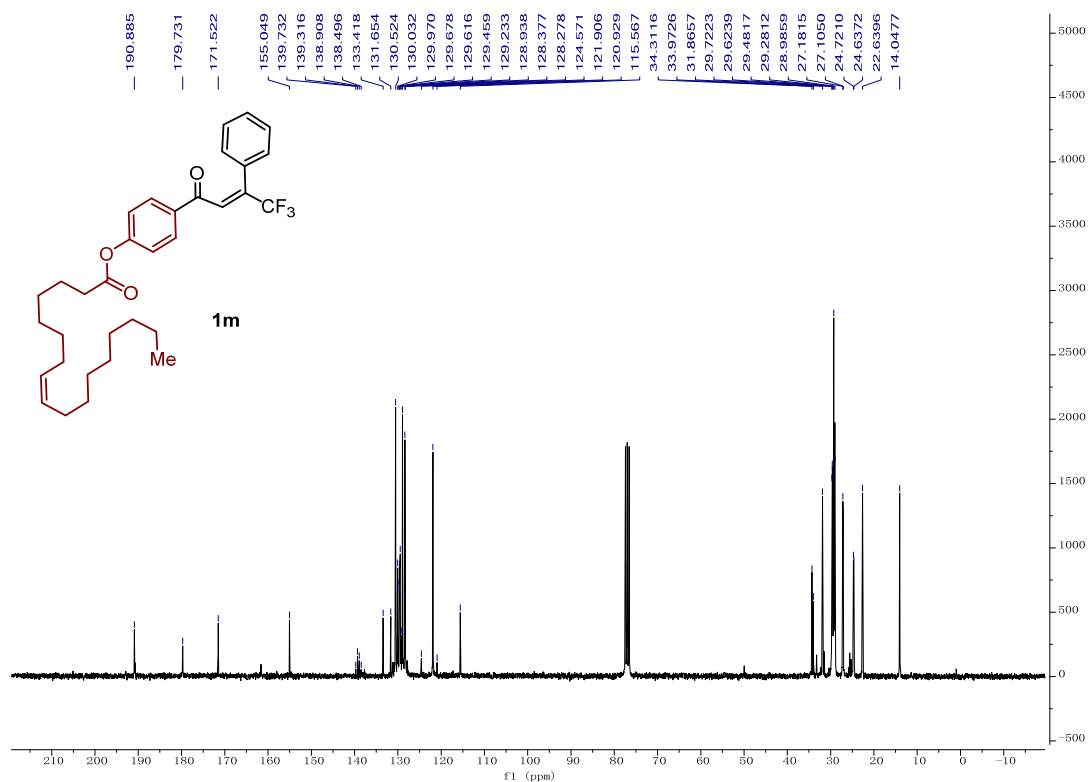

$^{19}\text{F}$  NMR (376 MHz,  $\text{CDCl}_3$ ) of compound **1m**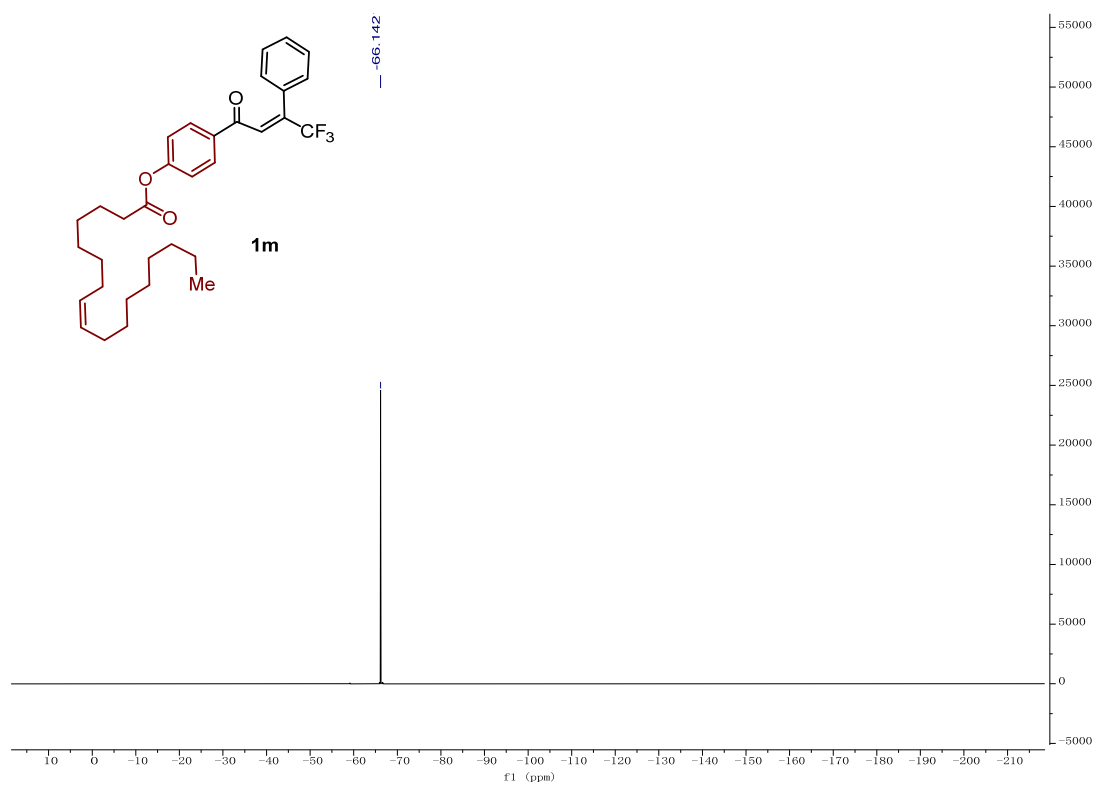 $^1\text{H}$  NMR (600 MHz,  $\text{CDCl}_3$ ) of compound **1n**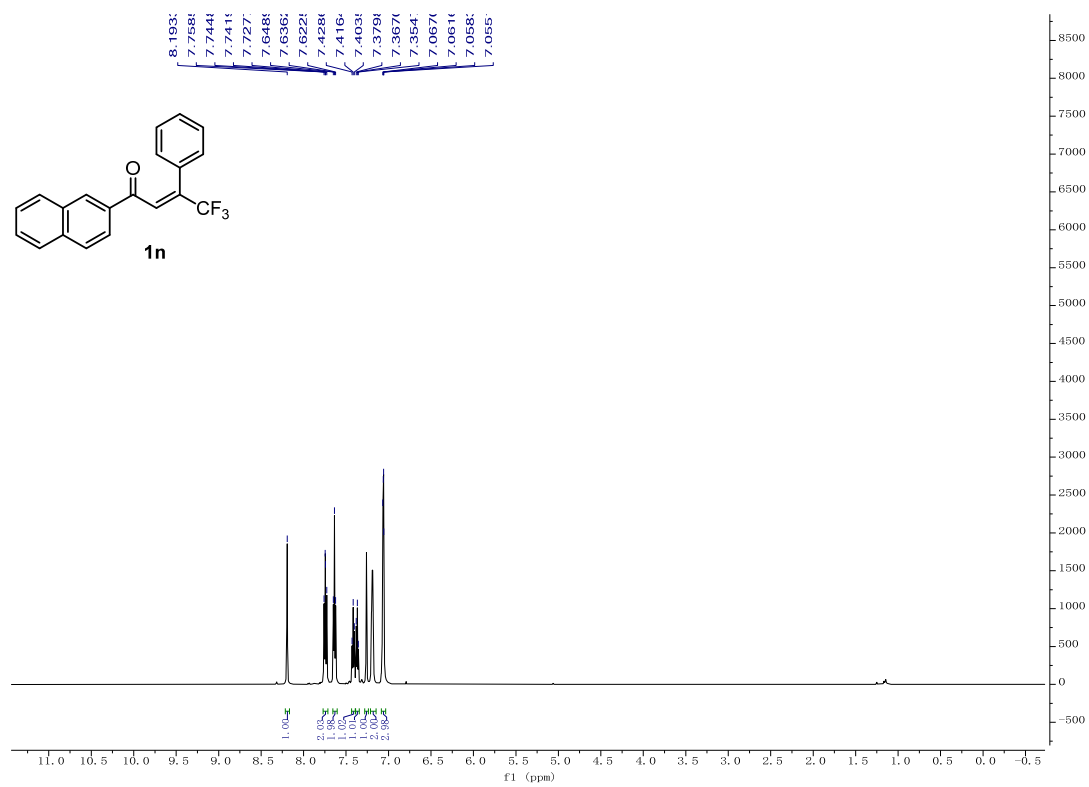



$^{13}\text{C}$  NMR (151 MHz,  $\text{CDCl}_3$ ) of compound **1n**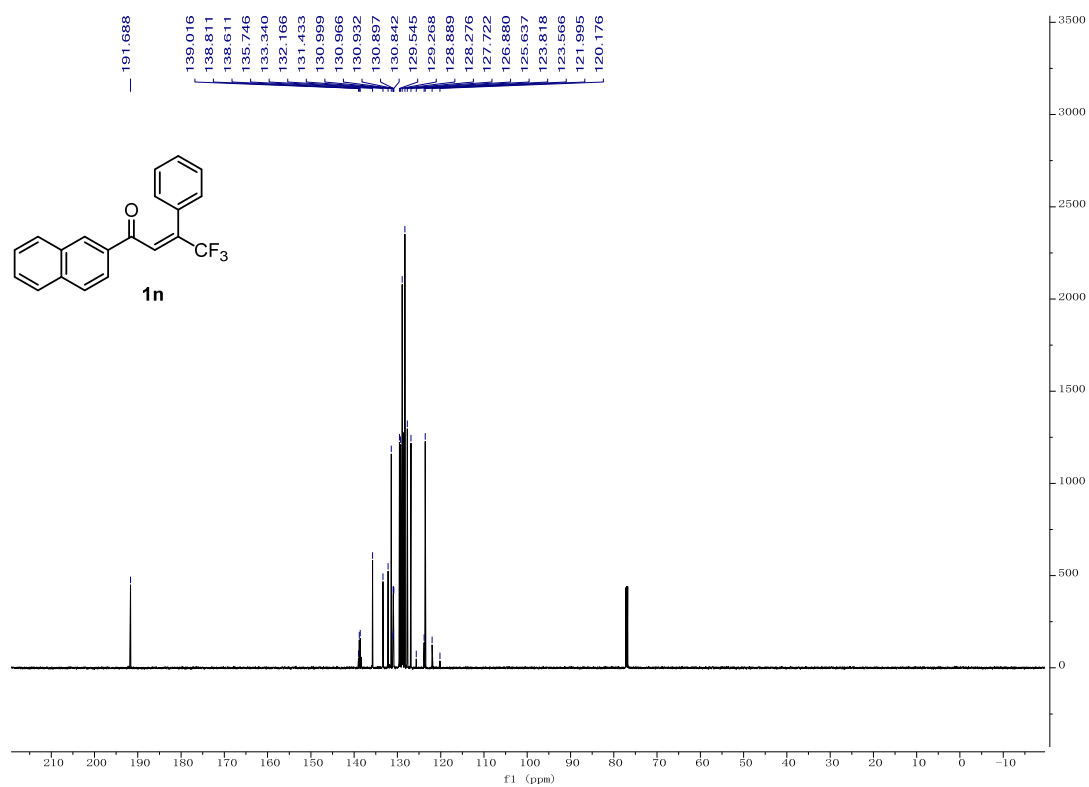 $^{19}\text{F}$  NMR (565 MHz,  $\text{CDCl}_3$ ) of compound **1n**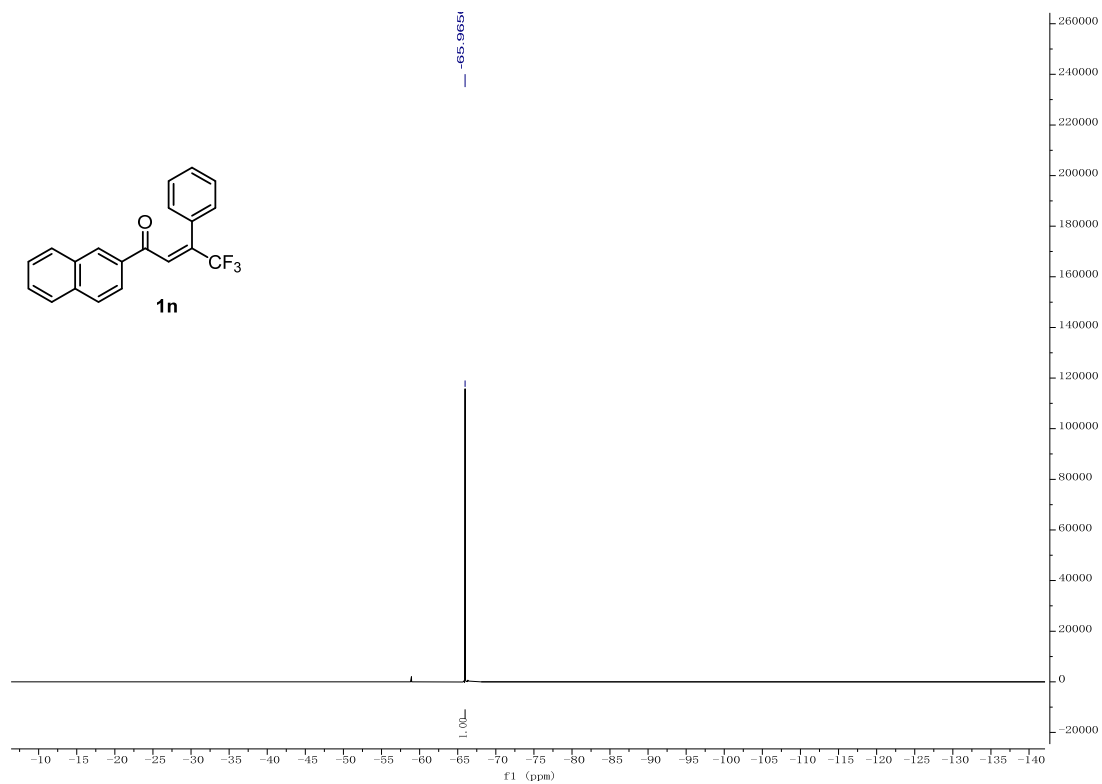

<sup>1</sup>H NMR (600 MHz, CDCl<sub>3</sub>) of compound **1o**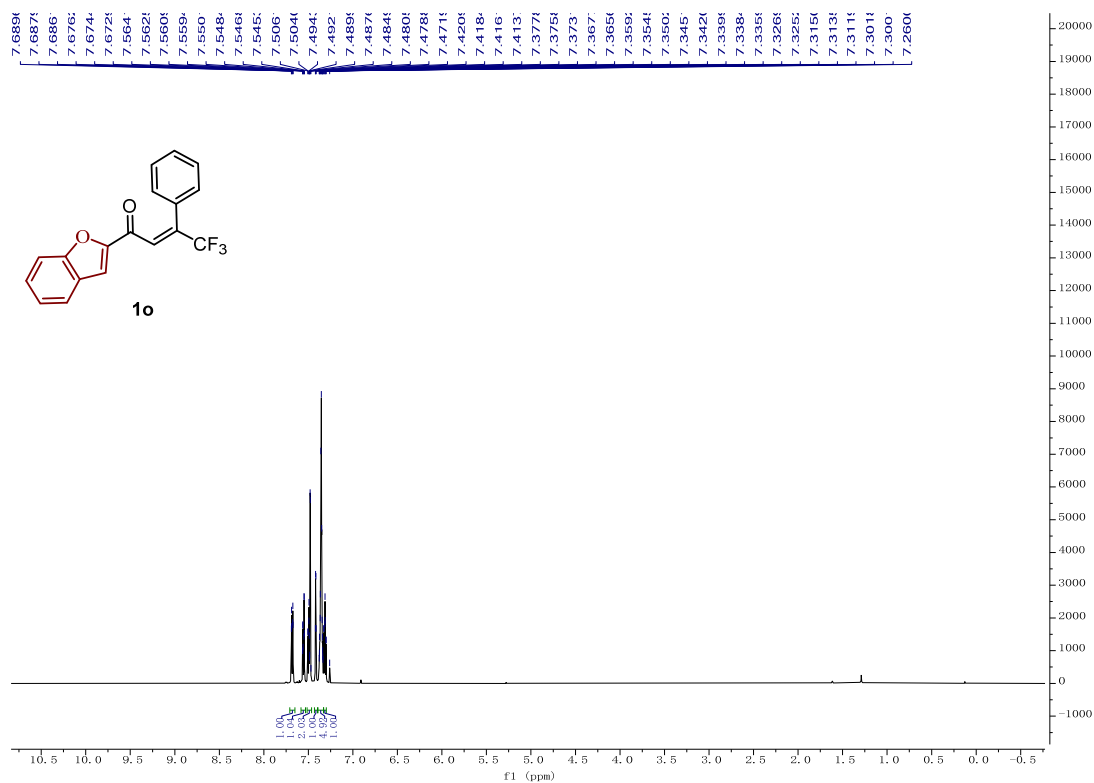<sup>13</sup>C NMR (151 MHz, CDCl<sub>3</sub>) of compound **2o**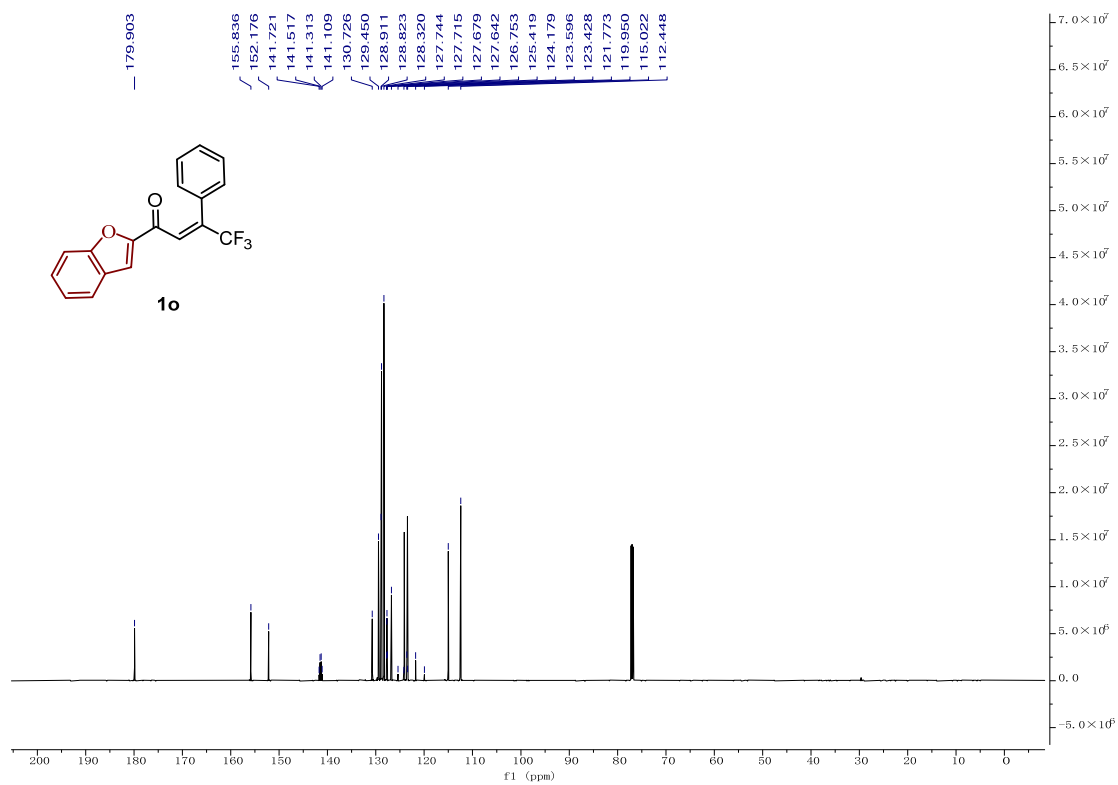

$^{19}\text{F}$  NMR (565 MHz,  $\text{CDCl}_3$ ) of compound **1o**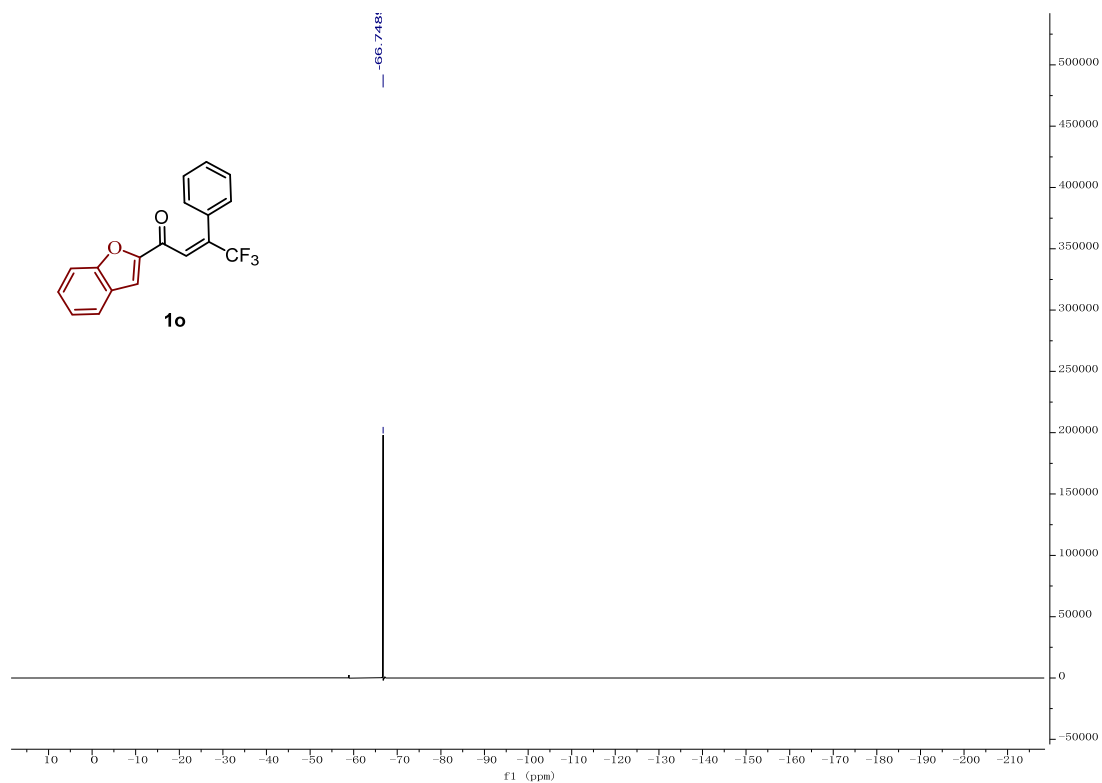 $^1\text{H}$  NMR (300 MHz,  $\text{CDCl}_3$ ) of compound **1p**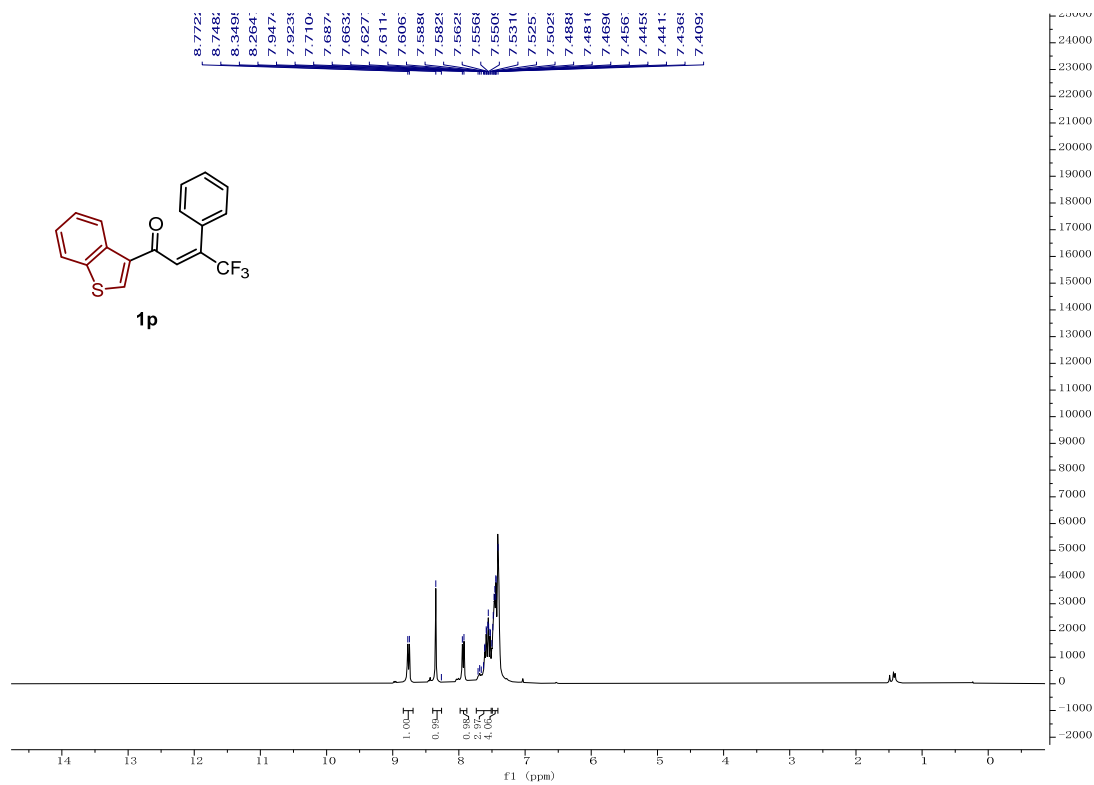

<sup>13</sup>C NMR (75 MHz, CDCl<sub>3</sub>) of compound **1p**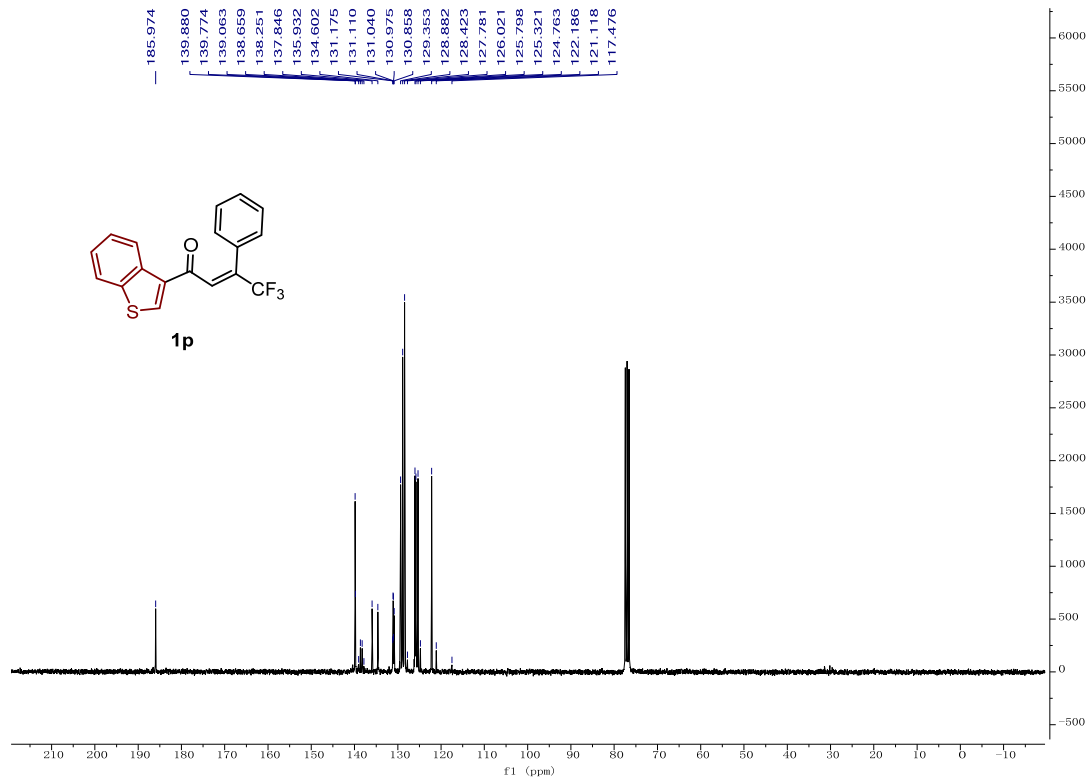<sup>19</sup>F NMR (376 MHz, CDCl<sub>3</sub>) of compound **1p**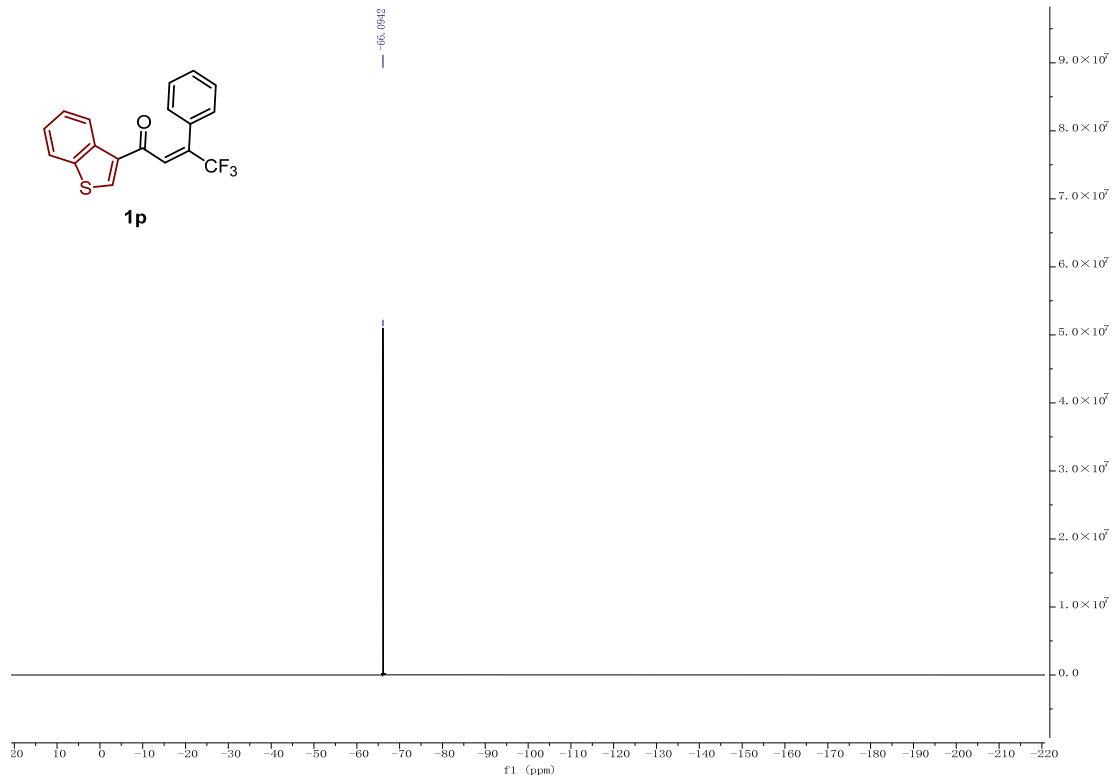

<sup>1</sup>H NMR (600 MHz, CDCl<sub>3</sub>) of compound **1q**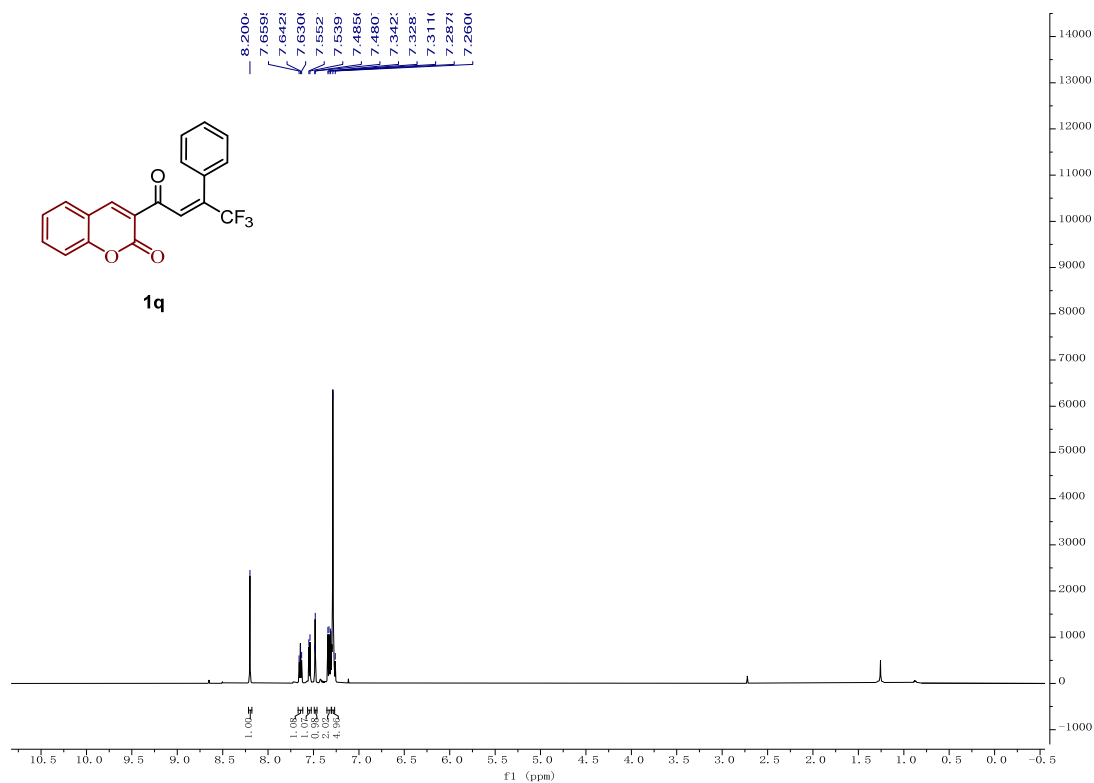<sup>13</sup>C NMR (151 MHz, CDCl<sub>3</sub>) of compound **1q**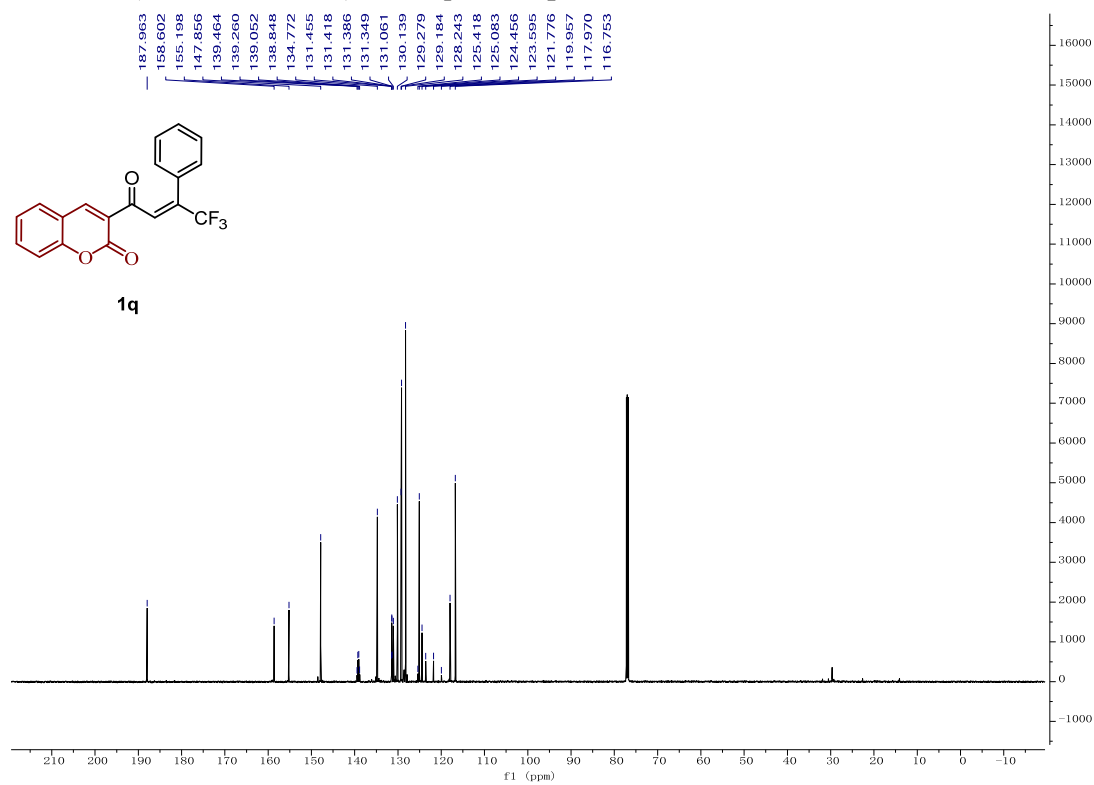

$^{19}\text{F}$  NMR (565 MHz,  $\text{CDCl}_3$ ) of compound **1q**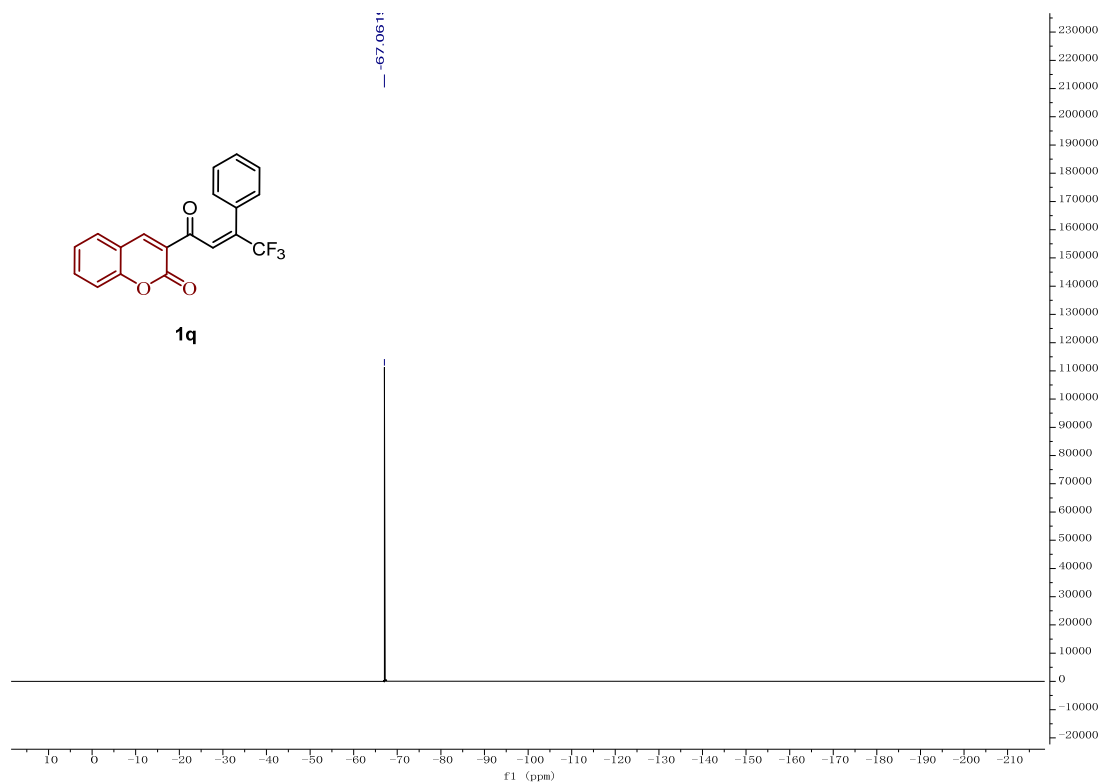 $^1\text{H}$  NMR (300 MHz,  $\text{CDCl}_3$ ) of compound **1r**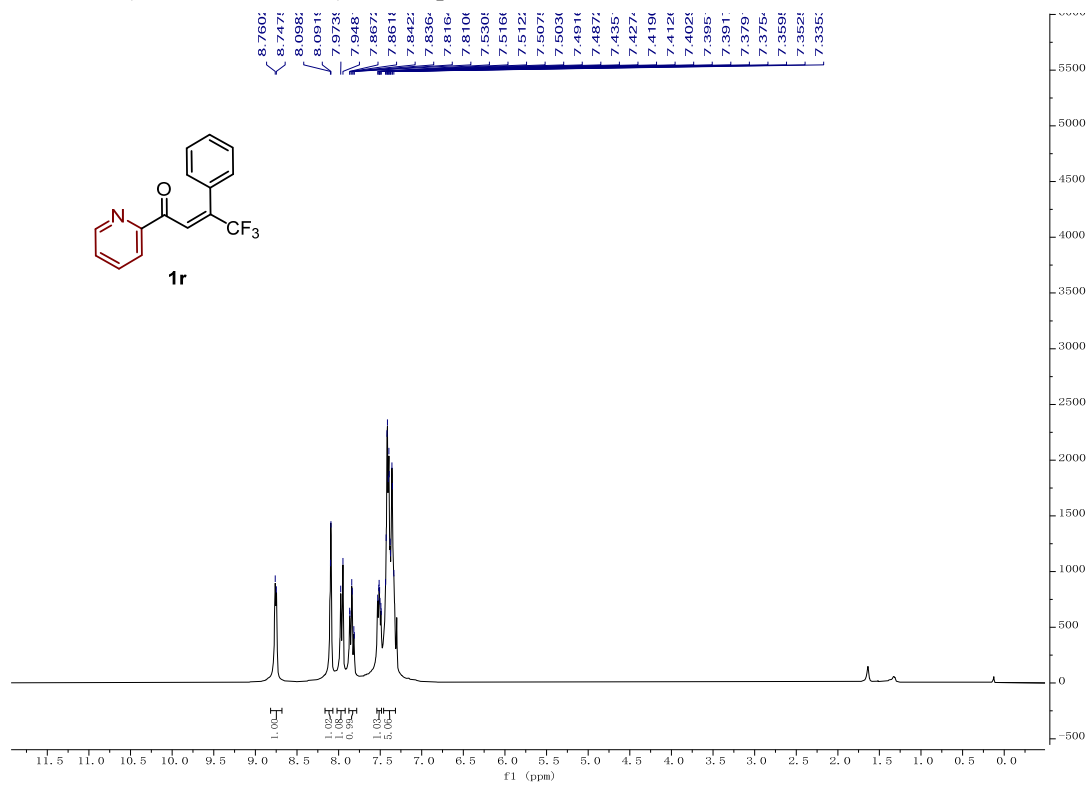

$^{13}\text{C}$  NMR (75 MHz,  $\text{CDCl}_3$ ) of compound **1r**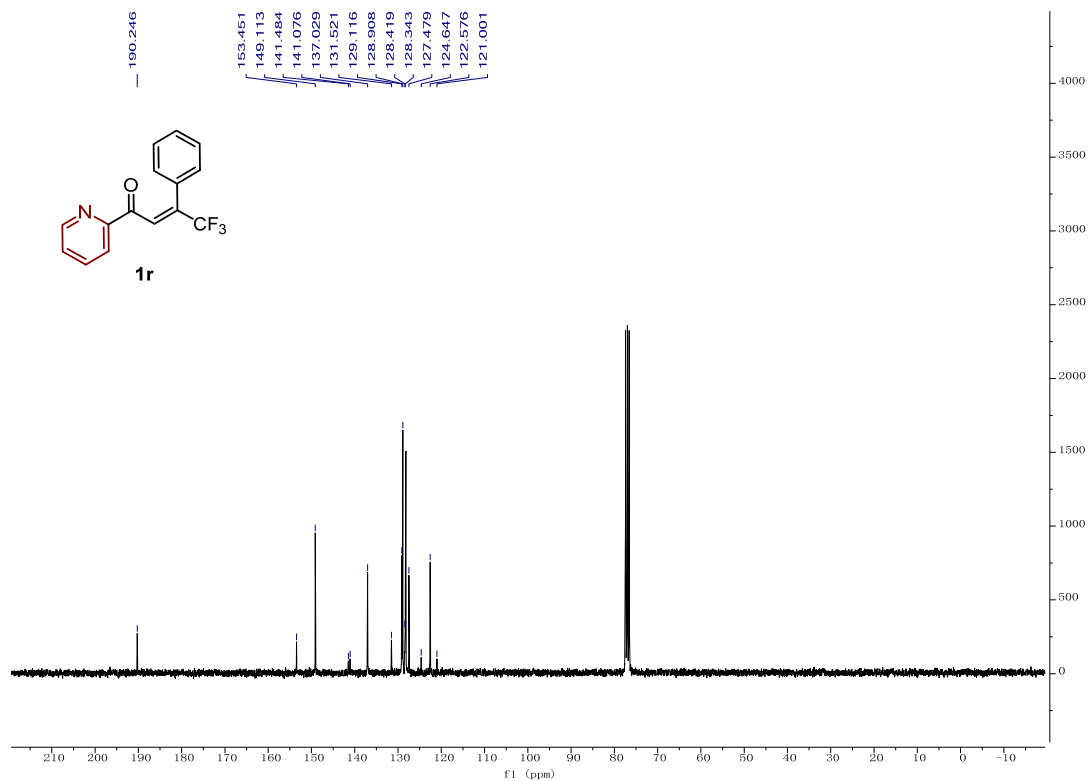 $^{19}\text{F}$  NMR (376 MHz,  $\text{CDCl}_3$ ) of compound **1r**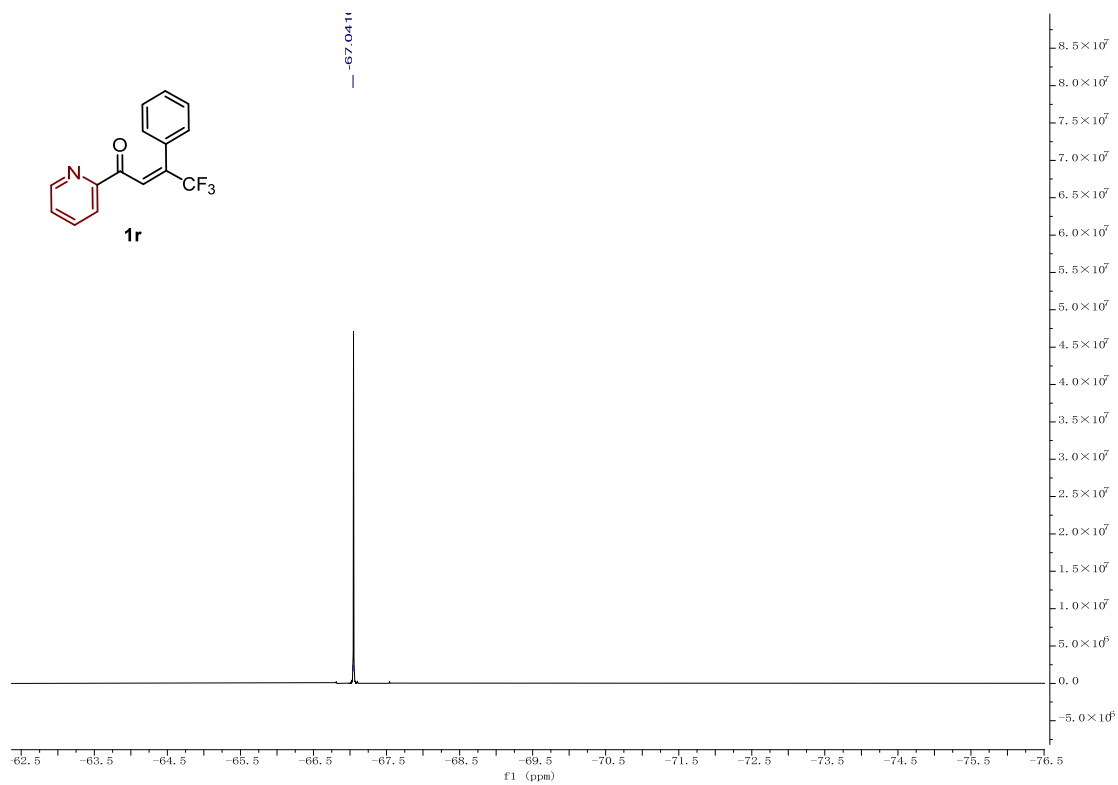

$^1\text{H}$  NMR (300 MHz,  $\text{CDCl}_3$ ) of compound **1t**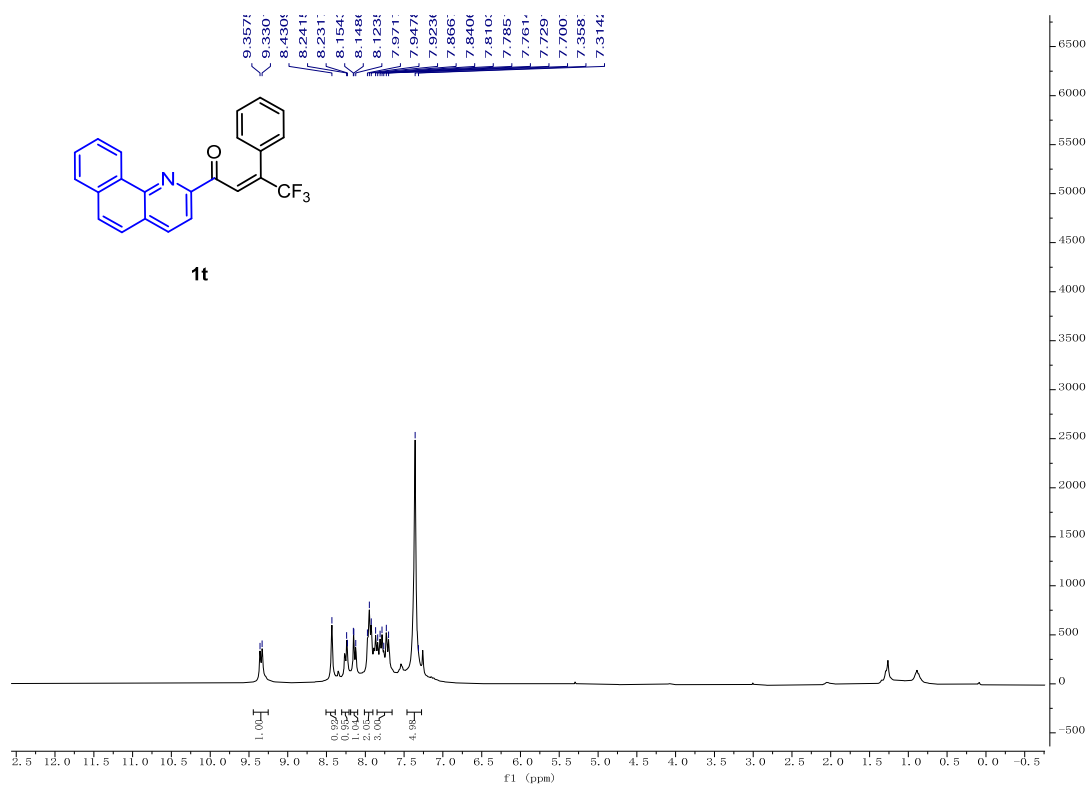 $^{13}\text{C}$  NMR (75 MHz,  $\text{CDCl}_3$ ) of compound **1t**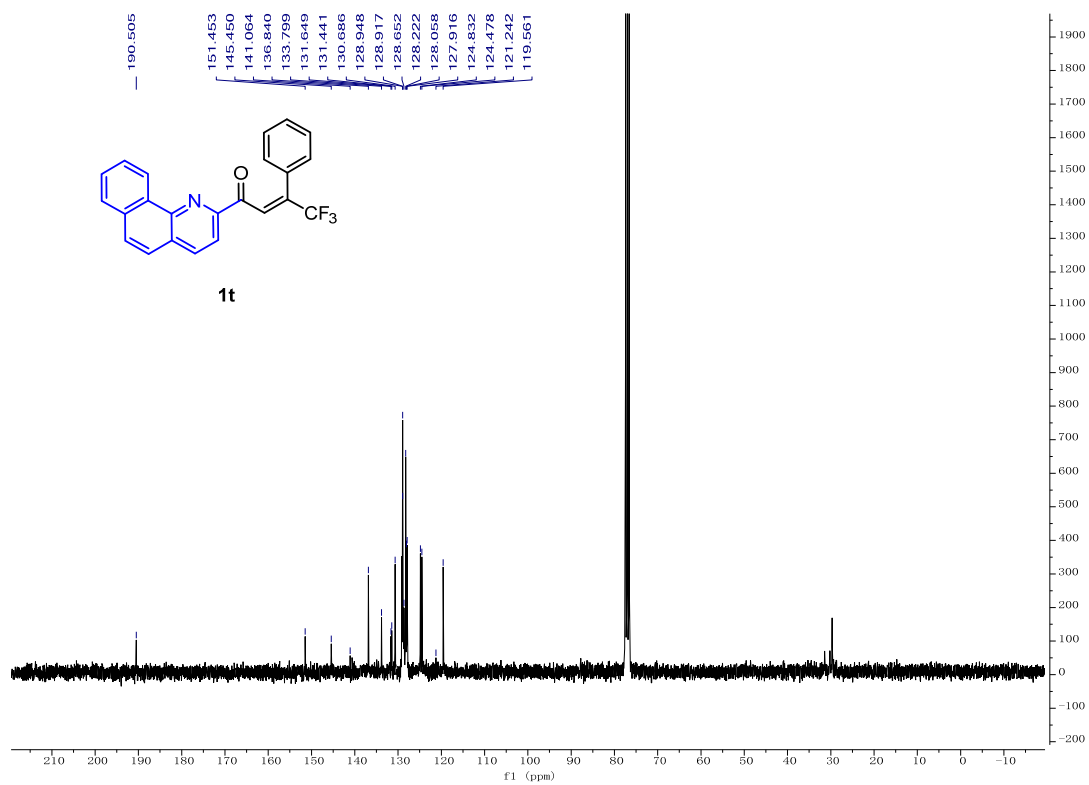



$^{19}\text{F}$  NMR (376 MHz,  $\text{CDCl}_3$ ) of compound **1t**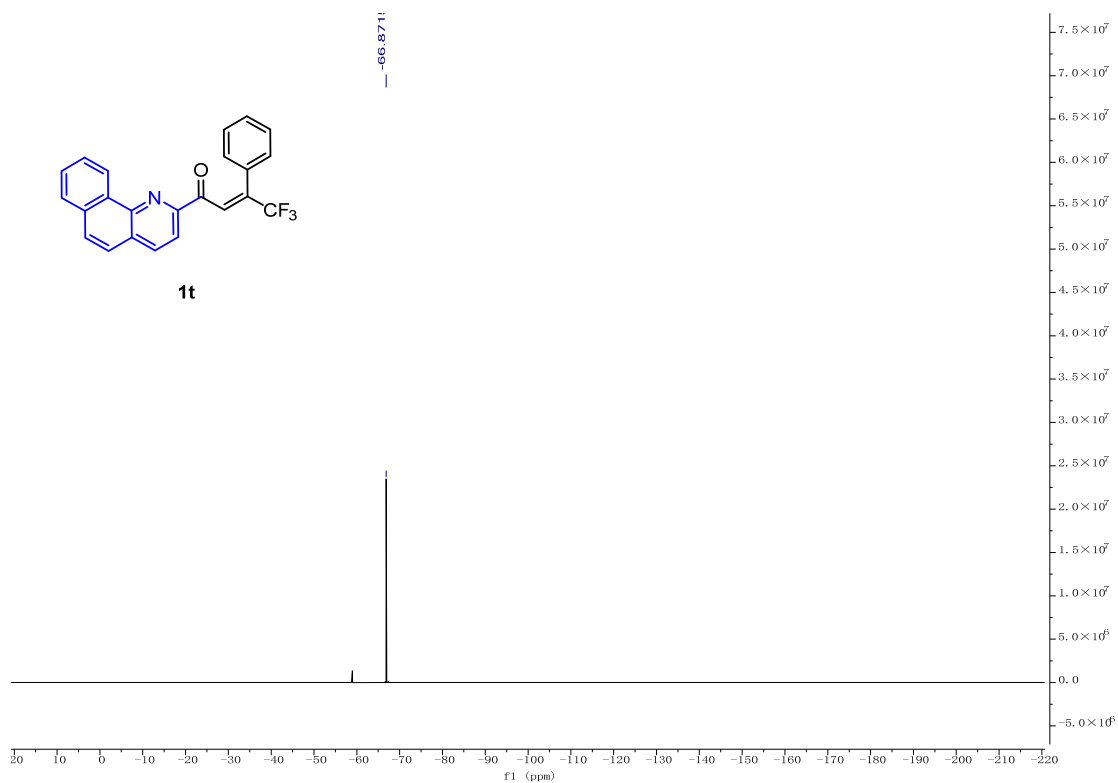 $^1\text{H}$  NMR (300 MHz,  $\text{CDCl}_3$ ) of compound **1u**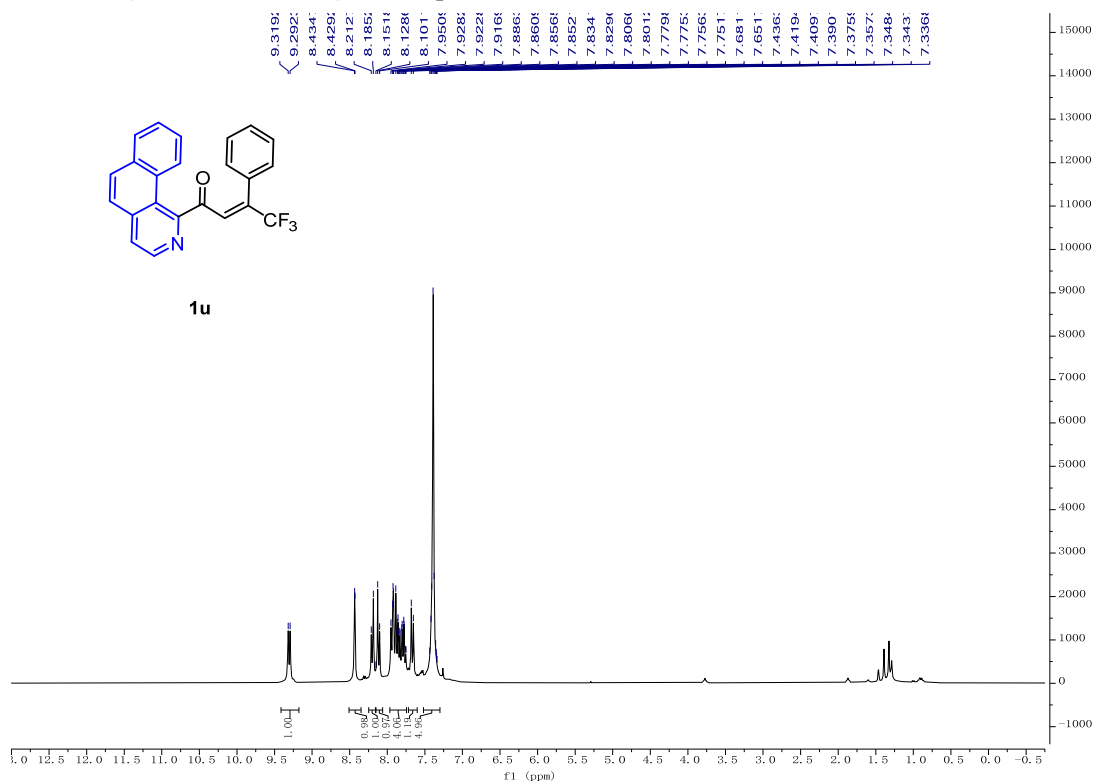

$^{13}\text{C}$  NMR (151 MHz,  $\text{CDCl}_3$ ) of compound **1u**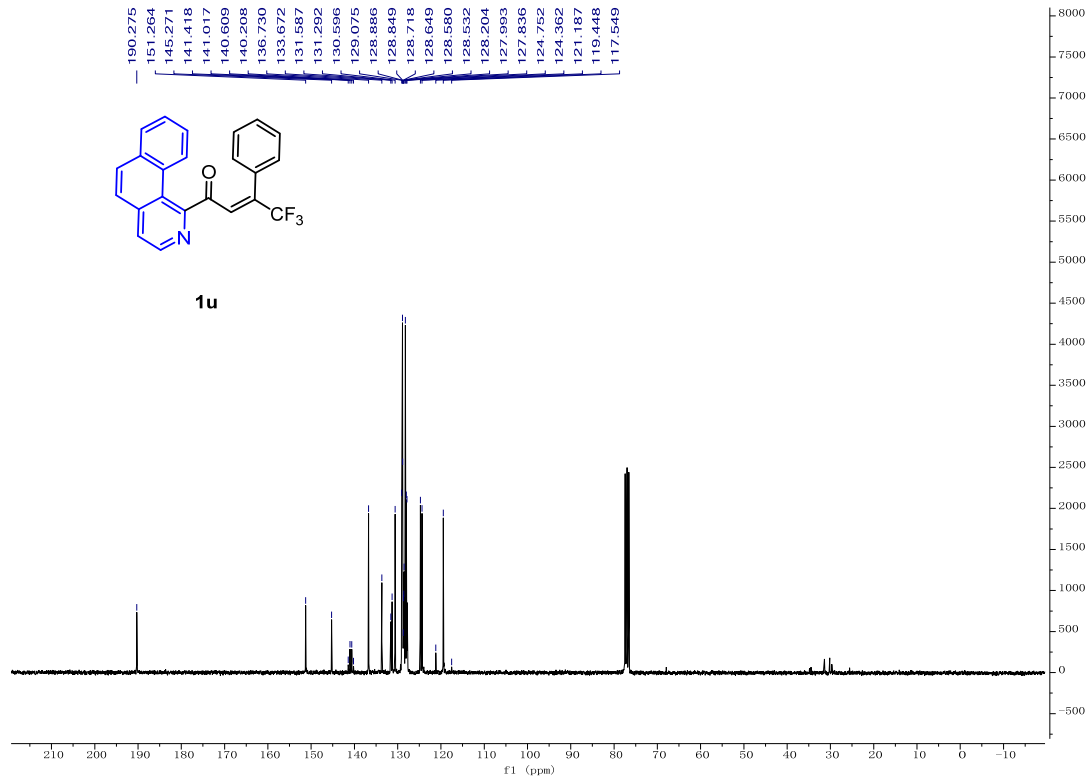 $^{19}\text{F}$  NMR (376 MHz,  $\text{CDCl}_3$ ) of compound **1u**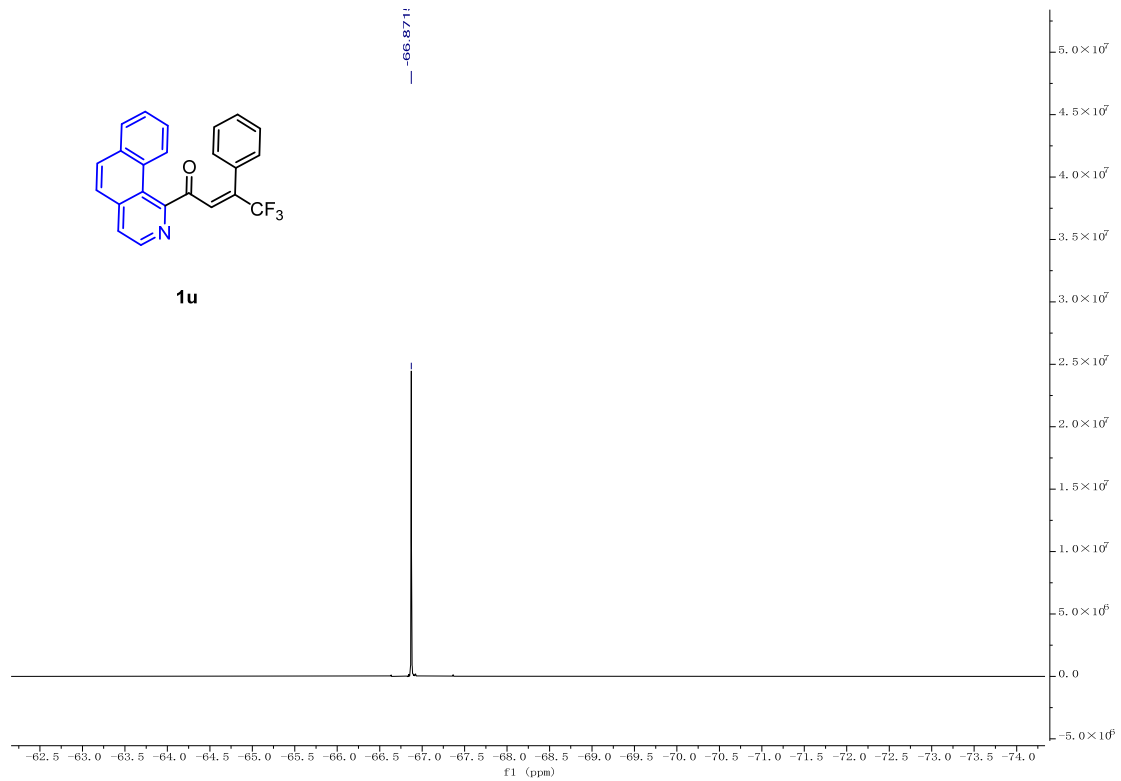

$^1\text{H}$  NMR (600 MHz,  $\text{CDCl}_3$ ) of compound **1v**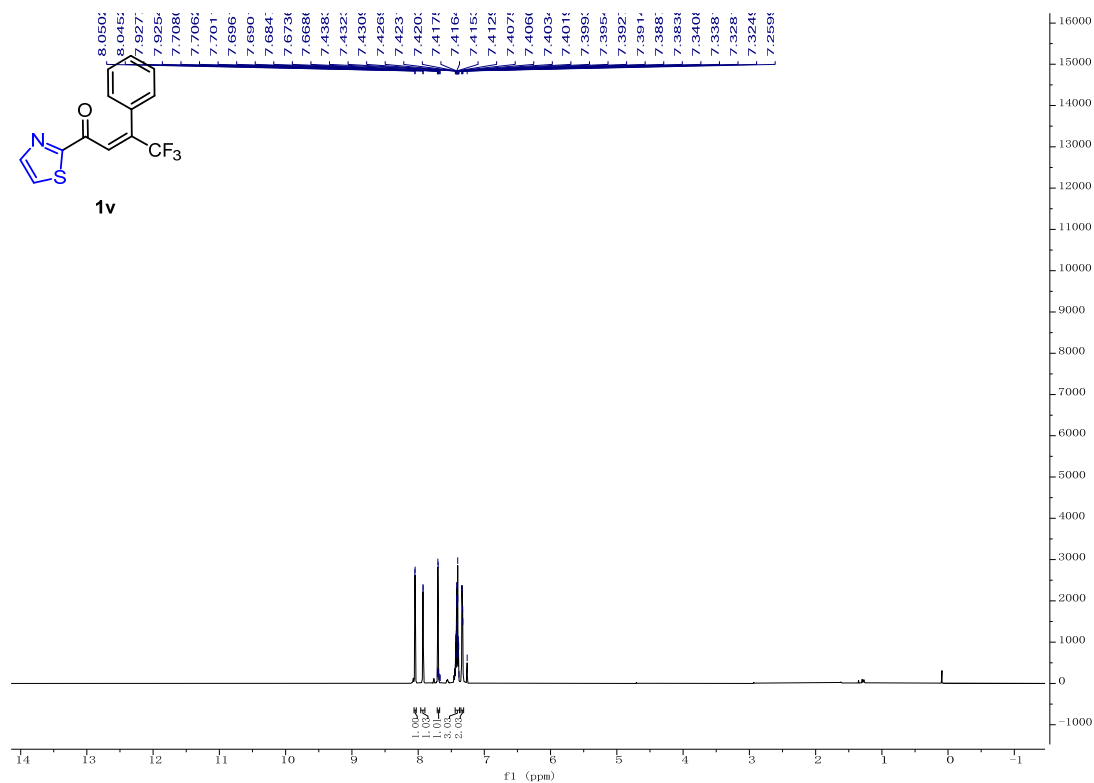 $^{13}\text{C}$  NMR (151 MHz,  $\text{CDCl}_3$ ) of compound **1v**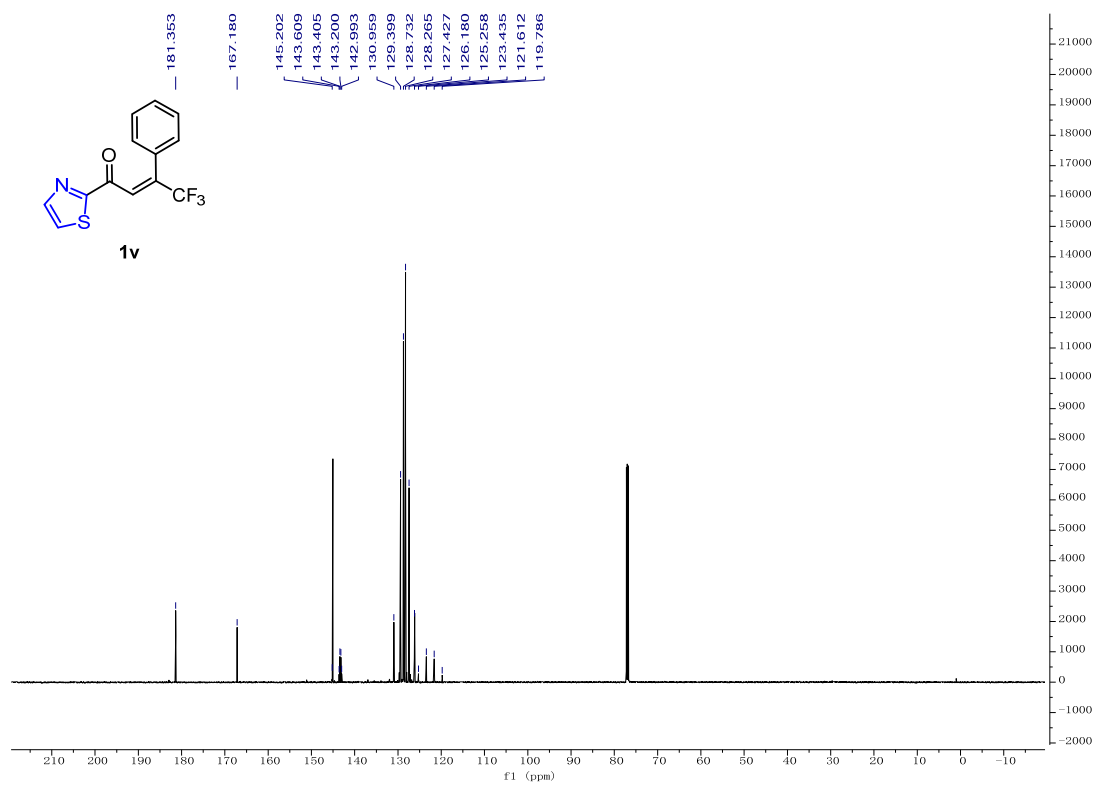

$^{19}\text{F}$  NMR (565 MHz,  $\text{CDCl}_3$ ) of compound **1v**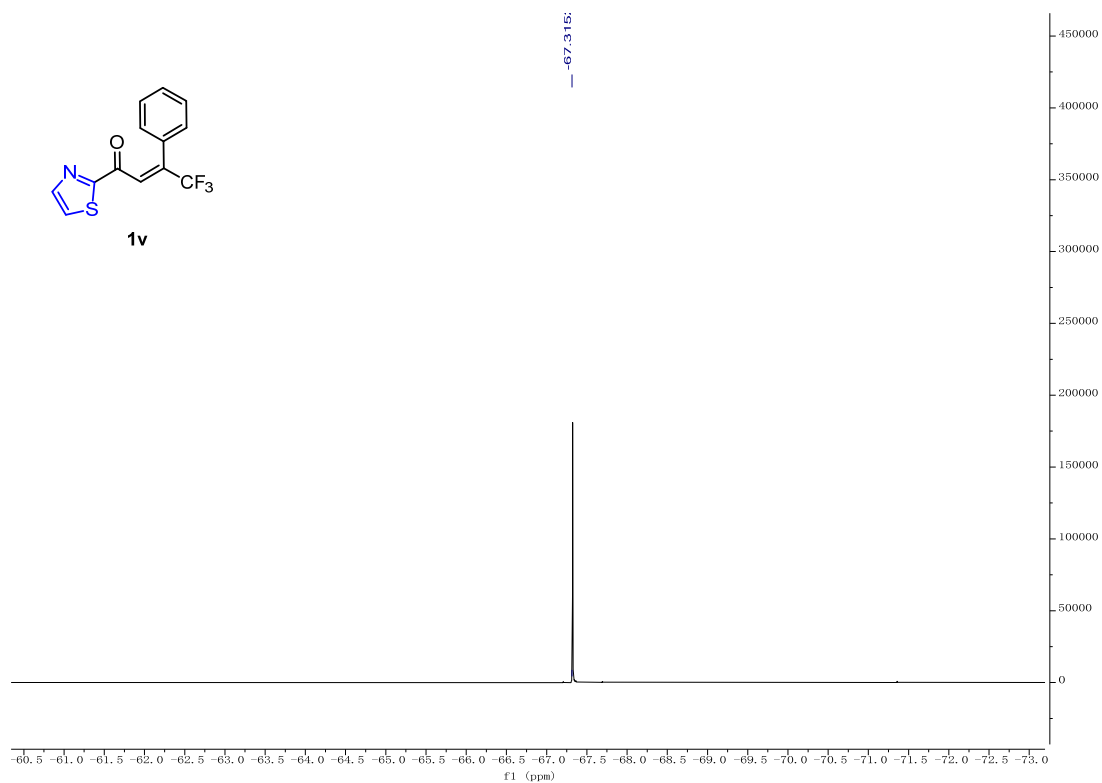 $^1\text{H}$  NMR (300 MHz,  $\text{CDCl}_3$ ) of compound **1w**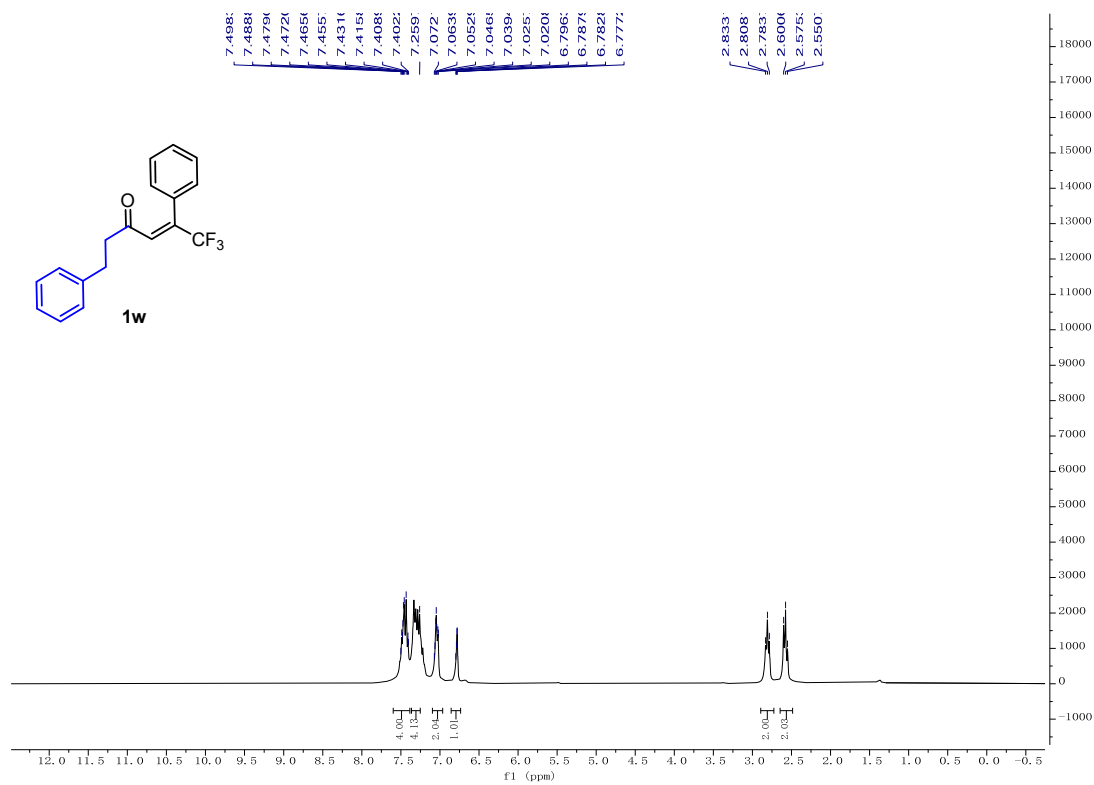

$^{13}\text{C}$  NMR (75 MHz,  $\text{CDCl}_3$ ) of compound **1w**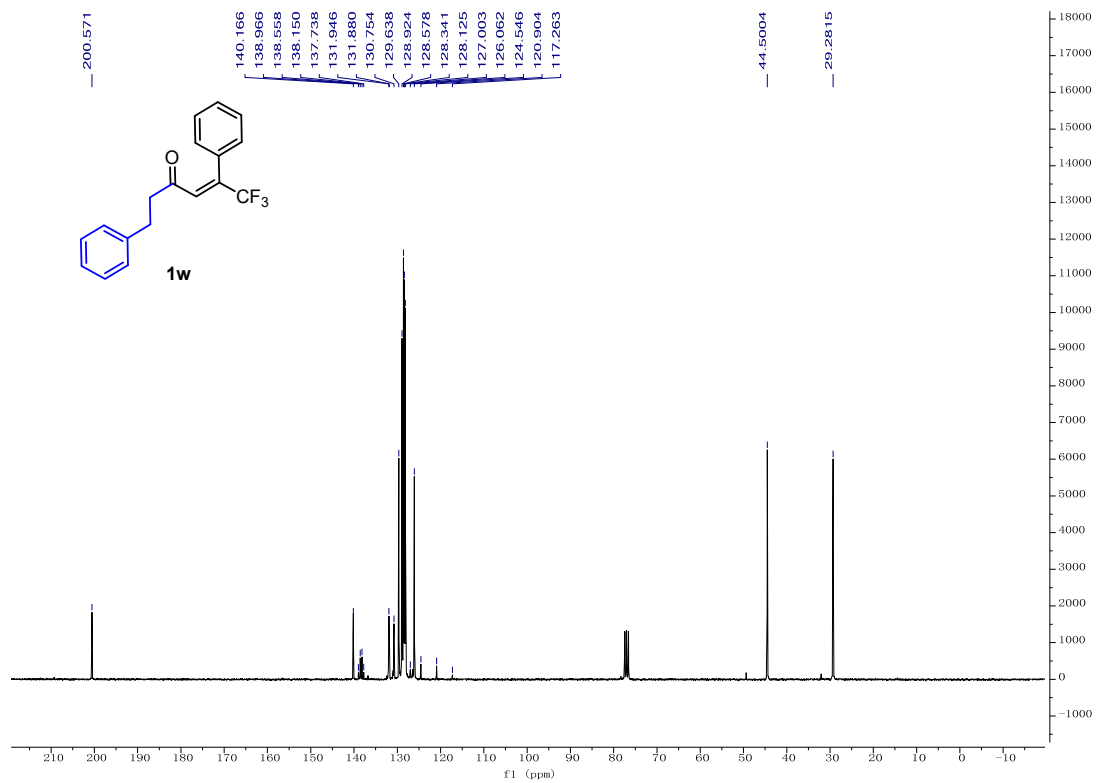 $^{19}\text{F}$  NMR (376 MHz,  $\text{CDCl}_3$ ) of compound **1w**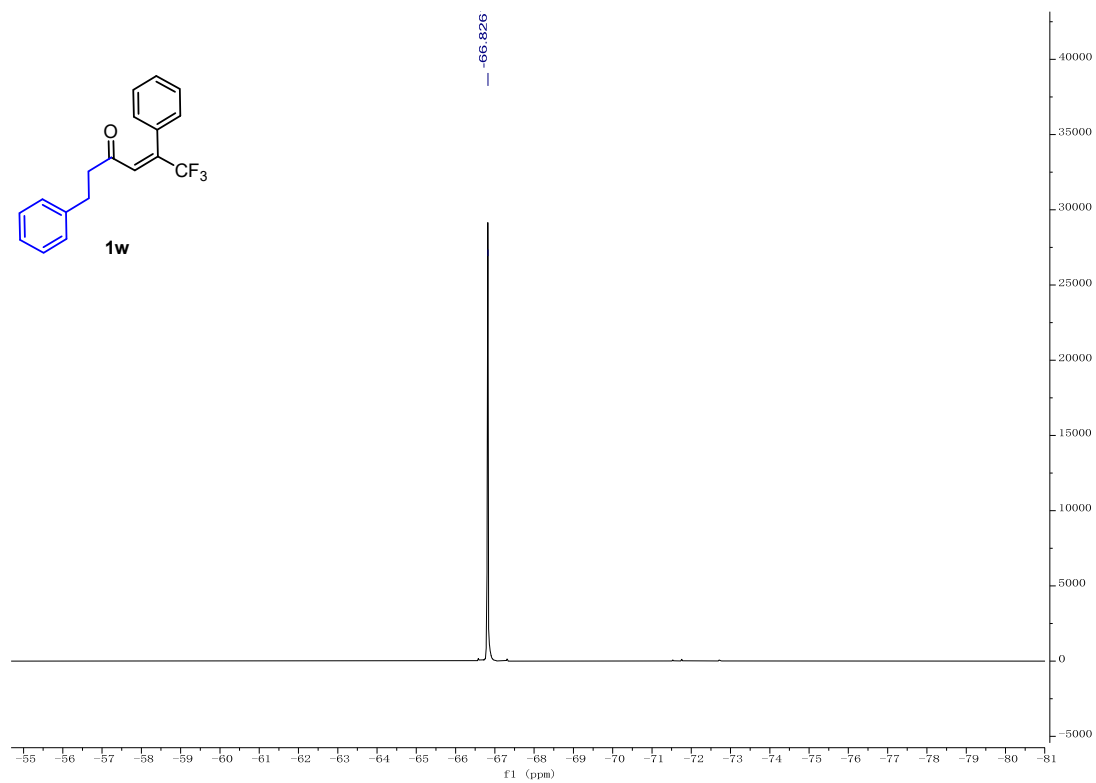

$^1\text{H}$  NMR (300 MHz,  $\text{CDCl}_3$ ) of compound **1x**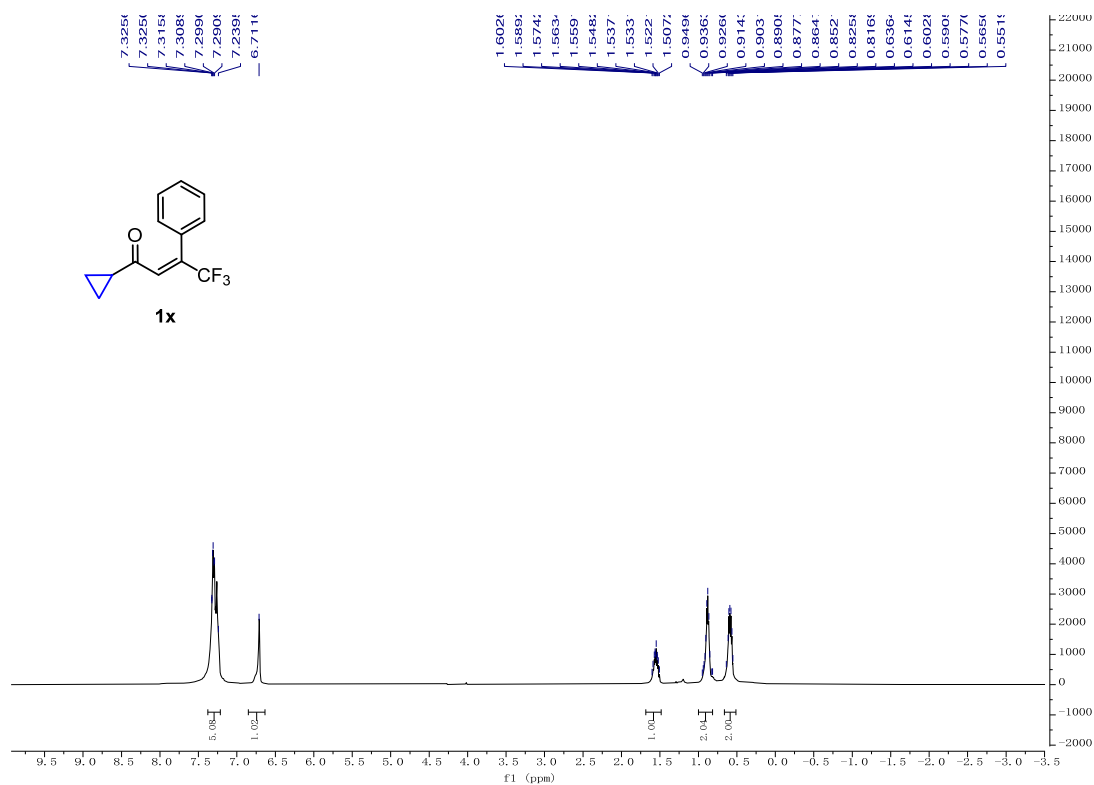 $^{13}\text{C}$  NMR (75 MHz,  $\text{CDCl}_3$ ) of compound **1x**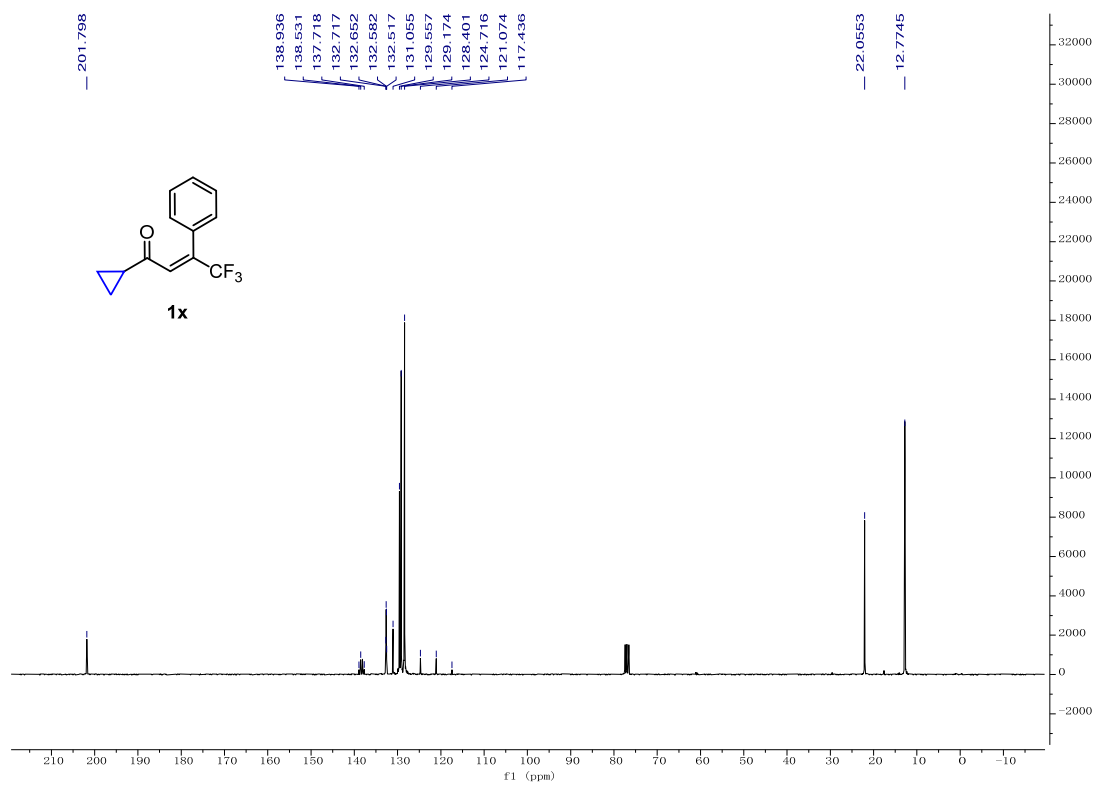

$^{19}\text{F}$  NMR (376 MHz,  $\text{CDCl}_3$ ) of compound **1x**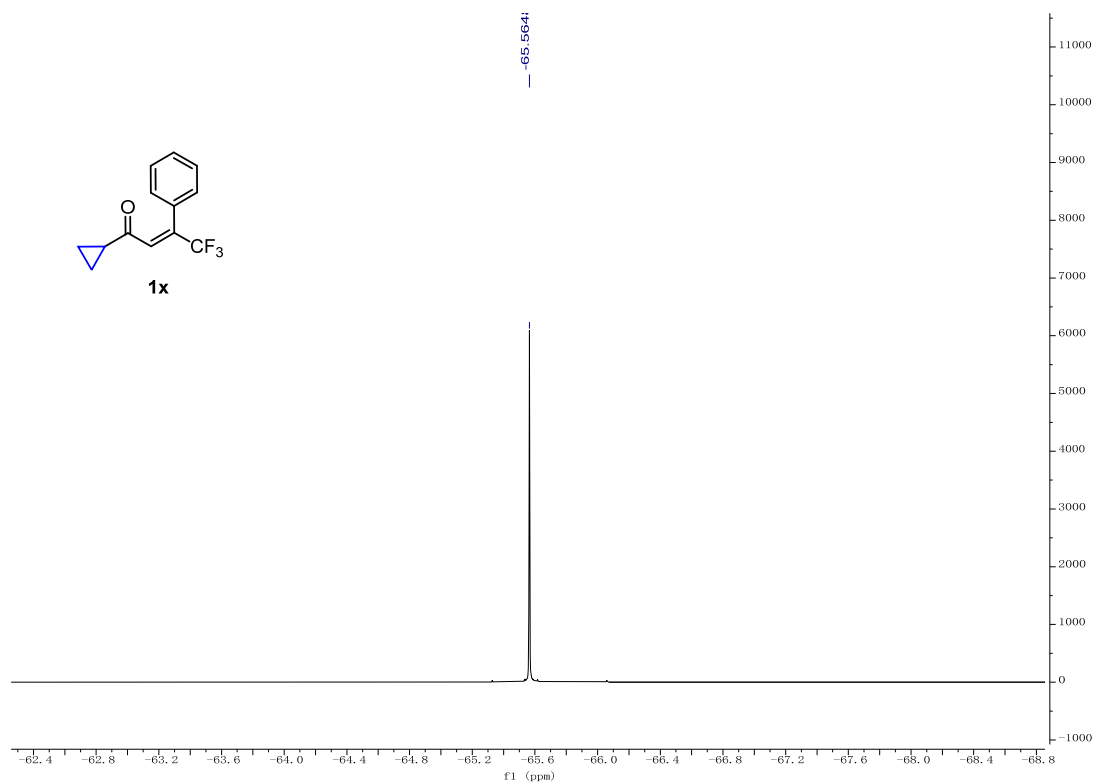 $^1\text{H}$  NMR (300 MHz,  $\text{CDCl}_3$ ) of compound **1y**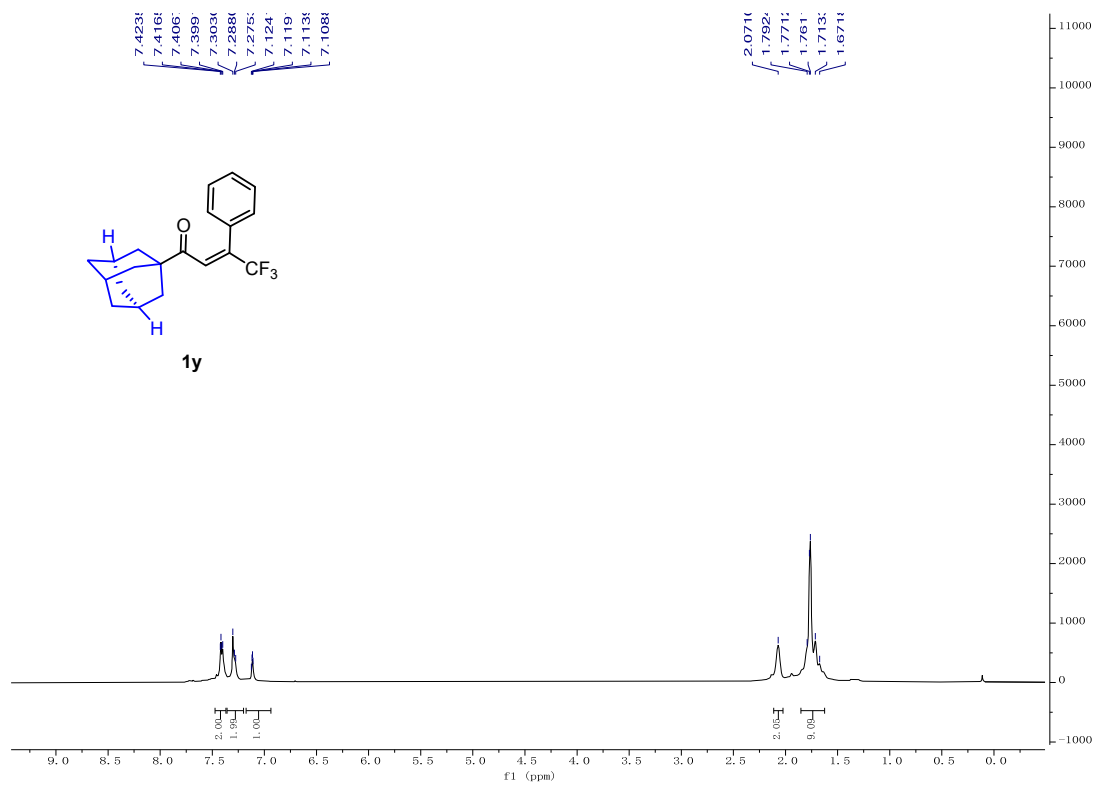

$^{13}\text{C}$  NMR (75 MHz,  $\text{CDCl}_3$ ) of compound **1y**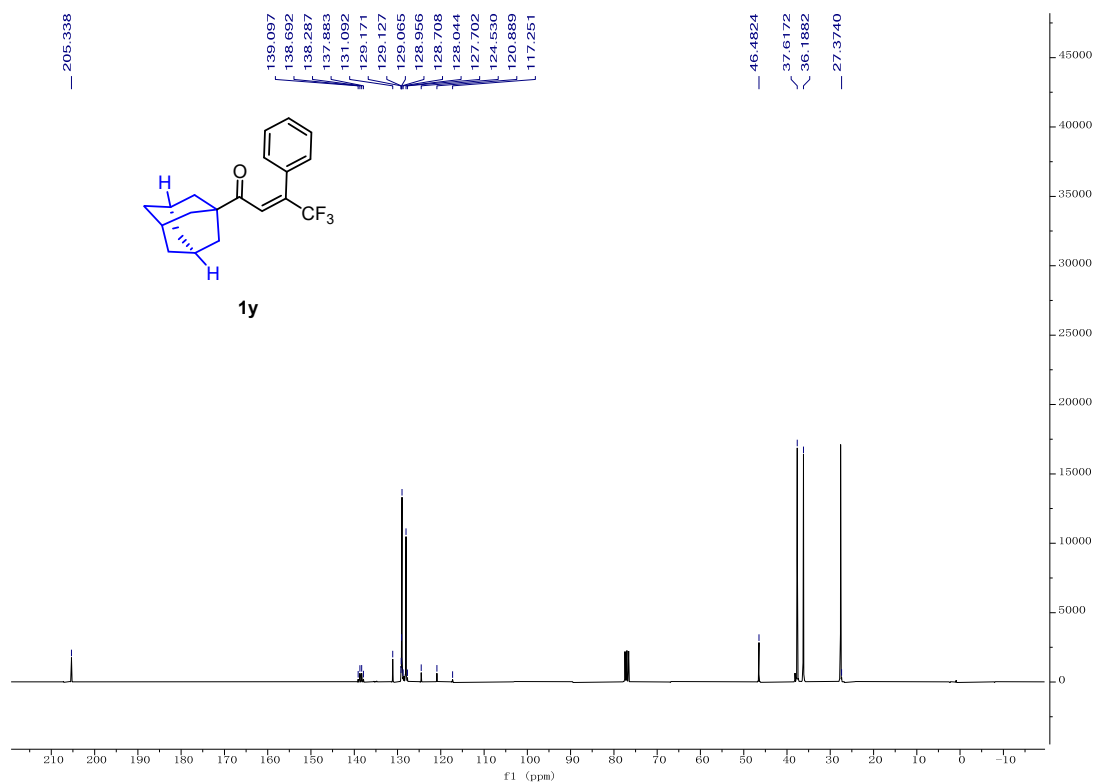 $^{19}\text{F}$  NMR (376 MHz,  $\text{CDCl}_3$ ) of compound **1y**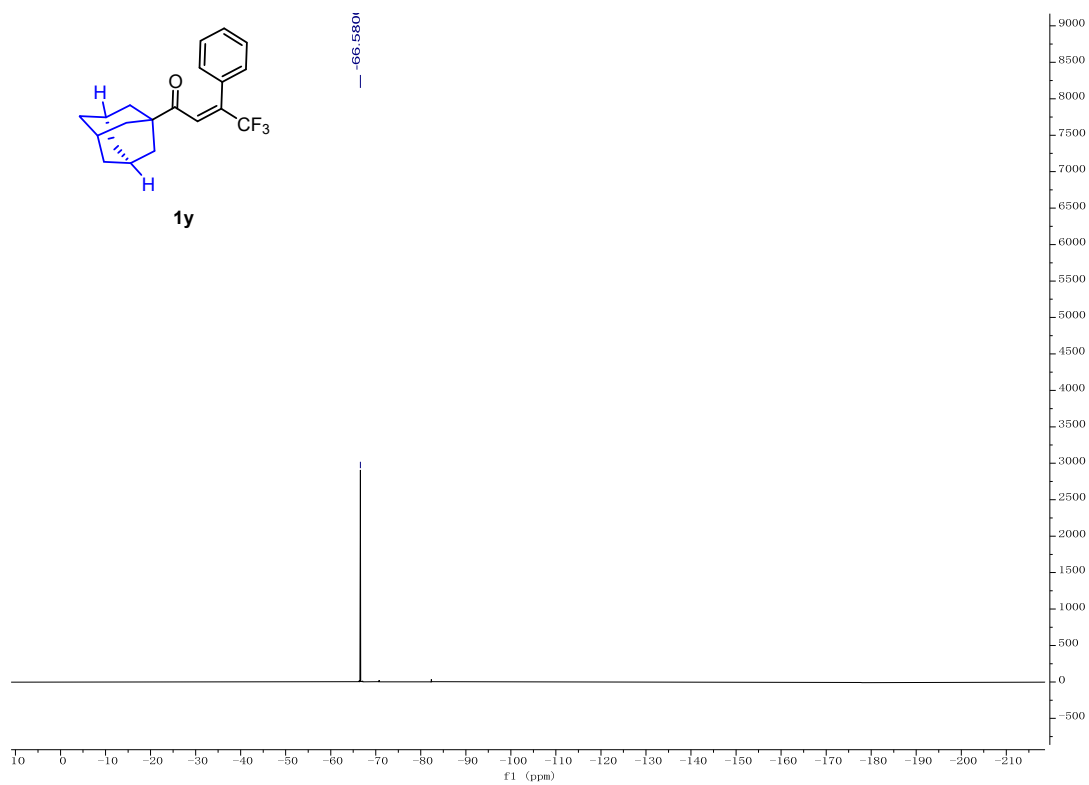



$^1\text{H}$  NMR (300 MHz,  $\text{CDCl}_3$ ) of compound **1za**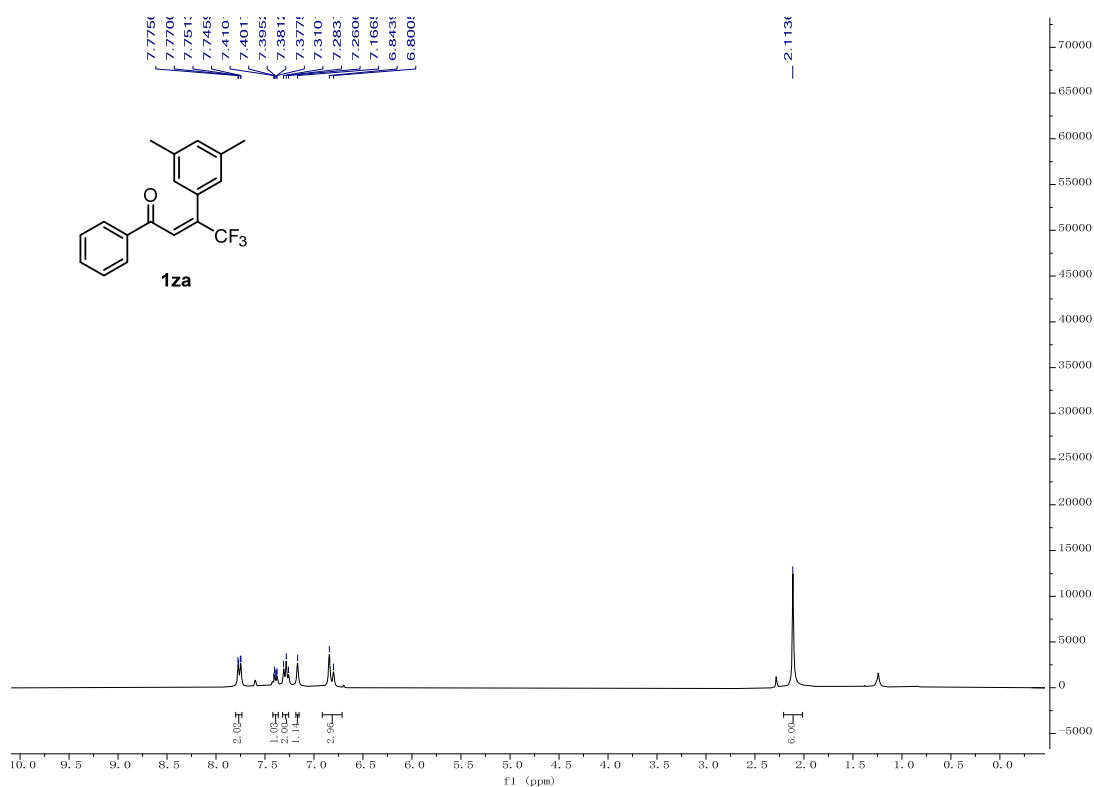 $^{13}\text{C}$  NMR (75 MHz,  $\text{CDCl}_3$ ) of compound **1za**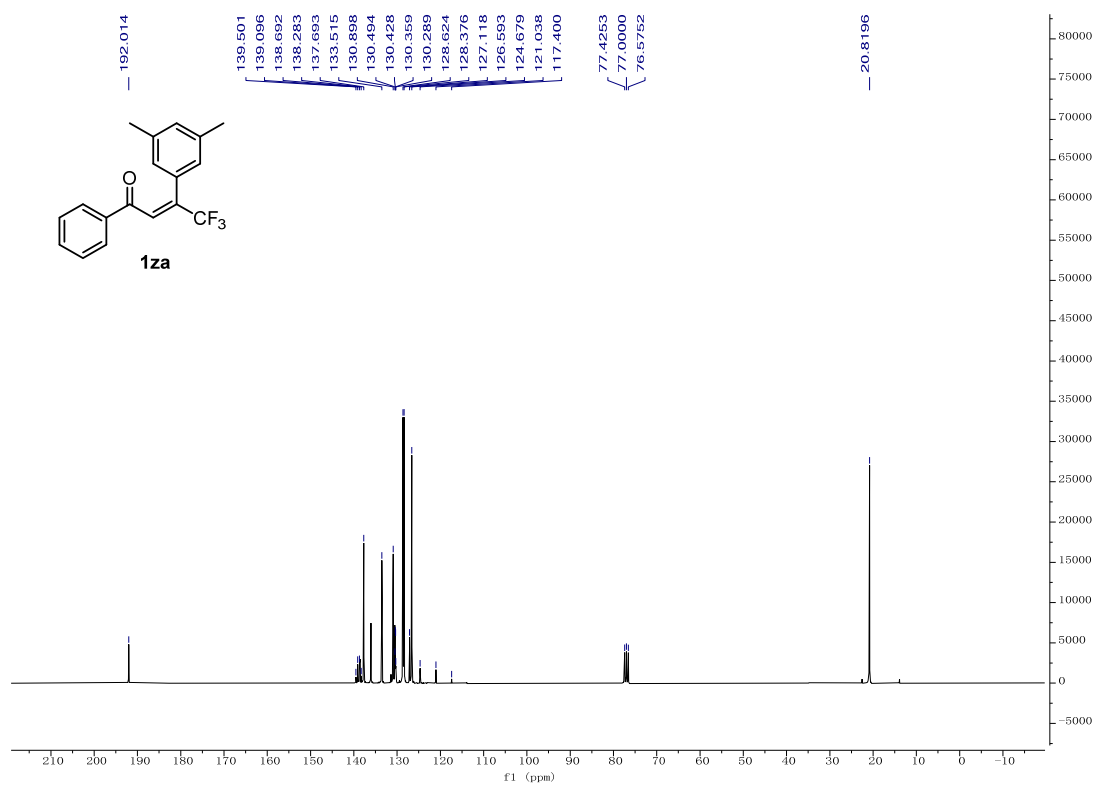

$^{19}\text{F}$  NMR (376 MHz,  $\text{CDCl}_3$ ) of compound **1za**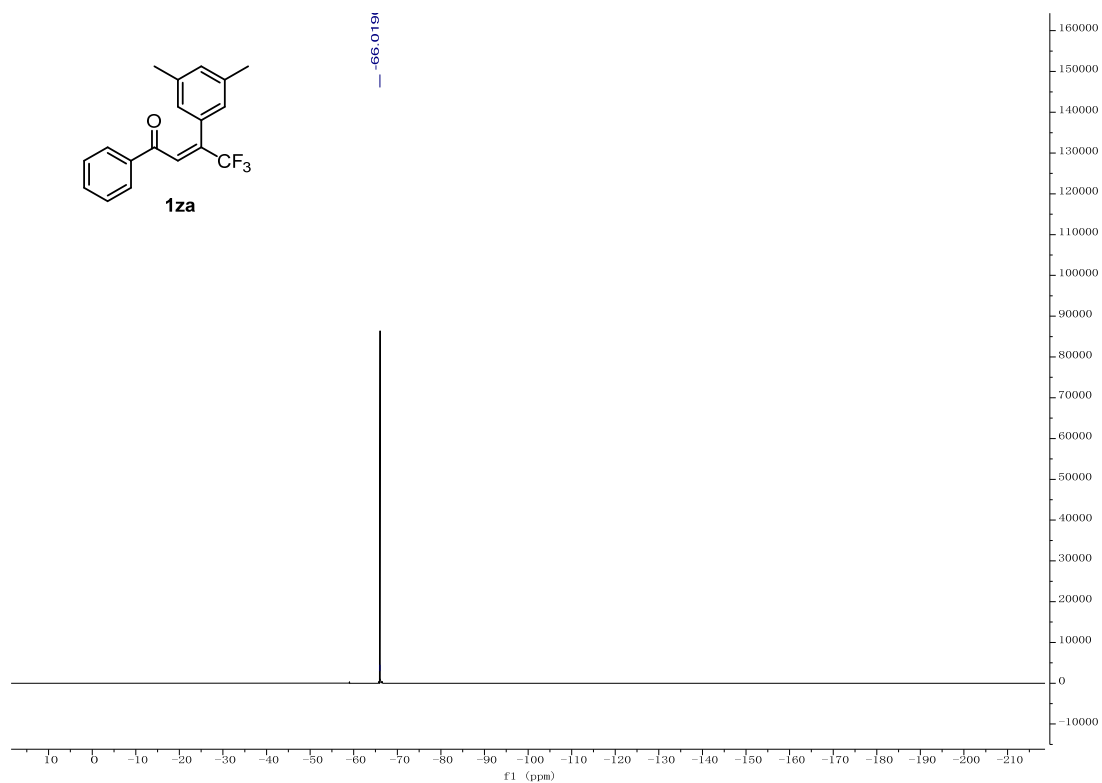 $^1\text{H}$  NMR (300 MHz,  $\text{CDCl}_3$ ) of compound **1zb**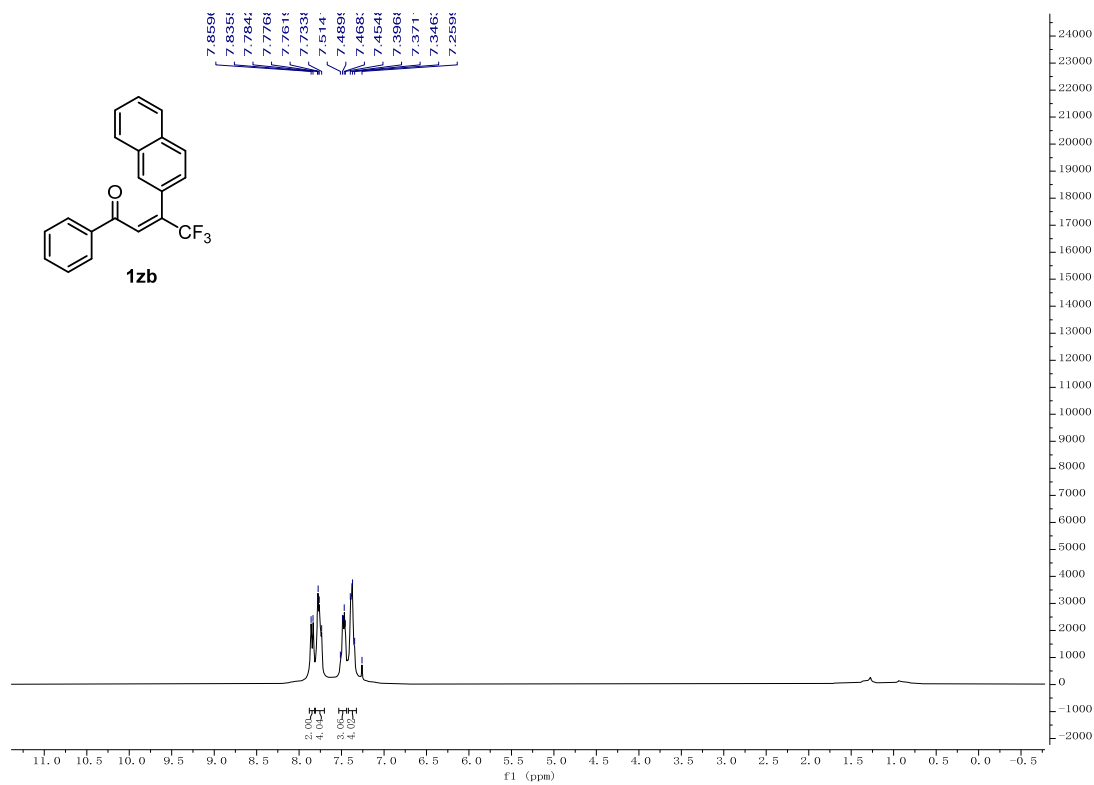

$^{13}\text{C}$  NMR (75 MHz,  $\text{CDCl}_3$ ) of compound **1zb**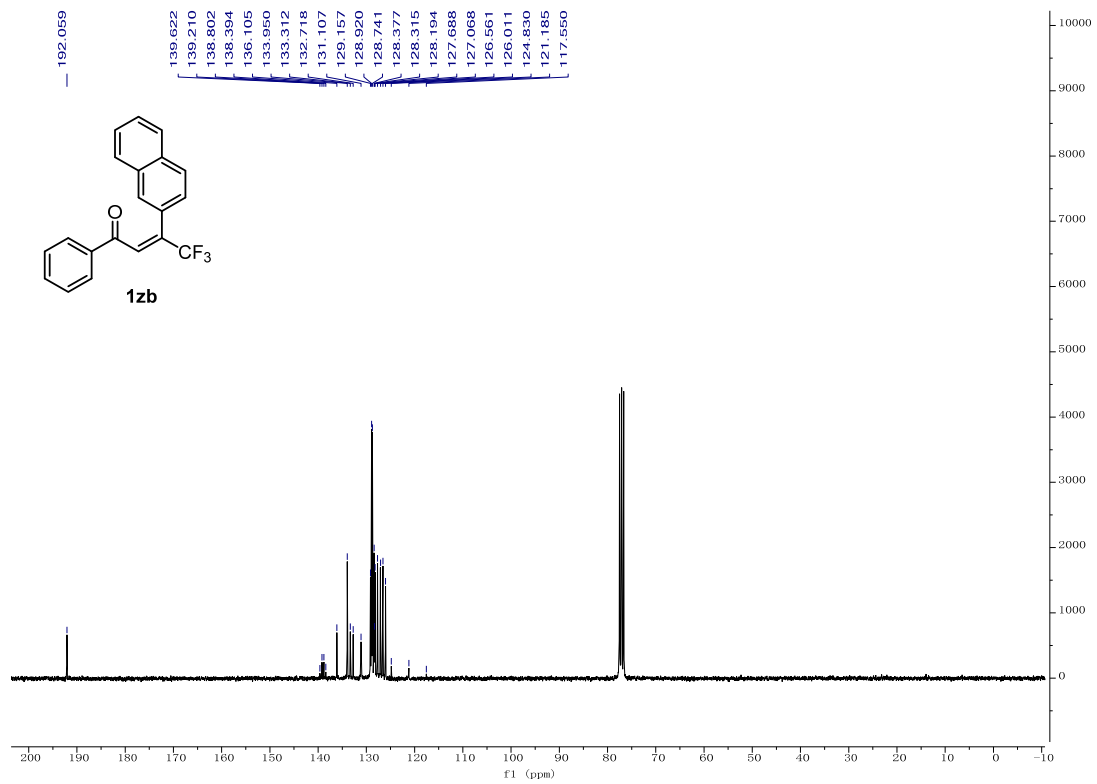 $^{19}\text{F}$  NMR (376 MHz,  $\text{CDCl}_3$ ) of compound **1zb**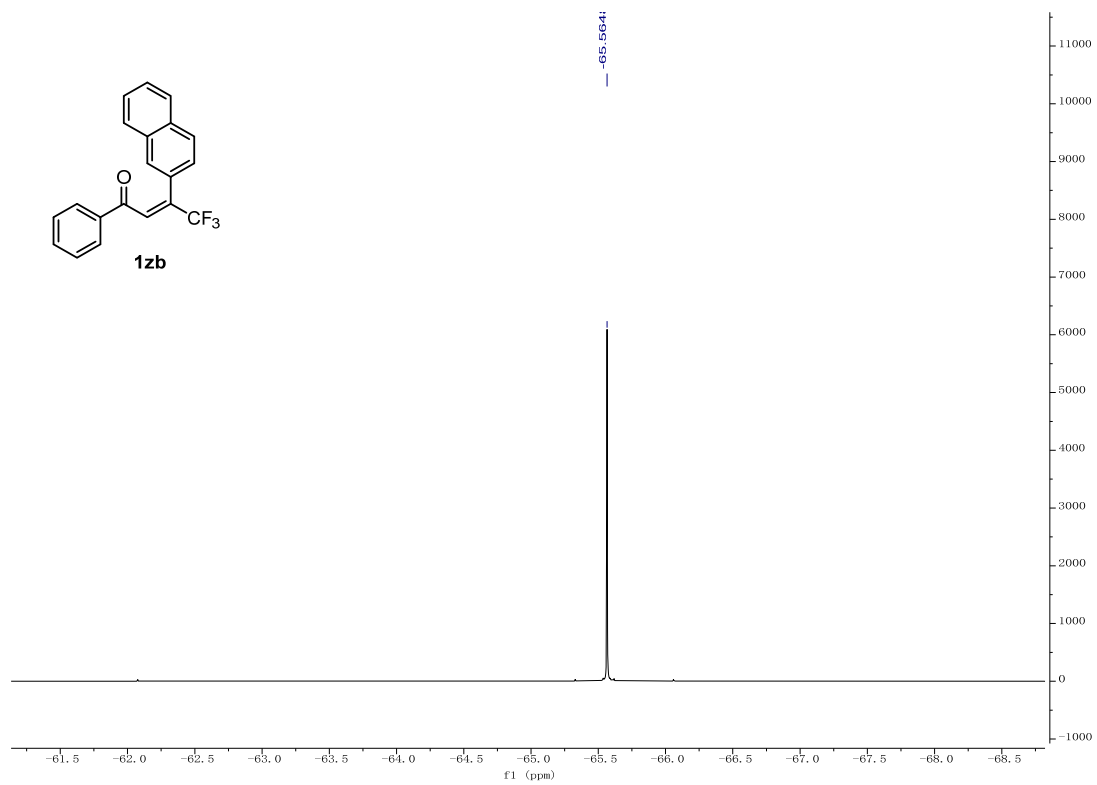

$^1\text{H}$  NMR (300 MHz,  $\text{CDCl}_3$ ) of compound **1zc**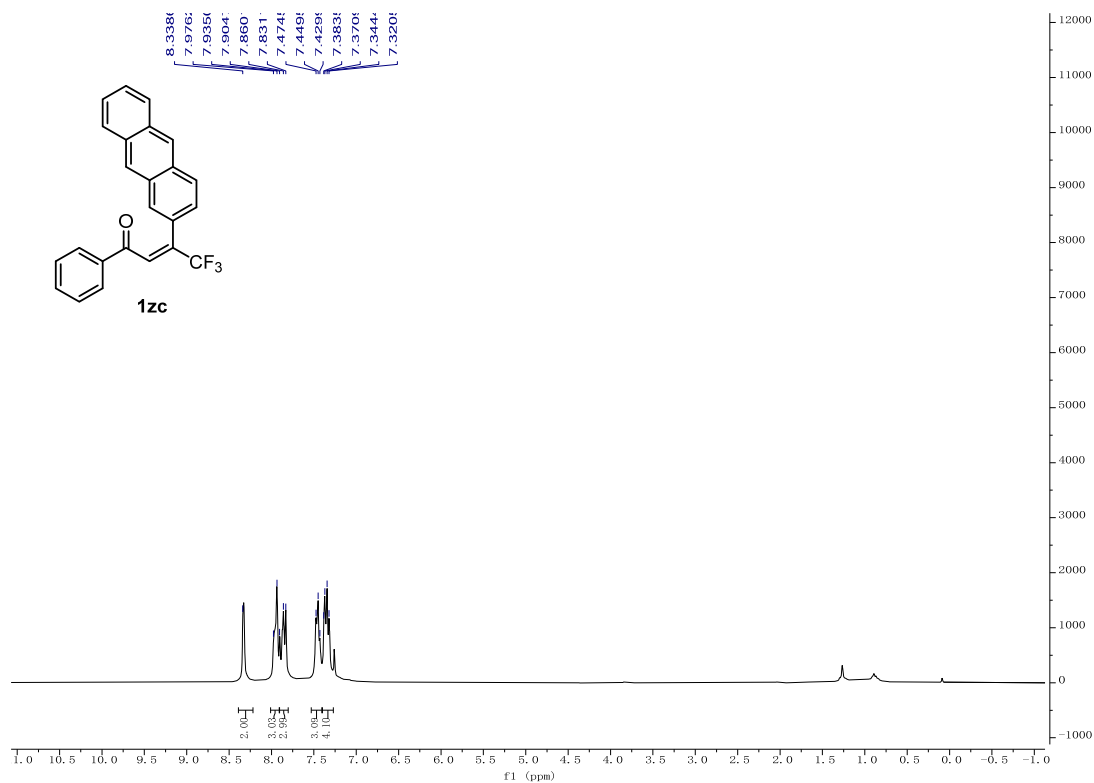 $^{13}\text{C}$  NMR (75 MHz,  $\text{CDCl}_3$ ) of compound **1zc**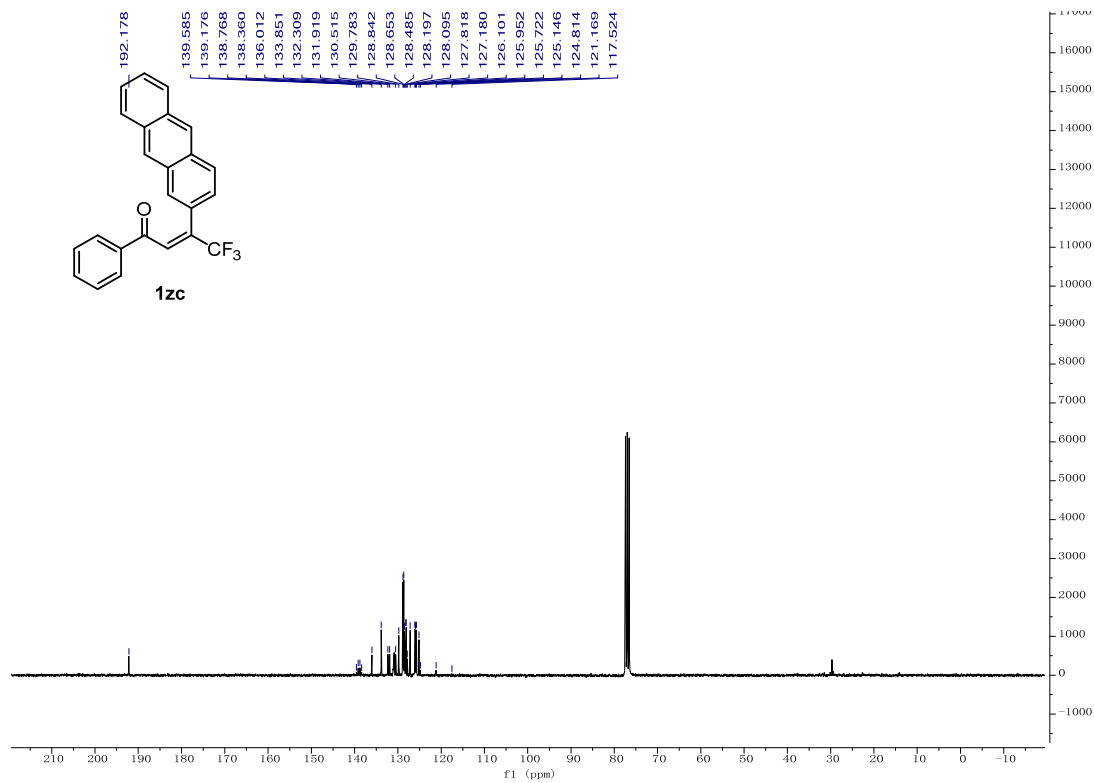

$^{19}\text{F}$  NMR (376 MHz,  $\text{CDCl}_3$ ) of compound **1zc**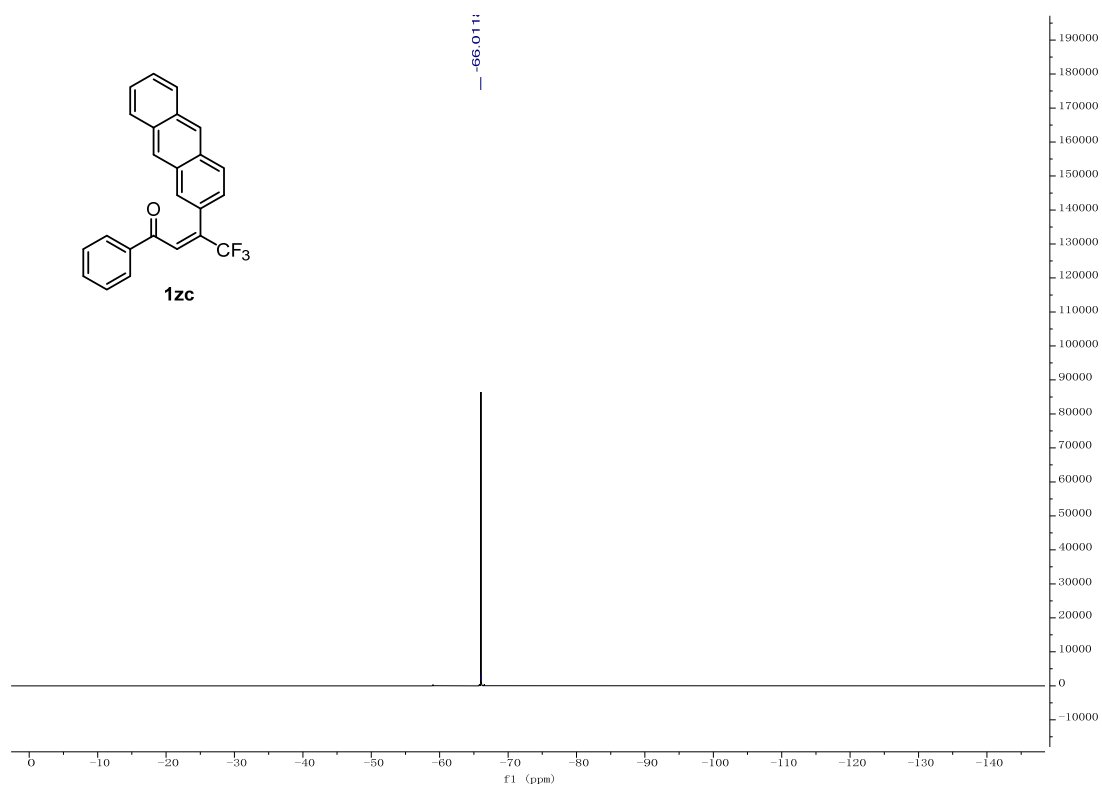 $^1\text{H}$  NMR (300 MHz,  $\text{CDCl}_3$ ) of compound **1zd**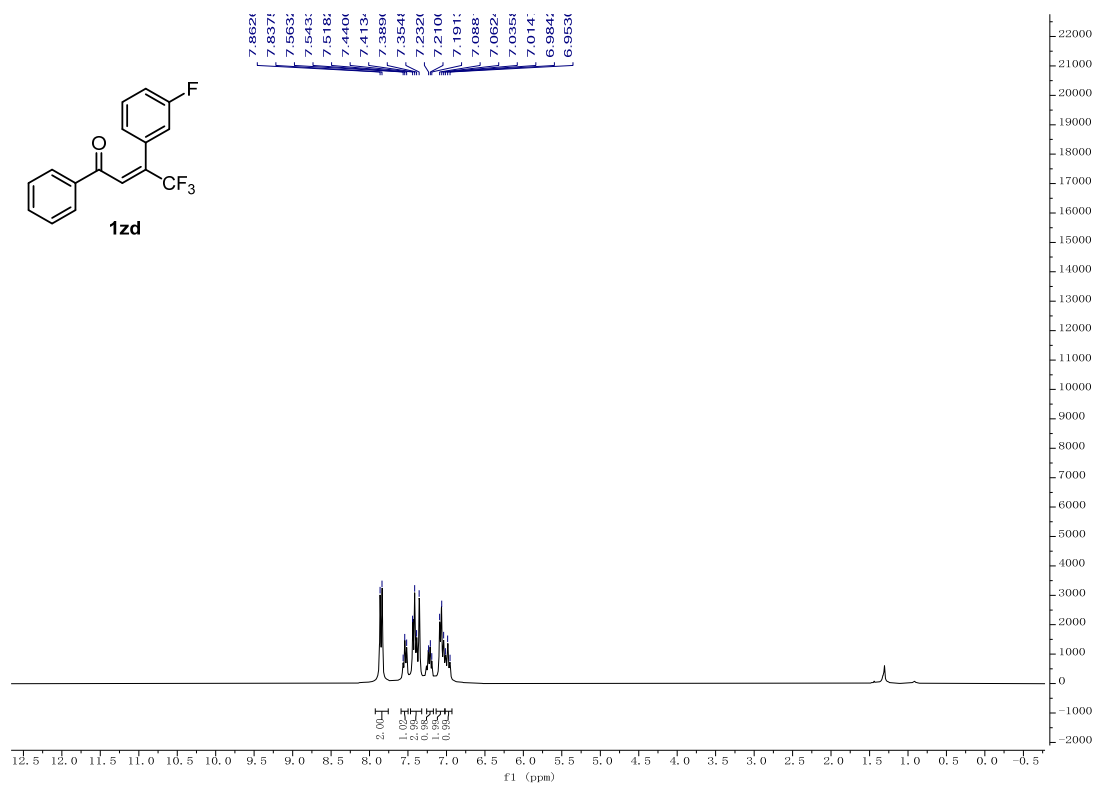

$^{13}\text{C}$  NMR (75 MHz,  $\text{CDCl}_3$ ) of compound **1zd**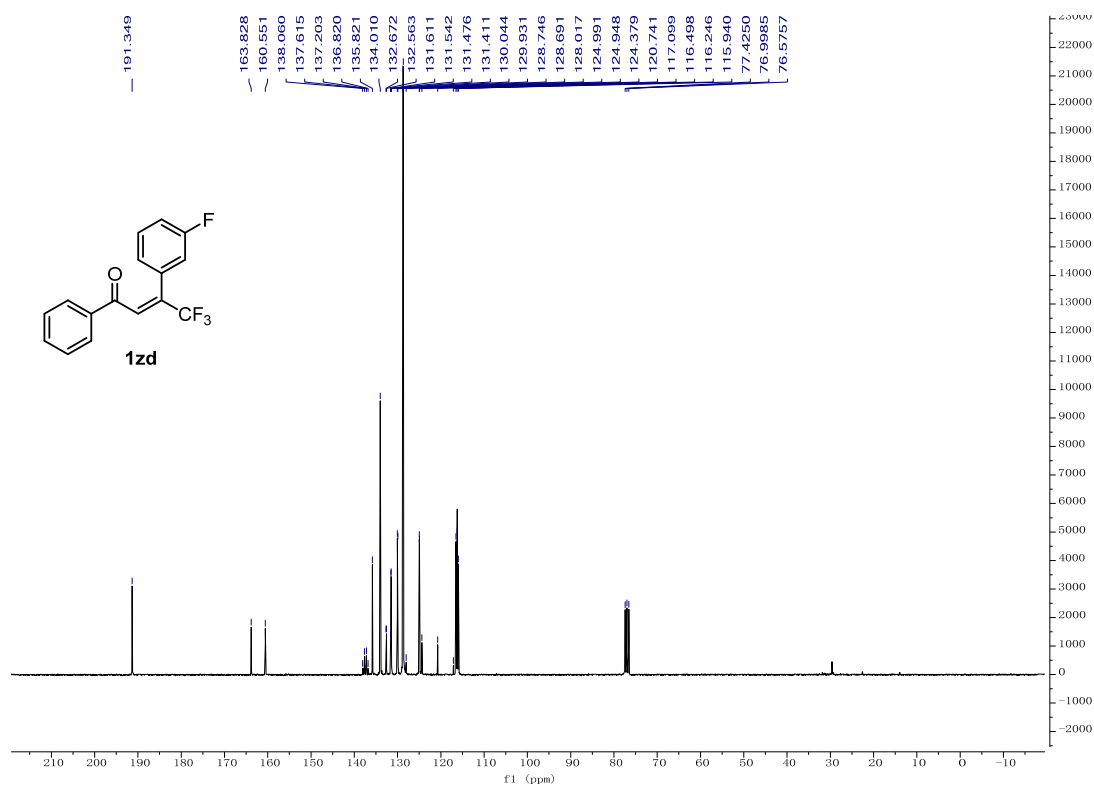 $^{19}\text{F}$  NMR (376 MHz,  $\text{CDCl}_3$ ) of compound **1zd**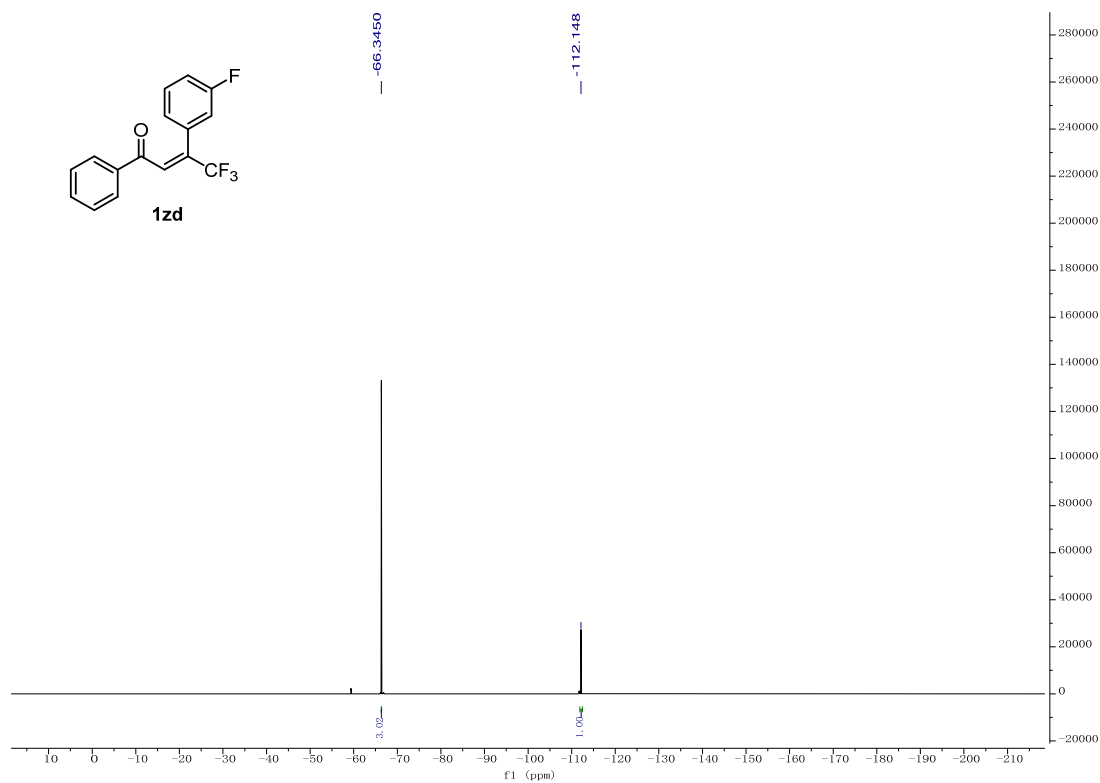

<sup>1</sup>H NMR (600 MHz, CDCl<sub>3</sub>) of compound **1ze**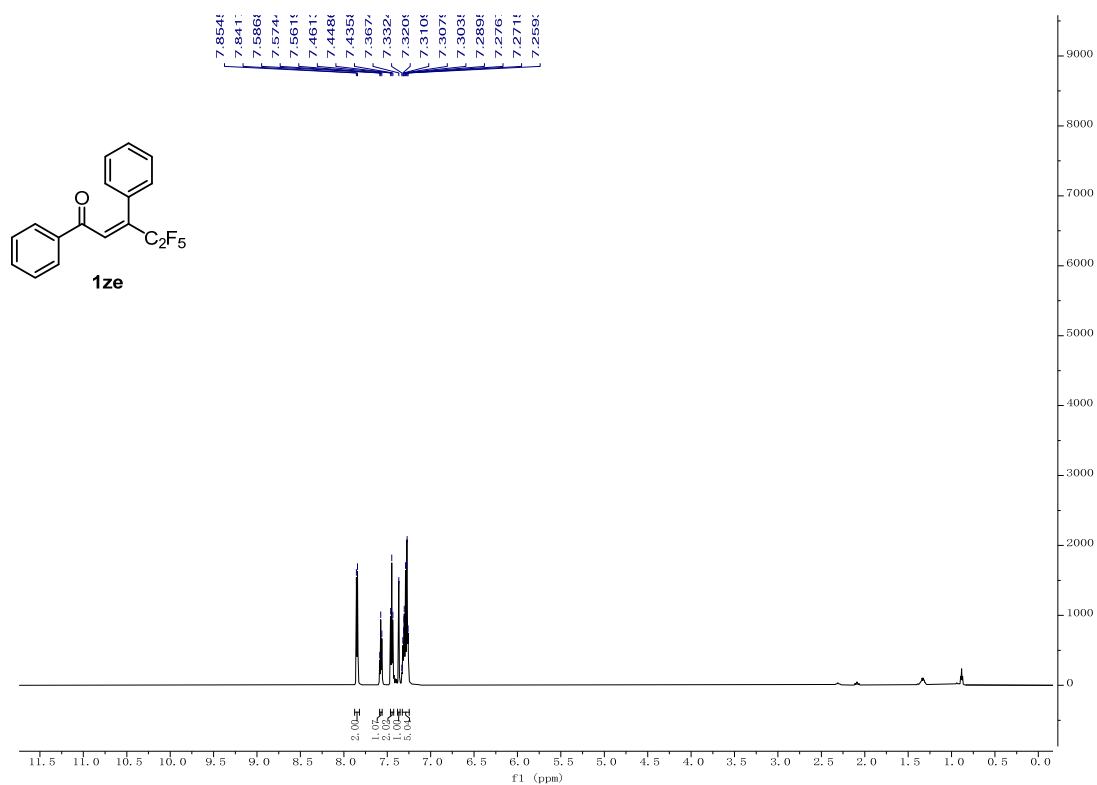<sup>13</sup>C NMR (151 MHz, CDCl<sub>3</sub>) of compound **1ze**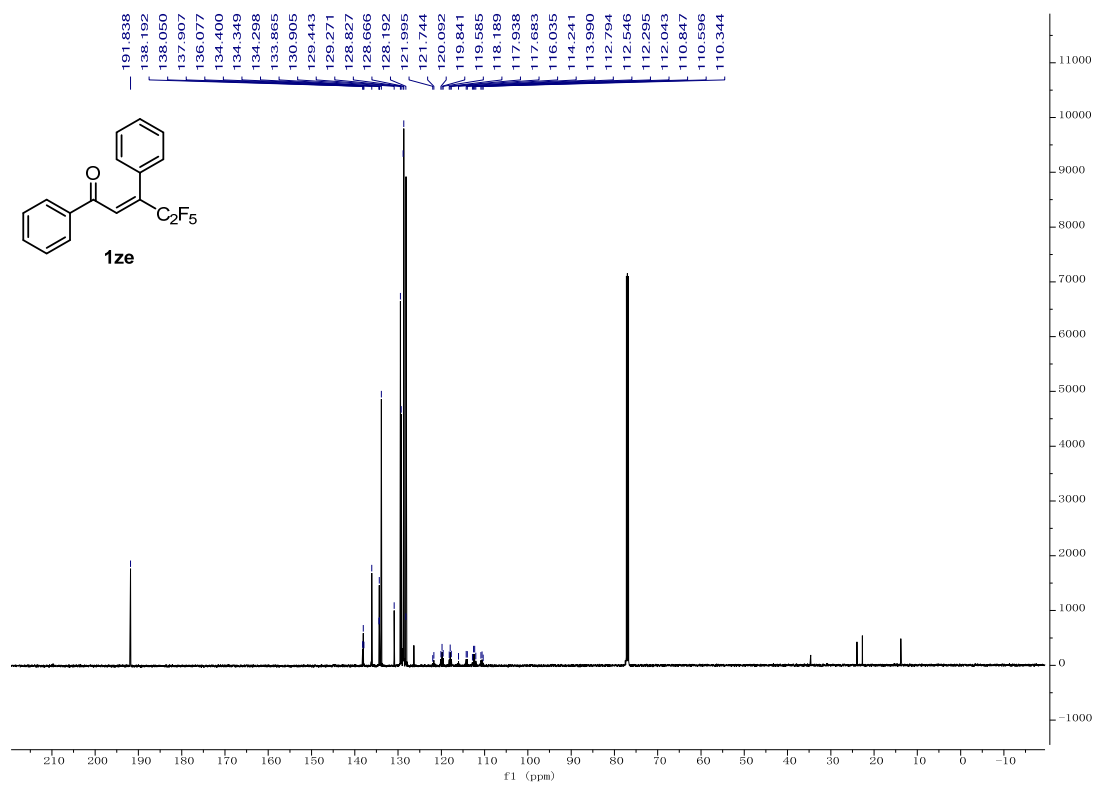

$^{19}\text{F}$  NMR (565 MHz,  $\text{CDCl}_3$ ) of compound **1ze**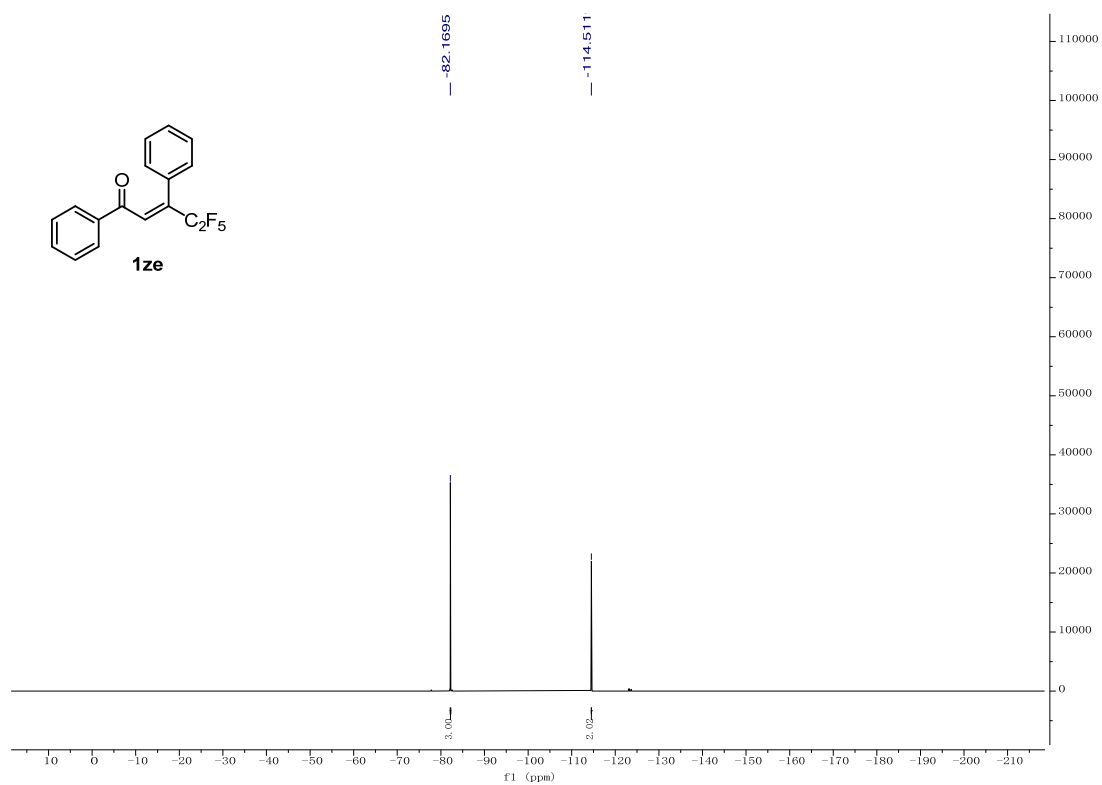 $^1\text{H}$  NMR (300 MHz,  $\text{CDCl}_3$ ) of compound **1zf**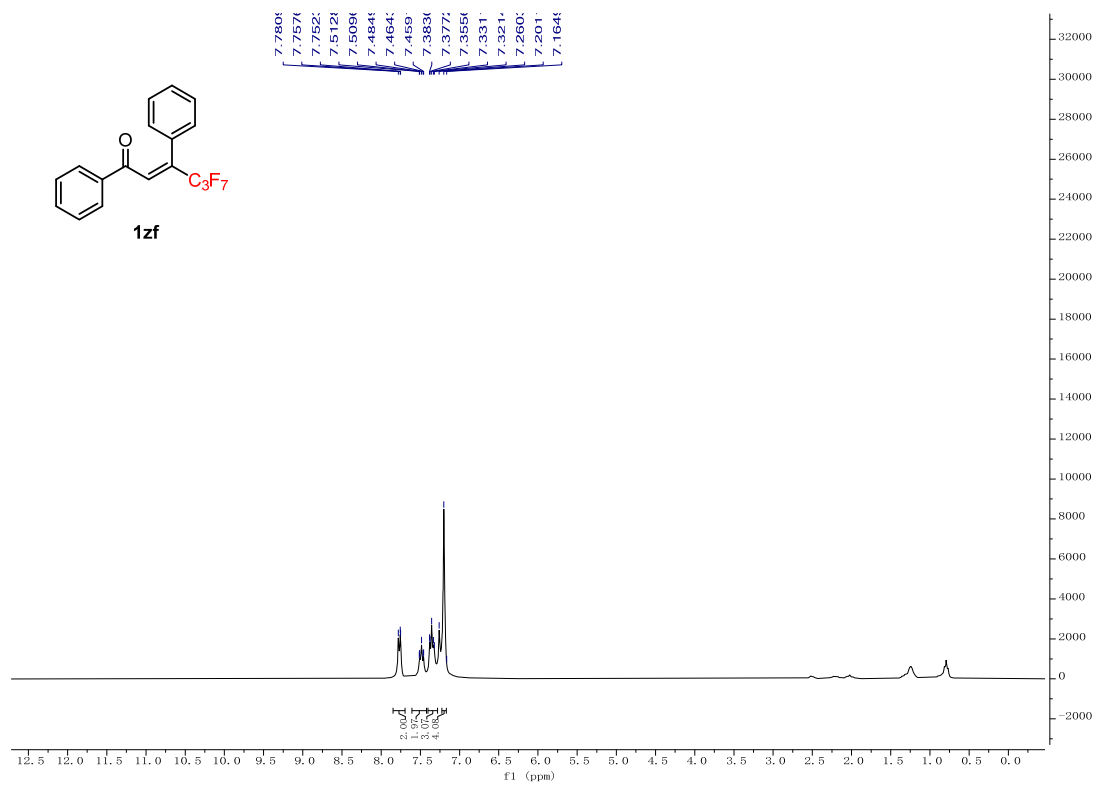



$^{13}\text{C}$  NMR (75 MHz,  $\text{CDCl}_3$ ) of compound **1zf**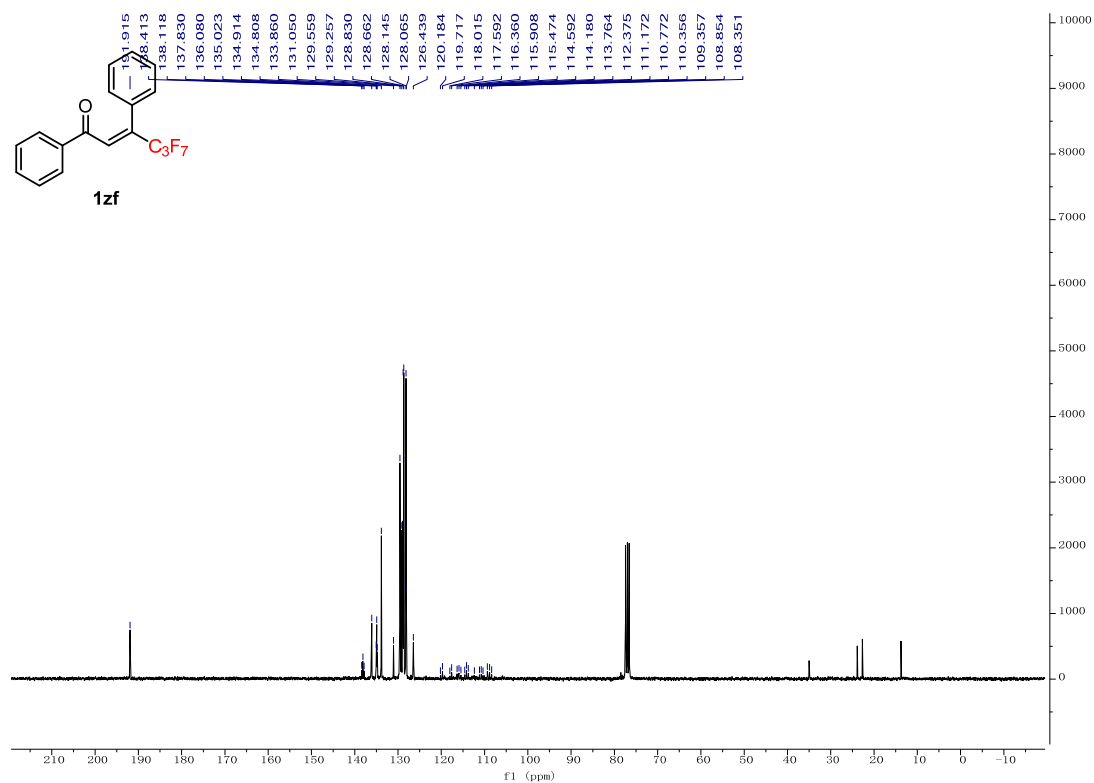 $^{19}\text{F}$  NMR (376 MHz,  $\text{CDCl}_3$ ) of compound **1zf**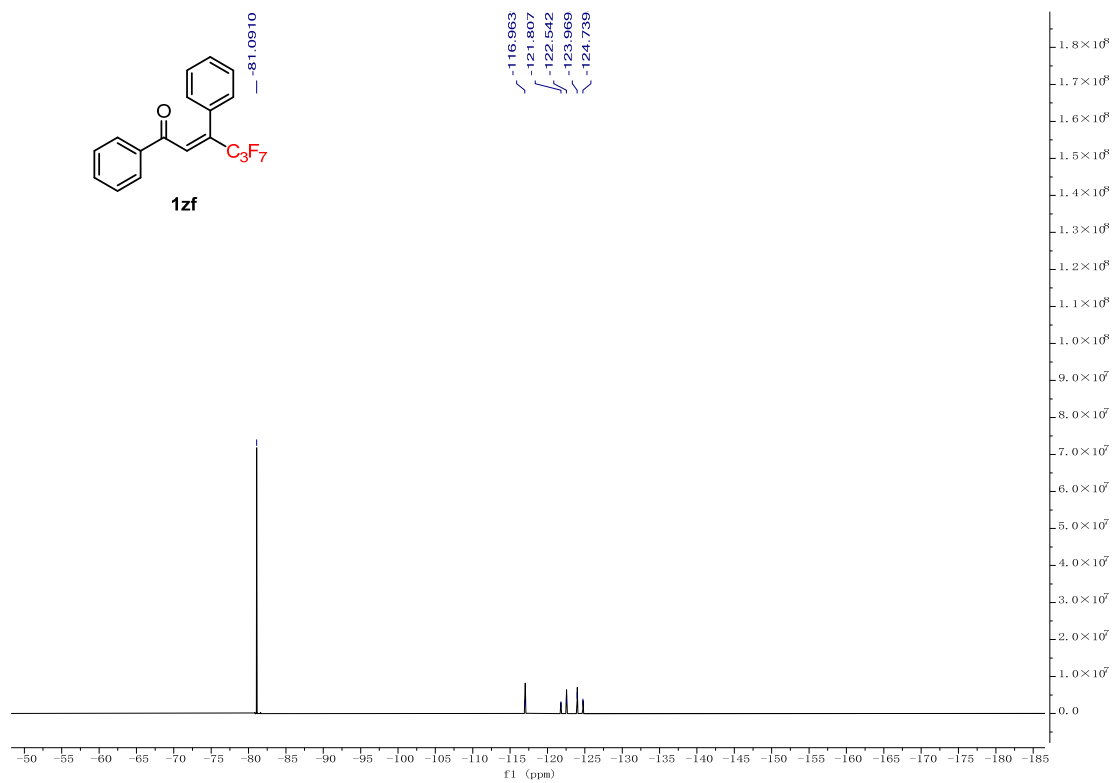

$^1\text{H}$  NMR (300 MHz,  $\text{CDCl}_3$ ) of compound **1zg**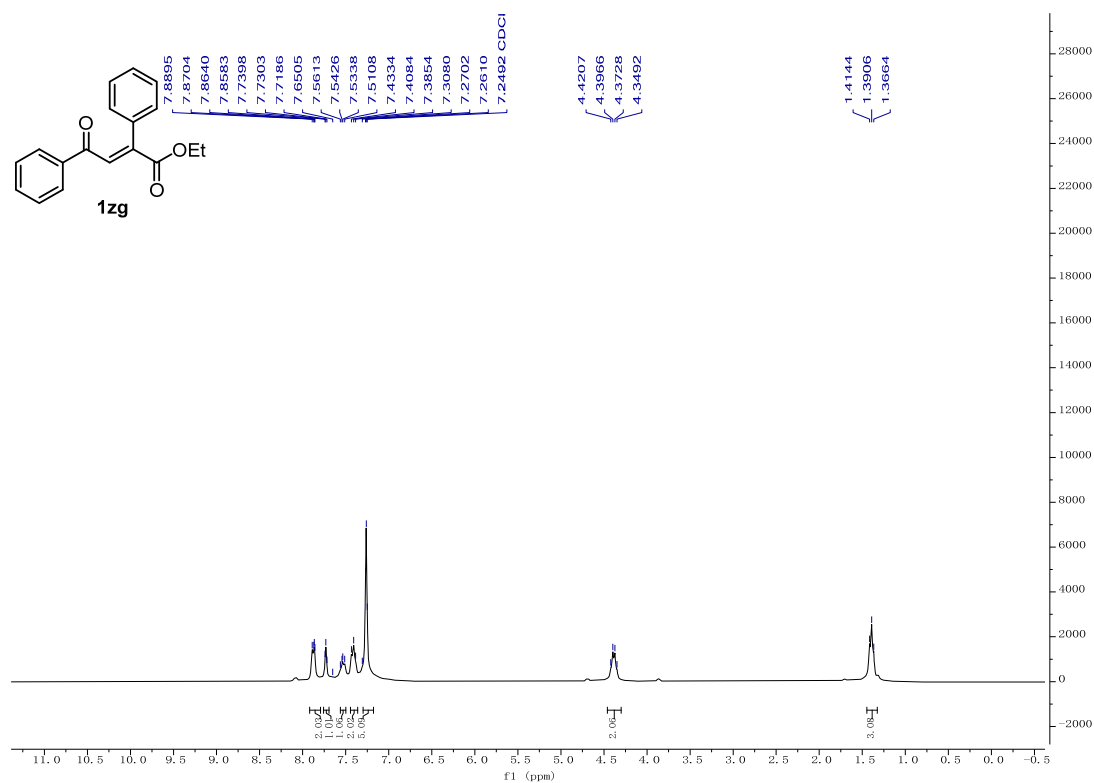 $^{13}\text{C}$  NMR (75 MHz,  $\text{CDCl}_3$ ) of compound **1zg**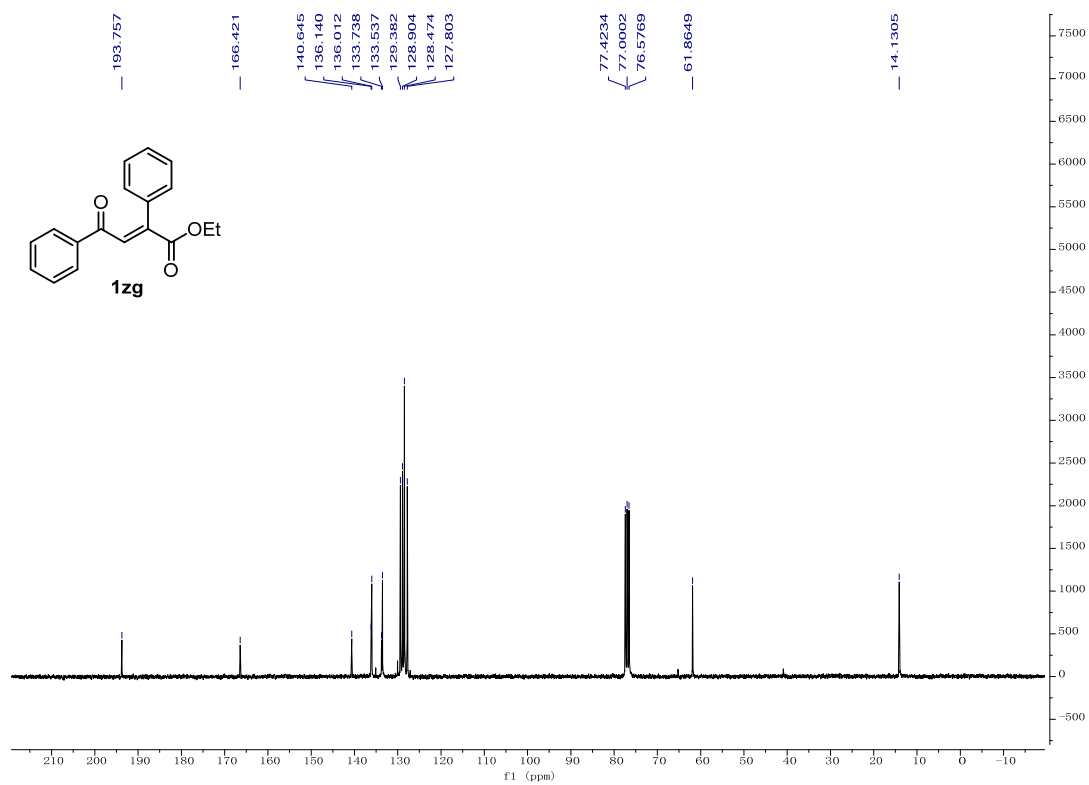

$^1\text{H}$  NMR (300 MHz,  $\text{CDCl}_3$ ) of compound **1zh**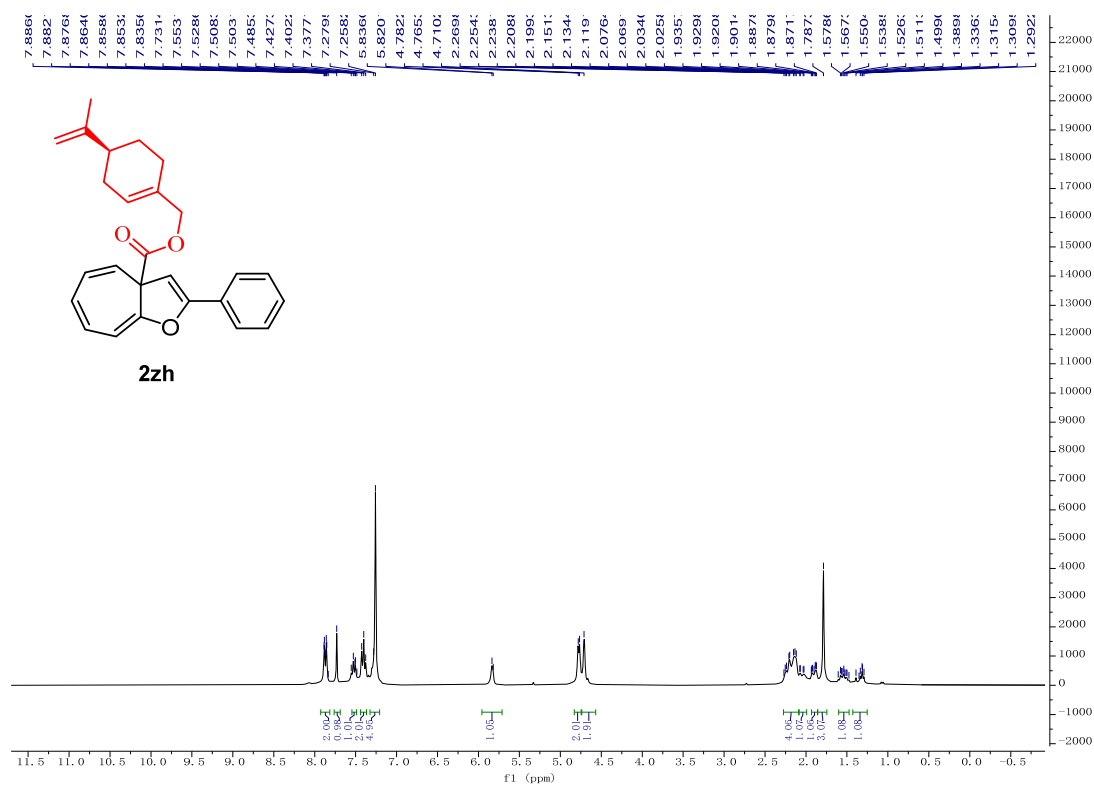 $^{13}\text{C}$  NMR (75 MHz,  $\text{CDCl}_3$ ) of compound **1zh**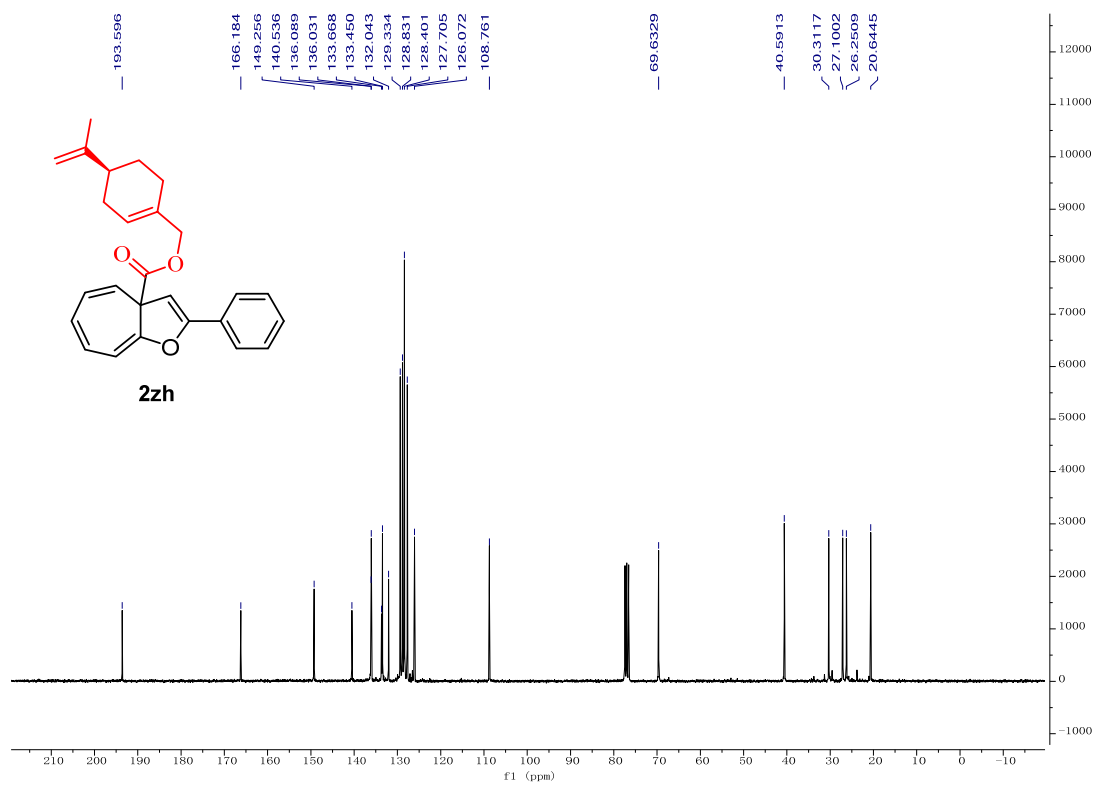

$^1\text{H}$  NMR (300 MHz,  $\text{CDCl}_3$ ) of compound **2zh**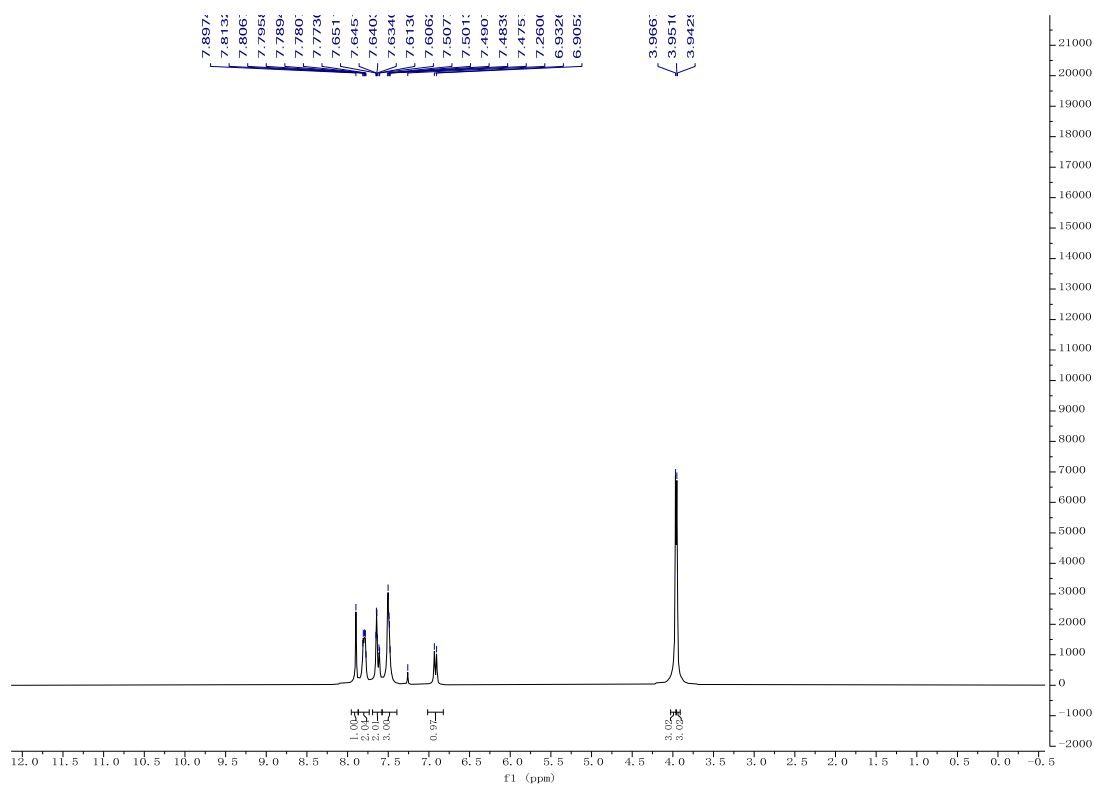 $^1\text{H}$  NMR (300 MHz,  $\text{CDCl}_3$ ) of compound **2zi**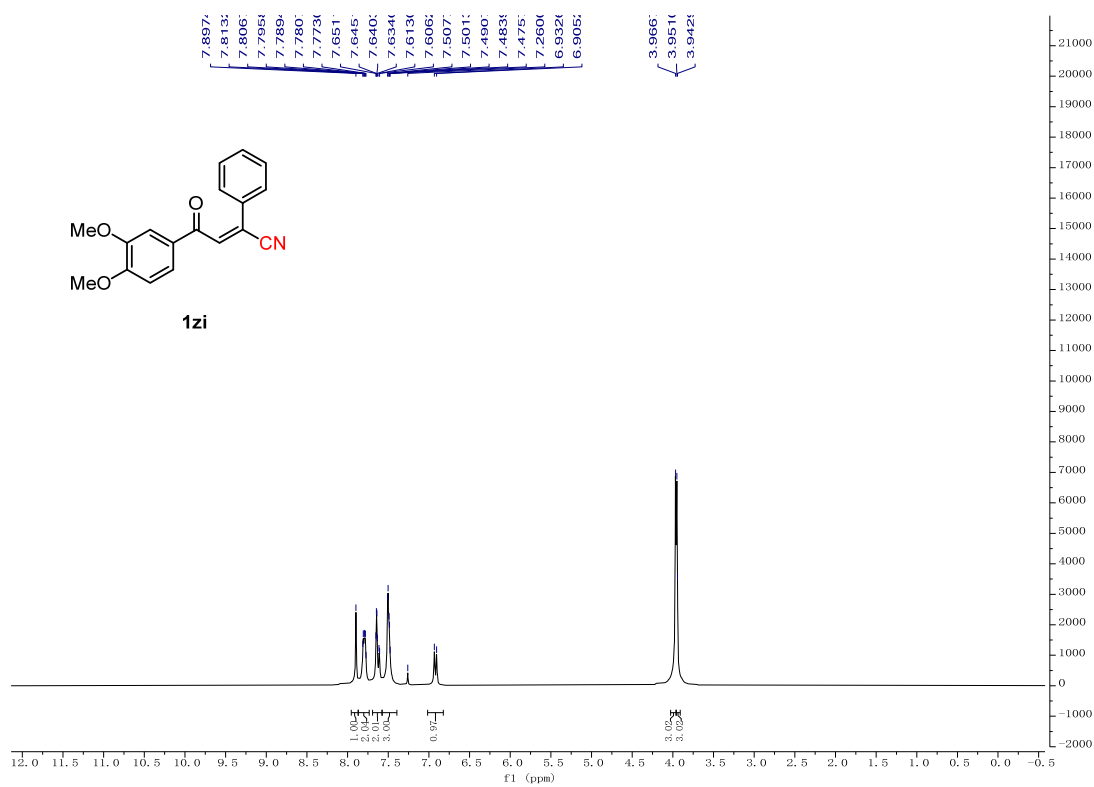

$^{13}\text{C}$  NMR (75 MHz,  $\text{CDCl}_3$ ) of compound **2zi**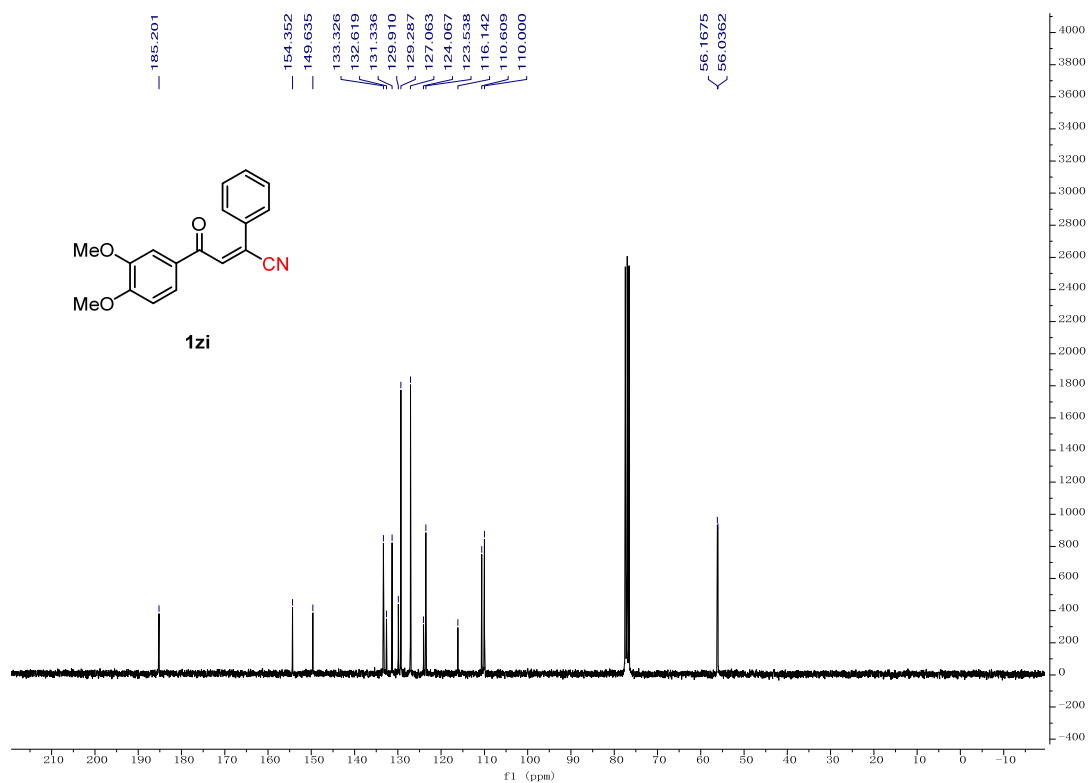 $^1\text{H}$  NMR (300 MHz,  $\text{CDCl}_3$ ) of compound **1zj**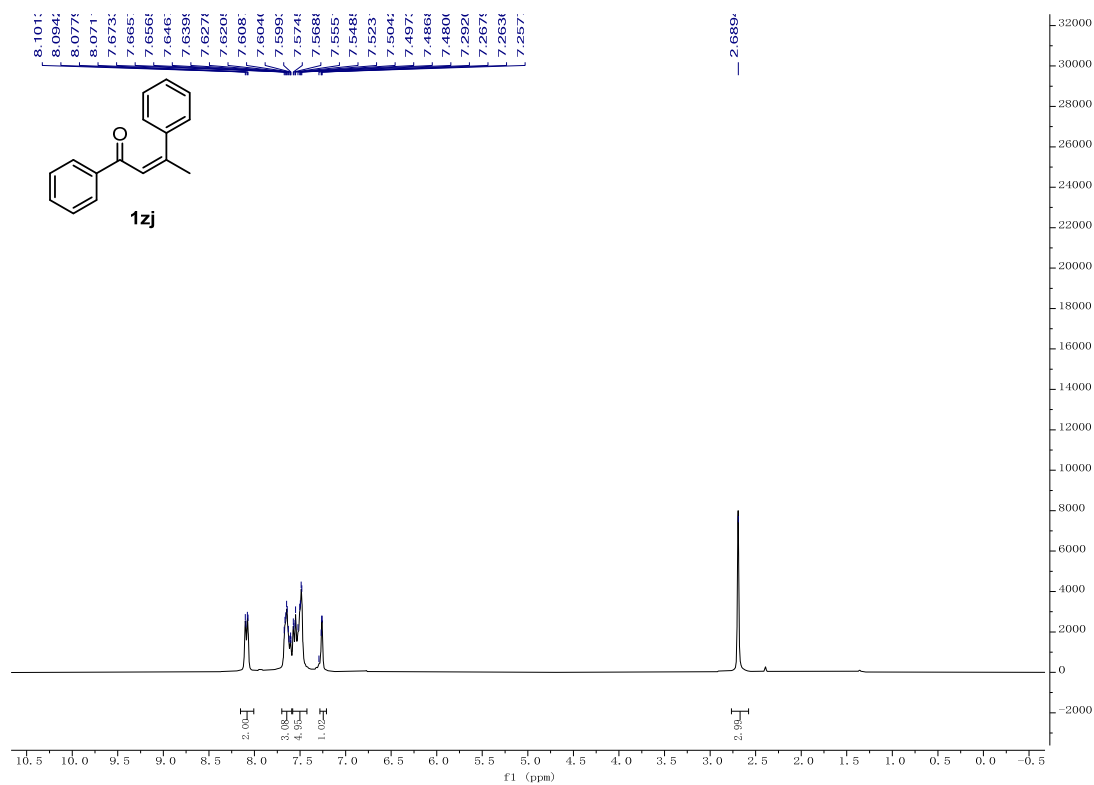

$^{13}\text{C}$  NMR (75 MHz,  $\text{CDCl}_3$ ) of compound **1zj**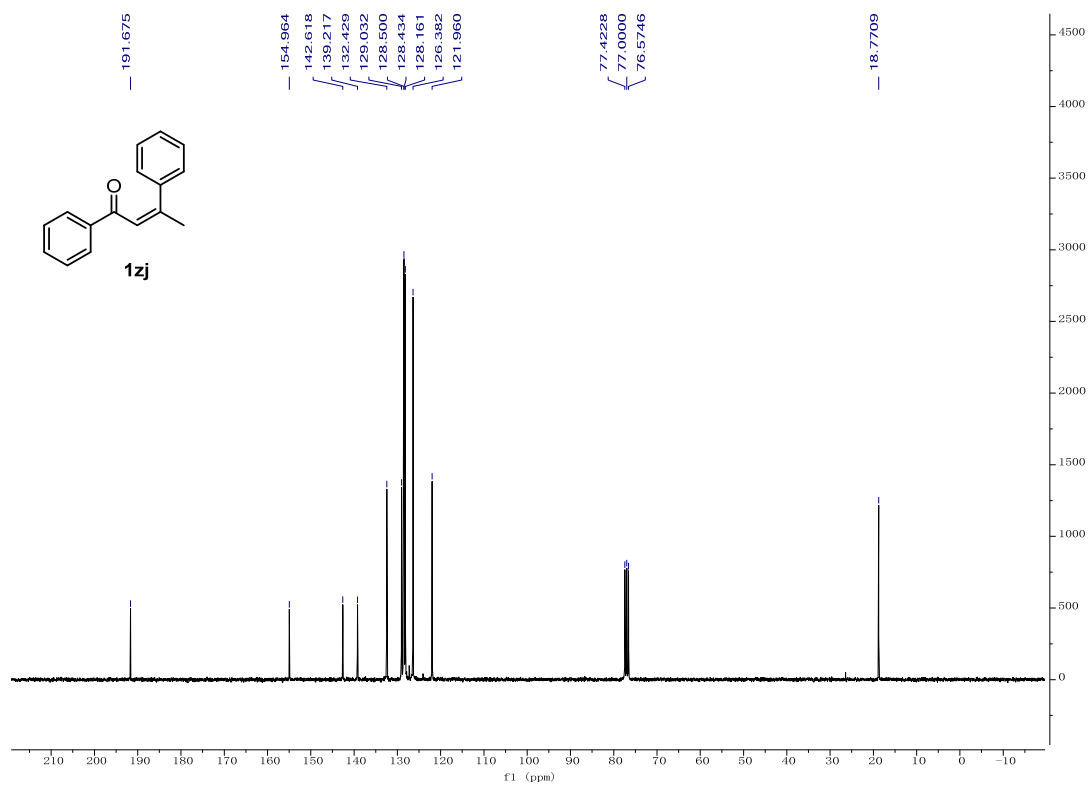 $^1\text{H}$  NMR (300 MHz,  $\text{CDCl}_3$ ) of compound **1zk**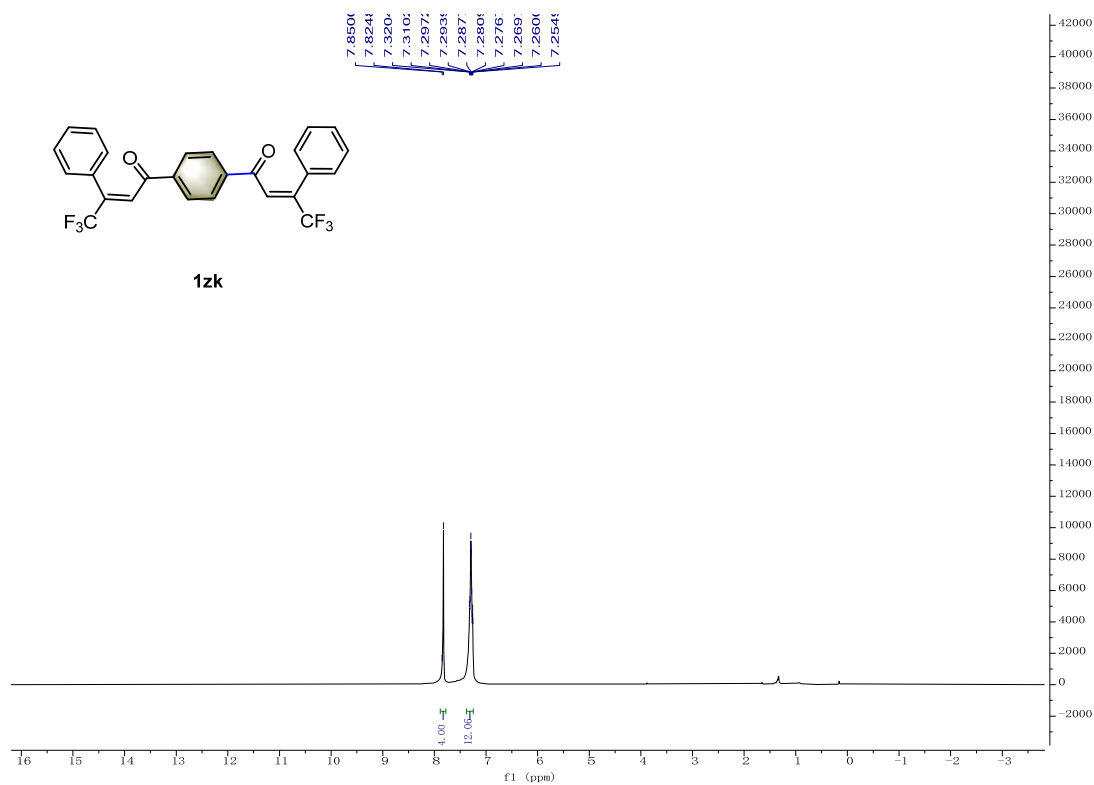

$^{13}\text{C}$  NMR (75 MHz,  $\text{CDCl}_3$ ) of compound **1zk**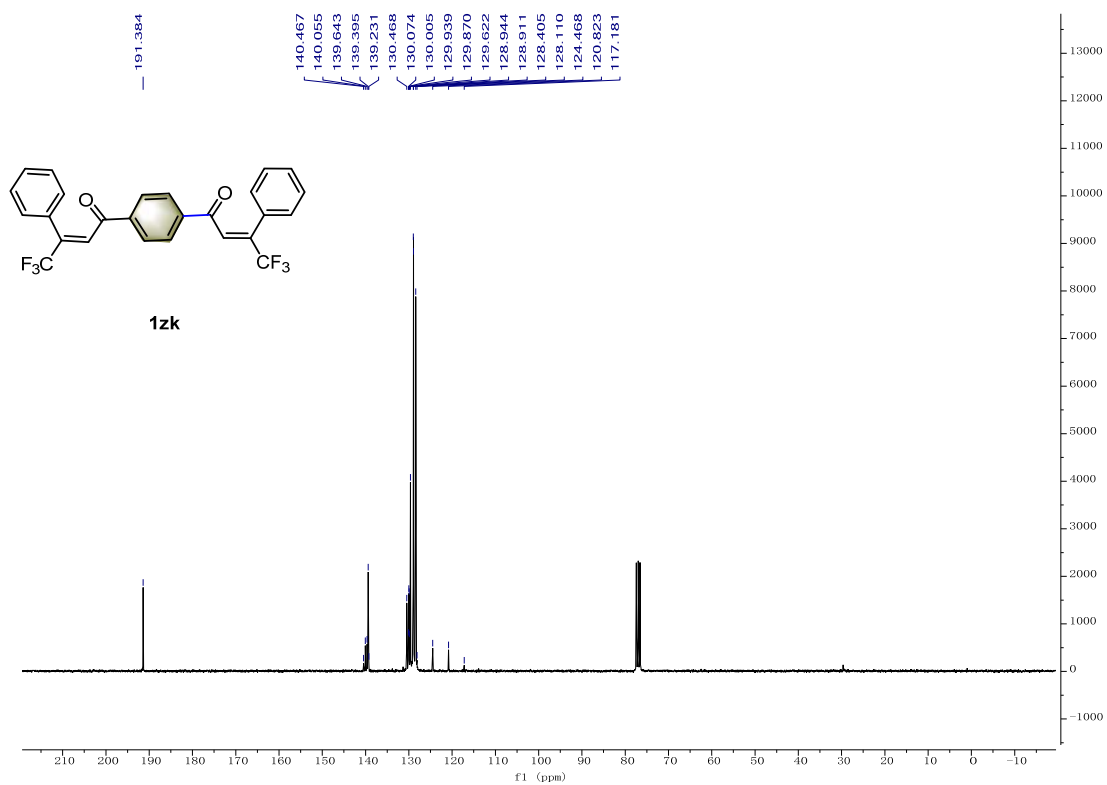 $^{19}\text{F}$  NMR (376 MHz,  $\text{CDCl}_3$ ) of compound **1zk**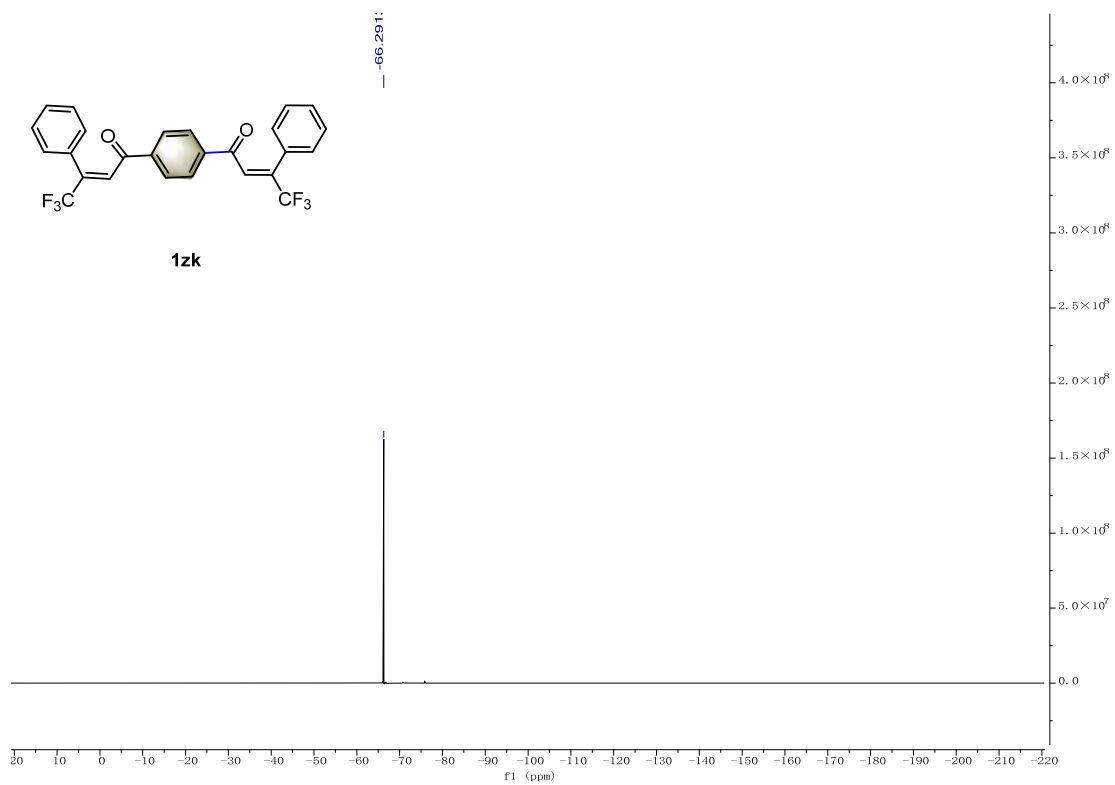

$^1\text{H}$  NMR (300 MHz,  $\text{CDCl}_3$ ) of compound **1zl**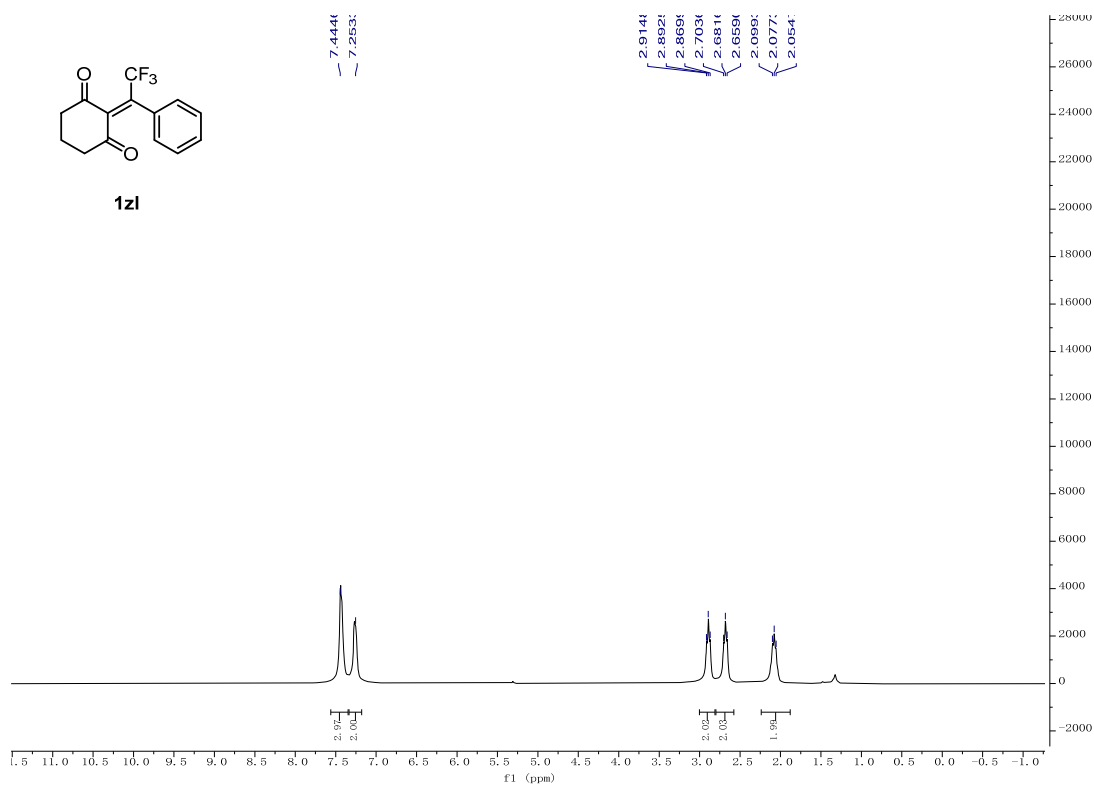 $^{13}\text{C}$  NMR (75 MHz,  $\text{CDCl}_3$ ) of compound **1zl**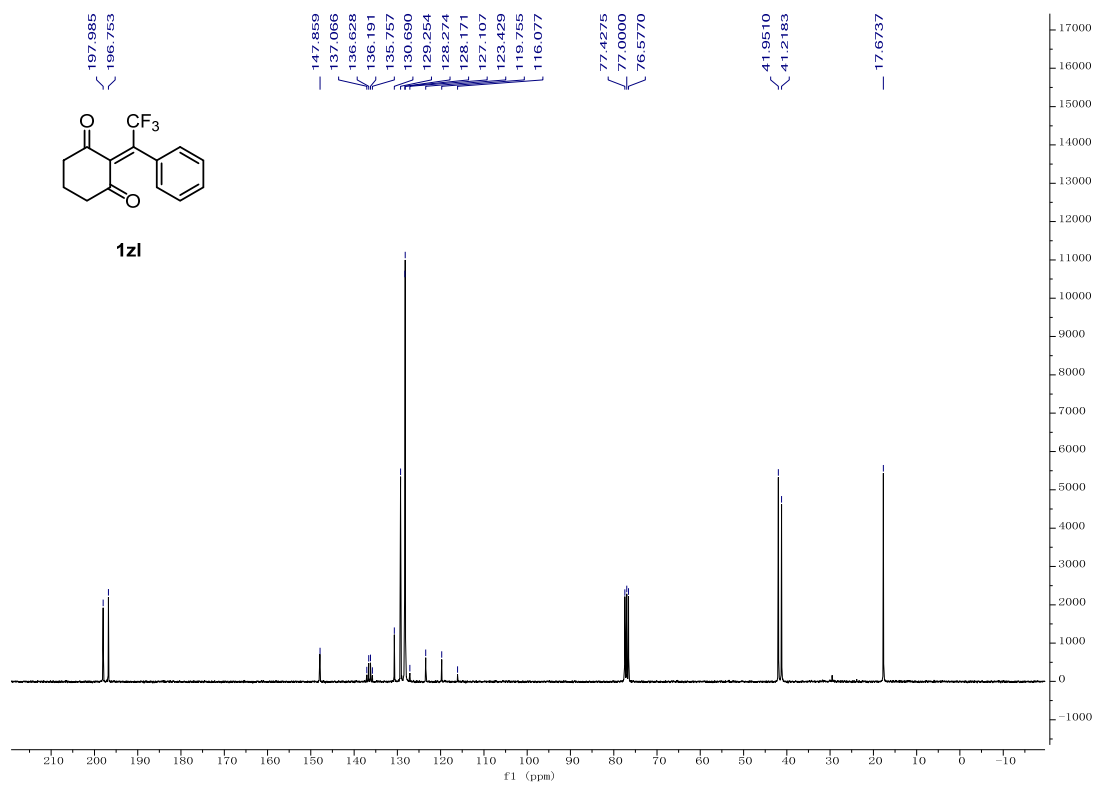



$^{19}\text{F}$  NMR (376 MHz,  $\text{CDCl}_3$ ) of compound **1zl**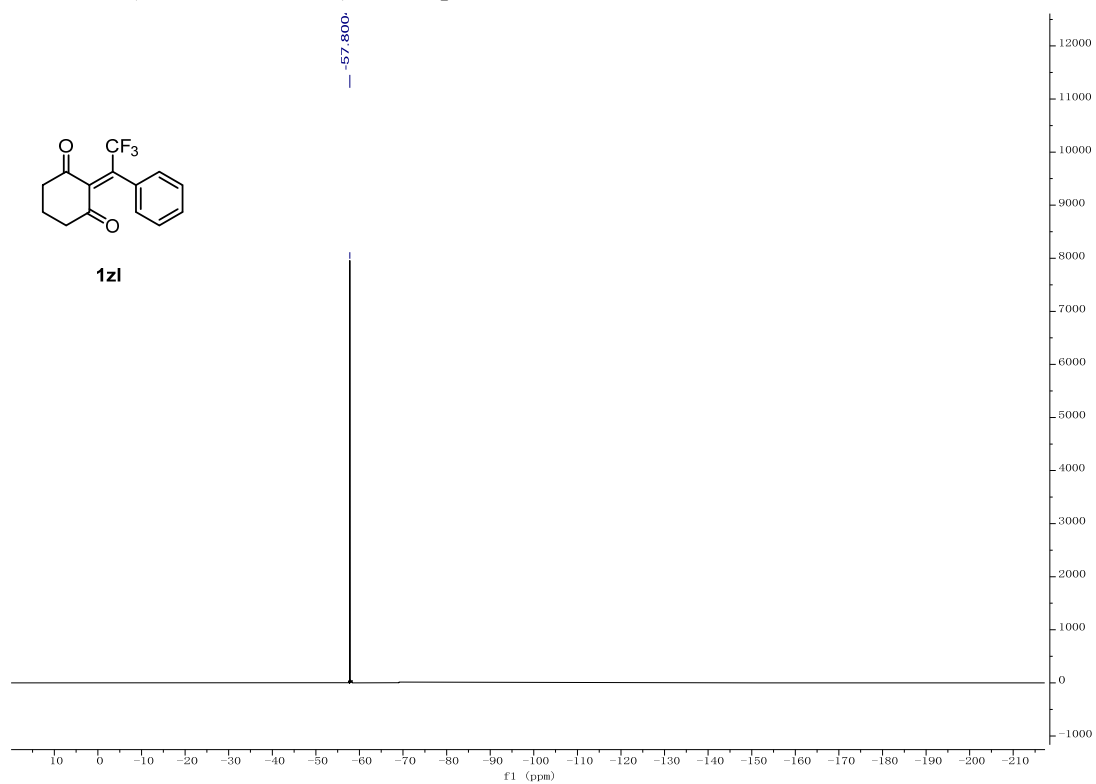 $^1\text{H}$  NMR (300 MHz,  $\text{CDCl}_3$ ) of compound **1zm**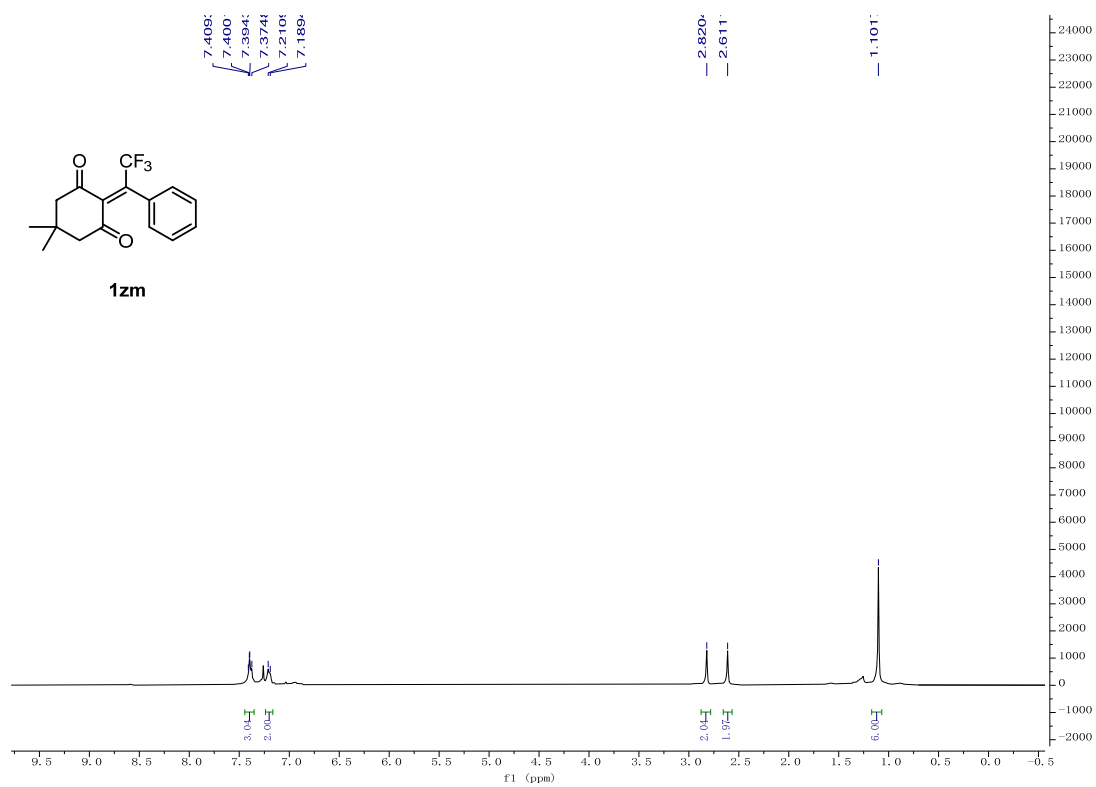

$^{13}\text{C}$  NMR (101 MHz,  $\text{CDCl}_3$ ) of compound **1zm**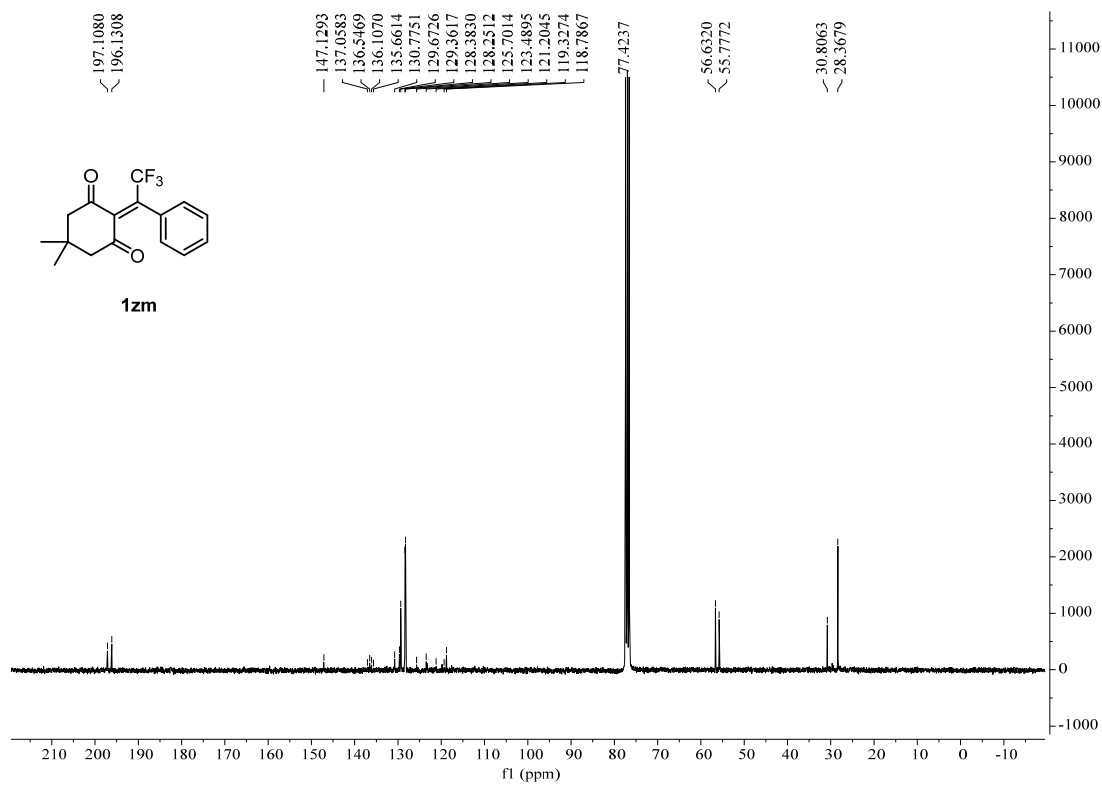 $^{19}\text{F}$  NMR (376 MHz,  $\text{CDCl}_3$ ) of compound **1zm**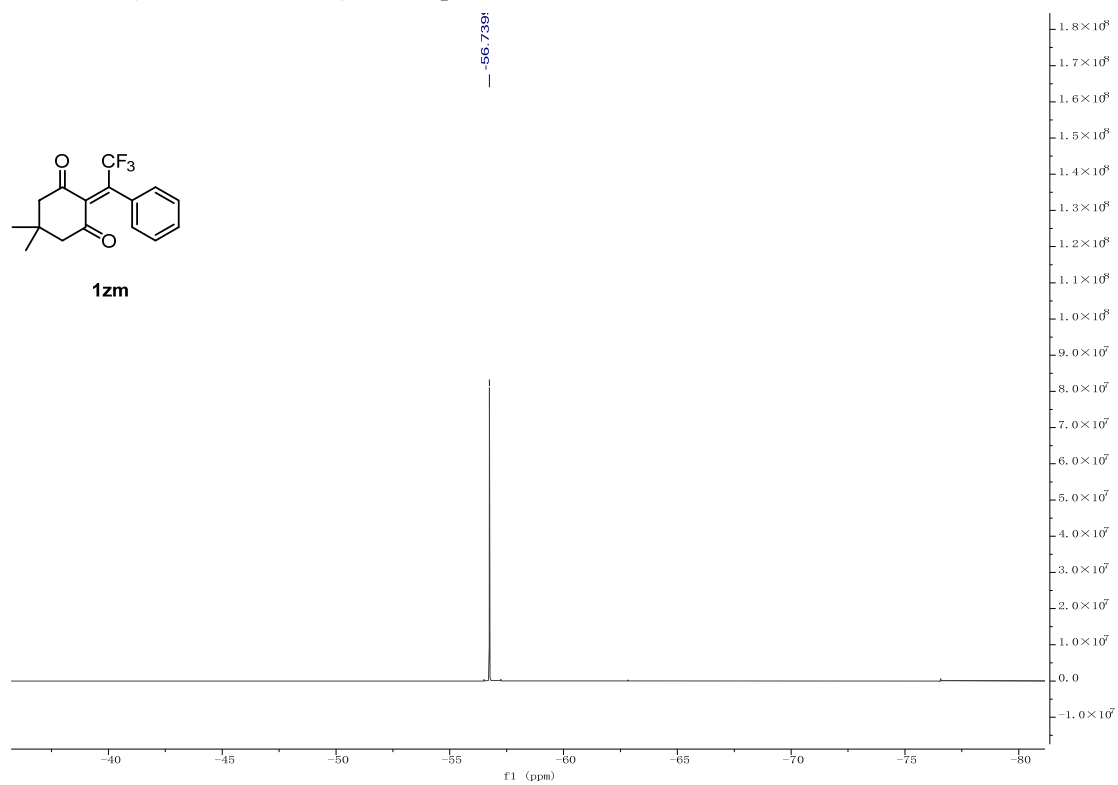

$^1\text{H}$  NMR (400 MHz,  $\text{CDCl}_3$ ) of compound **1zn**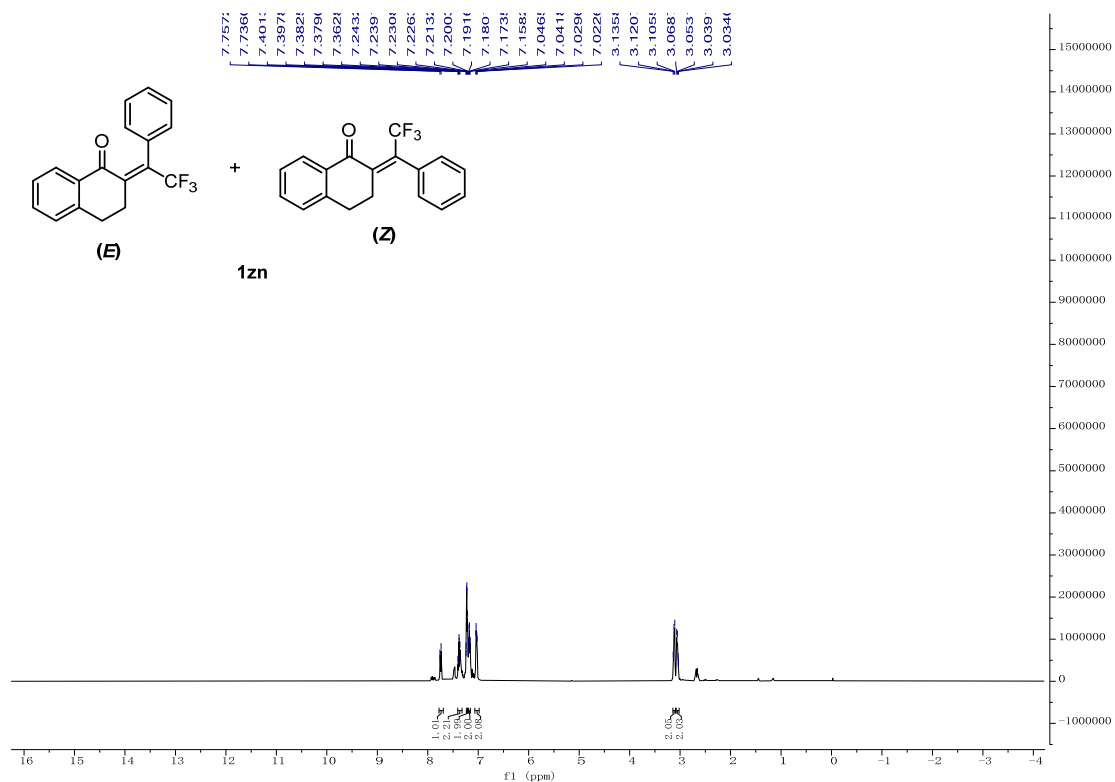 $^{13}\text{C}$  NMR (101 MHz,  $\text{CDCl}_3$ ) of compound **1zn**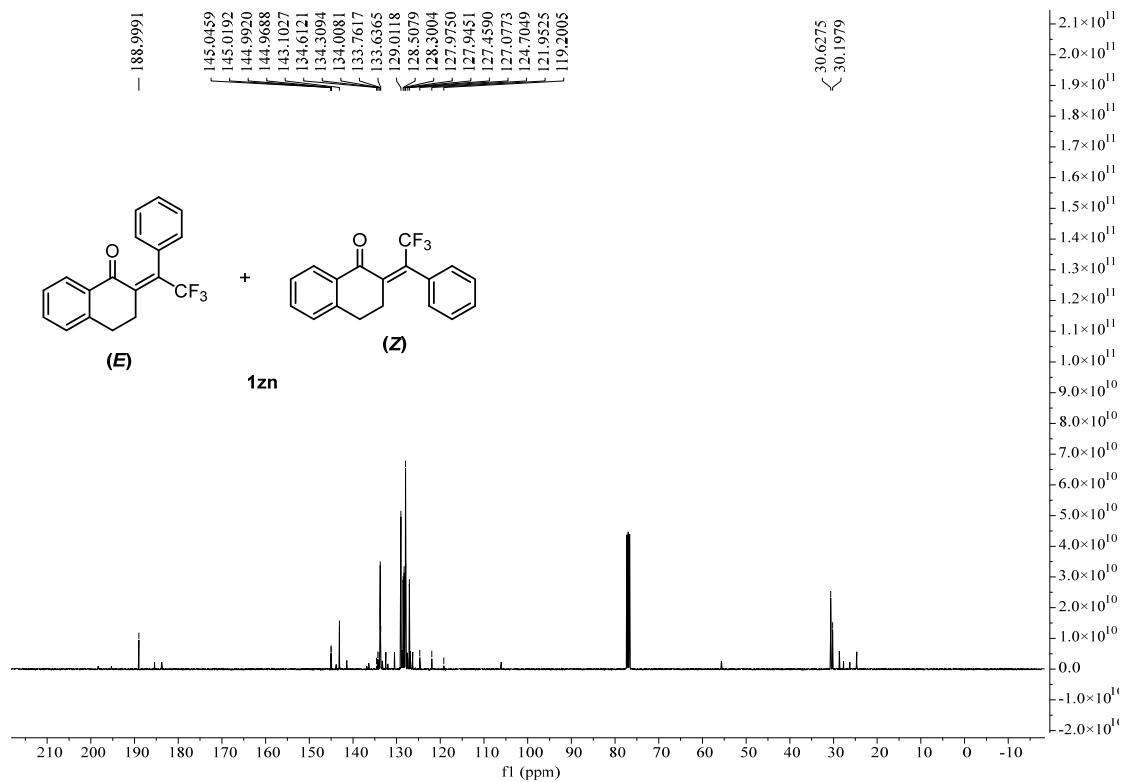

$^{19}\text{F}$  NMR (376 MHz,  $\text{CDCl}_3$ ) of compound **1zn**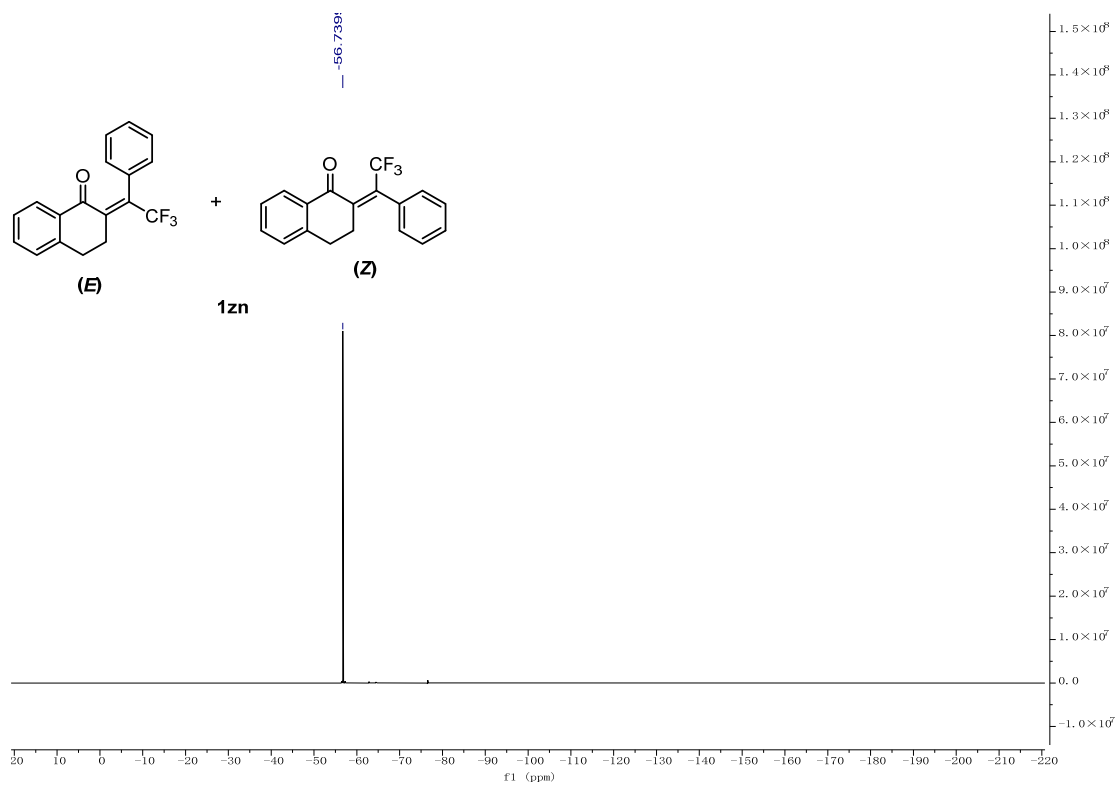 $^1\text{H}$  NMR (300 MHz,  $\text{CDCl}_3$ ) of compound **3a**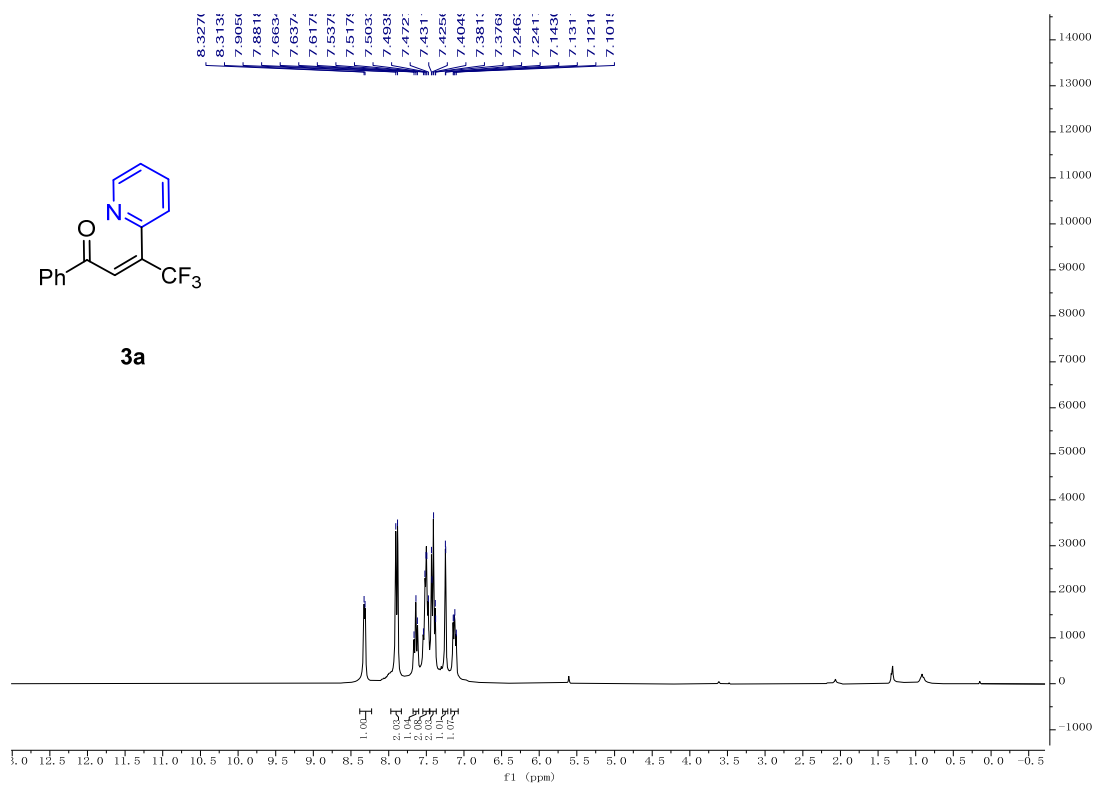

$^{13}\text{C}$  NMR (75 MHz,  $\text{CDCl}_3$ ) of compound **3a**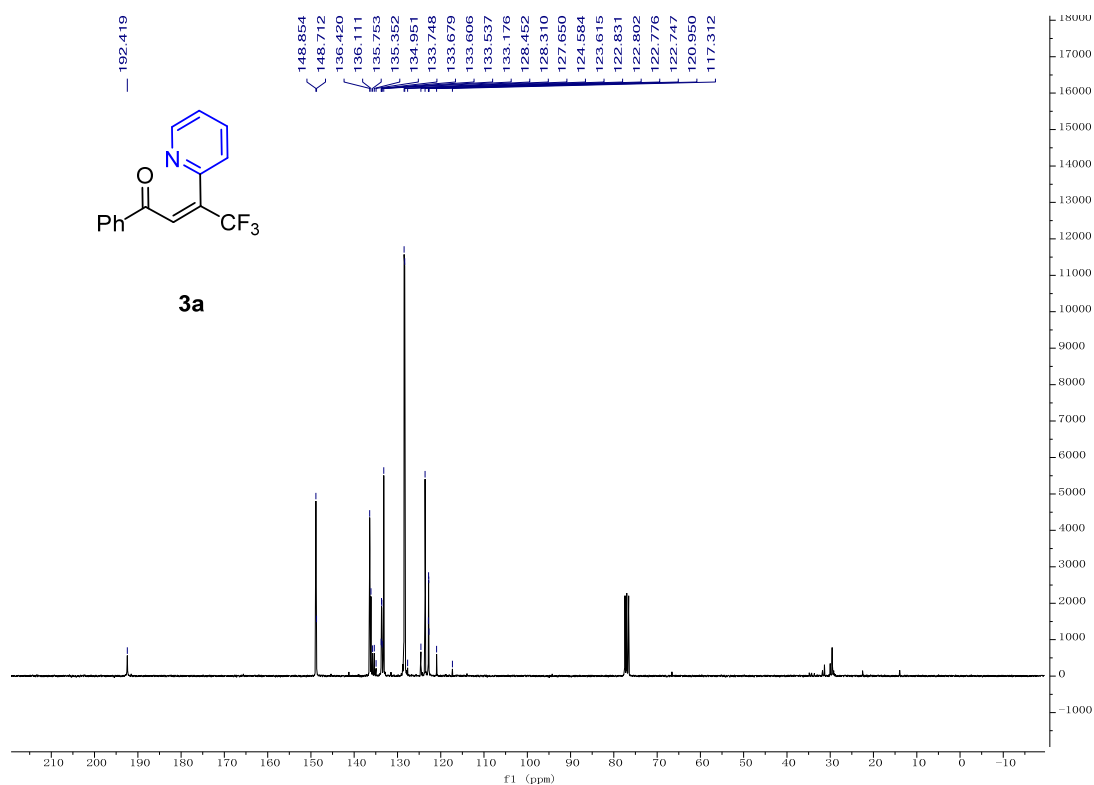 $^{19}\text{F}$  NMR (376 MHz,  $\text{CDCl}_3$ ) of compound **3a**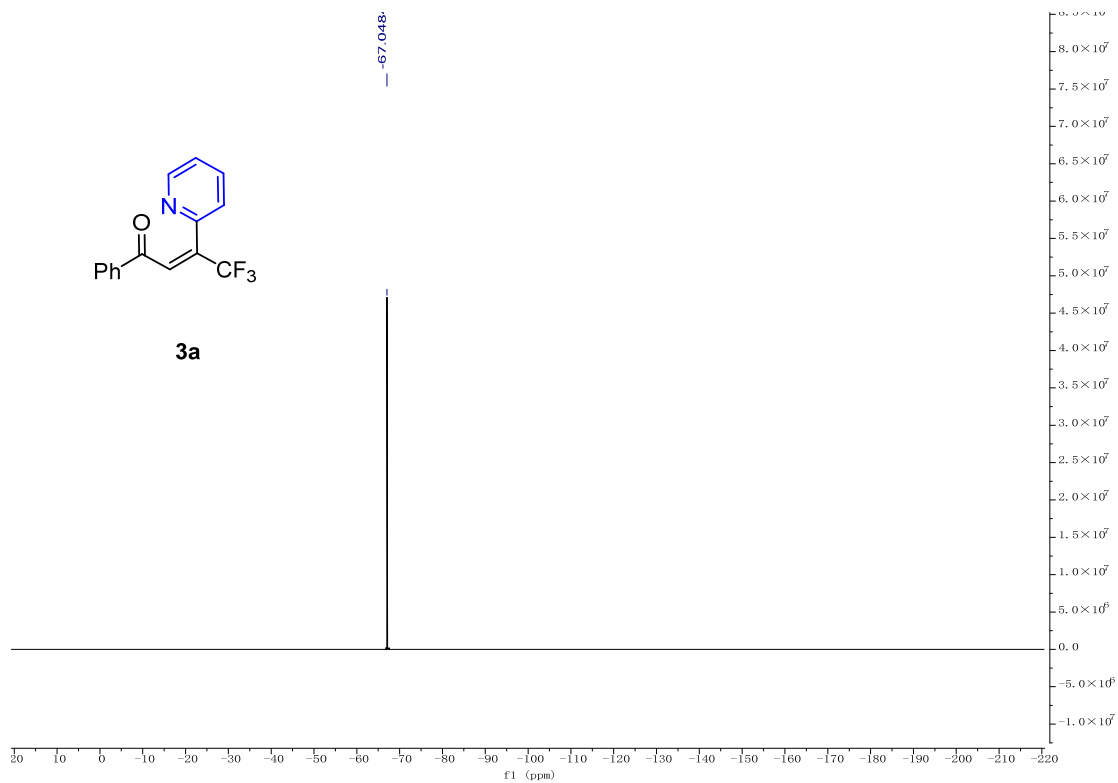

$^1\text{H}$  NMR (300 MHz,  $\text{CDCl}_3$ ) of compound **3b**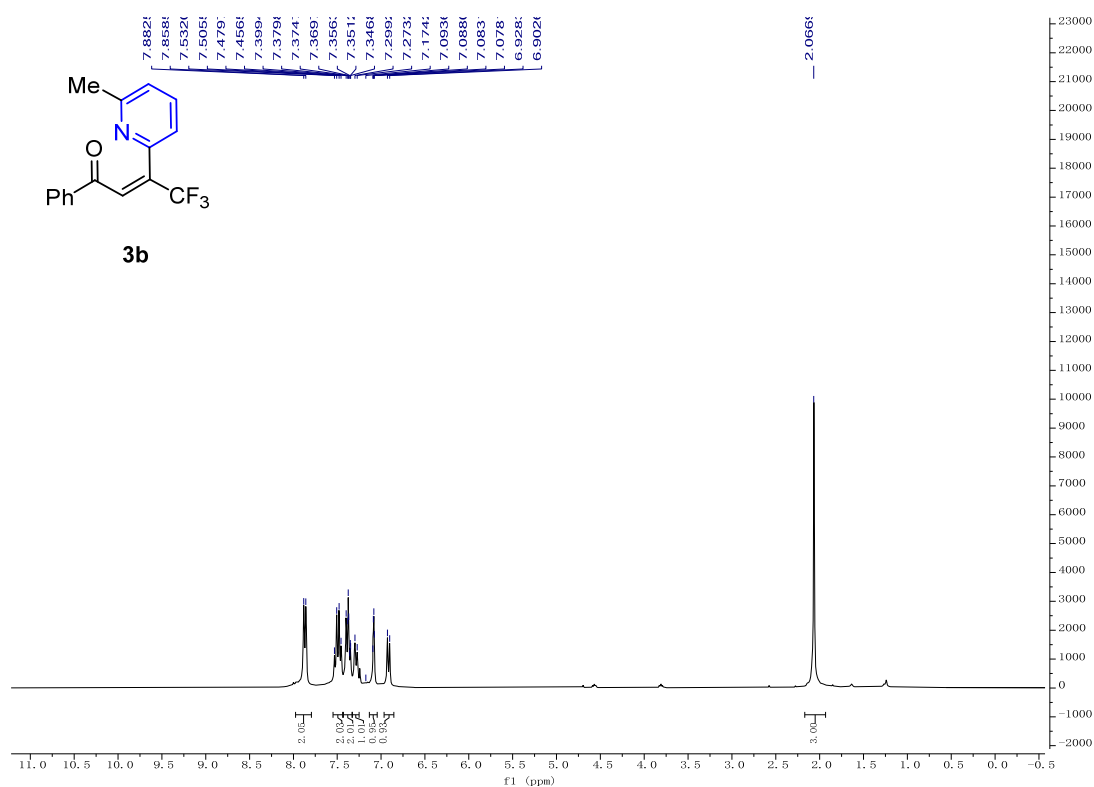 $^{13}\text{C}$  NMR (75 MHz,  $\text{CDCl}_3$ ) of compound **3b**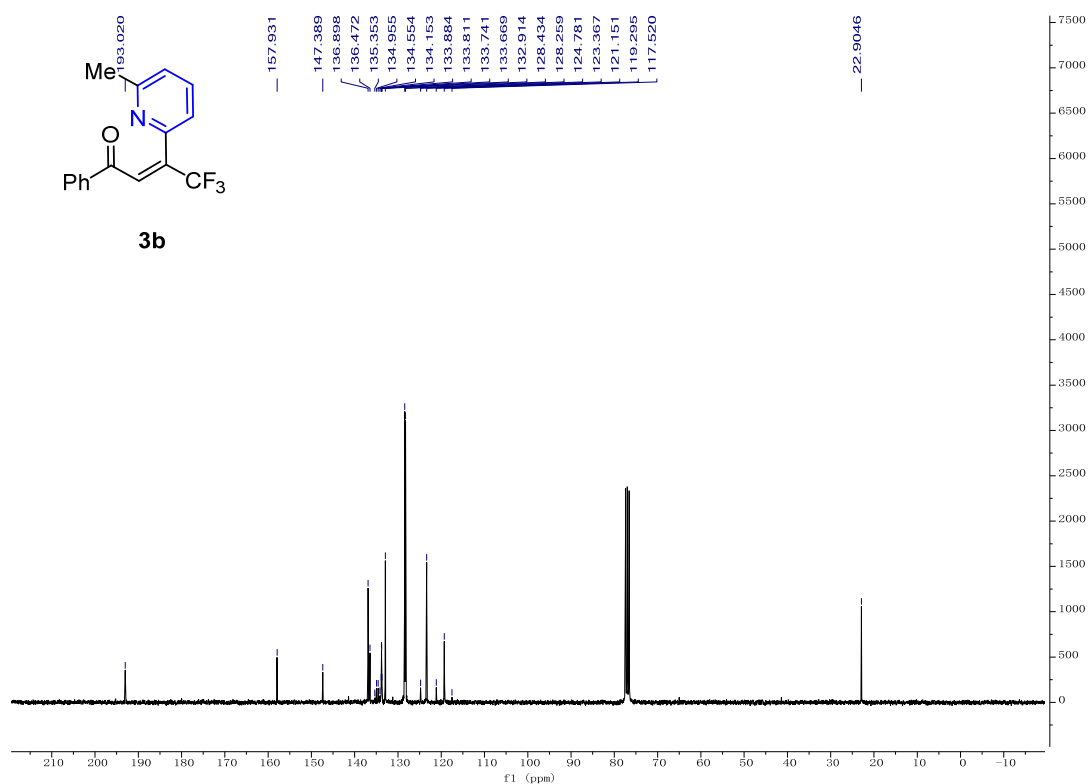

$^{19}\text{F}$  NMR (376 MHz,  $\text{CDCl}_3$ ) of compound **3b**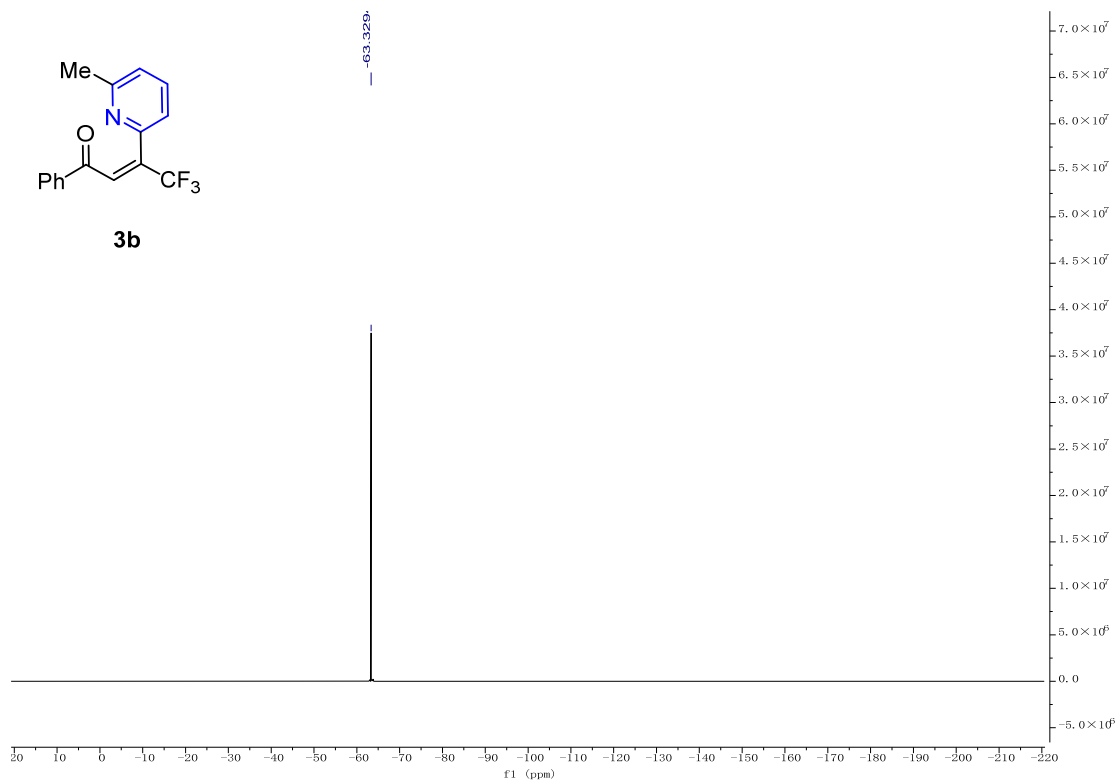 $^1\text{H}$  NMR (300 MHz,  $\text{CDCl}_3$ ) of compound **3c**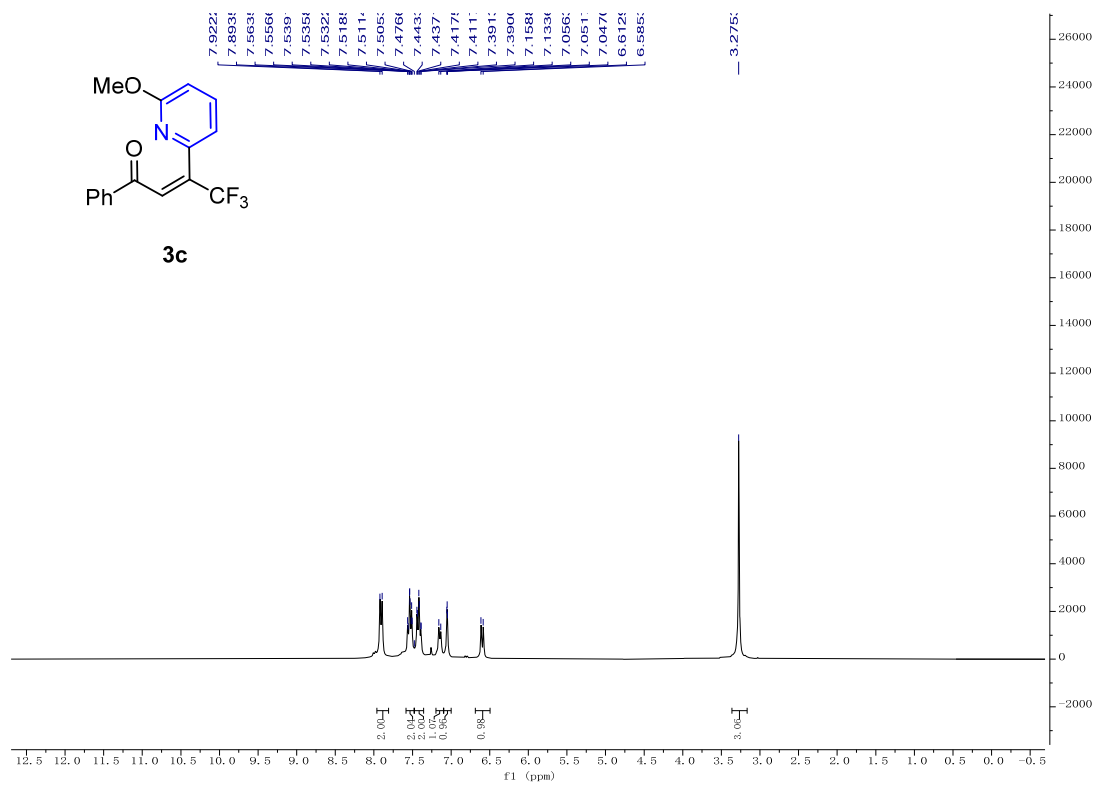

$^{13}\text{C}$  NMR (75 MHz,  $\text{CDCl}_3$ ) of compound **3c**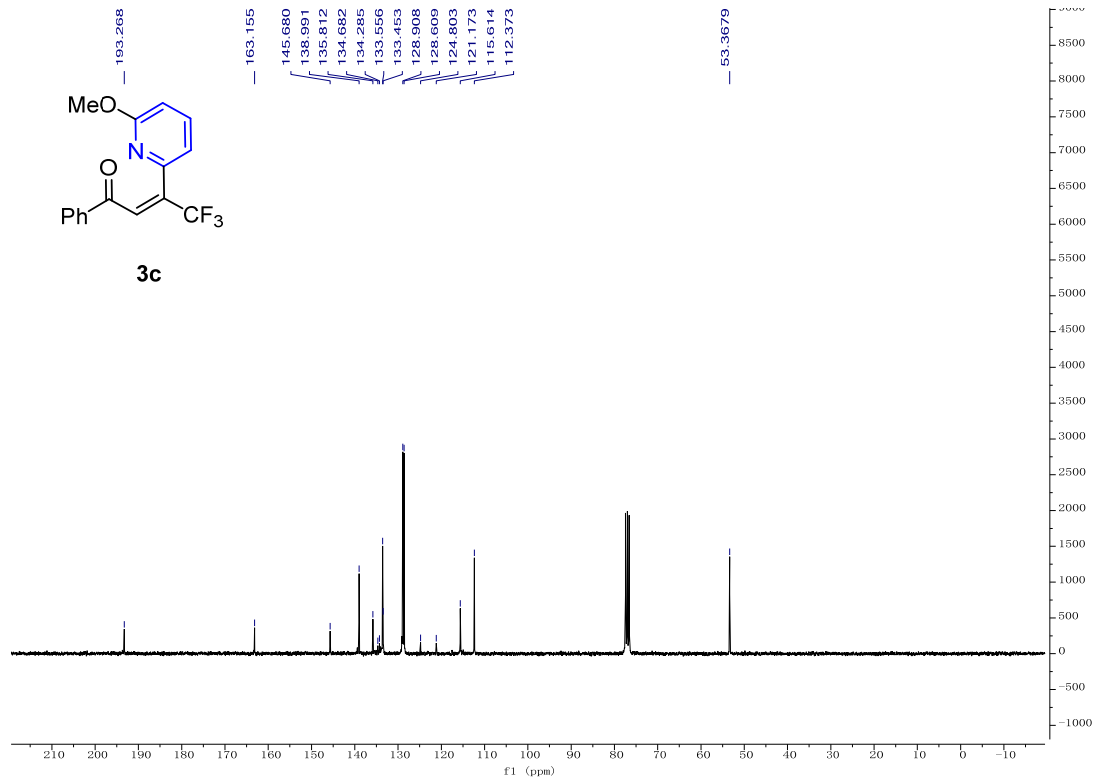 $^{19}\text{F}$  NMR (376 MHz,  $\text{CDCl}_3$ ) of compound **3c**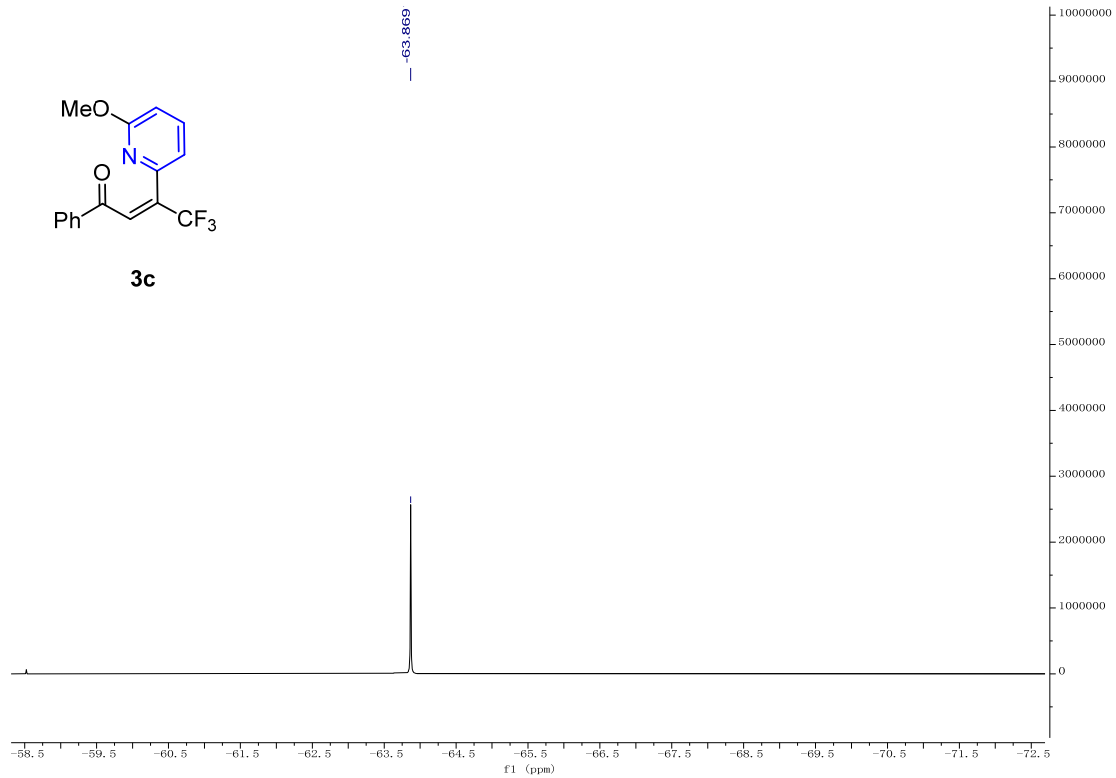



$^1\text{H}$  NMR (300 MHz,  $\text{CDCl}_3$ ) of compound **3d**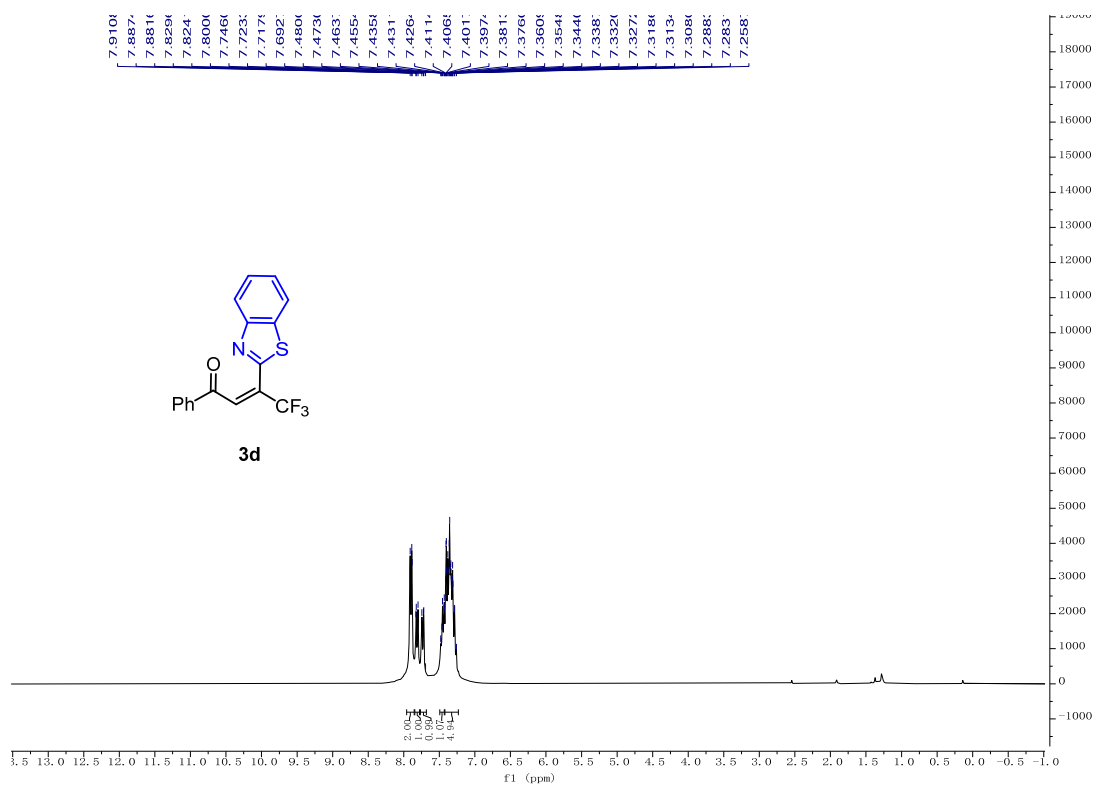 $^{13}\text{C}$  NMR (75 MHz,  $\text{CDCl}_3$ ) of compound **3d**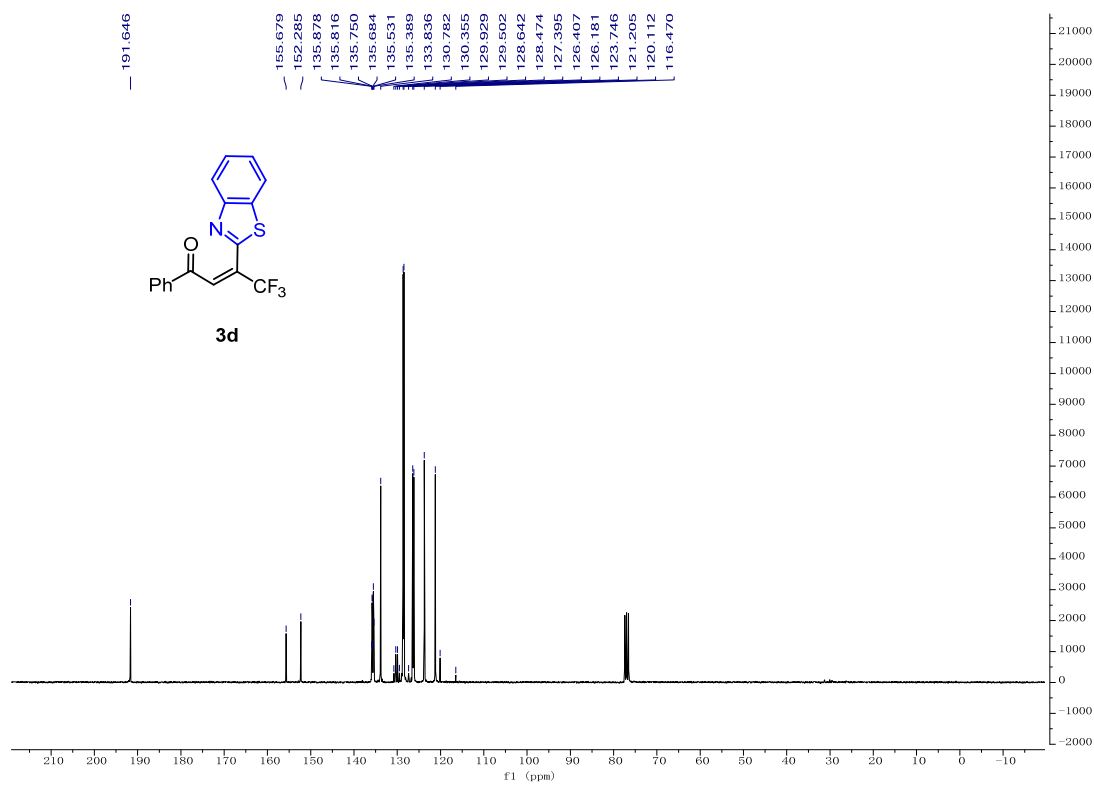

$^{19}\text{F}$  NMR (565 MHz,  $\text{CDCl}_3$ ) of compound **3d**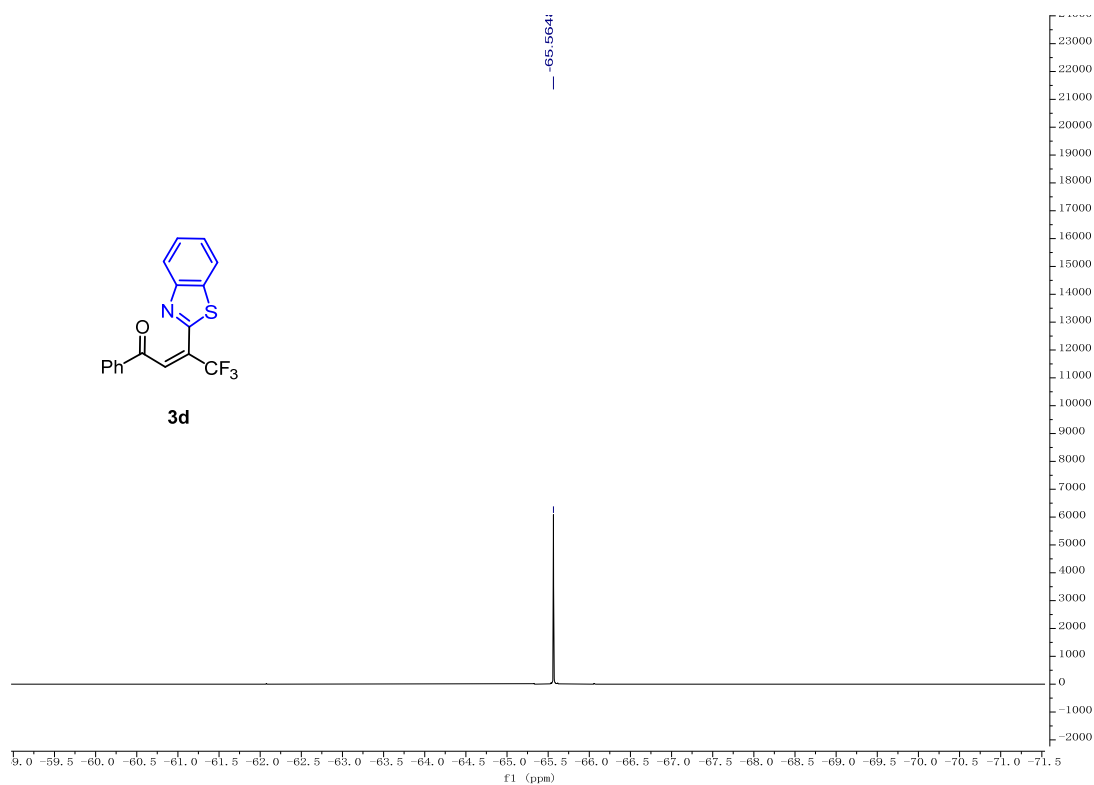 $^1\text{H}$  NMR (300 MHz,  $\text{CDCl}_3$ ) of compound **3e**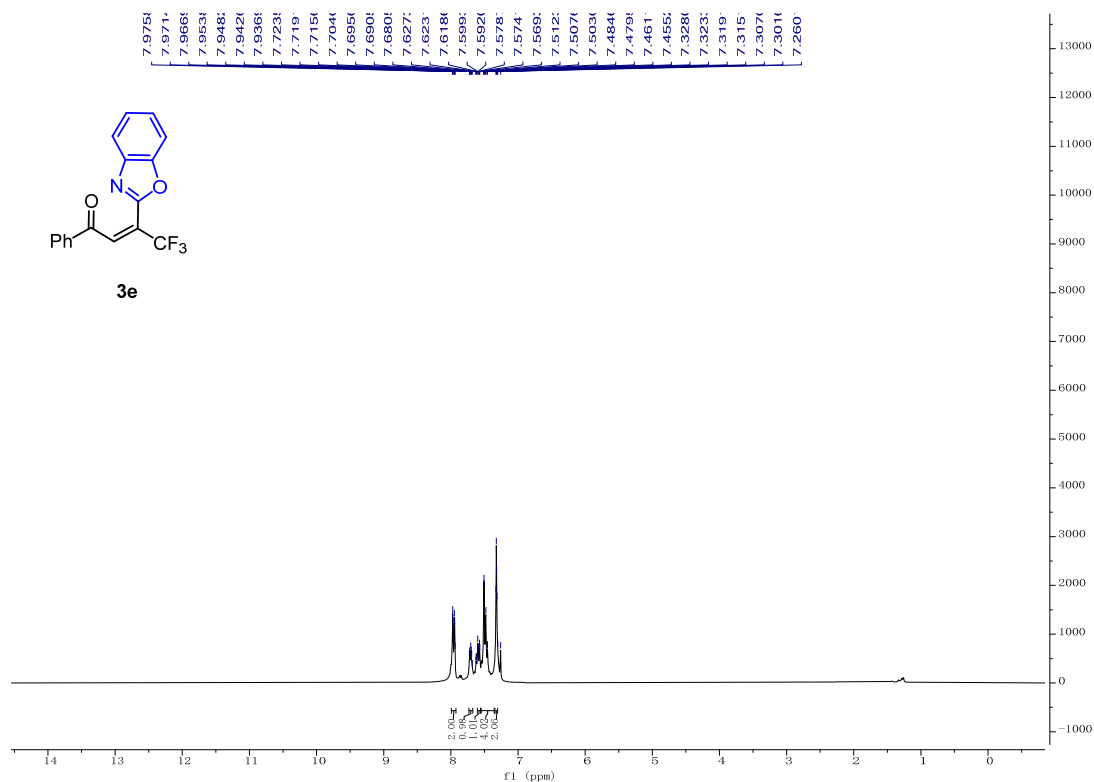

$^{13}\text{C}$  NMR (75 MHz,  $\text{CDCl}_3$ ) of compound **3e**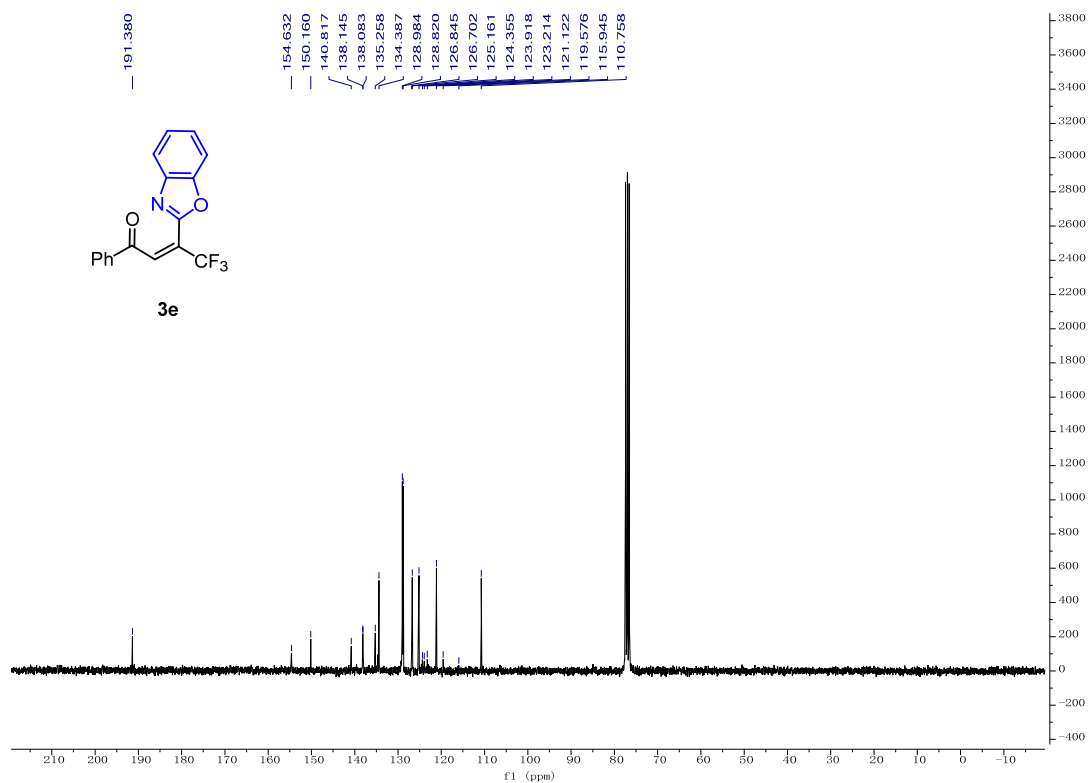 $^{19}\text{F}$  NMR (376 MHz,  $\text{CDCl}_3$ ) of compound **3e**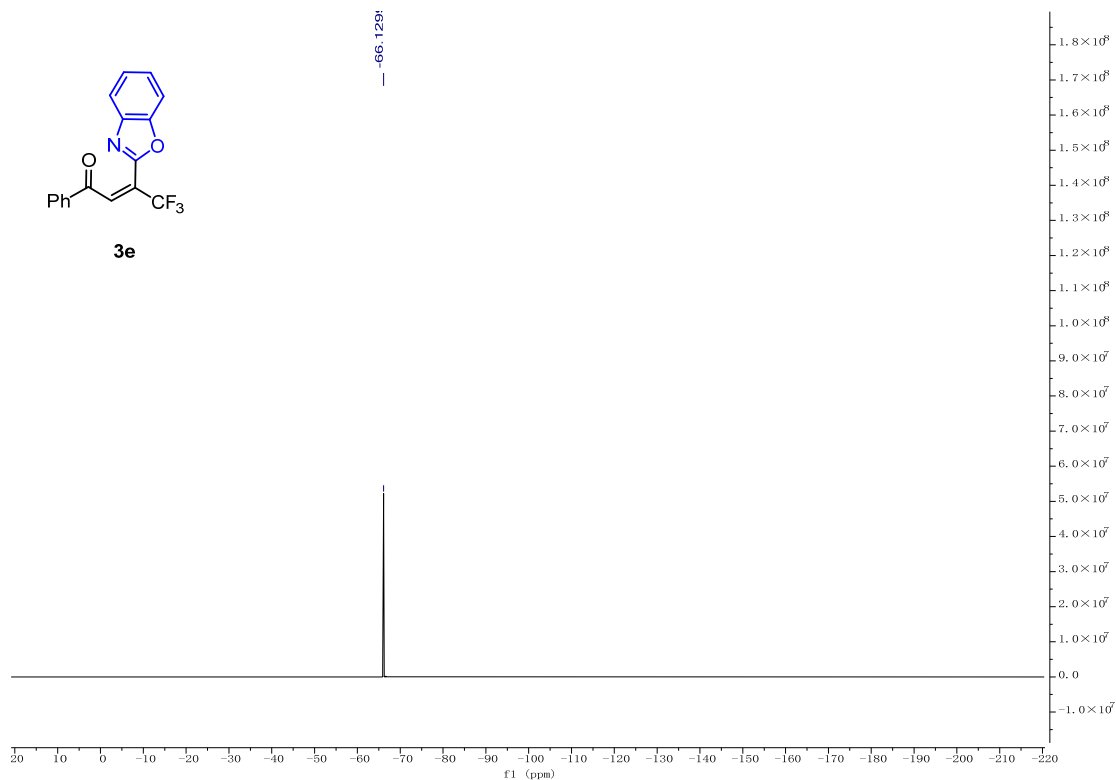

$^1\text{H}$  NMR (400 MHz,  $\text{CDCl}_3$ ) of compound **2a**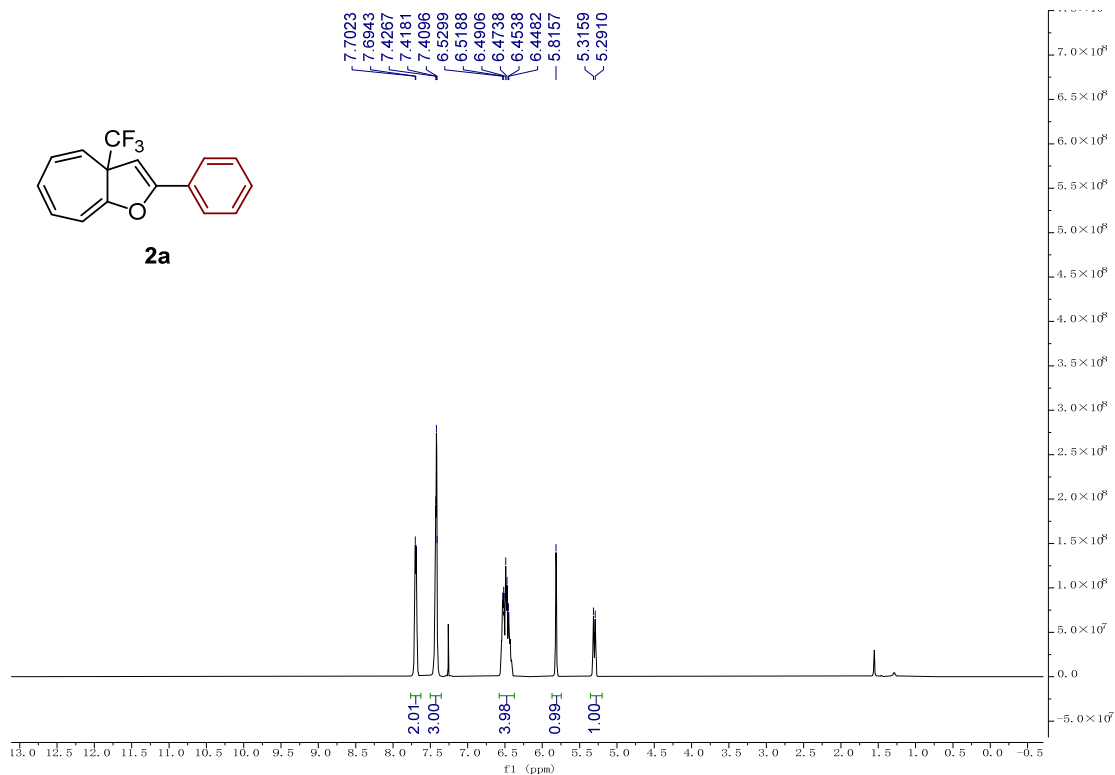 $^{13}\text{C}$  NMR (101 MHz,  $\text{CDCl}_3$ ) of compound **2a**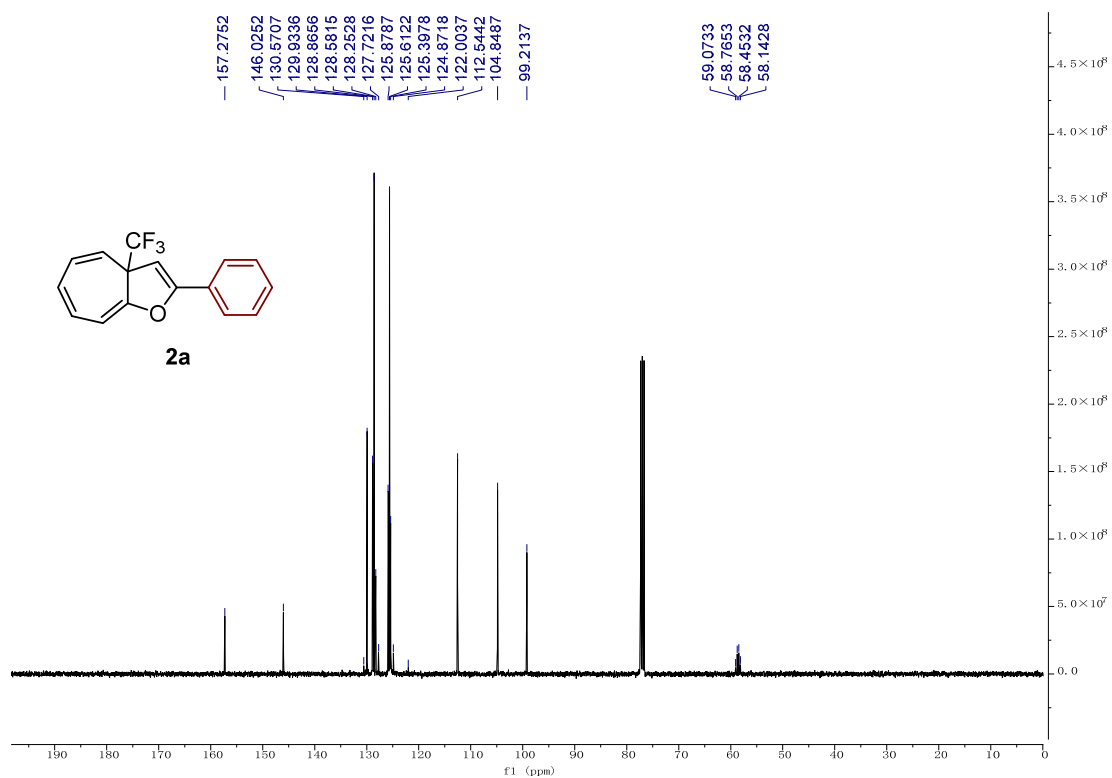

$^{19}\text{F}$  NMR (376 MHz,  $\text{CDCl}_3$ ) of compound **2a**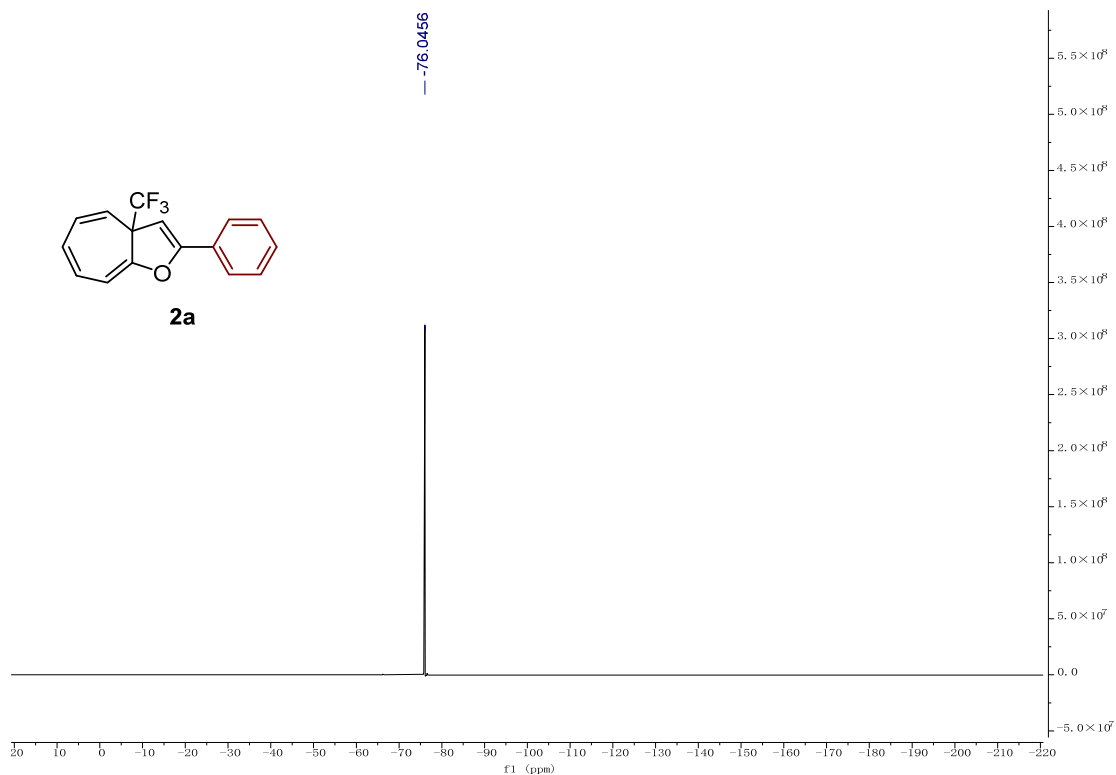 $^1\text{H}$  NMR (600 MHz,  $\text{CDCl}_3$ ) of compound of **2b**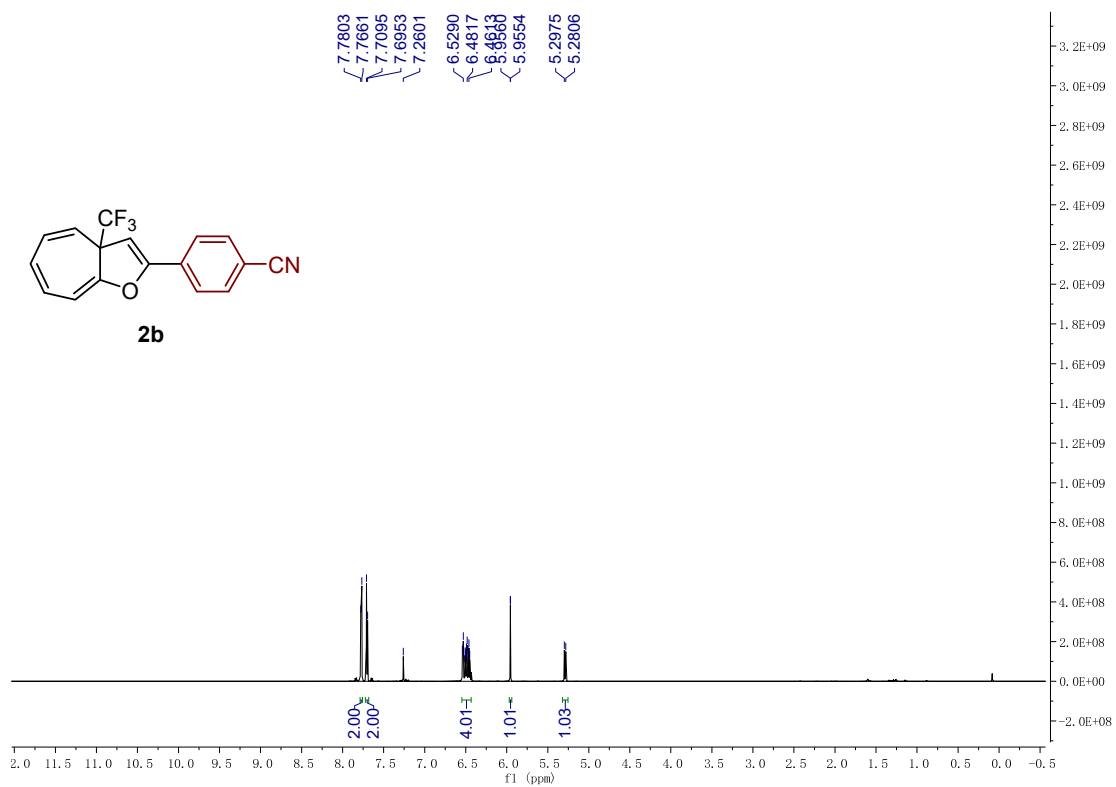

$^{13}\text{C}$  NMR (151 MHz,  $\text{CDCl}_3$ ) of compound **2b**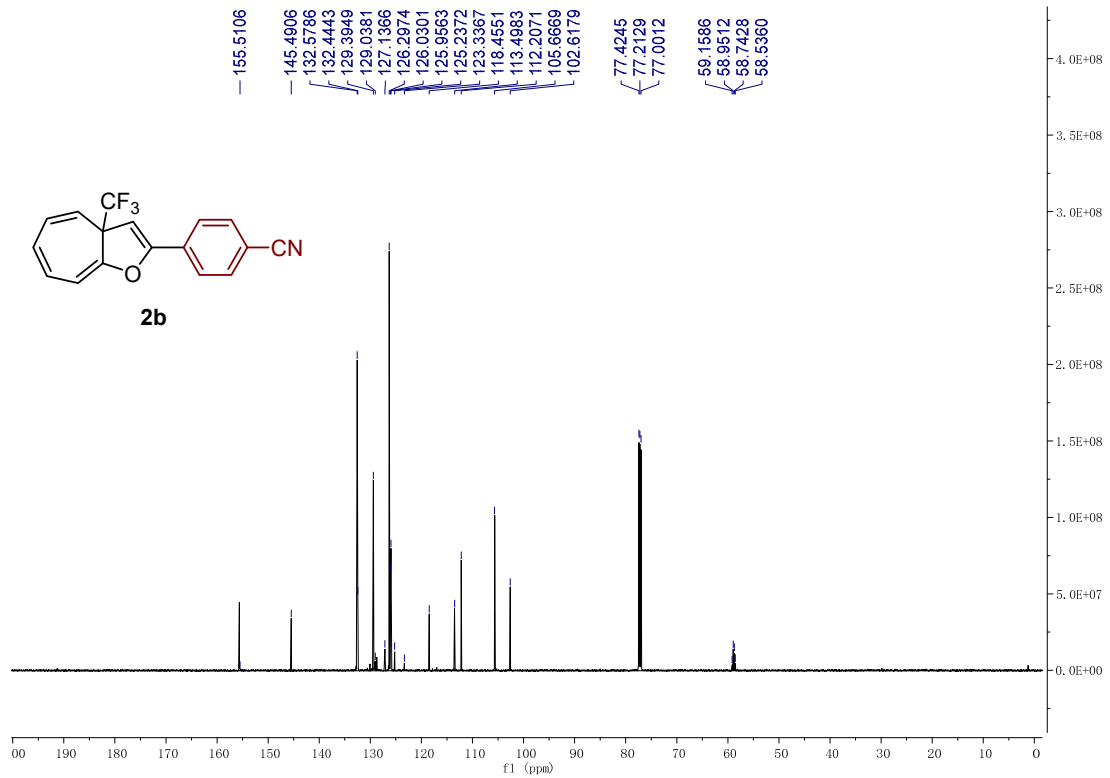 $^{19}\text{F}$  NMR (565 MHz,  $\text{CDCl}_3$ ) of compound of **2b**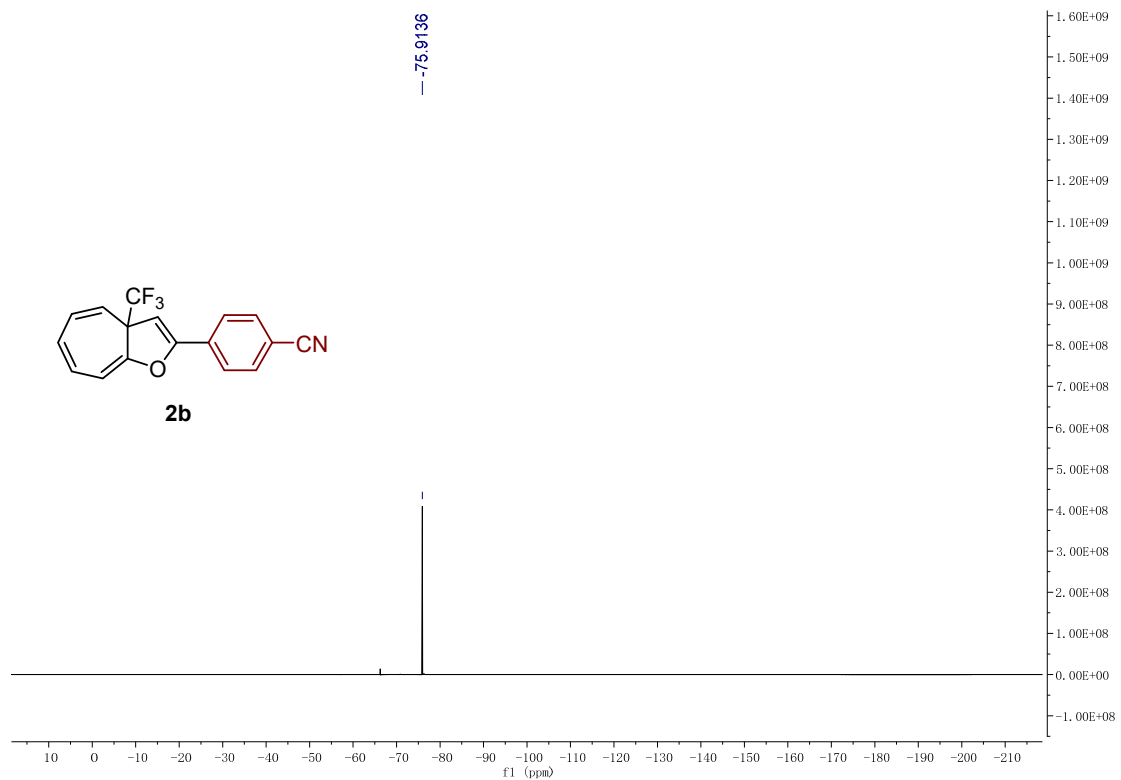

$^1\text{H}$  NMR (300 MHz,  $\text{CDCl}_3$ ) of compound of **2c**

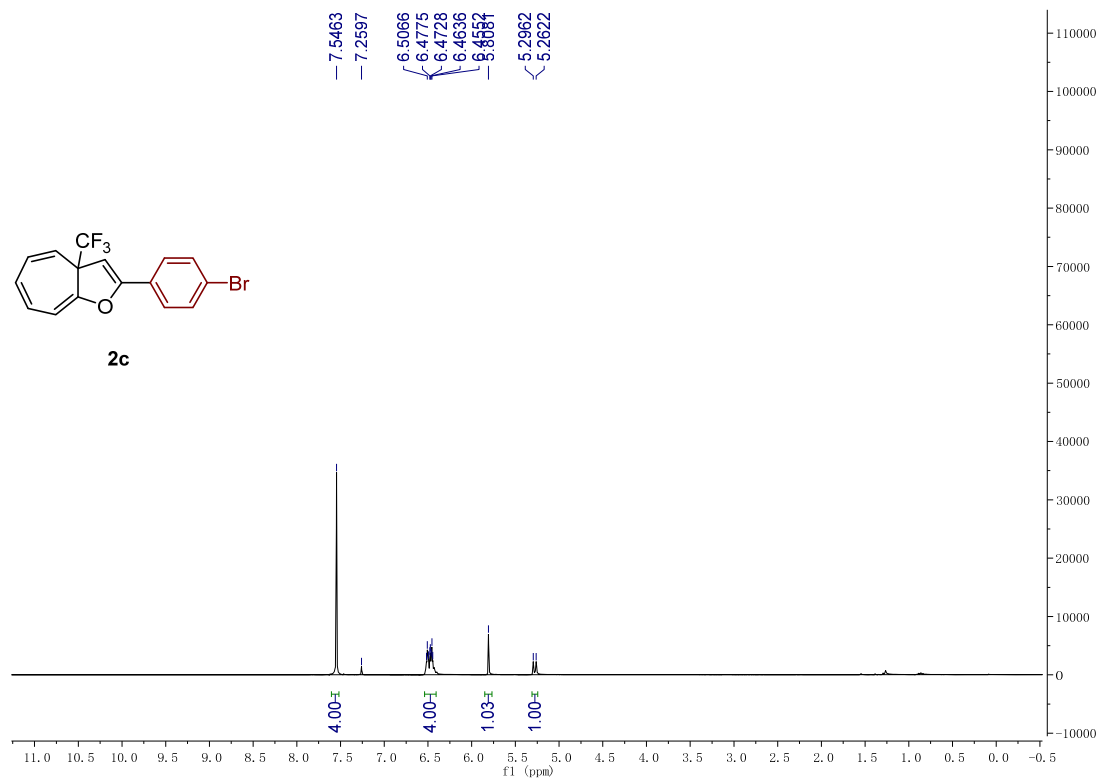

$^{13}\text{C}$  NMR (75 MHz,  $\text{CDCl}_3$ ) of compound **2c**

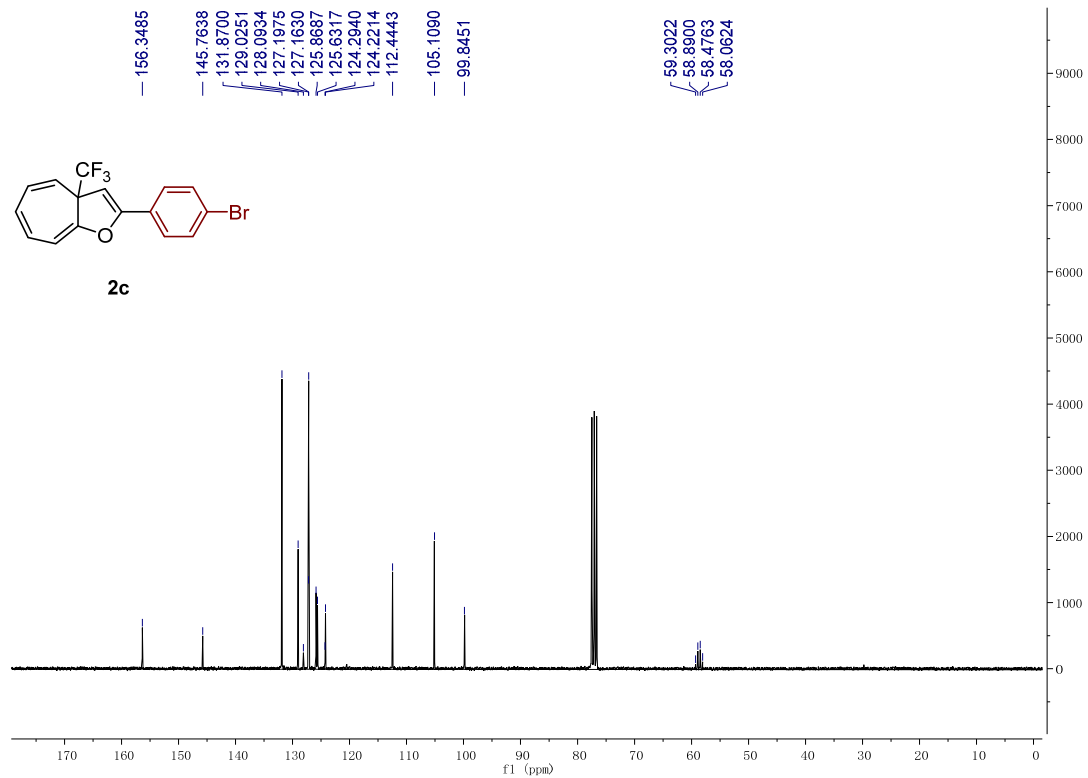

$^{19}\text{F}$  NMR (376 MHz,  $\text{CDCl}_3$ ) of compound **2c**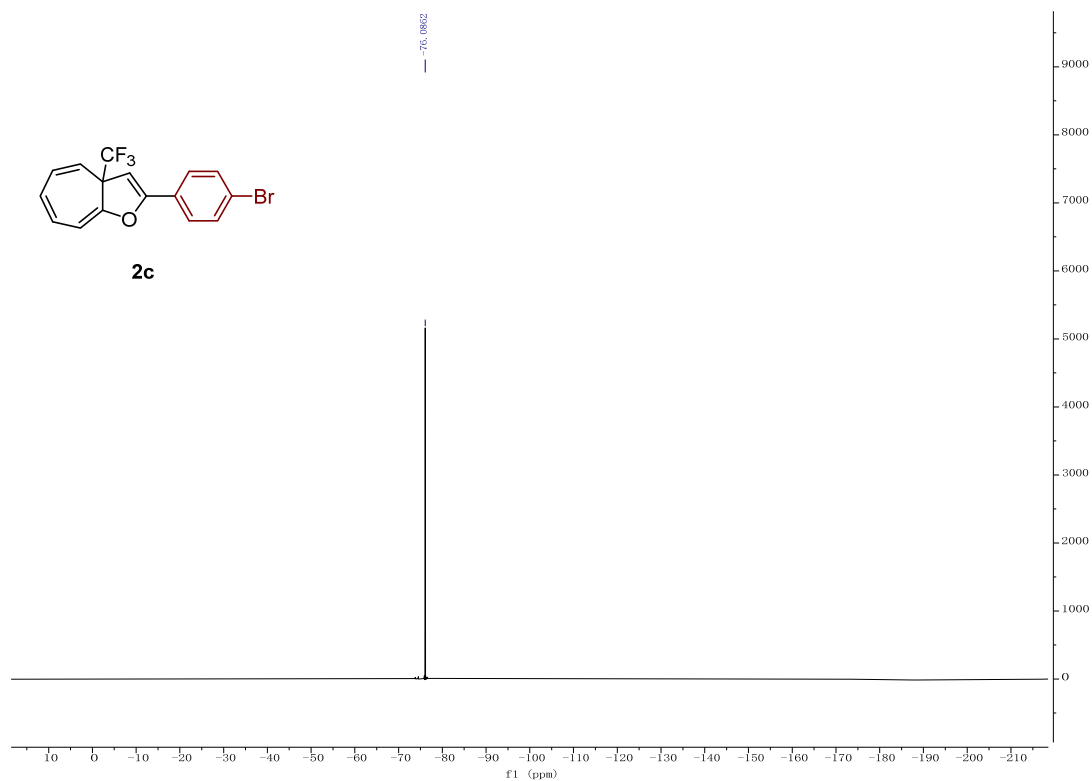 $^1\text{H}$  NMR (300 MHz,  $\text{CDCl}_3$ ) of compound **2d**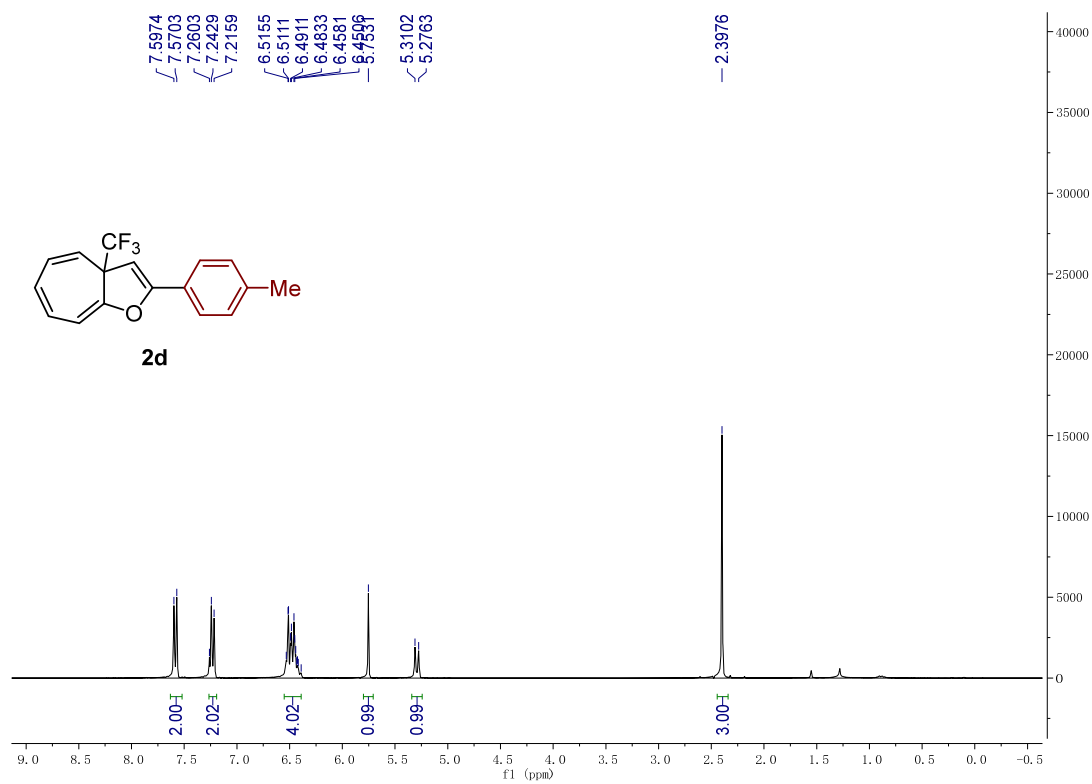



$^{13}\text{C}$  NMR (75 MHz,  $\text{CDCl}_3$ ) of compound **2d**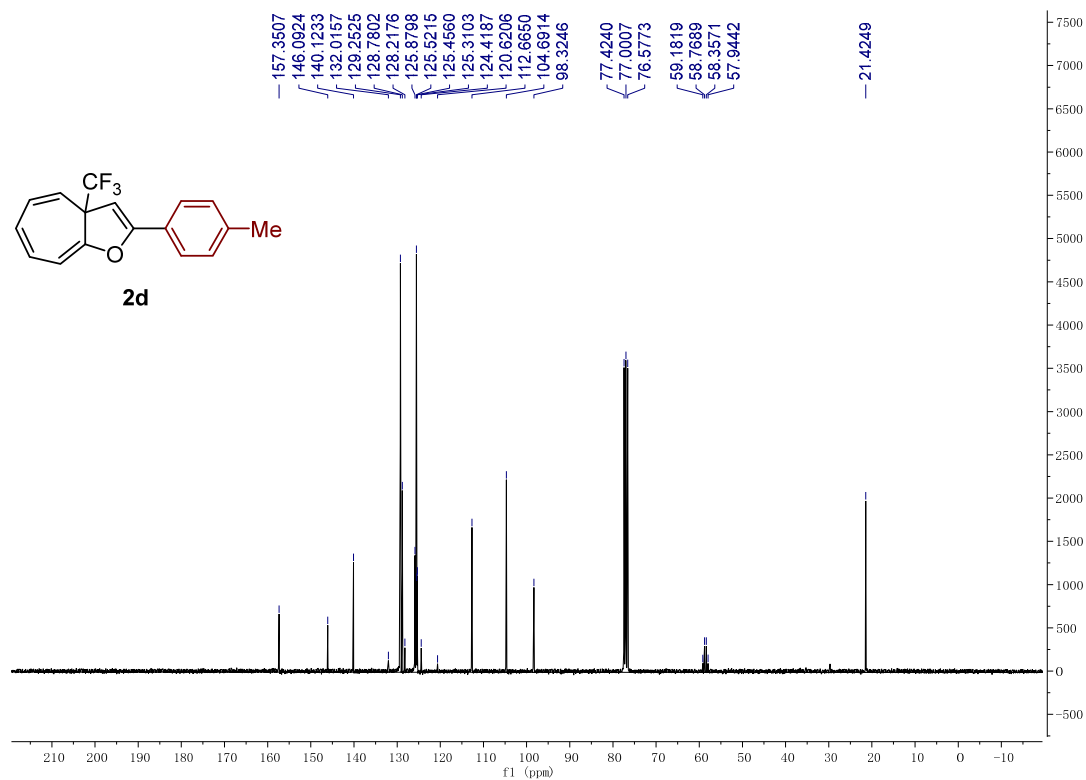 $^{19}\text{F}$  NMR (565 MHz,  $\text{CDCl}_3$ ) of compound **2d**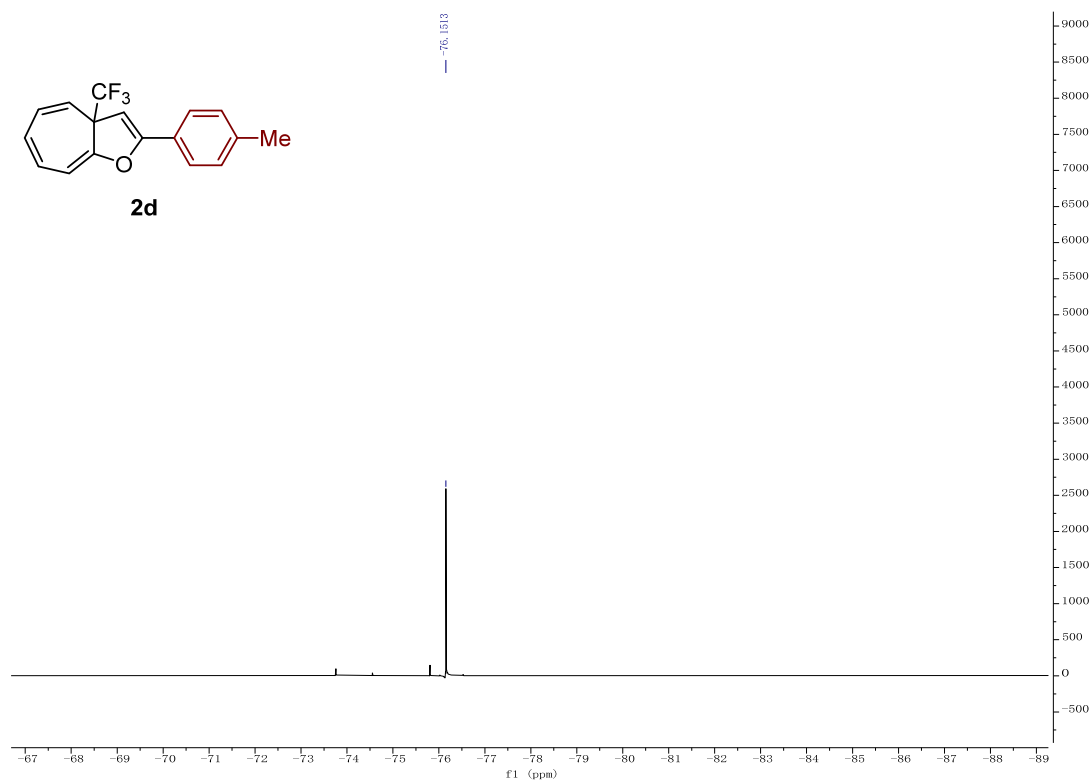

$^1\text{H}$  NMR (300 MHz,  $\text{CDCl}_3$ ) of compound **2e**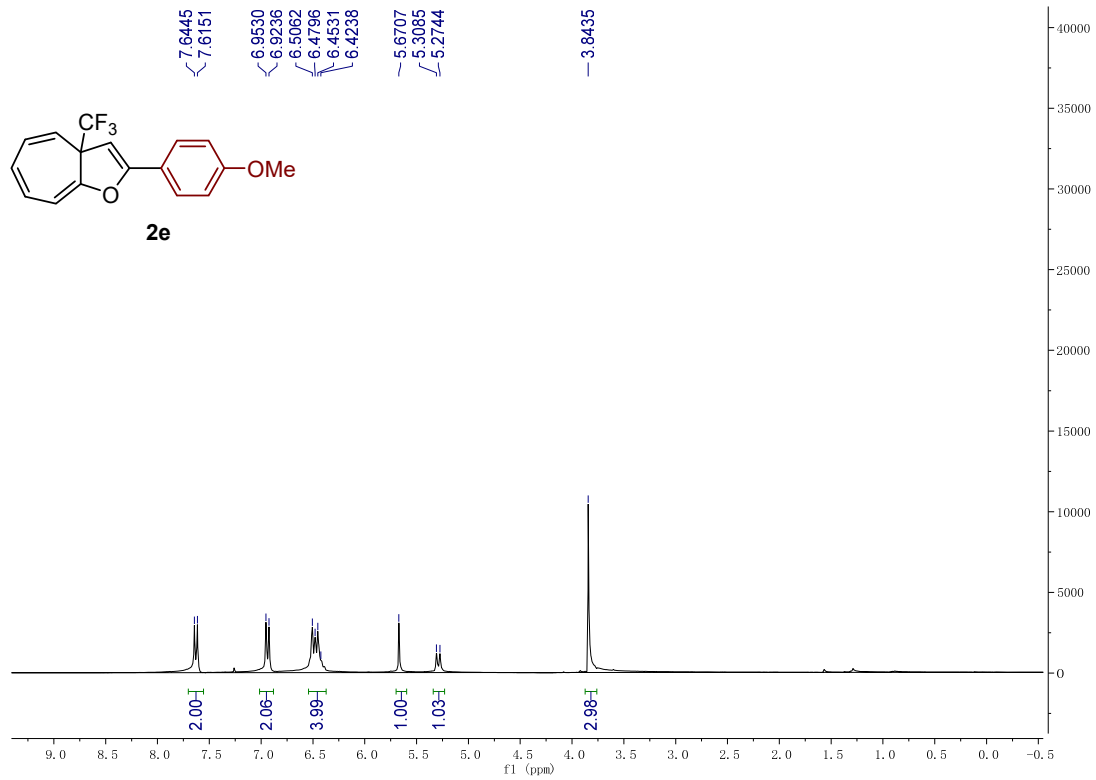 $^{13}\text{C}$  NMR (75 MHz,  $\text{CDCl}_3$ ) of compound **2e**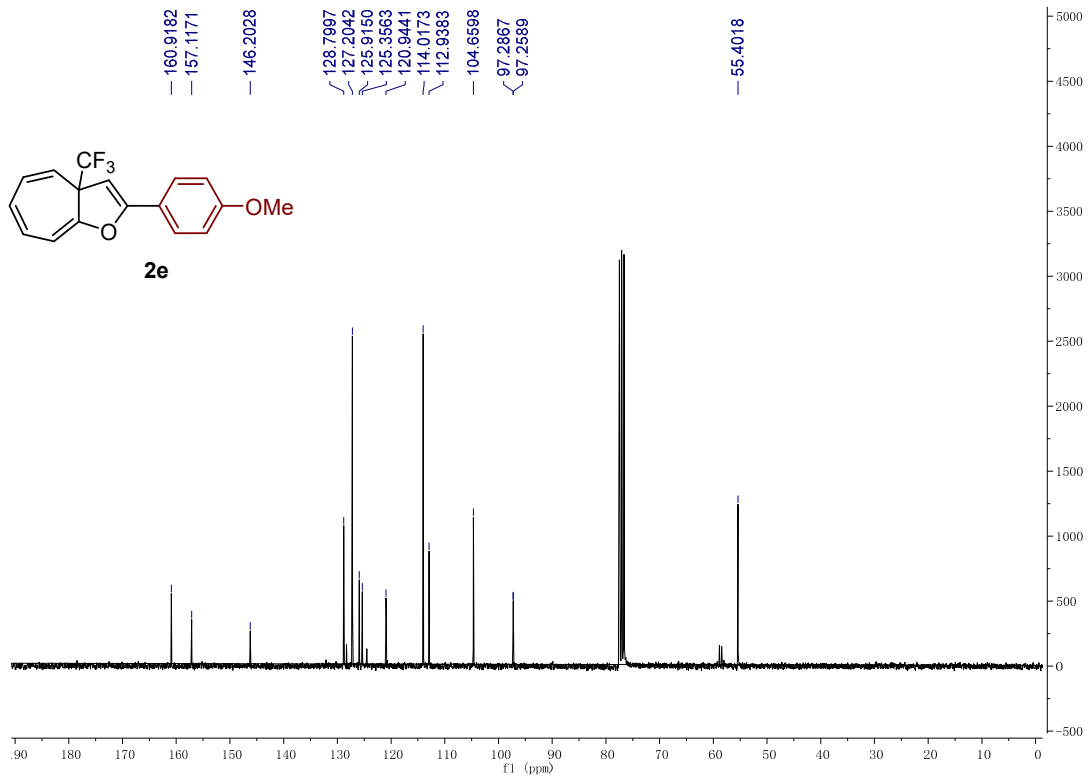

$^{19}\text{F}$  NMR (376 MHz,  $\text{CD}_2\text{Cl}_2$ ) of compound **2e**

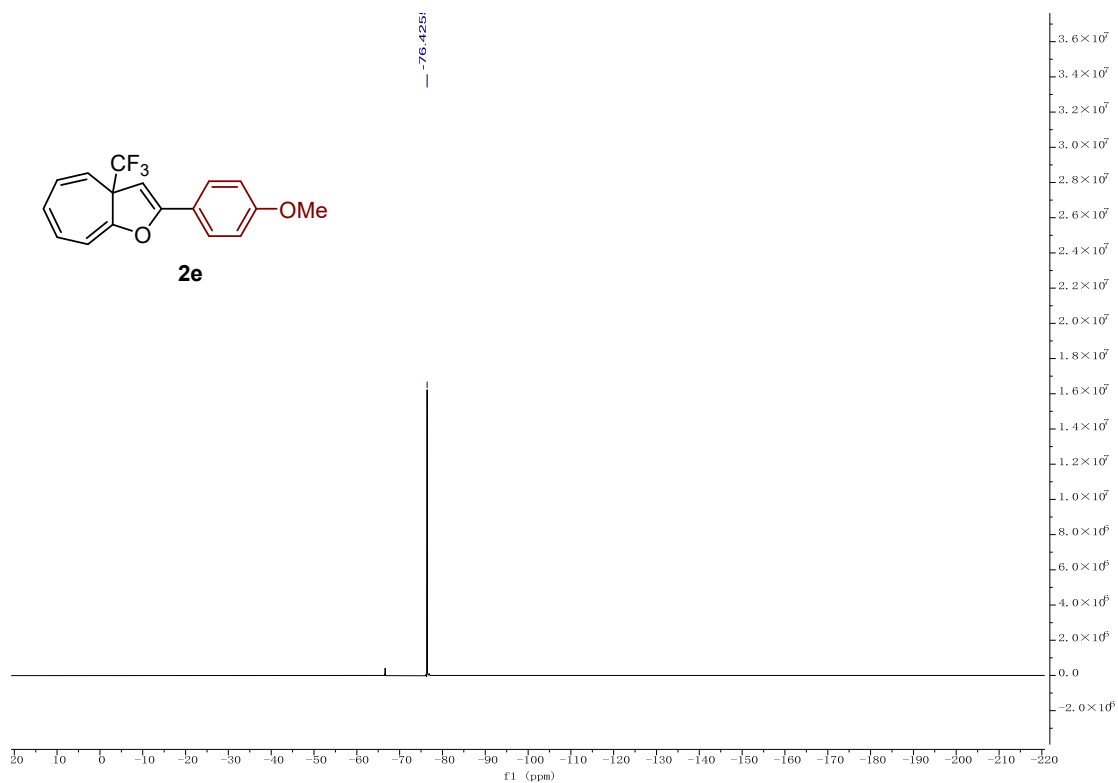

$^1\text{H}$  NMR (600 MHz,  $\text{CDCl}_3$ ) of compound **2f**

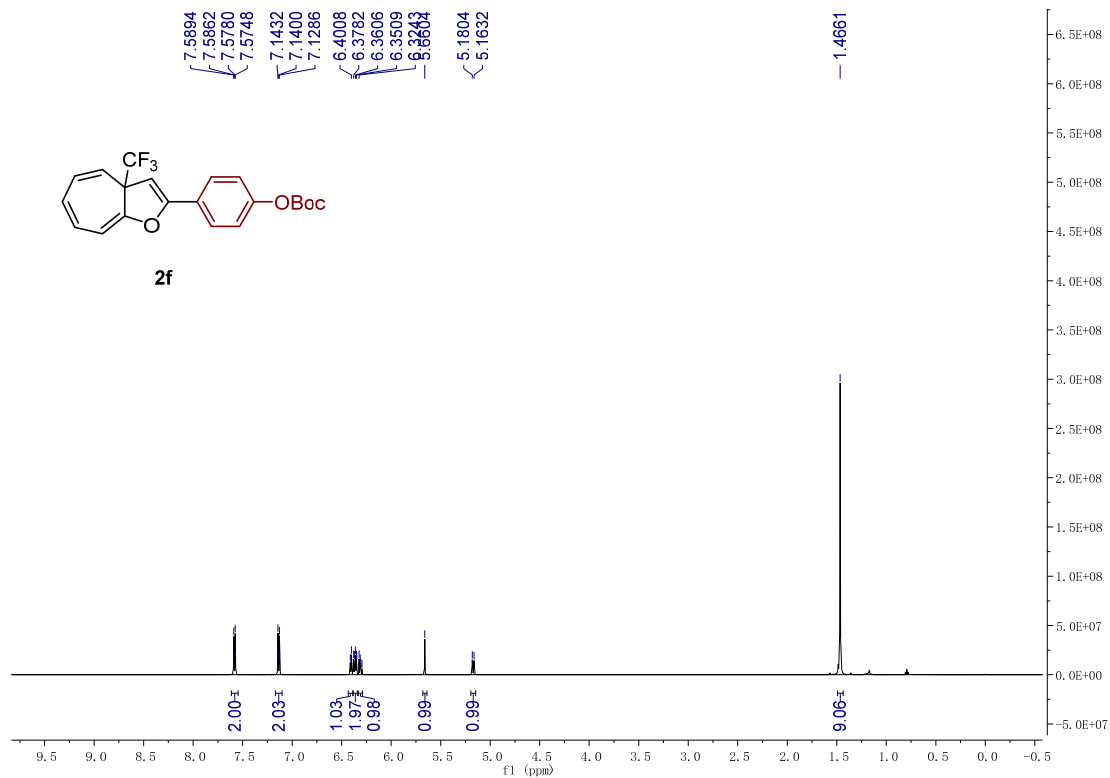

$^{13}\text{C}$  NMR (151 MHz,  $\text{CDCl}_3$ ) of compound **2f**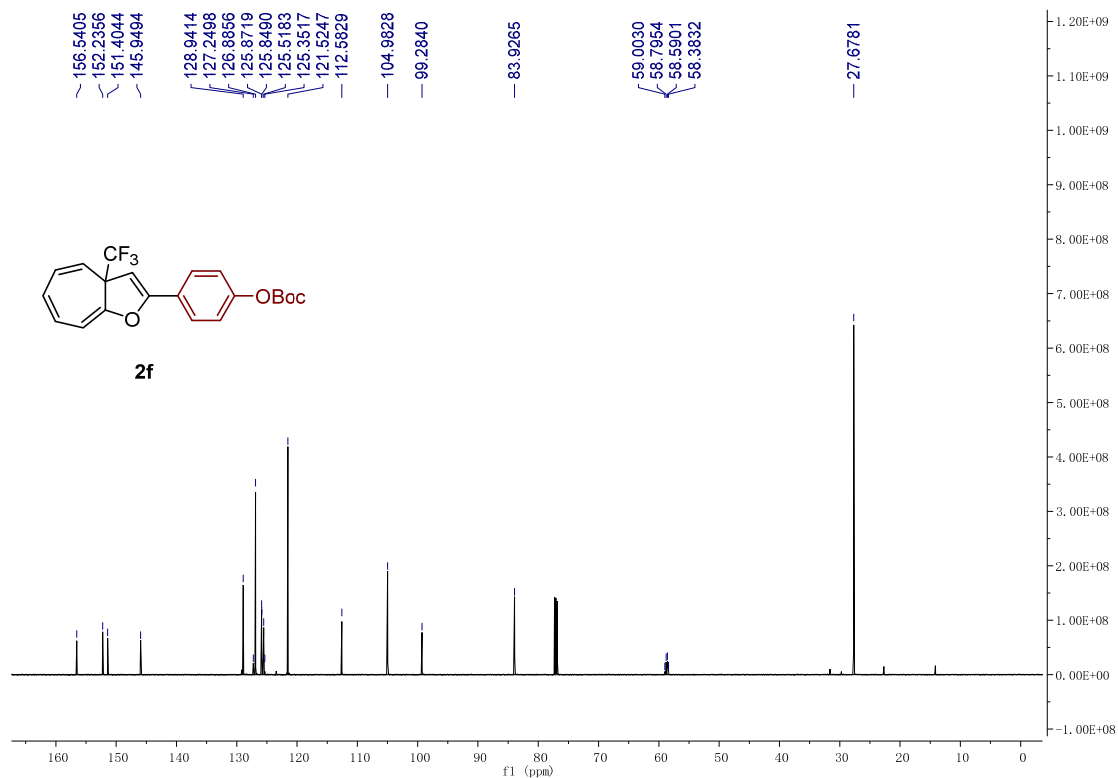 $^{19}\text{F}$  NMR (565 MHz,  $\text{CDCl}_3$ ) of compound **2f**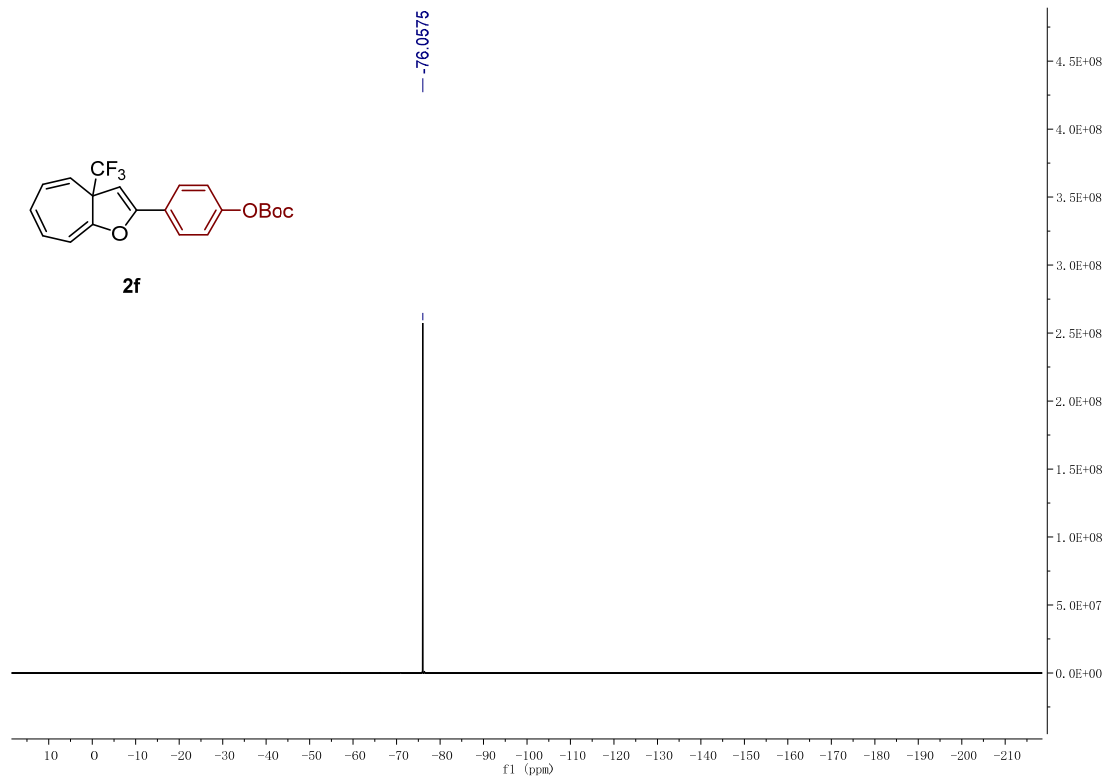

$^1\text{H}$  NMR (400 MHz,  $\text{CDCl}_3$ ) of compound **2g**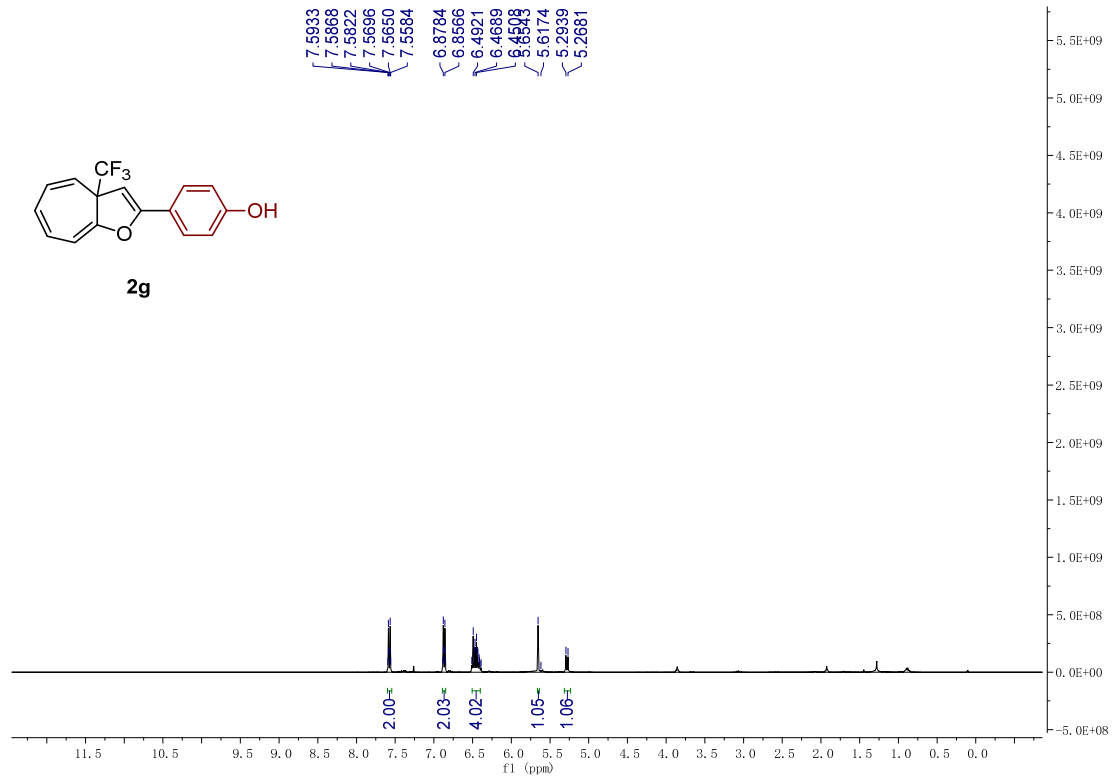 $^{13}\text{C}$  NMR (101 MHz,  $\text{CDCl}_3$ ) of compound **2g**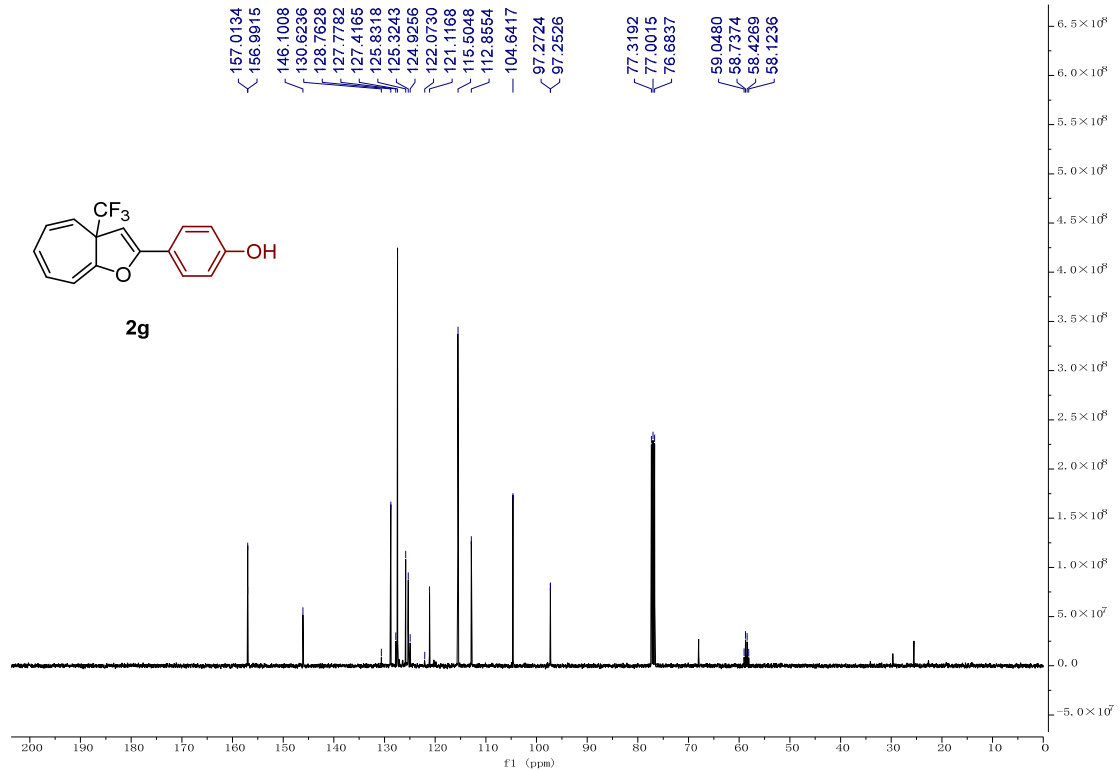

$^{19}\text{F}$  NMR (376 MHz,  $\text{CDCl}_3$ ) of compound **2g**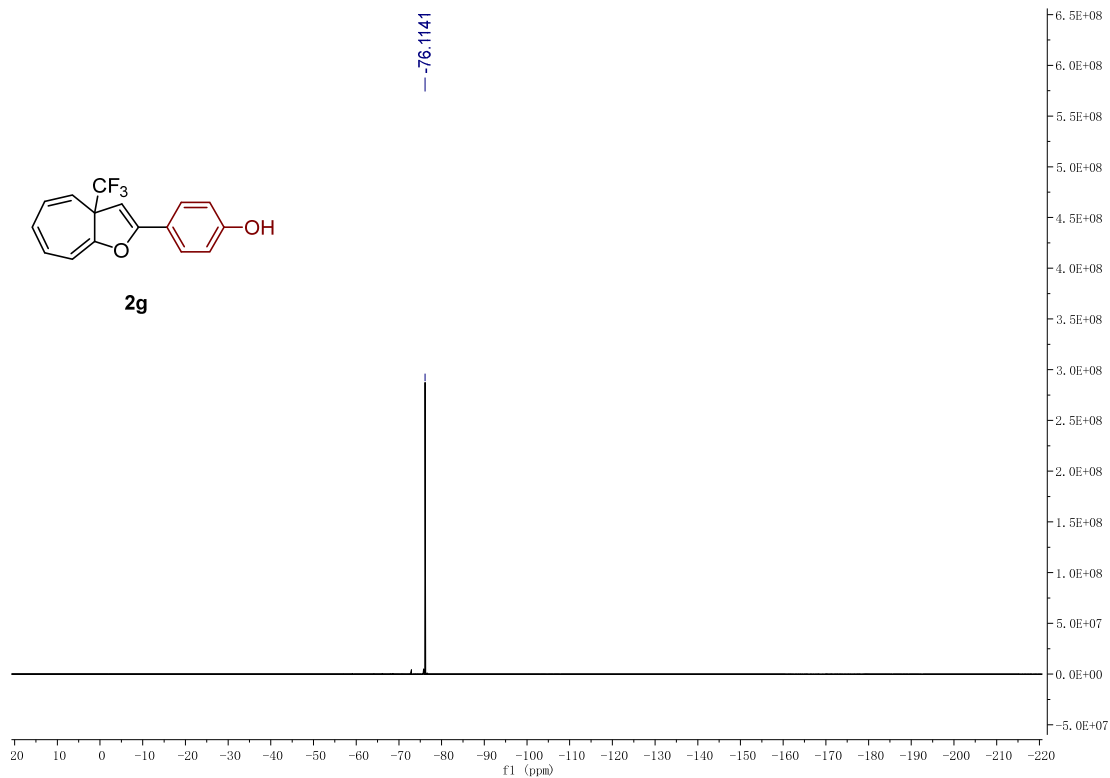 $^1\text{H}$  NMR (600 MHz,  $\text{CDCl}_3$ ) of compound **2h**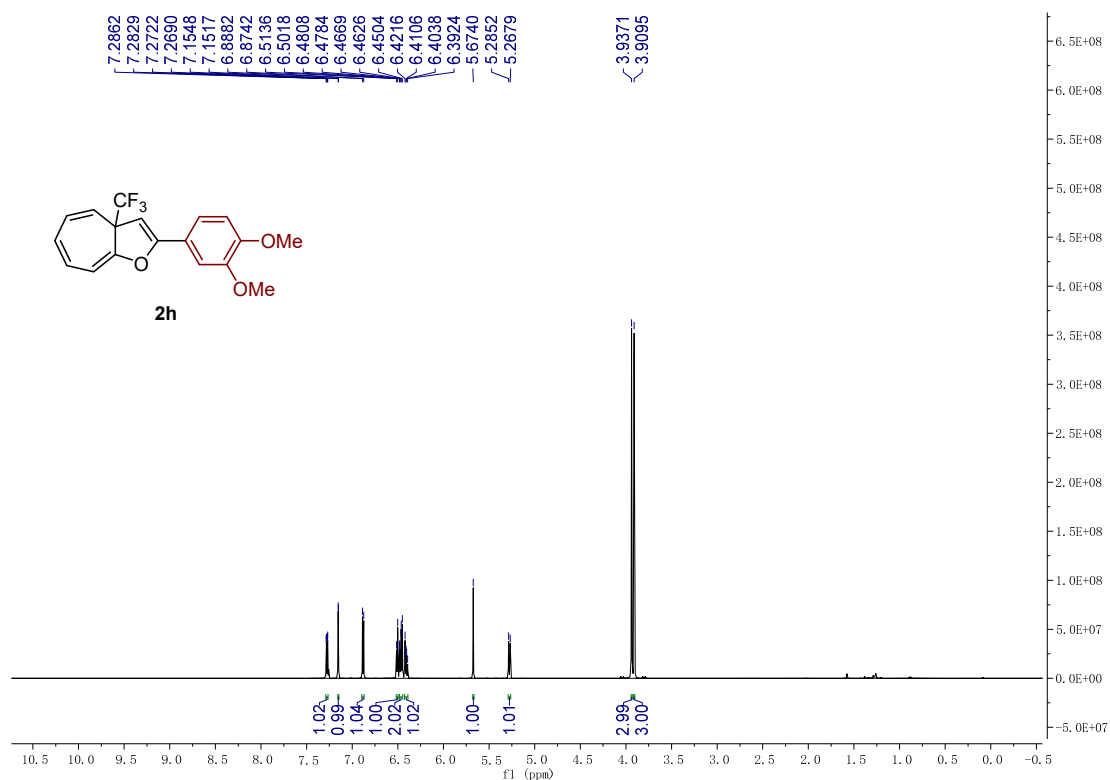

$^{13}\text{C}$  NMR (151 MHz,  $\text{CDCl}_3$ ) of compound **2h**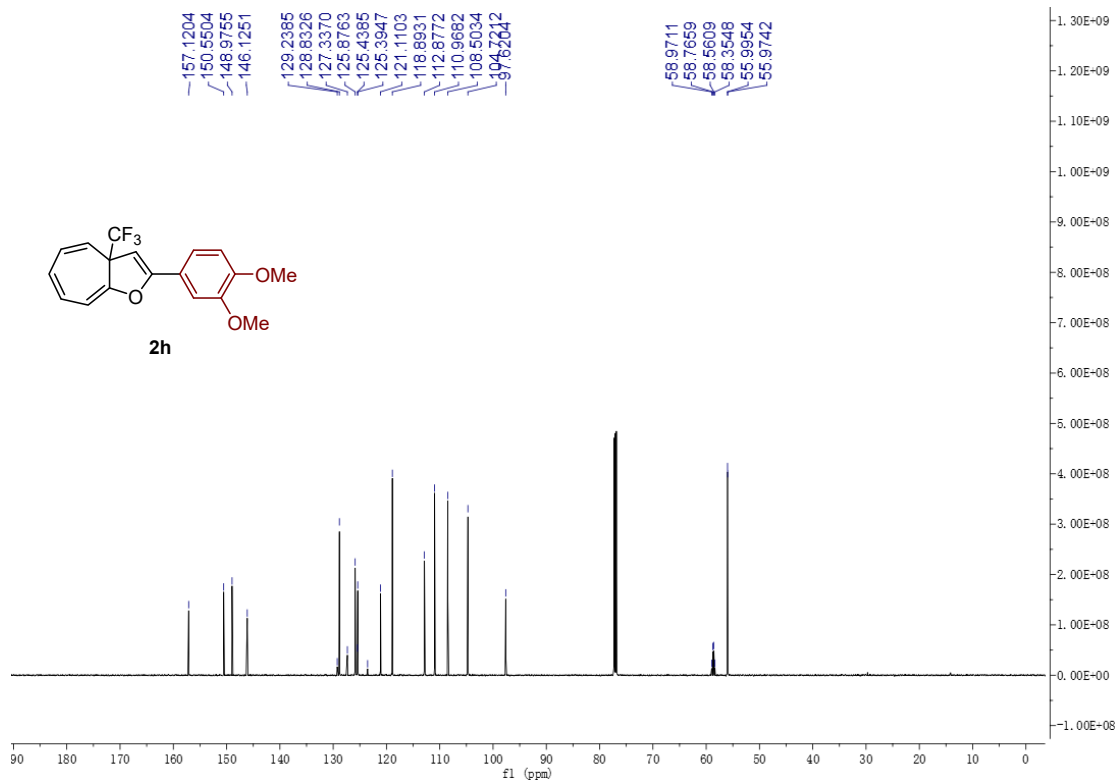 $^{19}\text{F}$  NMR (565 MHz,  $\text{CDCl}_3$ ) of compound **2h**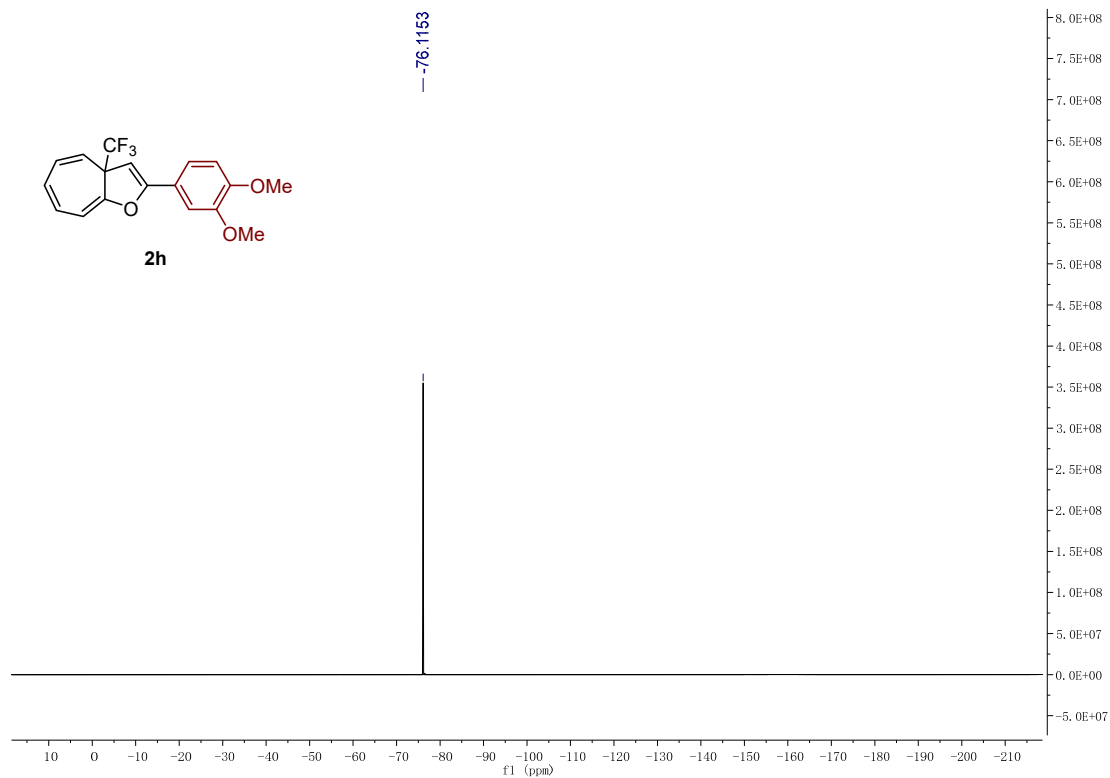

$^1\text{H}$  NMR (600 MHz,  $\text{CDCl}_3$ ) of compound **2i**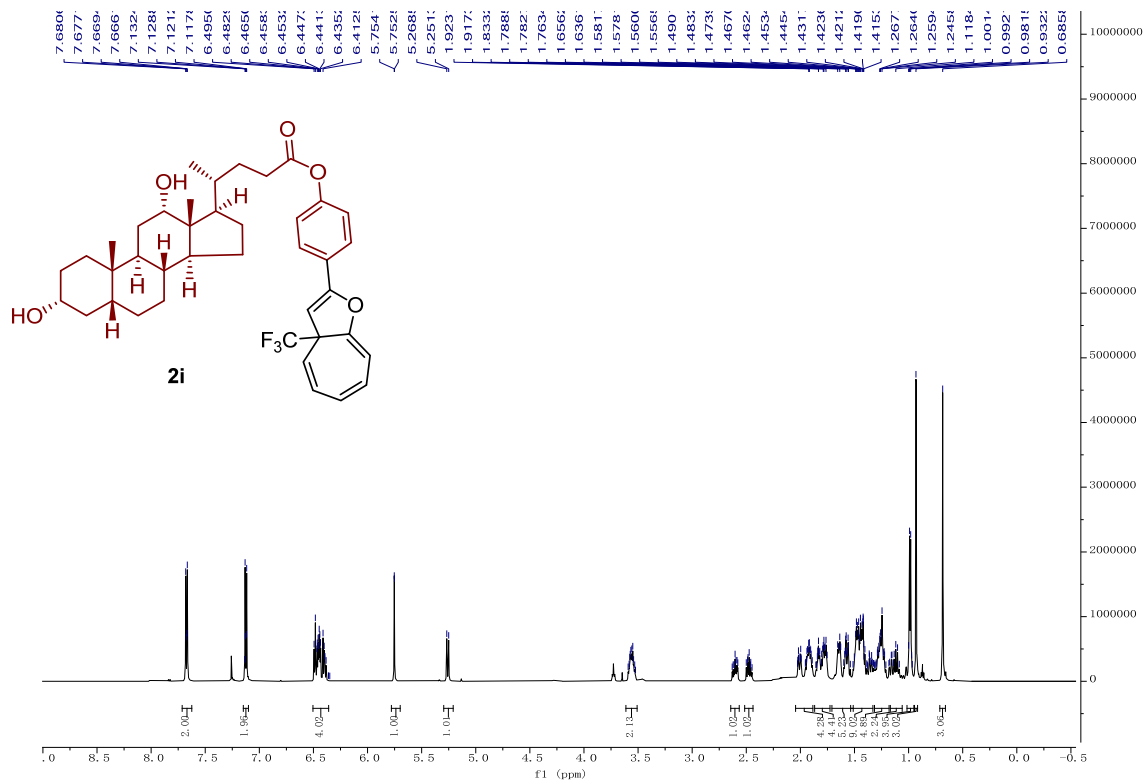 $^{13}\text{C}$  NMR (151 MHz,  $\text{CDCl}_3$ ) of compound **2i**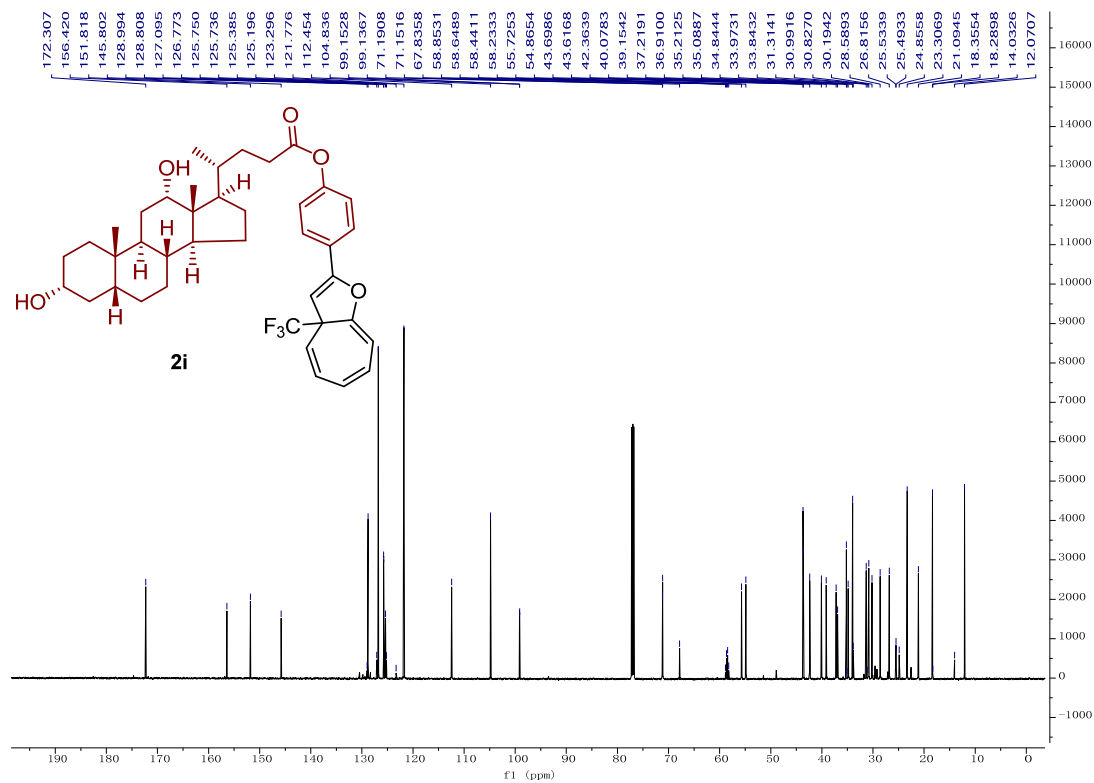



$^{19}\text{F}$  NMR (565 MHz,  $\text{CDCl}_3$ ) of compound **2i**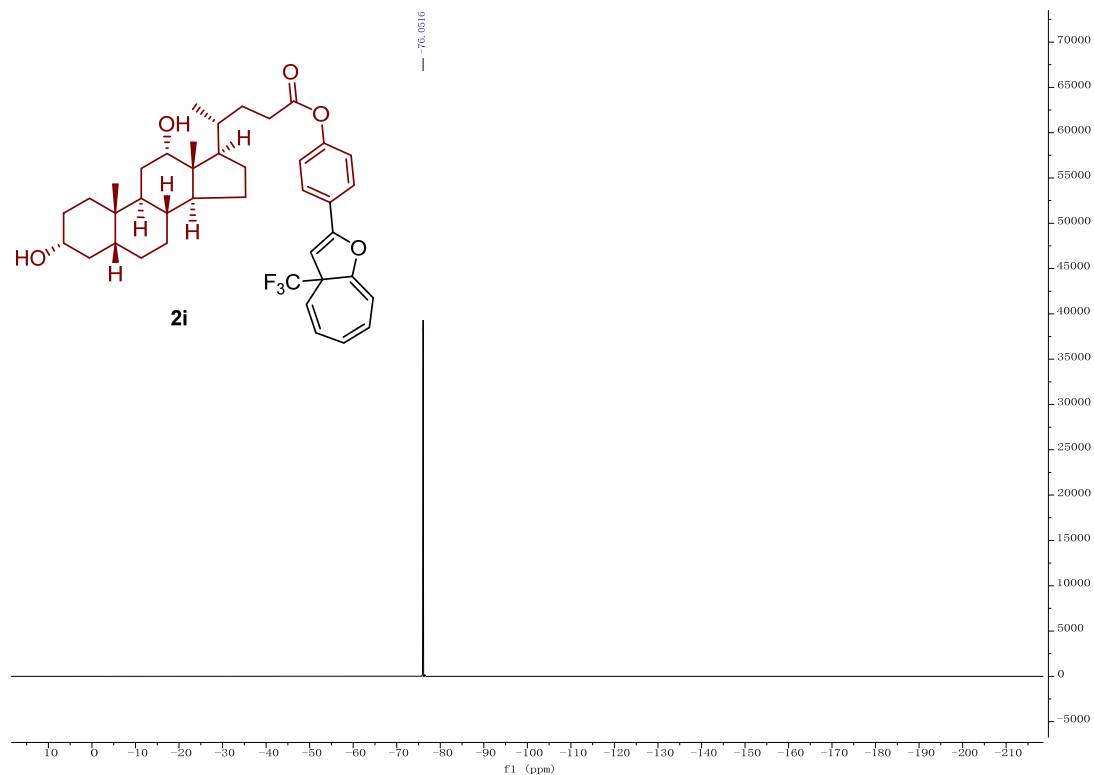 $^1\text{H}$  NMR (400 MHz,  $\text{CDCl}_3$ ) of compound **2j**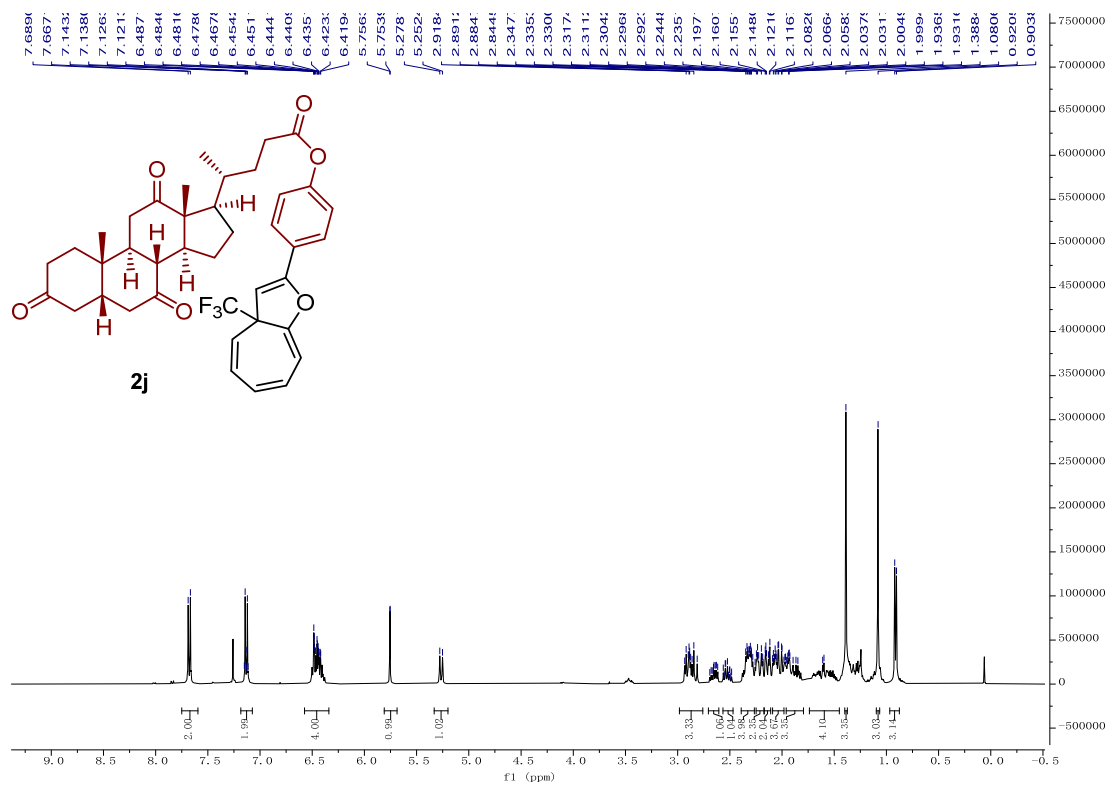

$^{13}\text{C}$  NMR (101 MHz,  $\text{CDCl}_3$ ) of compound **2j**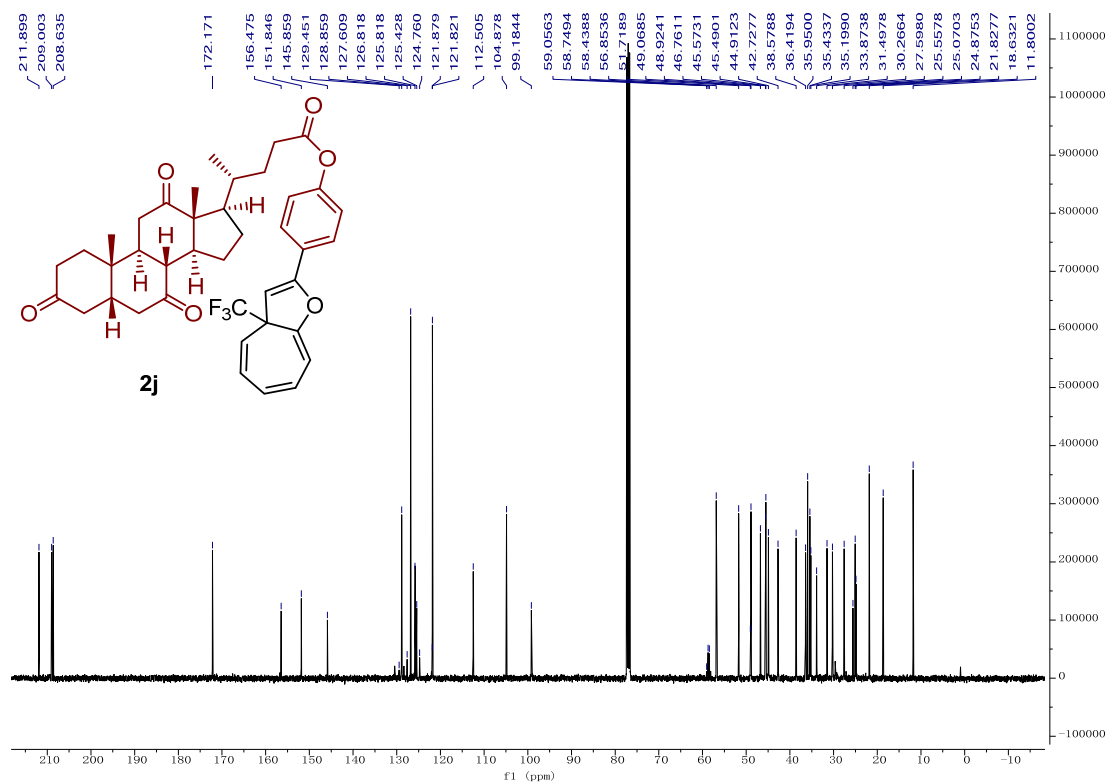 $^{19}\text{F}$  NMR (376 MHz,  $\text{CDCl}_3$ ) of compound **2j**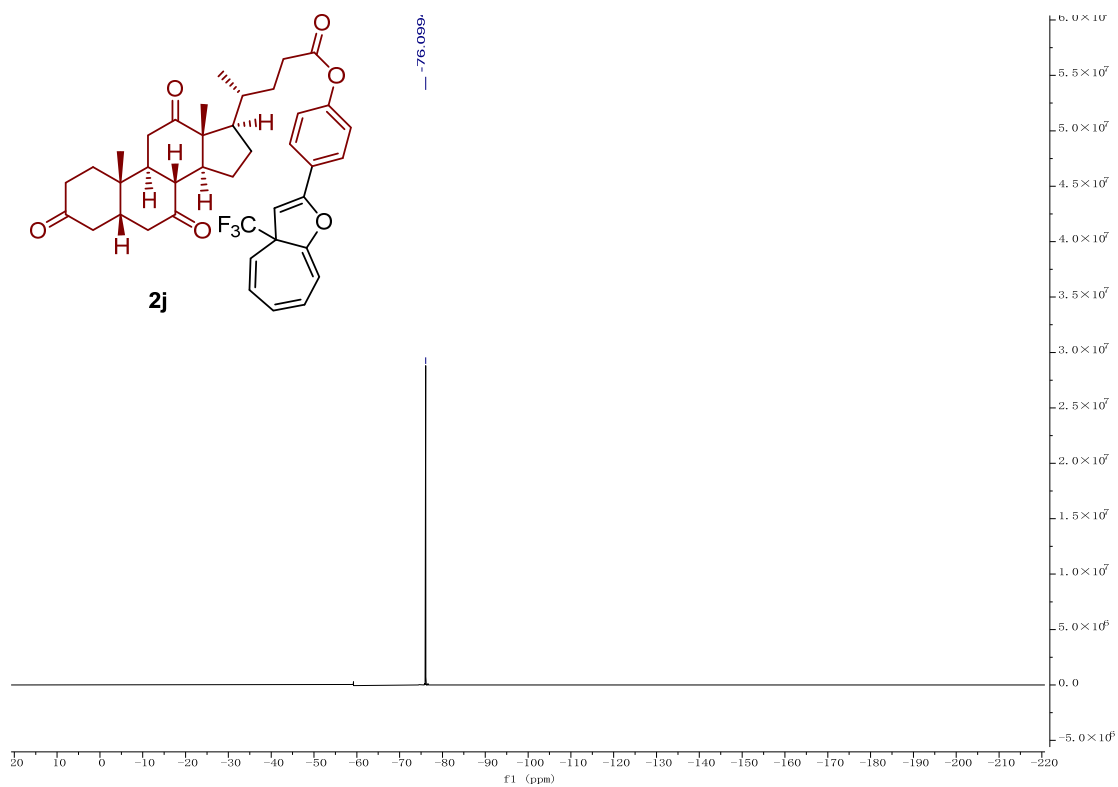

$^1\text{H}$  NMR (400 MHz,  $\text{CDCl}_3$ ) of compound **2k**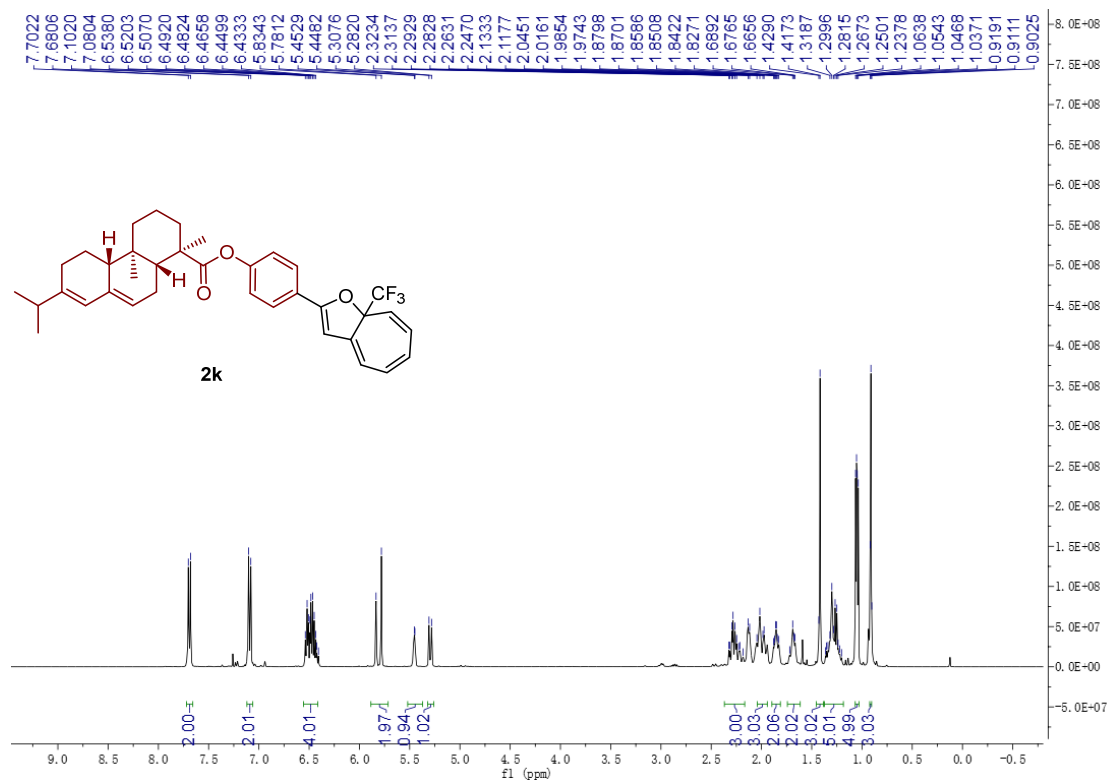 $^{13}\text{C}$  NMR (101 MHz,  $\text{CDCl}_3$ ) of compound **2k**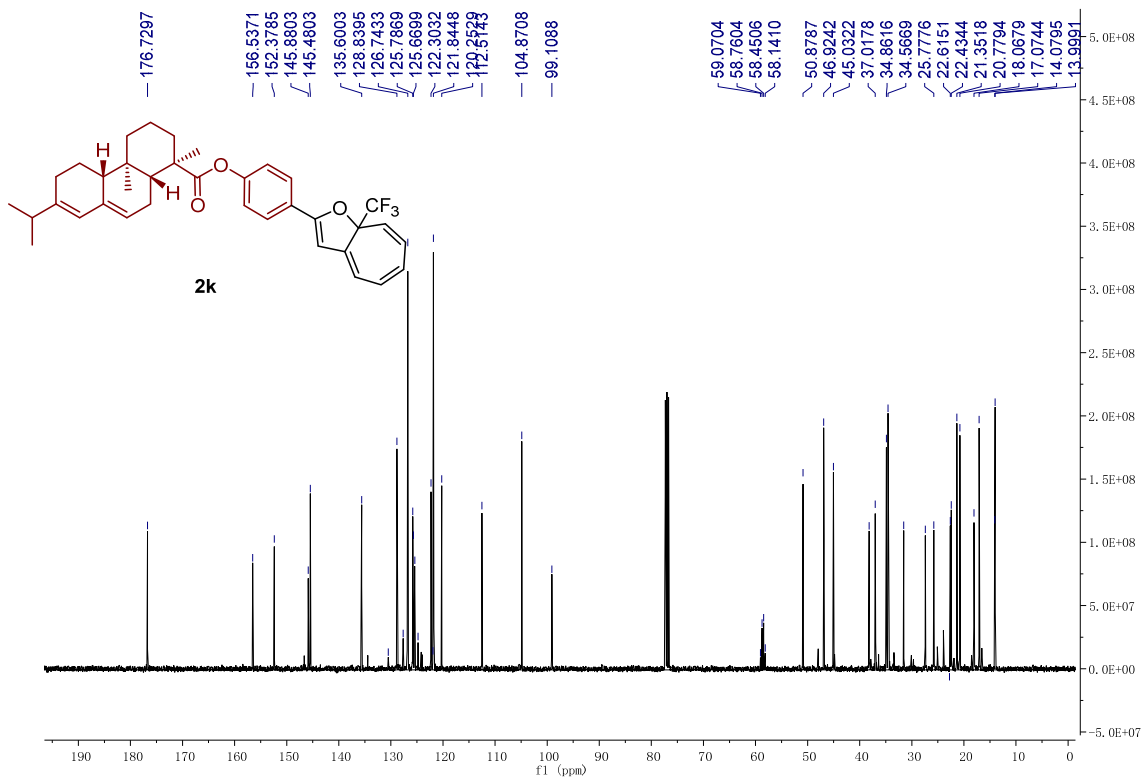

$^{19}\text{F}$  NMR (376 MHz,  $\text{CDCl}_3$ ) of compound **2k**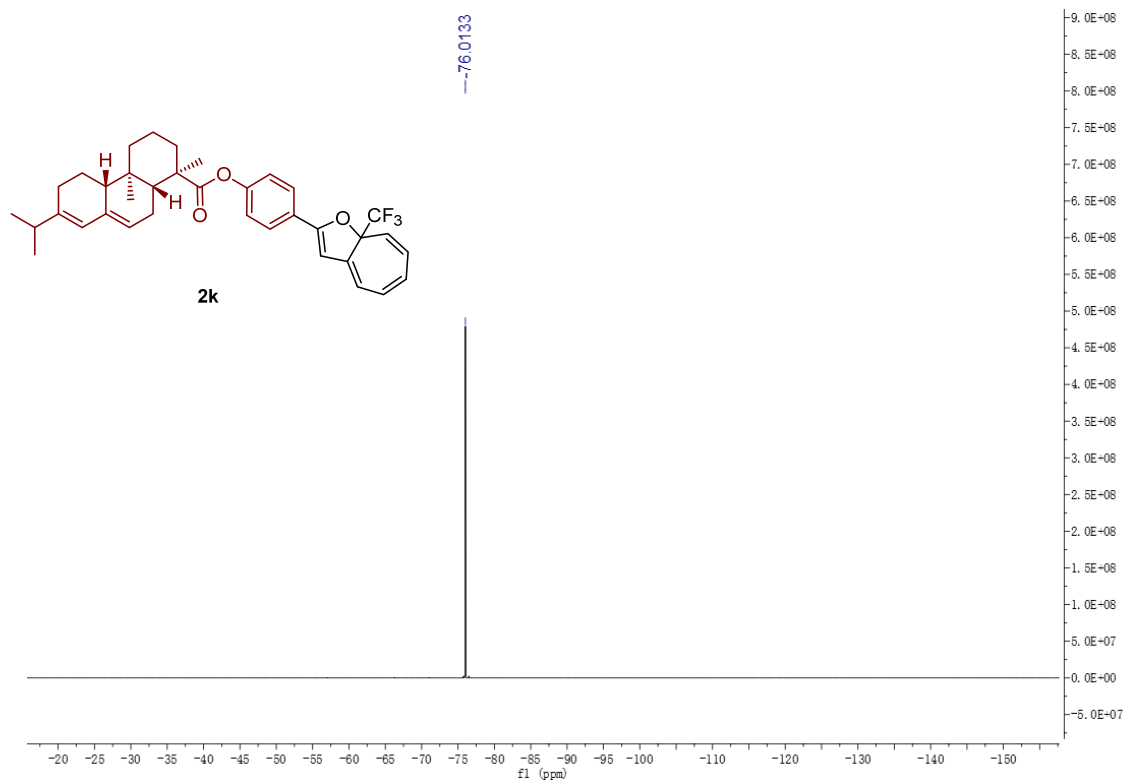 $^1\text{H}$  NMR (400 MHz,  $\text{CDCl}_3$ ) of compound **2l**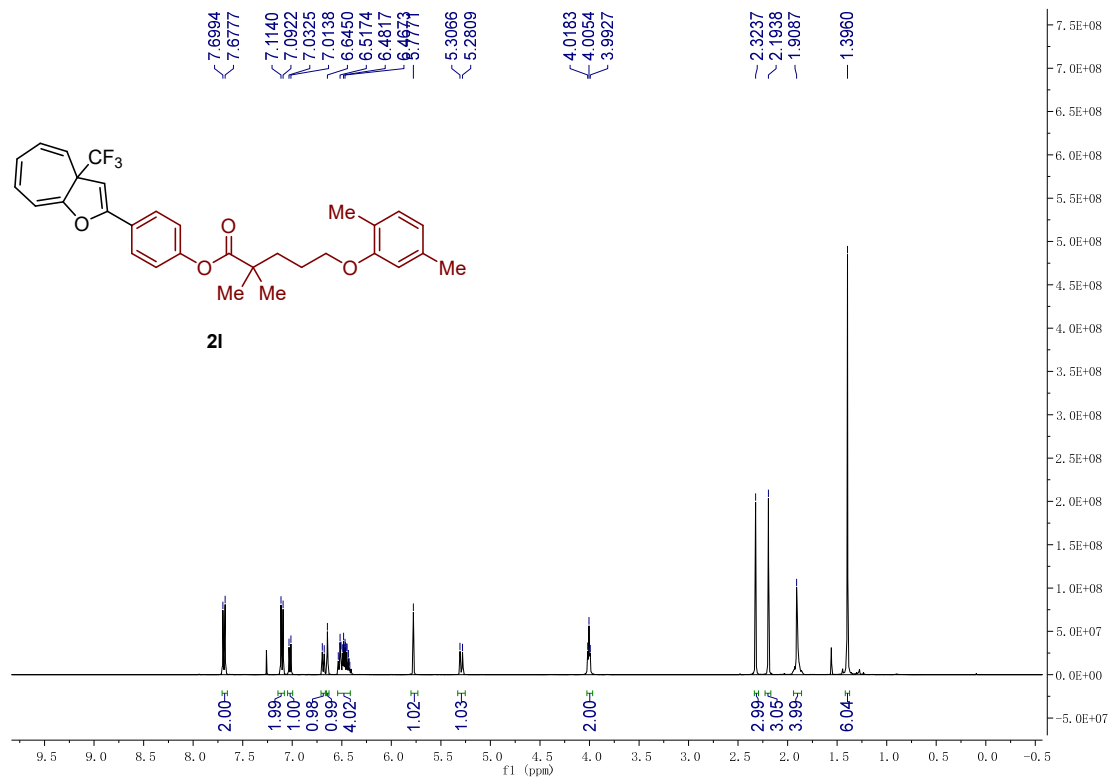

$^{13}\text{C}$  NMR (101 MHz,  $\text{CDCl}_3$ ) of compound **2I**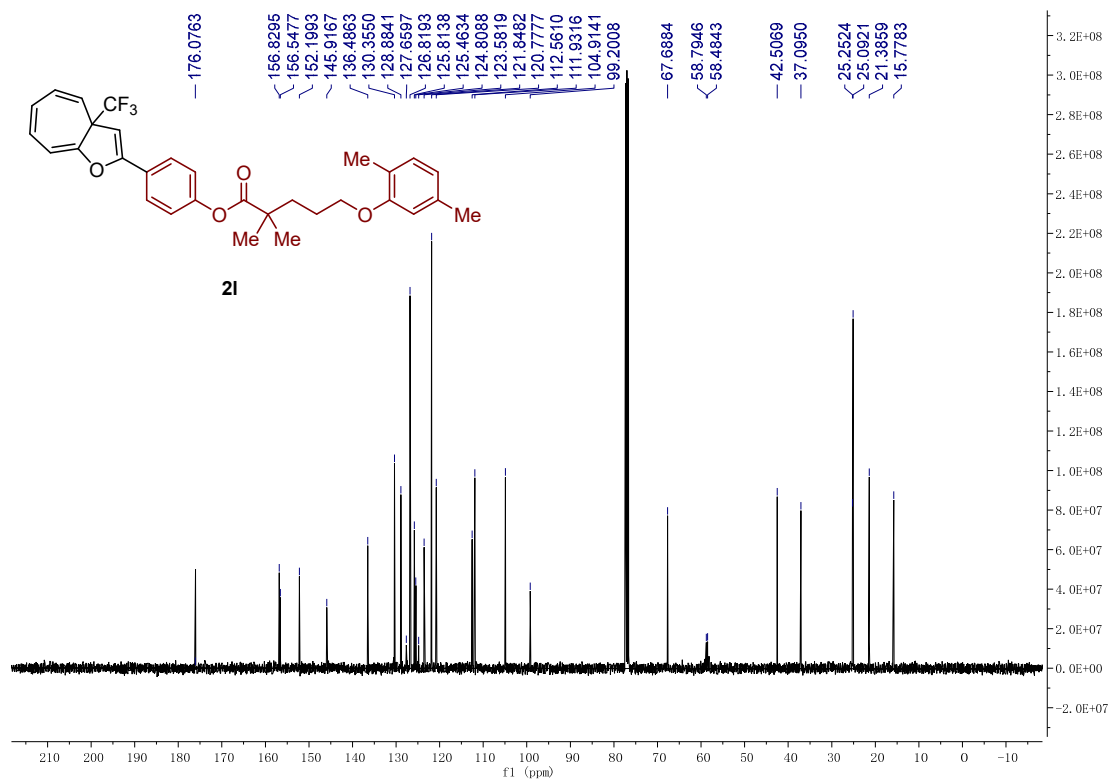 $^{19}\text{F}$  NMR (376 MHz,  $\text{CDCl}_3$ ) of compound **2I**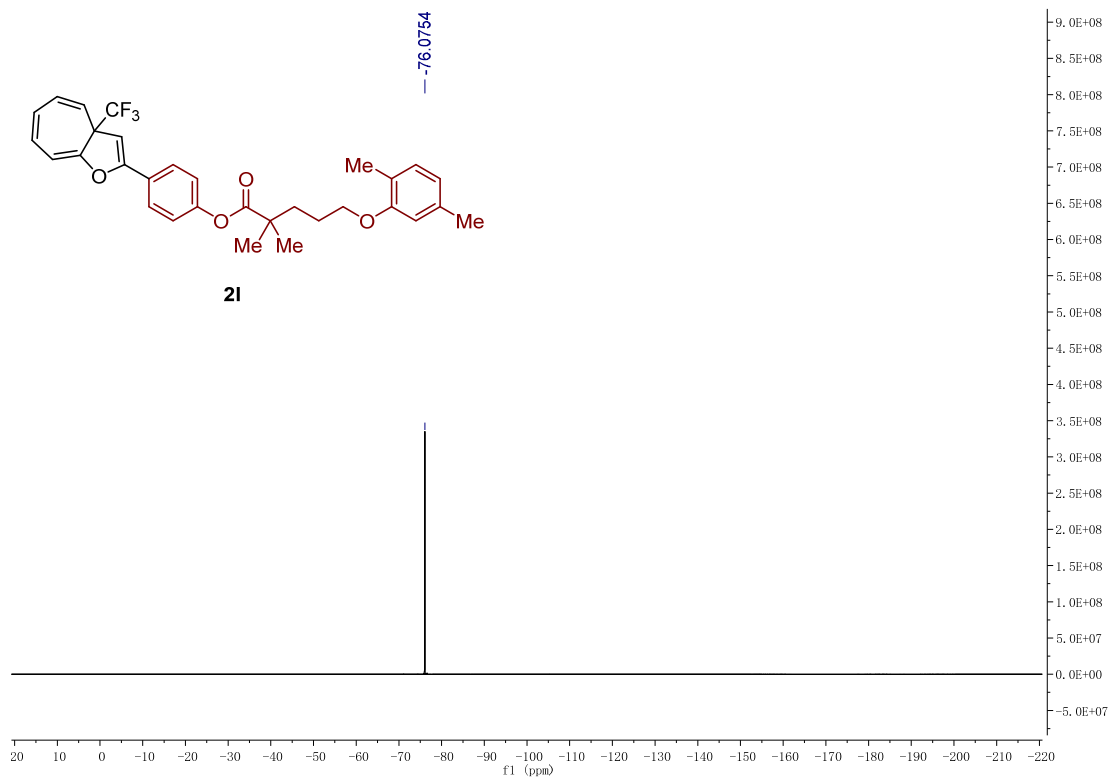

$^1\text{H}$  NMR (600 MHz,  $\text{CDCl}_3$ ) of compound **2m**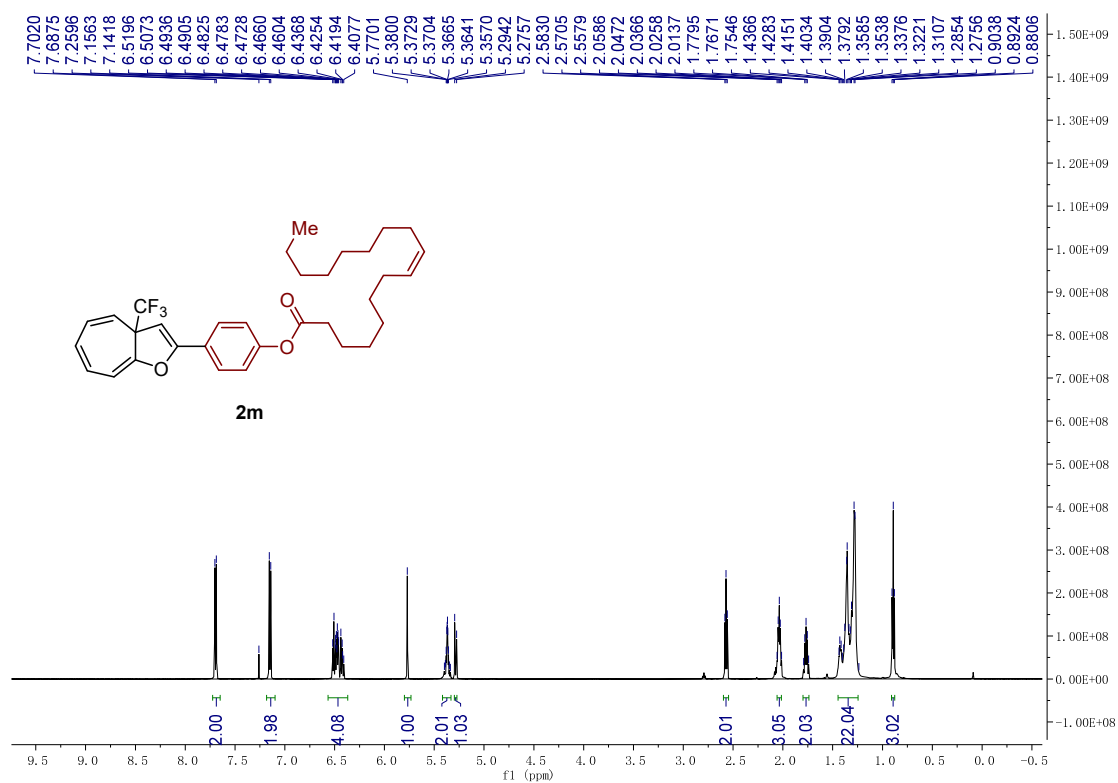 $^{13}\text{C}$  NMR (151 MHz,  $\text{CDCl}_3$ ) of compound **2m**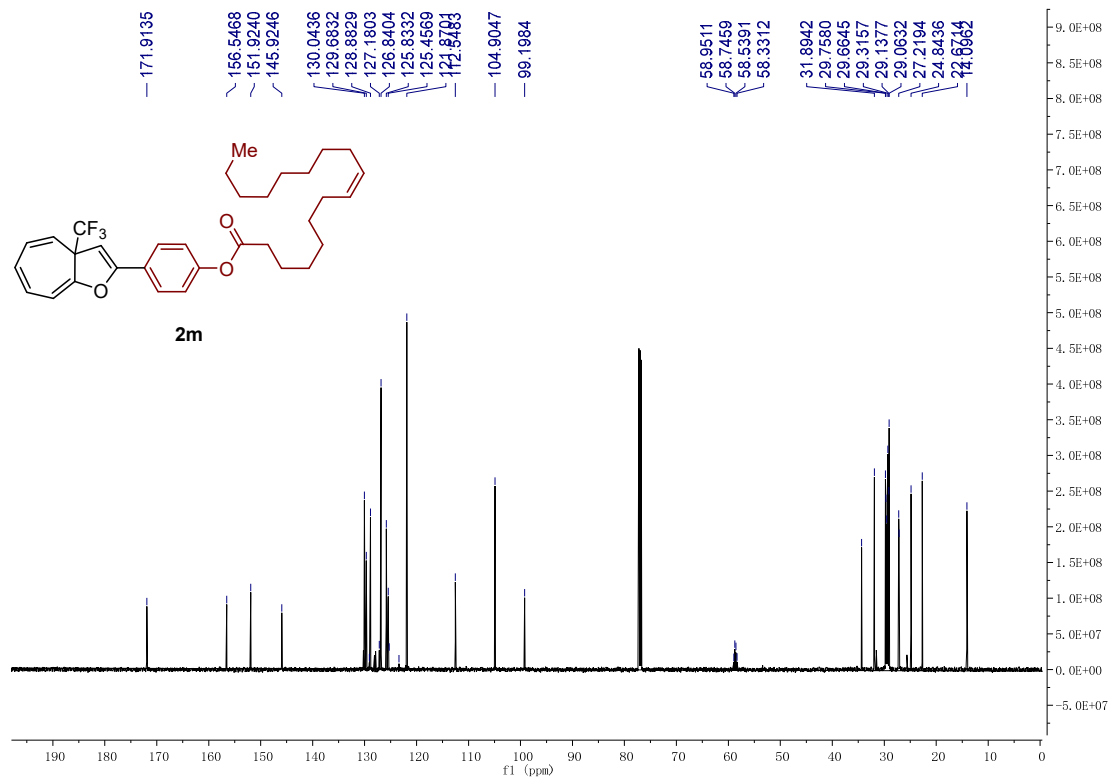

$^{19}\text{F}$  NMR (565 MHz,  $\text{CDCl}_3$ ) of compound **2m**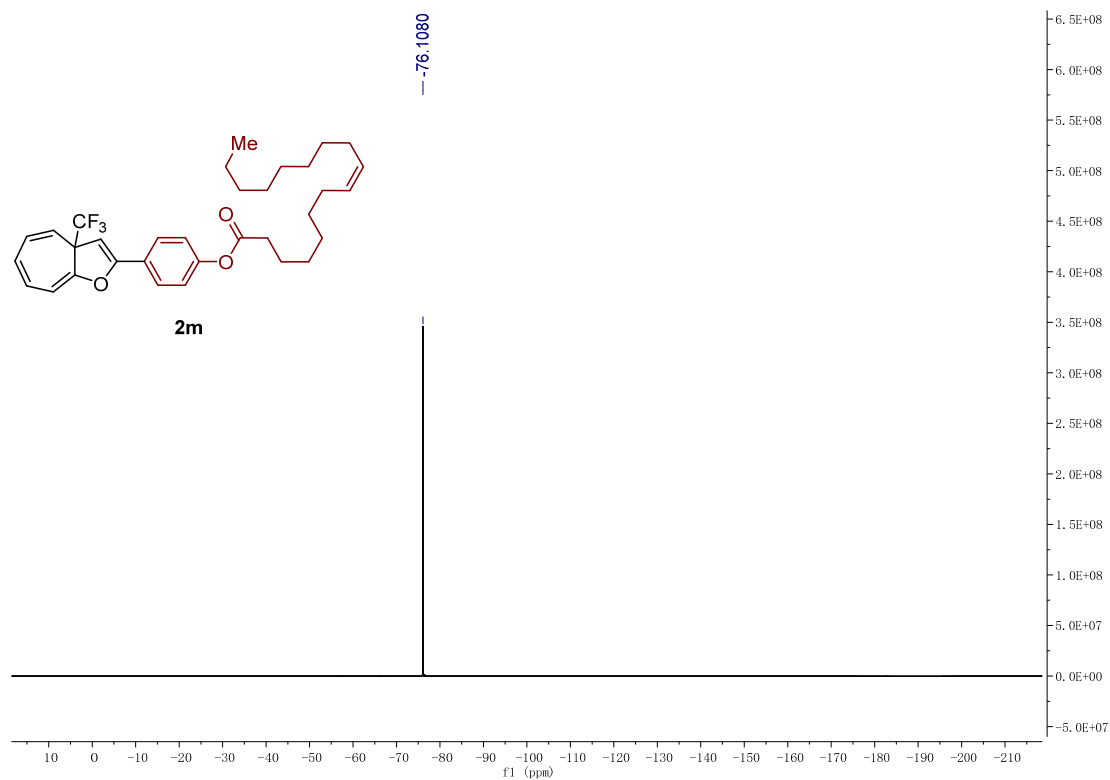 $^1\text{H}$  NMR (300 MHz,  $\text{CDCl}_3$ ) of compound **2n**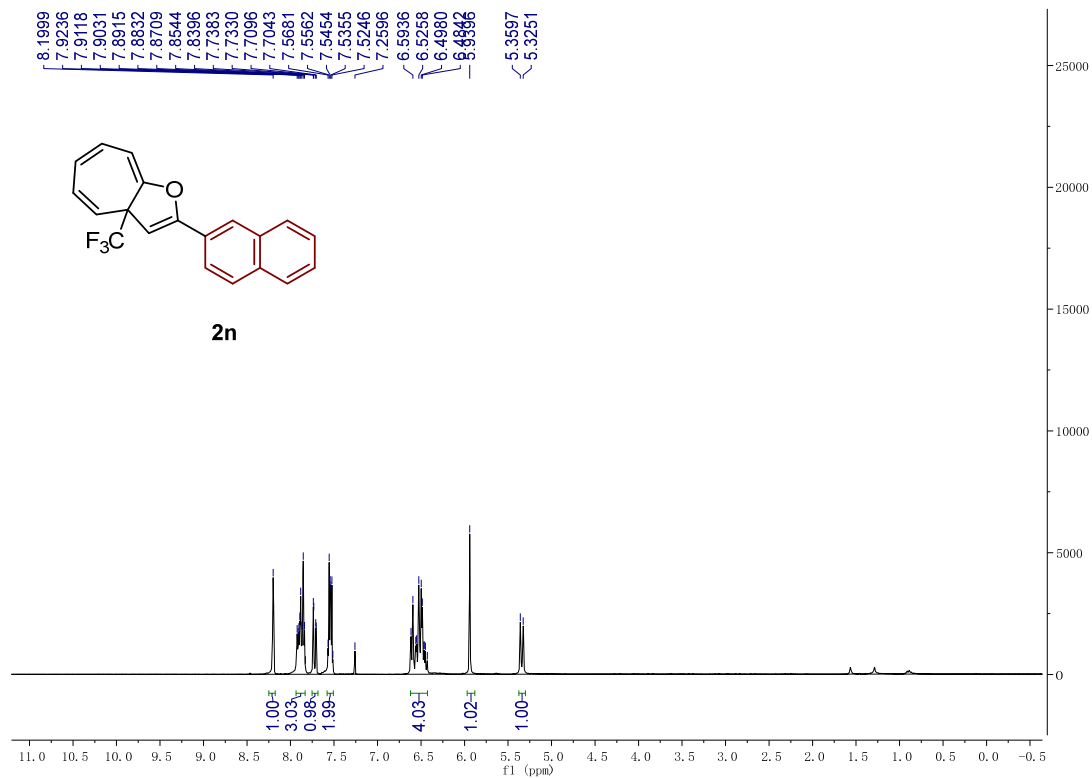

$^{13}\text{C}$  NMR (75 MHz,  $\text{CDCl}_3$ ) of compound **2n**

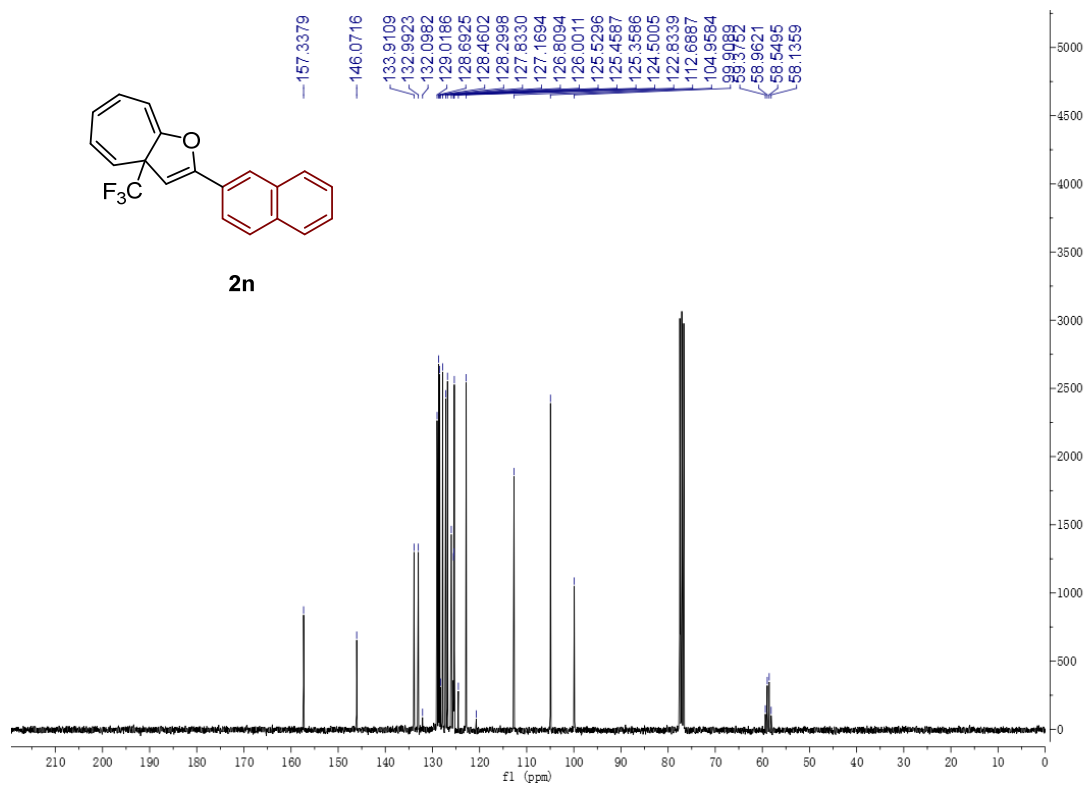

$^{19}\text{F}$  NMR (565 MHz,  $\text{CDCl}_3$ )  $\delta$  -76.0 of compound **2n**

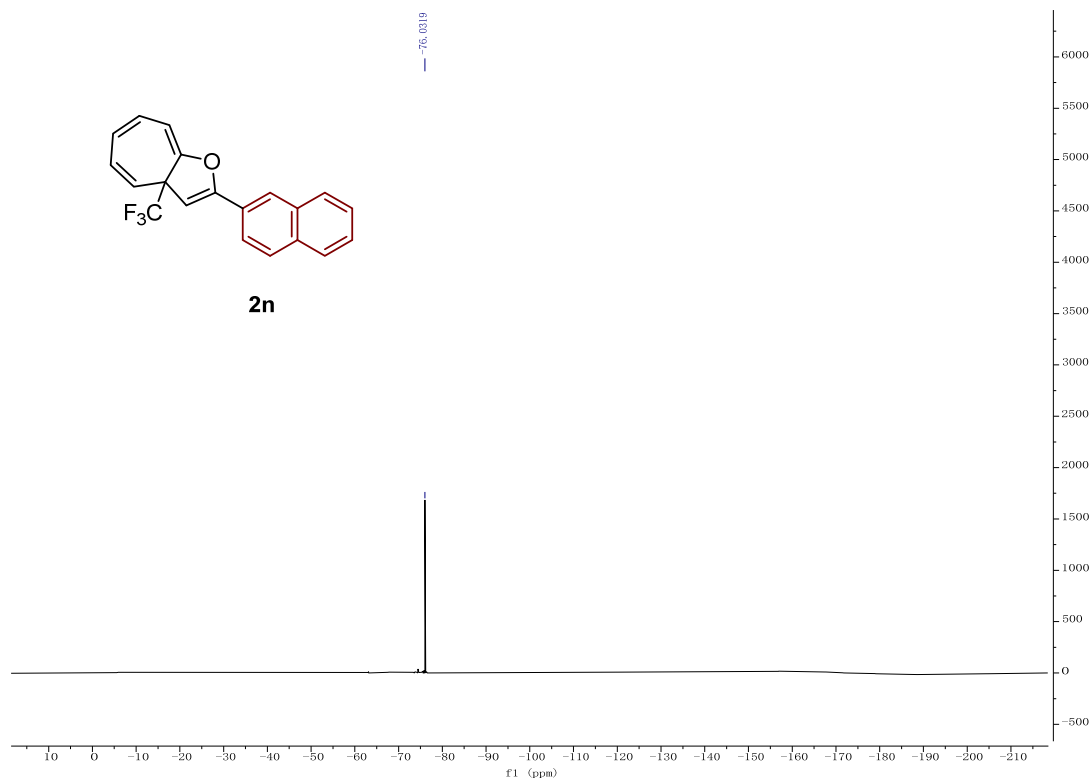



$^1\text{H}$  NMR (600 MHz,  $\text{CDCl}_3$ ) of compound **2o**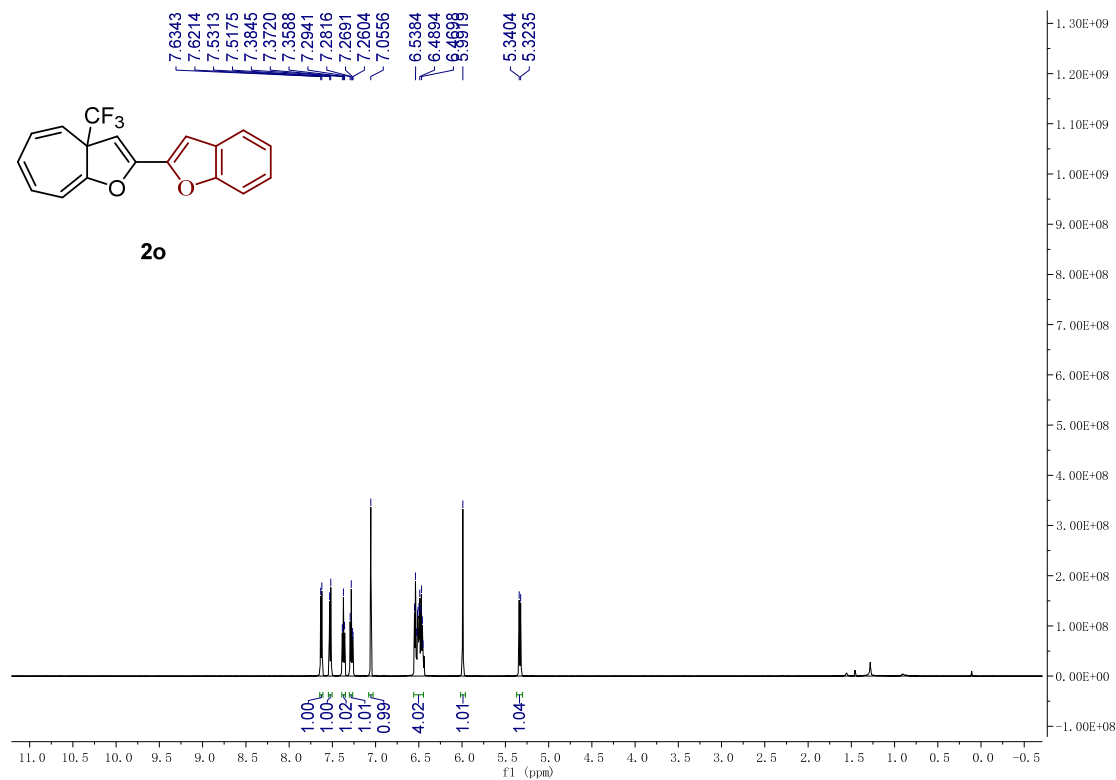 $^{13}\text{C}$  NMR (151 MHz,  $\text{CDCl}_3$ ) of compound **2o**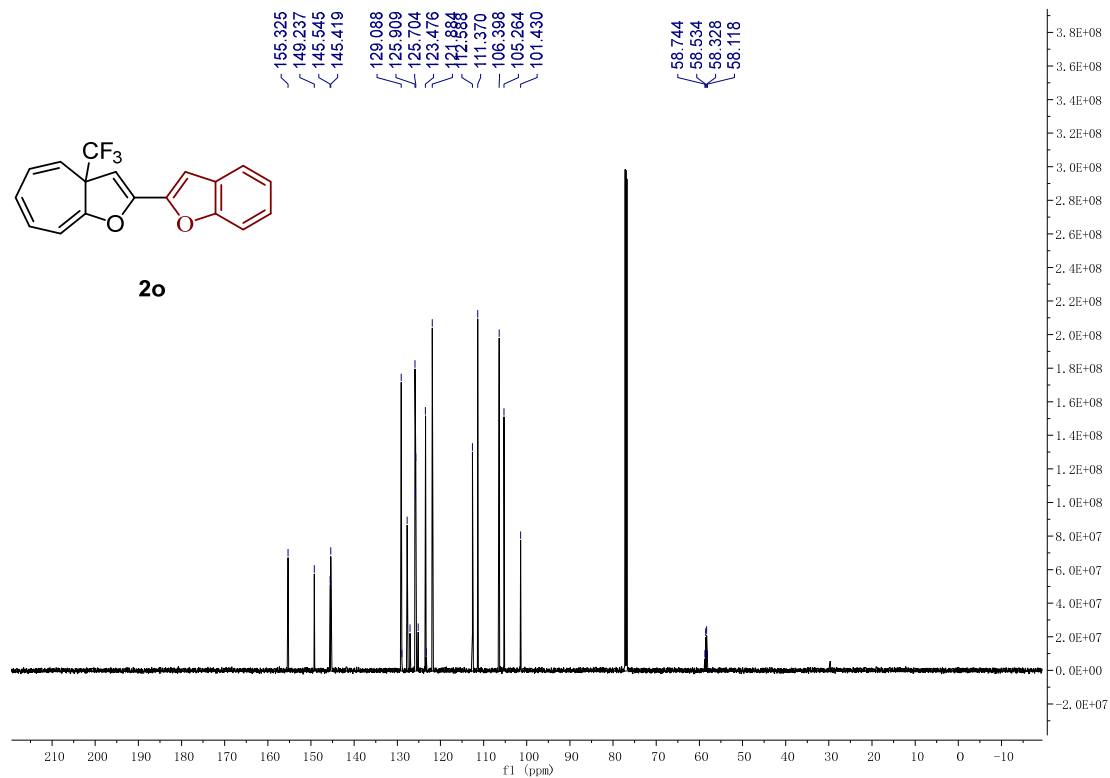

$^{19}\text{F}$  NMR (565 MHz,  $\text{CDCl}_3$ ) of compound **2o**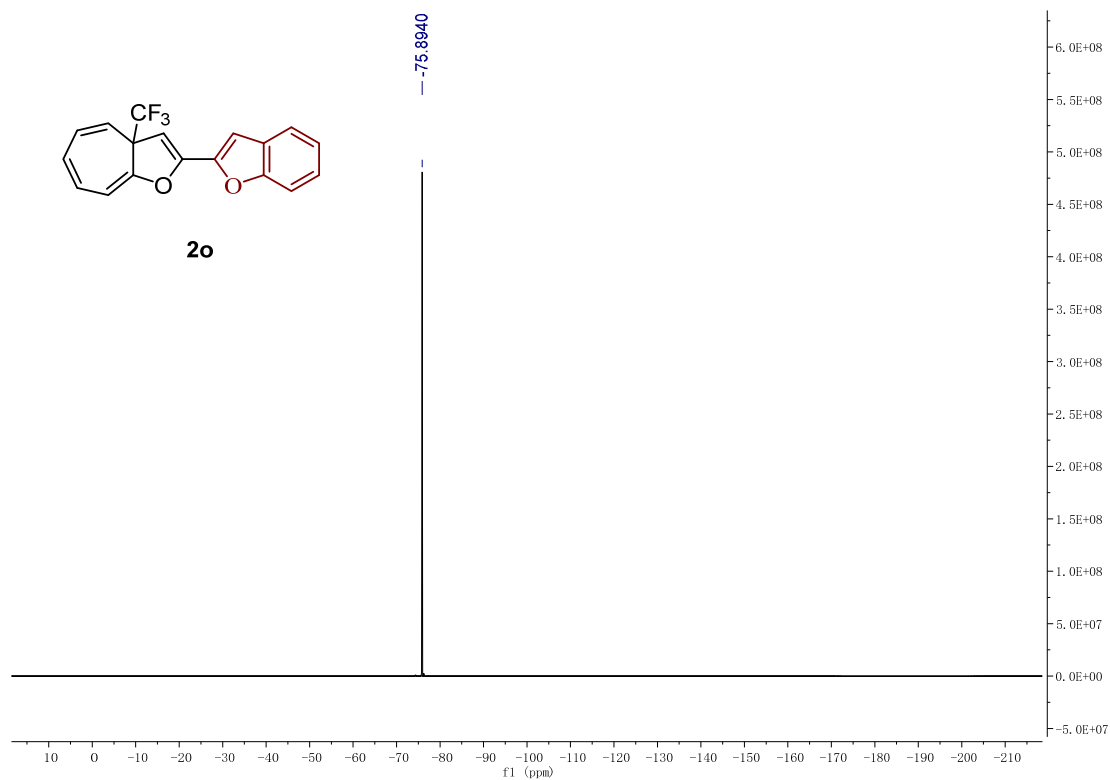 $^1\text{H}$  NMR (400 MHz,  $\text{CDCl}_3$ ) of compound **2p**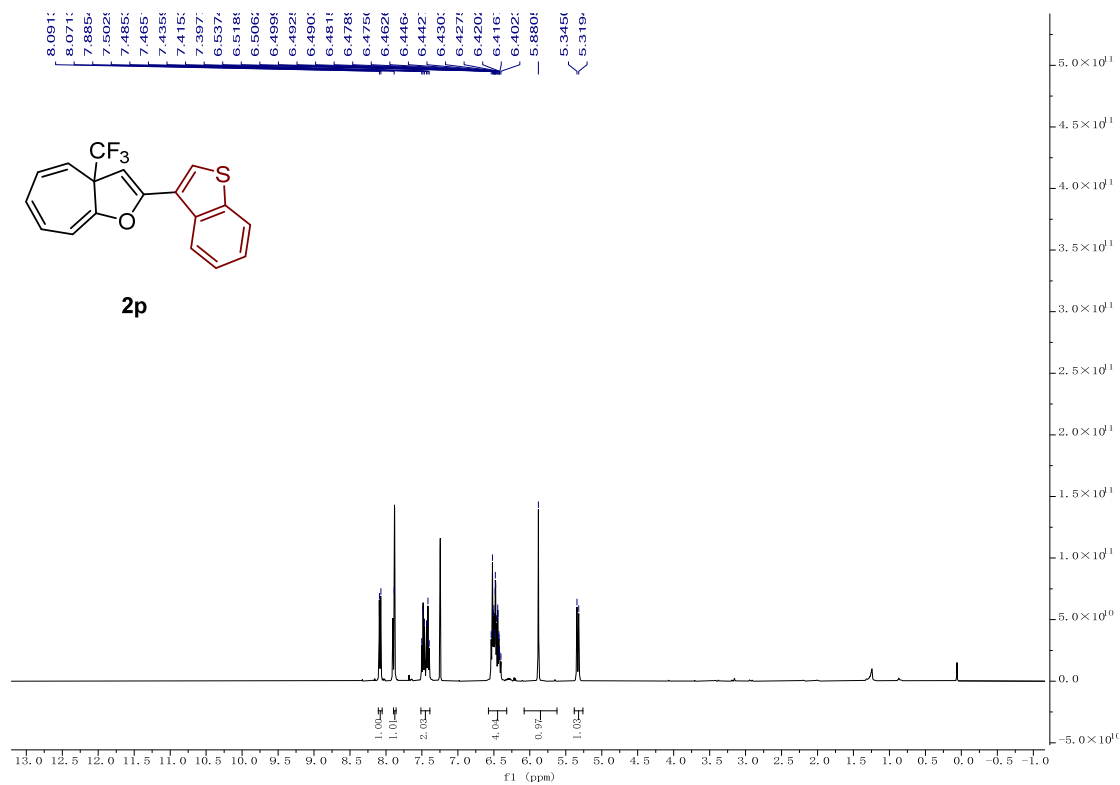

$^{13}\text{C}$  NMR (151 MHz,  $\text{CDCl}_3$ ) of compound **2p**

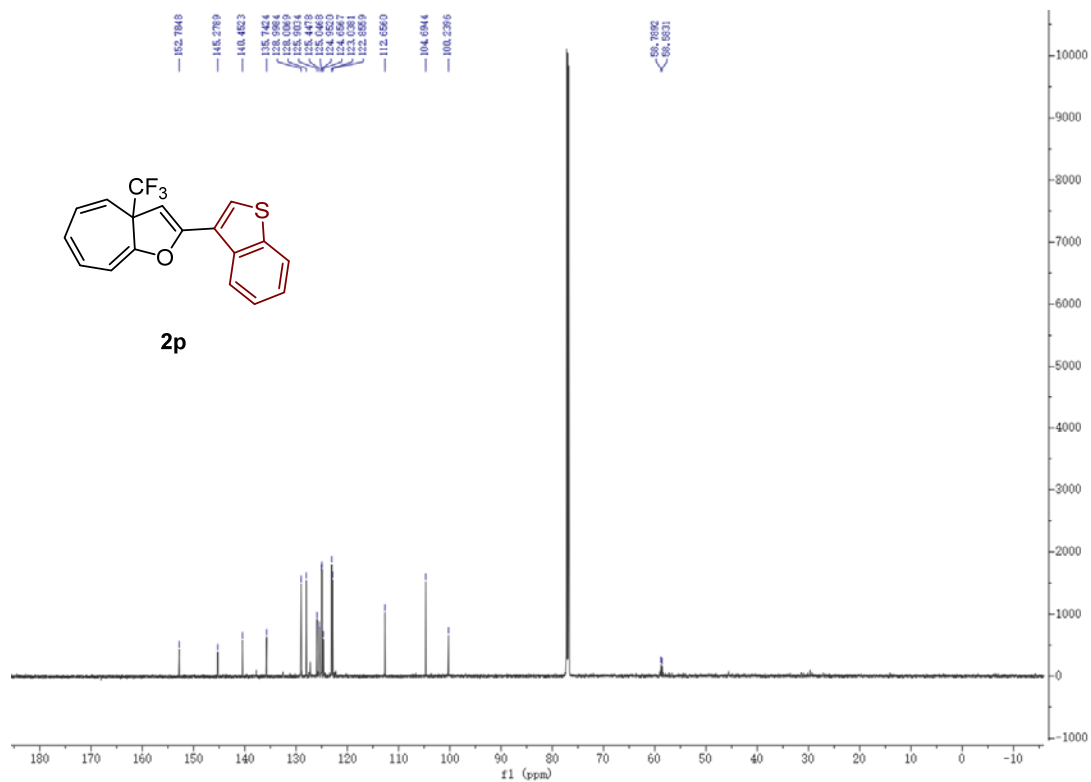

$^{19}\text{F}$  NMR (565 MHz,  $\text{CDCl}_3$ ) of compound **2p**

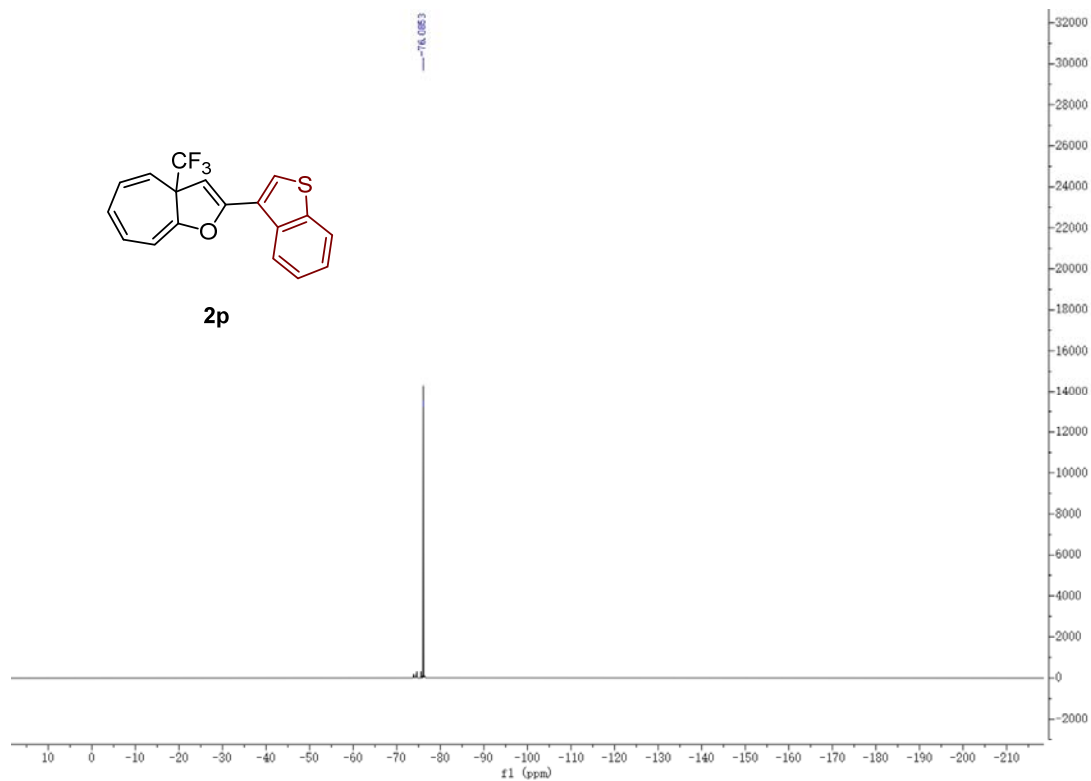

$^1\text{H}$  NMR (600 MHz,  $\text{CDCl}_3$ ) of compound **2q**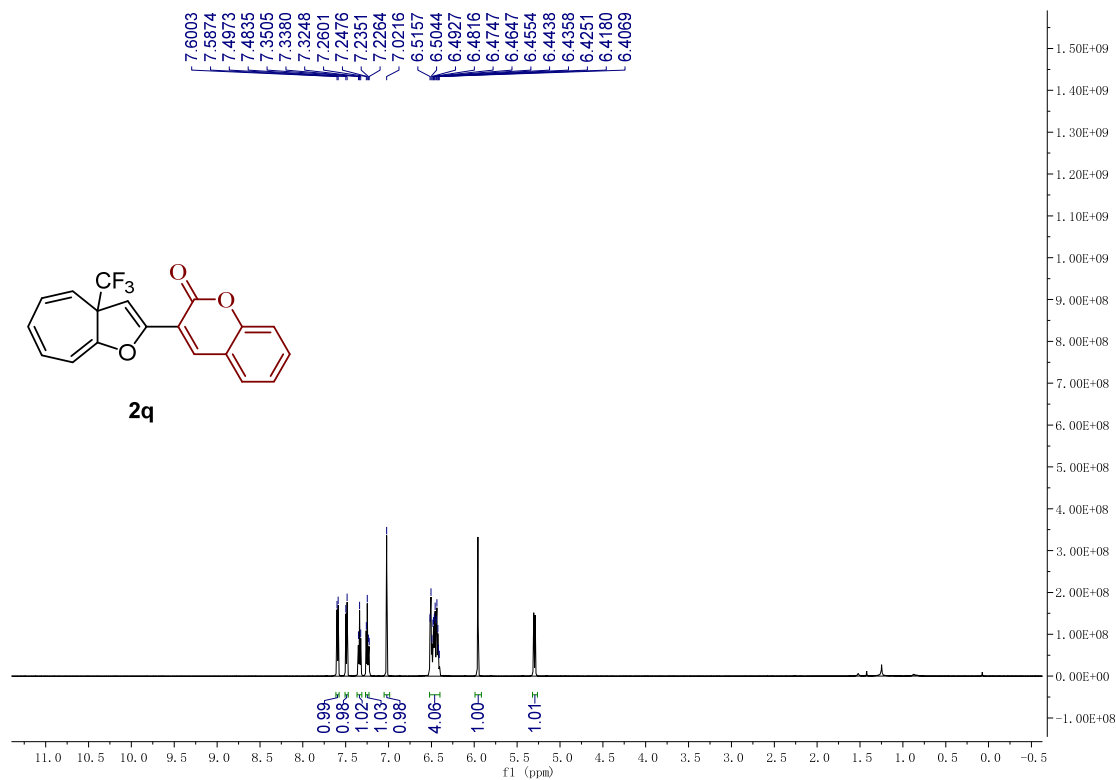 $^{13}\text{C}$  NMR (151 MHz,  $\text{CDCl}_3$ ) of compound of **2q**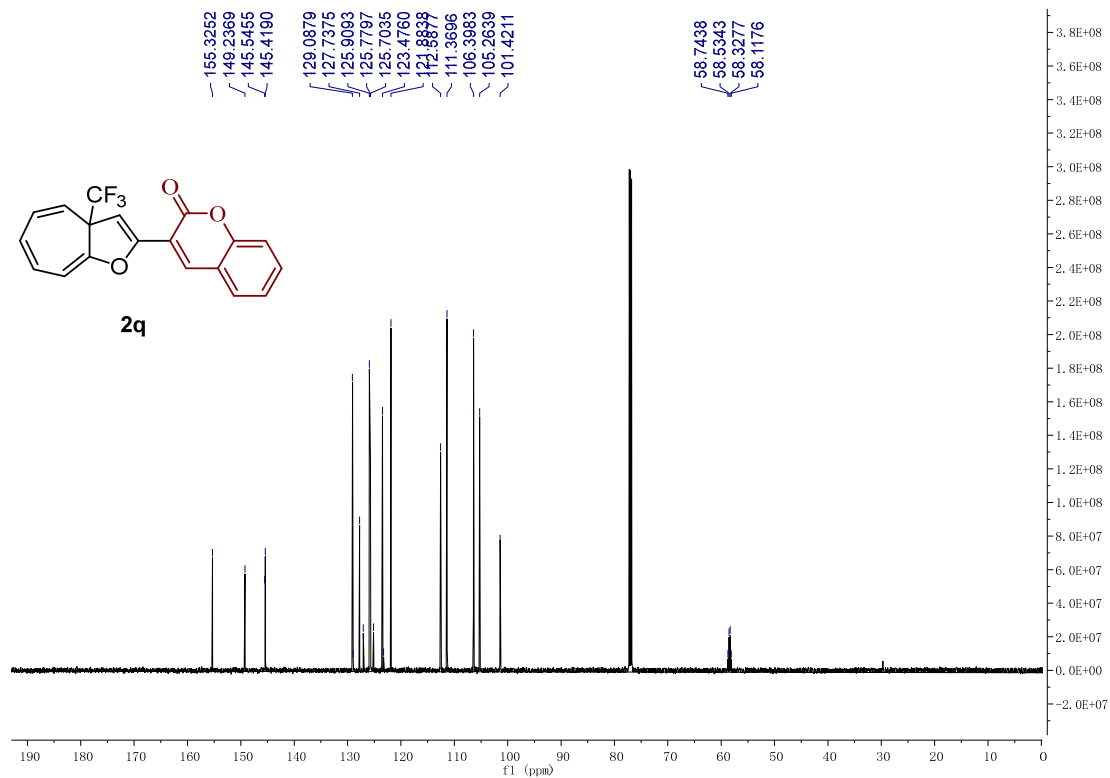

$^{19}\text{F}$  NMR (565 MHz,  $\text{CDCl}_3$ ) of compound **2q**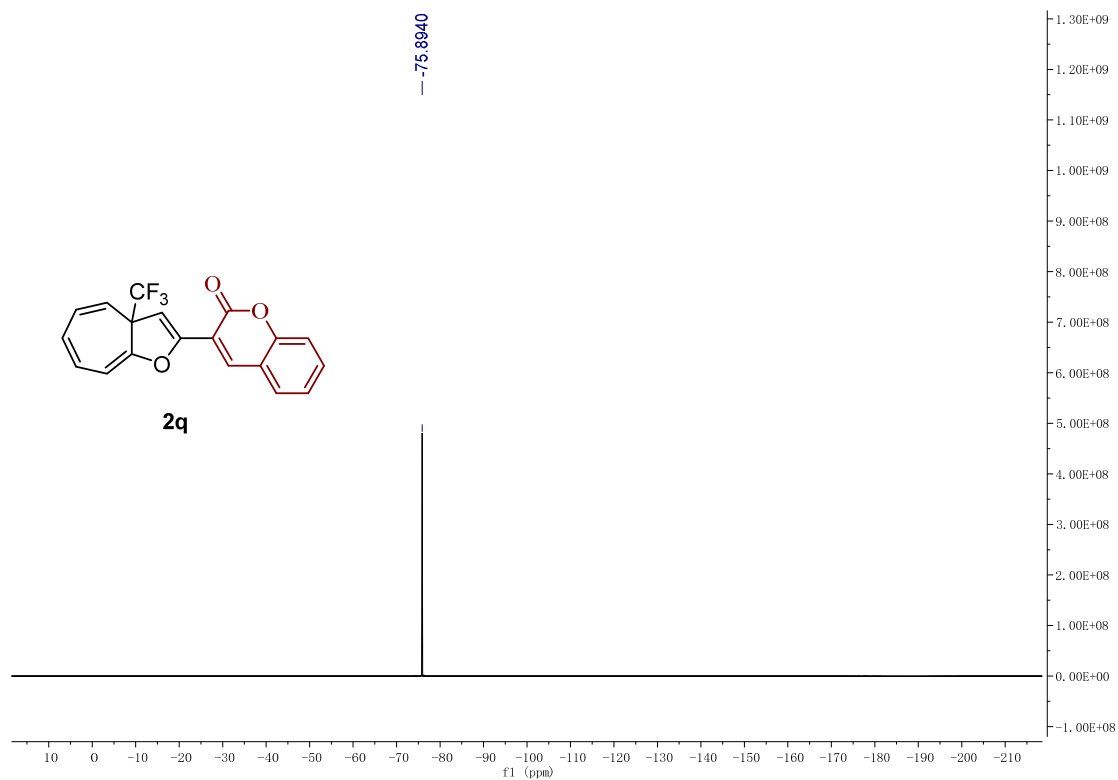 $^1\text{H}$  NMR (400 MHz,  $\text{CDCl}_3$ ) of compound **2r**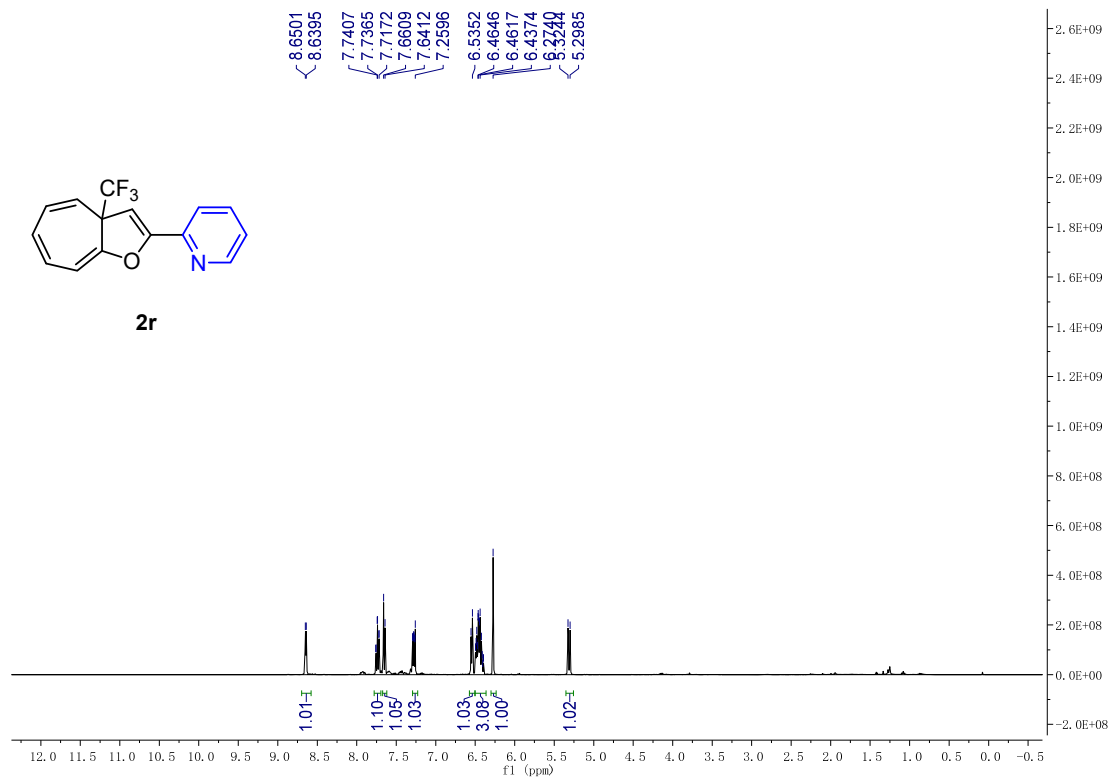

$^{13}\text{C}$  NMR (101 MHz,  $\text{CDCl}_3$ ) of compound **2r**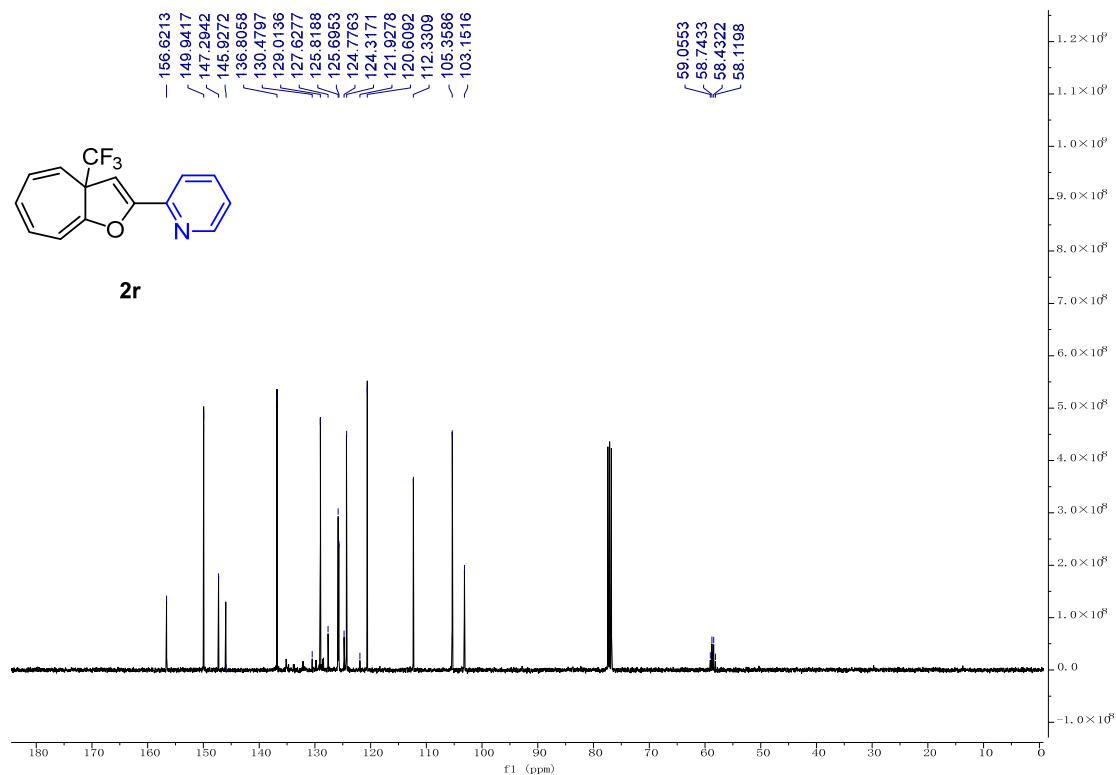 $^{19}\text{F}$  NMR (376 MHz,  $\text{CDCl}_3$ ) of compound **2r**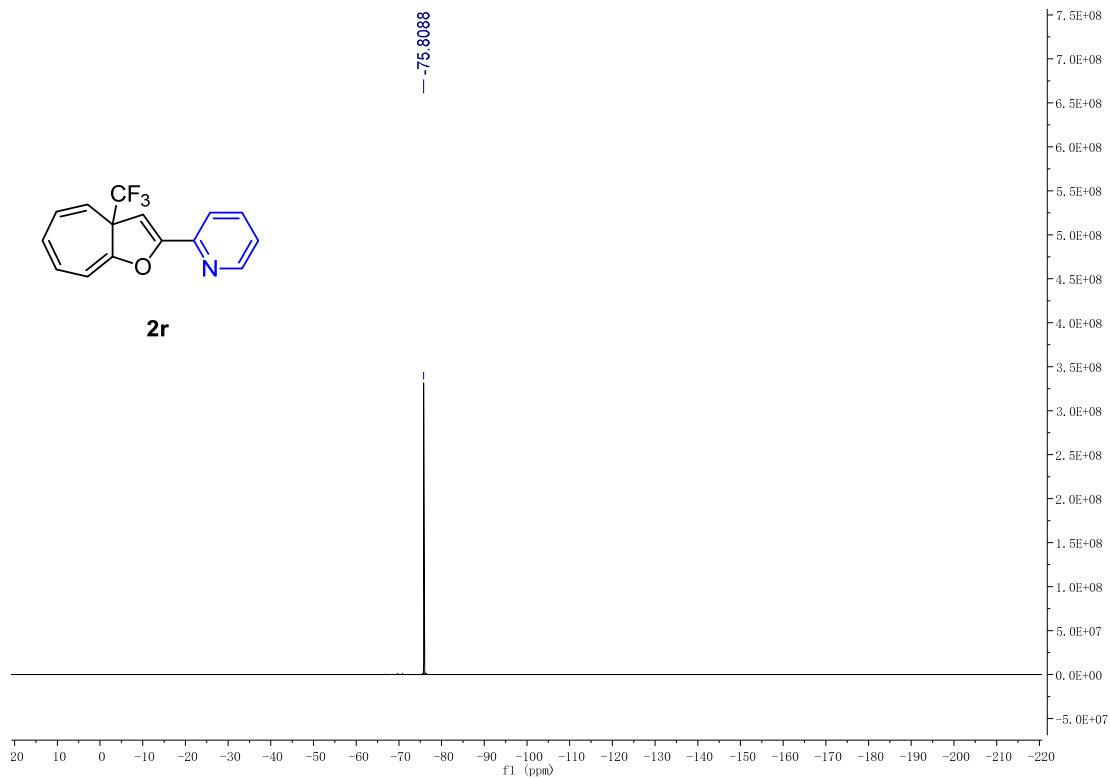

$^1\text{H}$  NMR (600 MHz,  $\text{CDCl}_2\text{CDCl}_2$ ) of compound **2s**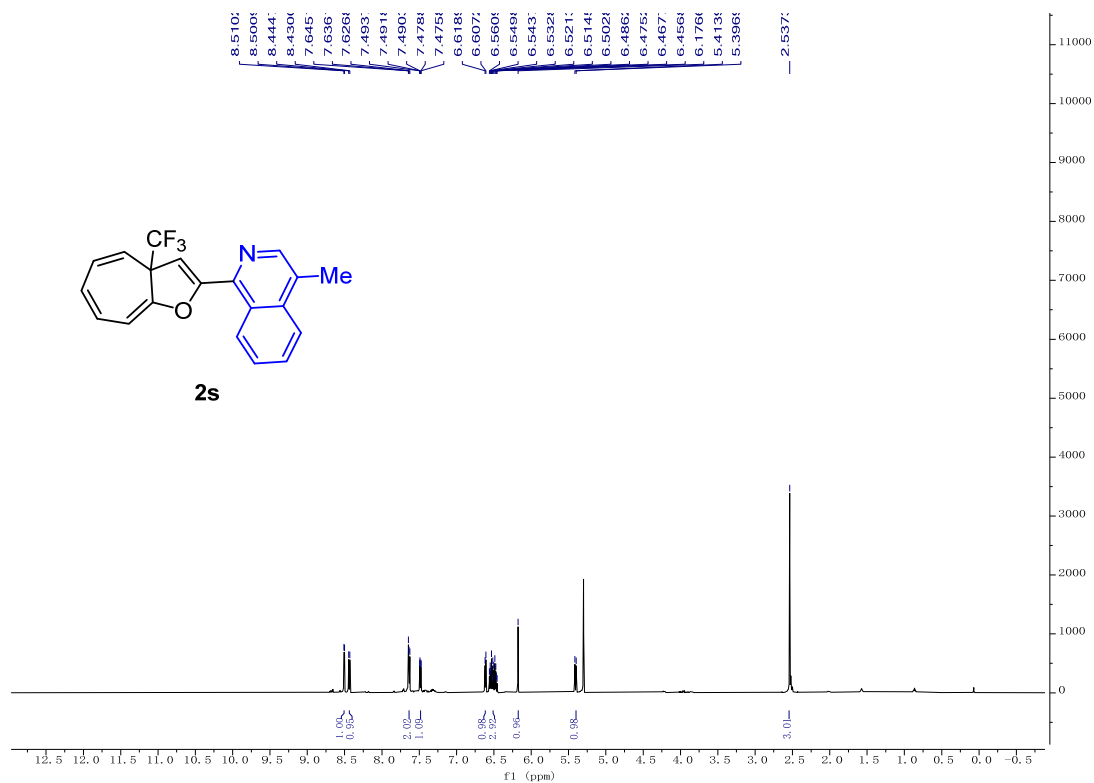 $^{13}\text{C}$  NMR (151 MHz,  $\text{CDCl}_2\text{CDCl}_2$ ) of compound **2s**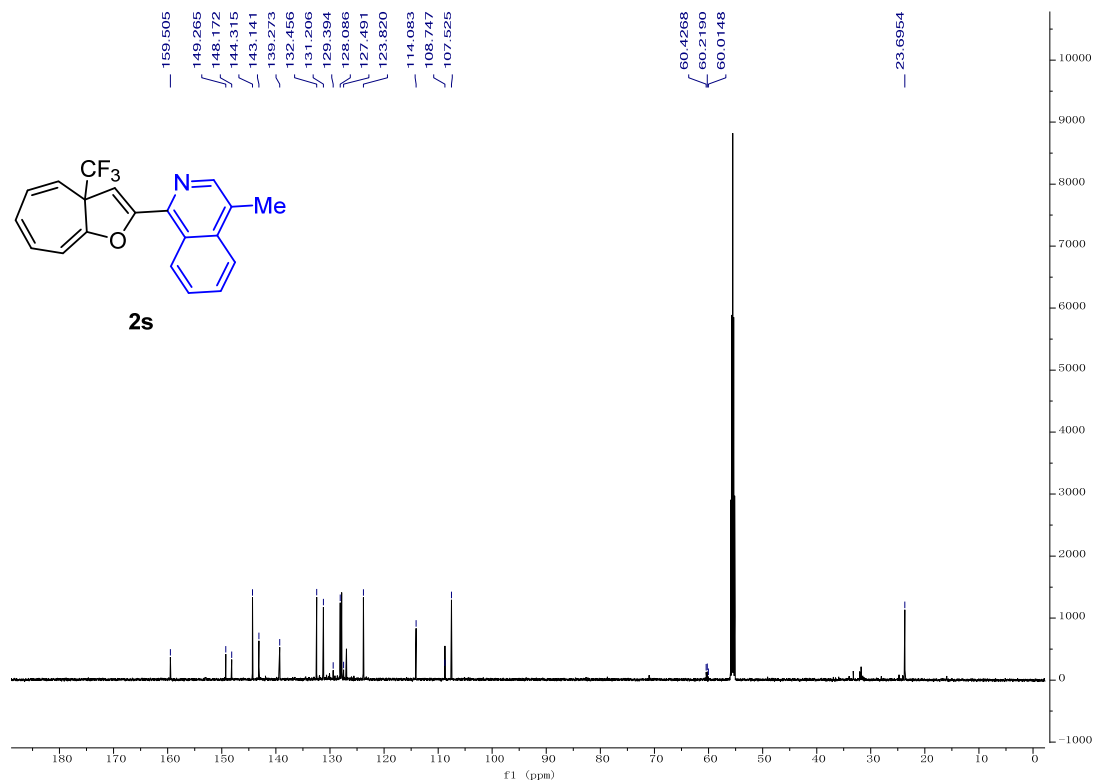

$^{19}\text{F}$  NMR (565 MHz,  $\text{CDCl}_2\text{CDCl}_2$ ) of compound **2s**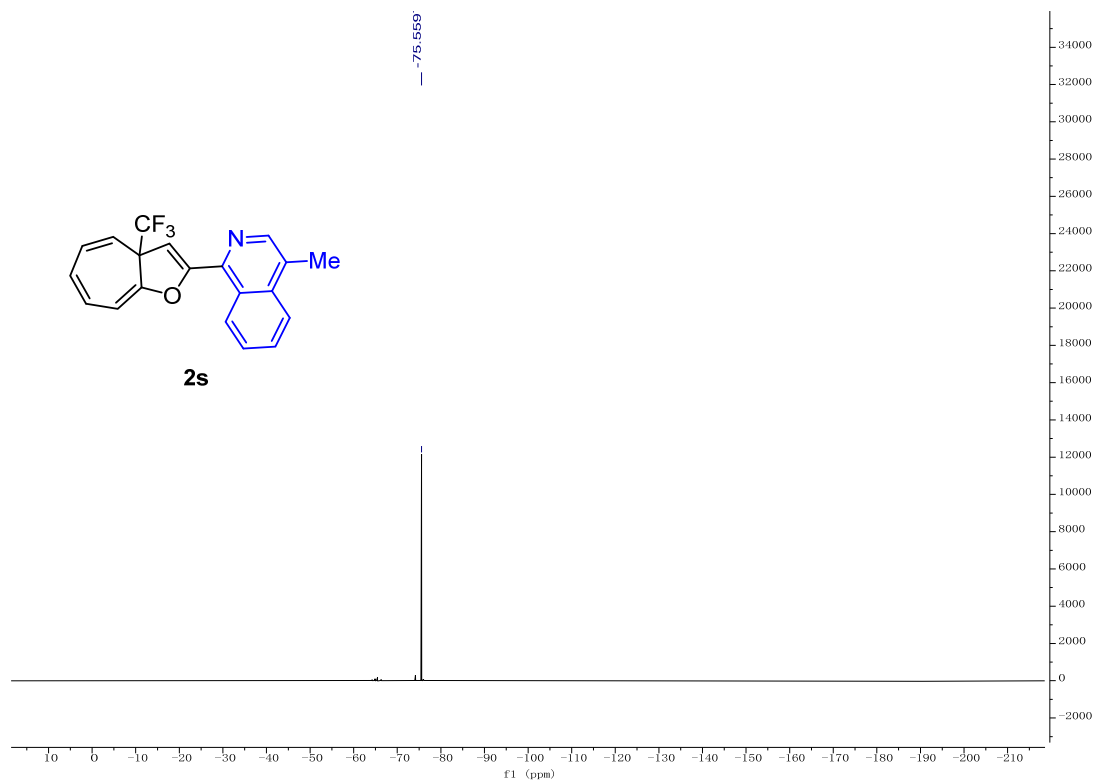 $^1\text{H}$  NMR (300 MHz,  $\text{CDCl}_3$ ) of compound **2t**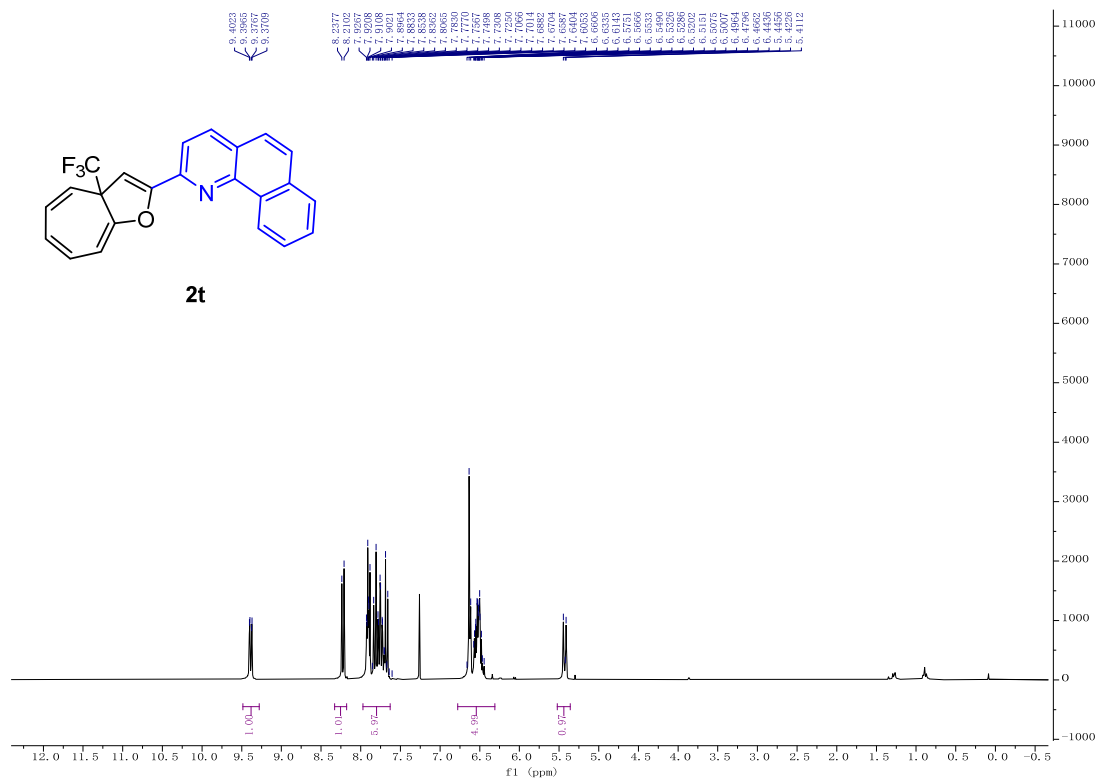



$^{13}\text{C}$  NMR (151 MHz,  $\text{CD}_2\text{Cl}_2$ ) of compound **2t**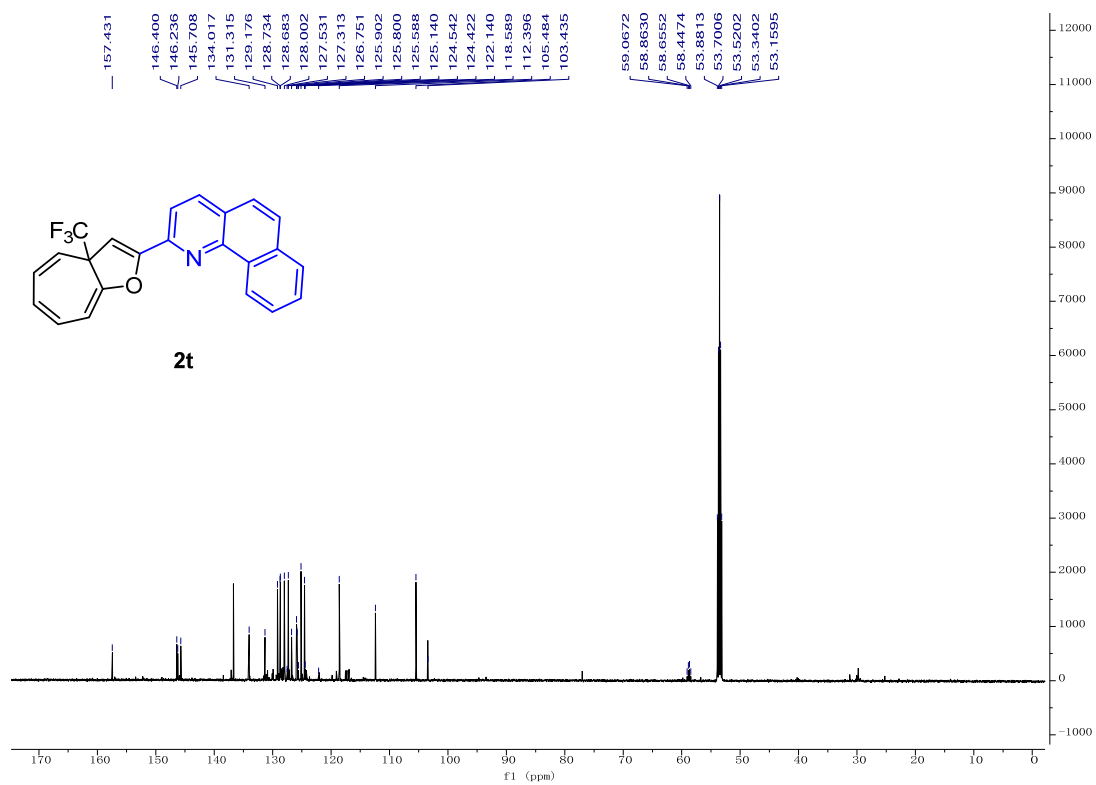 $^{19}\text{F}$  NMR (565 MHz,  $\text{CD}_2\text{Cl}_2$ ) of compound **2t**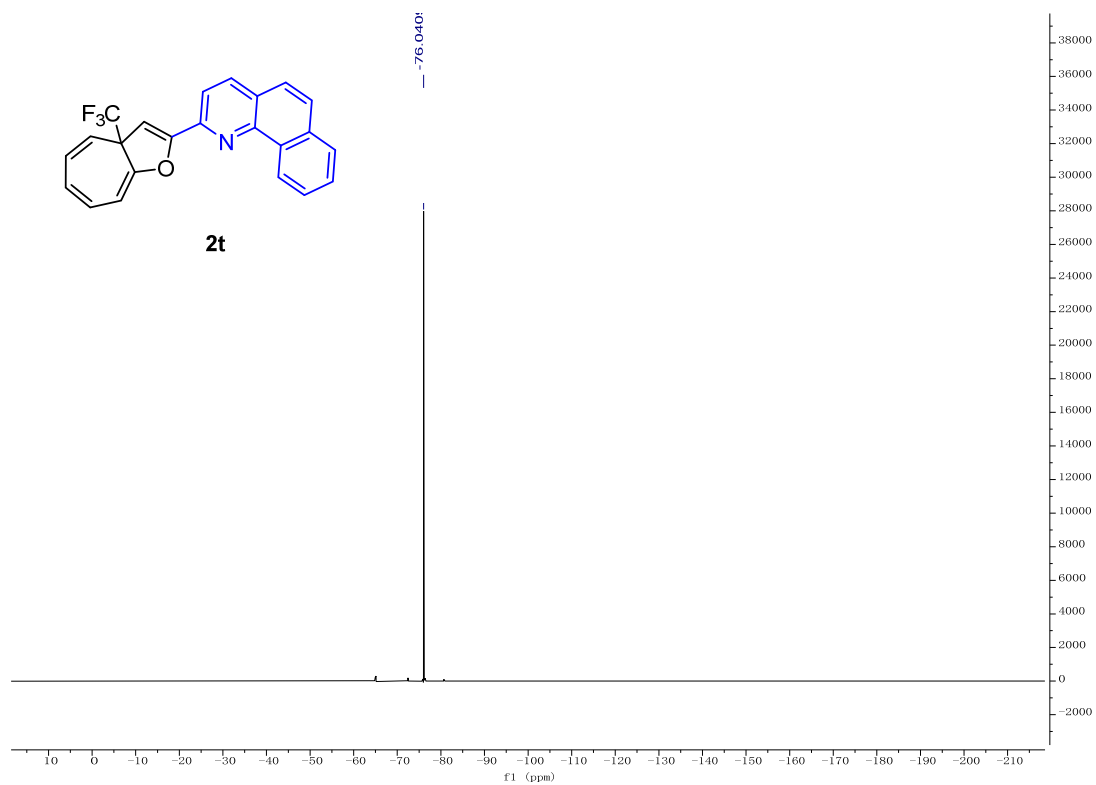

$^1\text{H}$  NMR (300 MHz,  $\text{CD}_2\text{Cl}_2$ ) of compound **2u**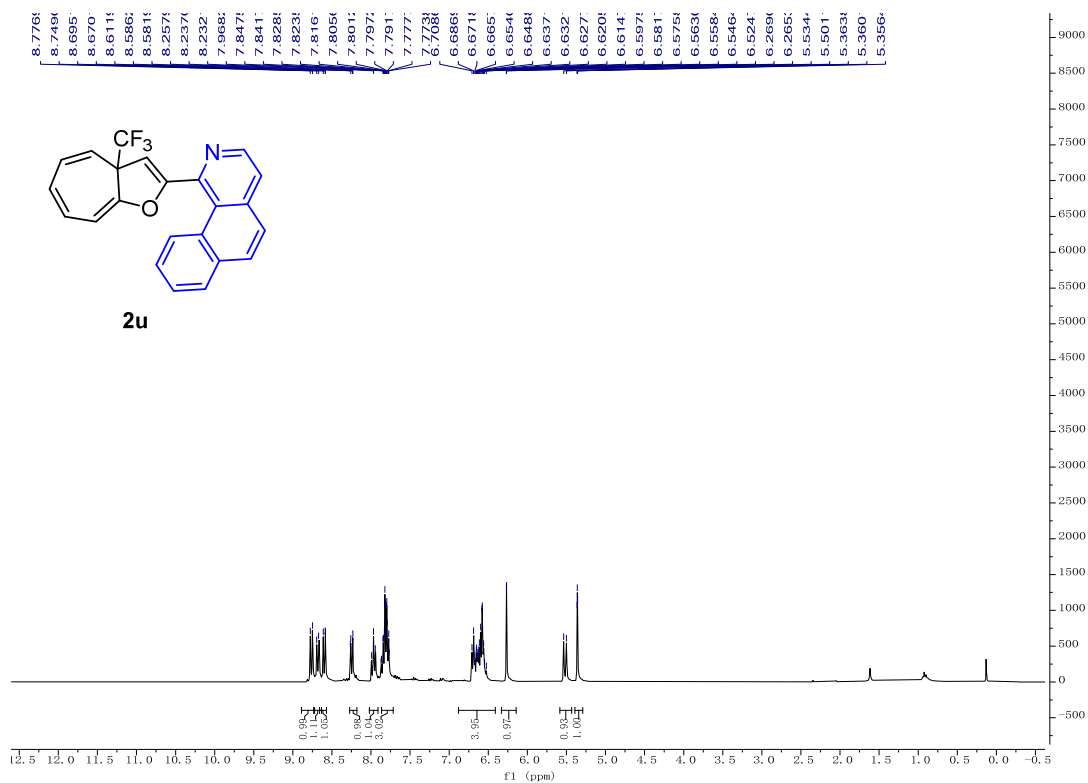 $^{13}\text{C}$  NMR (75 MHz,  $\text{CD}_2\text{Cl}_2$ ) of compound **2u**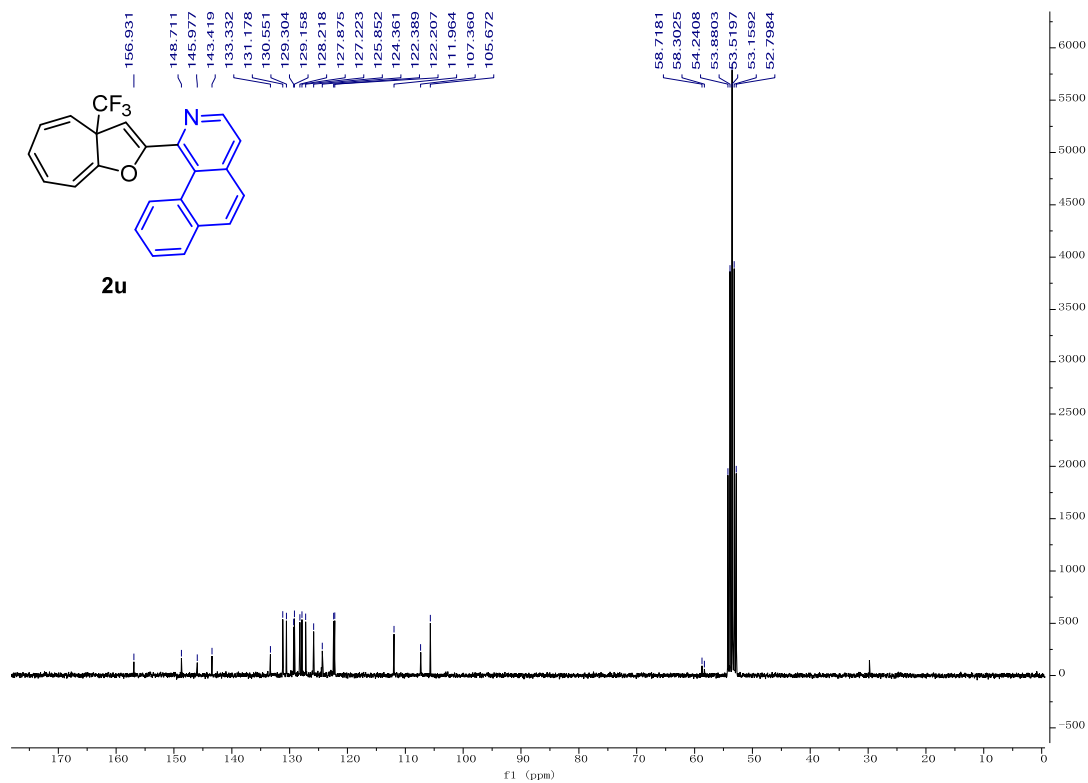

$^{19}\text{F}$  NMR (565 MHz,  $\text{CD}_2\text{Cl}_2$ ) of compound **2u**

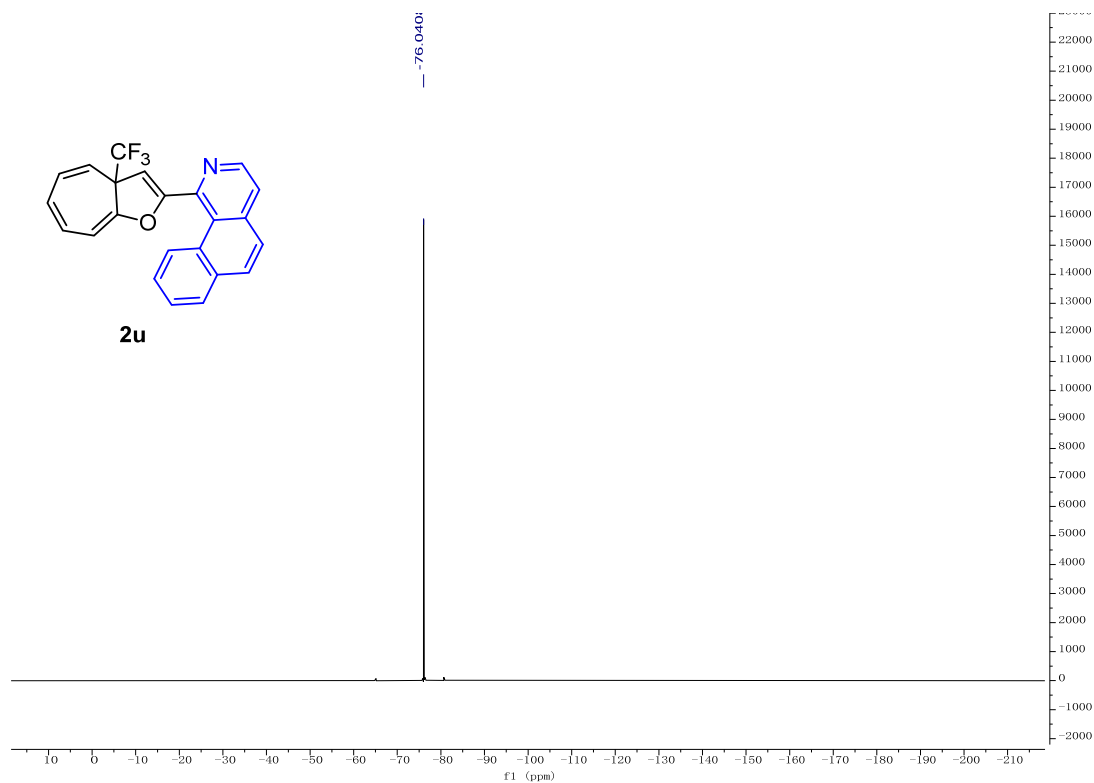

$^1\text{H}$  NMR (600 MHz,  $\text{CDCl}_3$ ) of compound **2v**

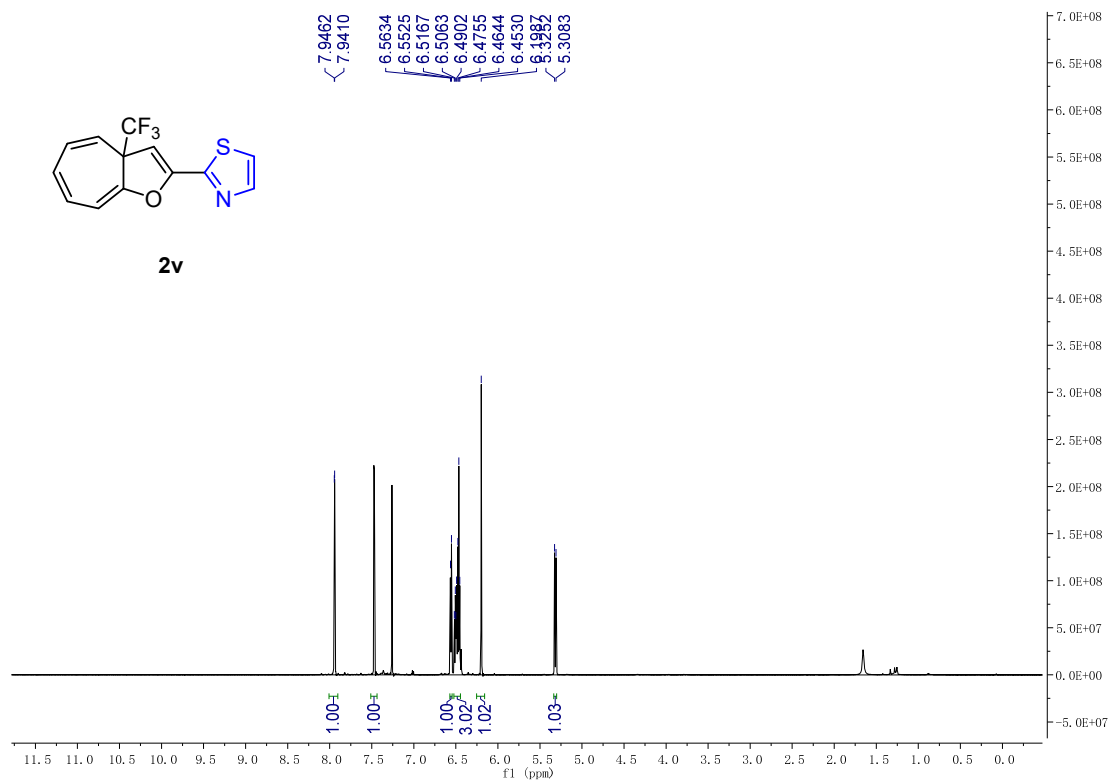

$^{13}\text{C}$  NMR (151 MHz,  $\text{CDCl}_3$ ) of compound **2v**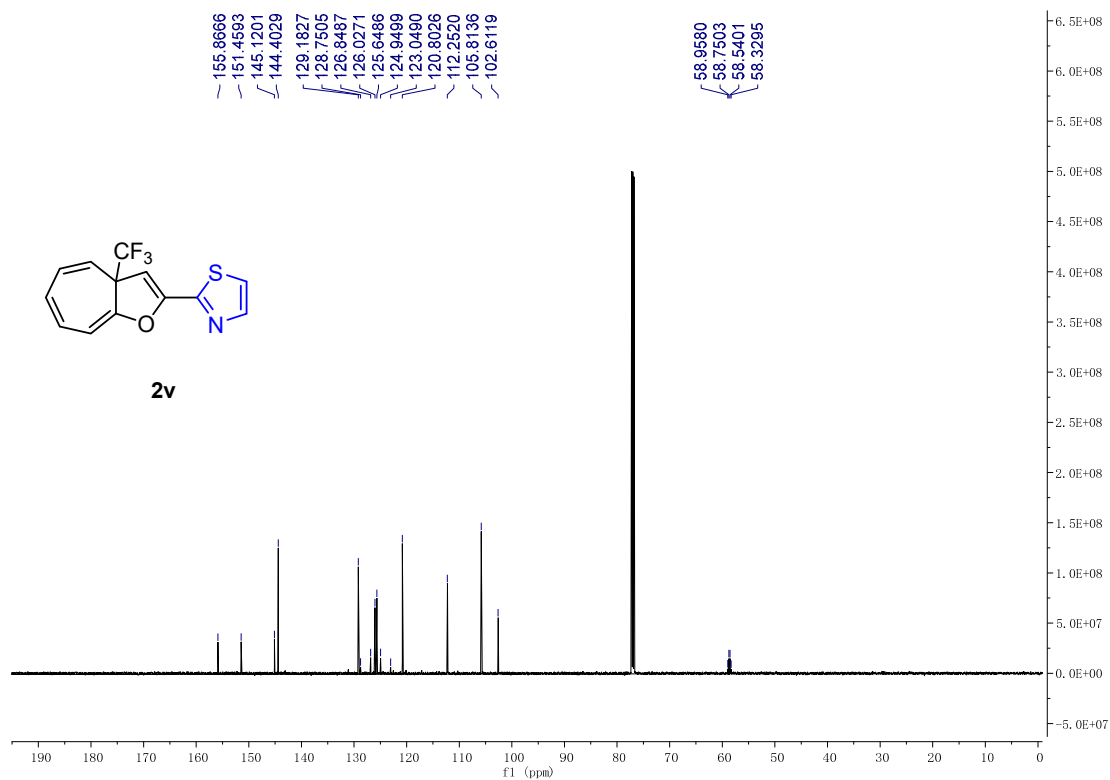 $^{19}\text{F}$  NMR (565 MHz,  $\text{CDCl}_3$ ) of compound **2v**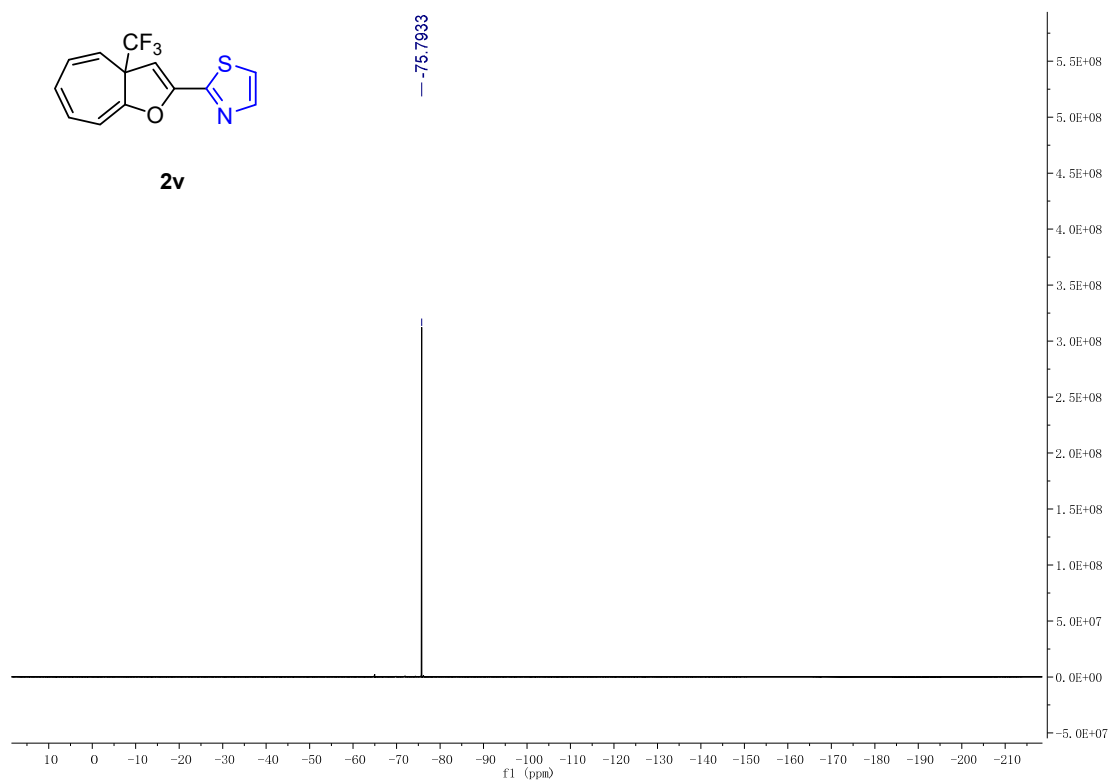

$^1\text{H}$  NMR (300 MHz,  $\text{CDCl}_3$ ) of compound **2w**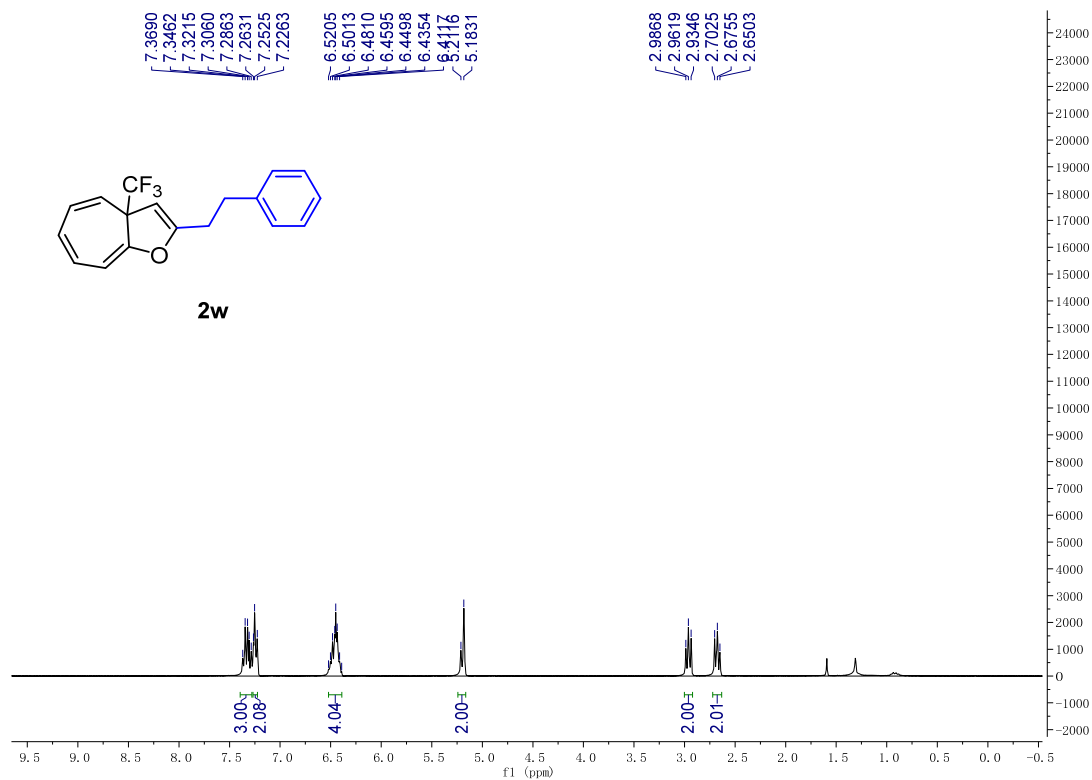 $^{13}\text{C}$  NMR (75 MHz,  $\text{CDCl}_3$ ) of compound **2w**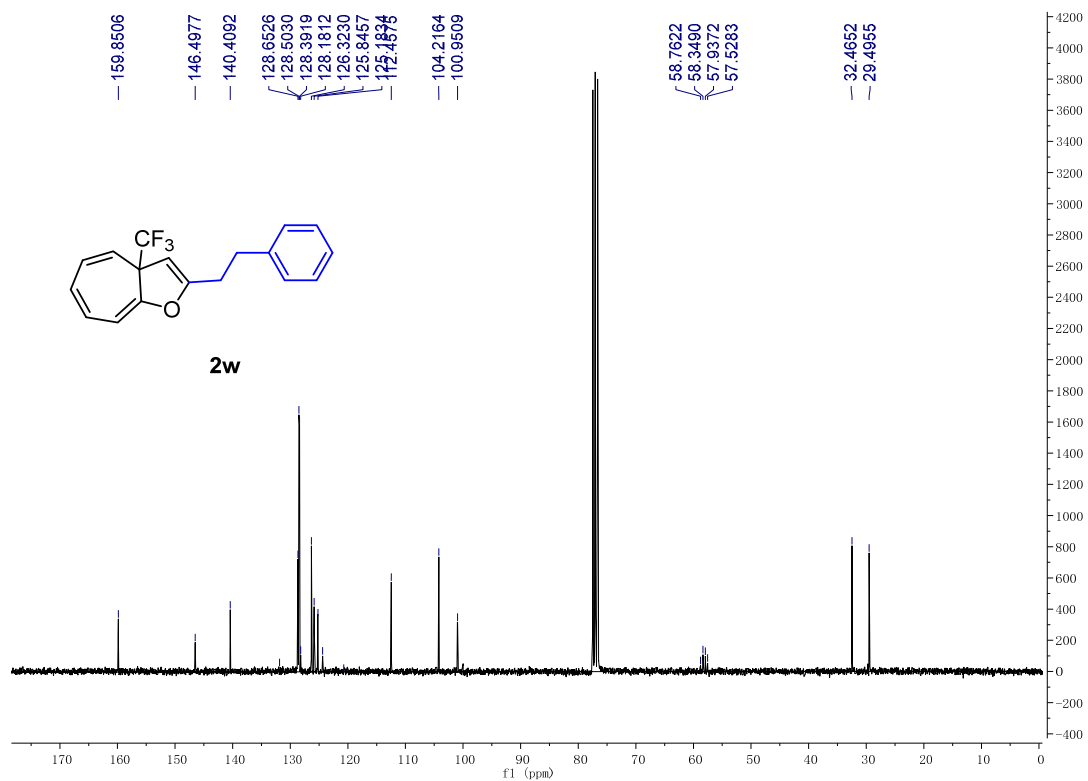

$^{19}\text{F}$  NMR (565 MHz,  $\text{CDCl}_3$ ) of compound **2w**

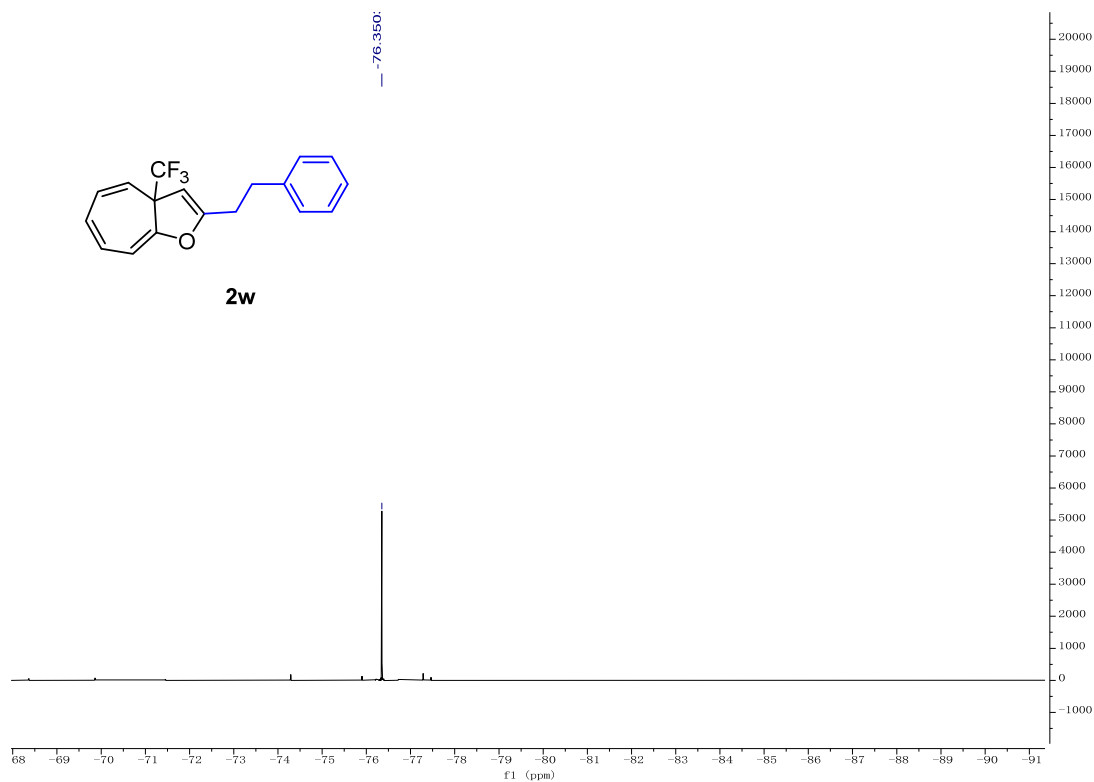

$^1\text{H}$  NMR (600 MHz,  $\text{CDCl}_3$ ) of compound **2x**

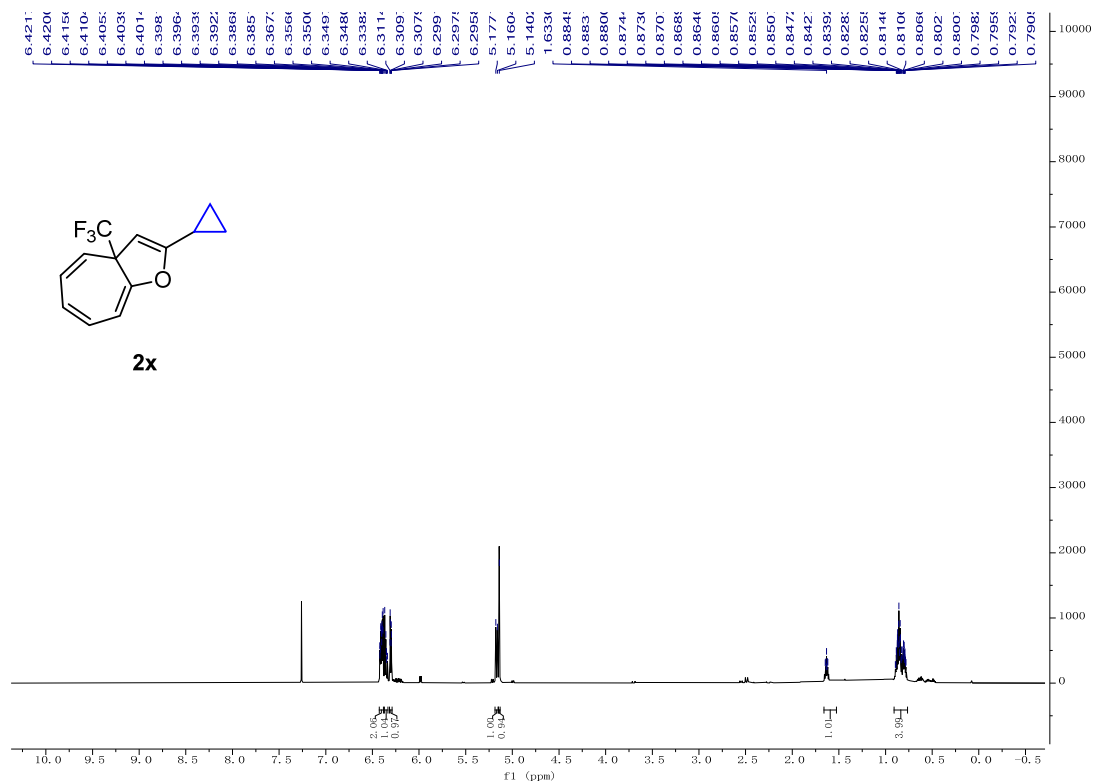

$^{13}\text{C}$  NMR (151 MHz,  $\text{CDCl}_3$ ) of compound **2x**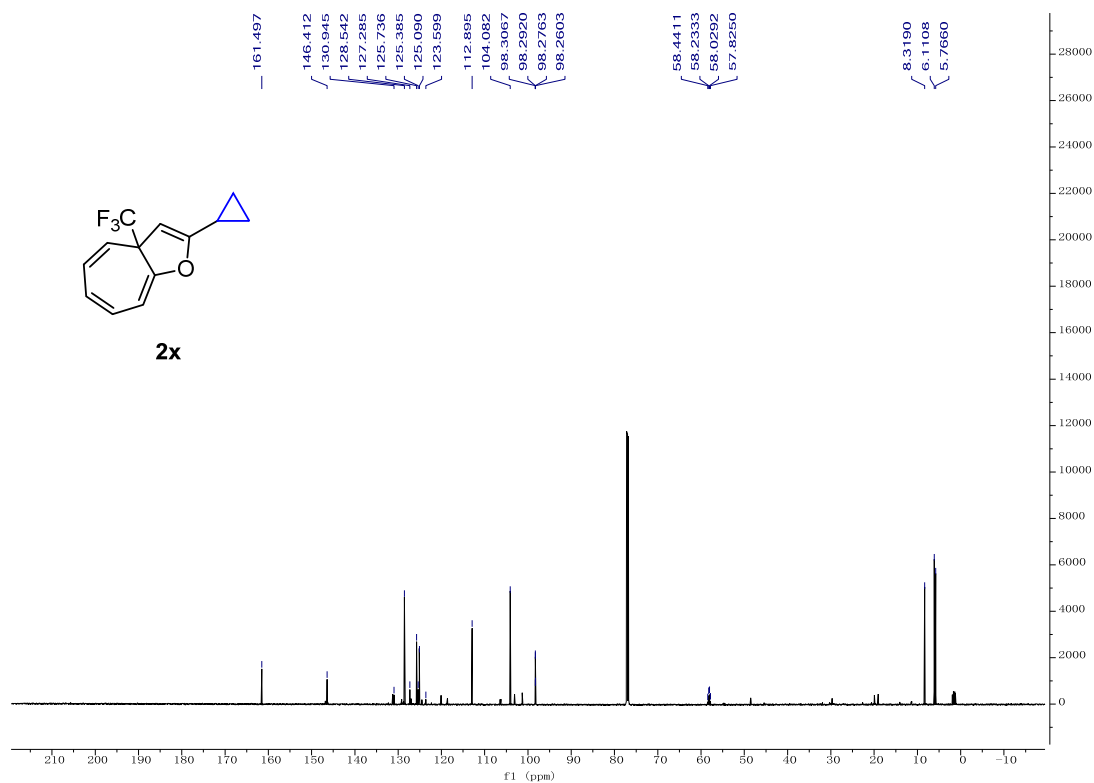 $^{19}\text{F}$  NMR (565 MHz,  $\text{CDCl}_3$ ) of compound **2x**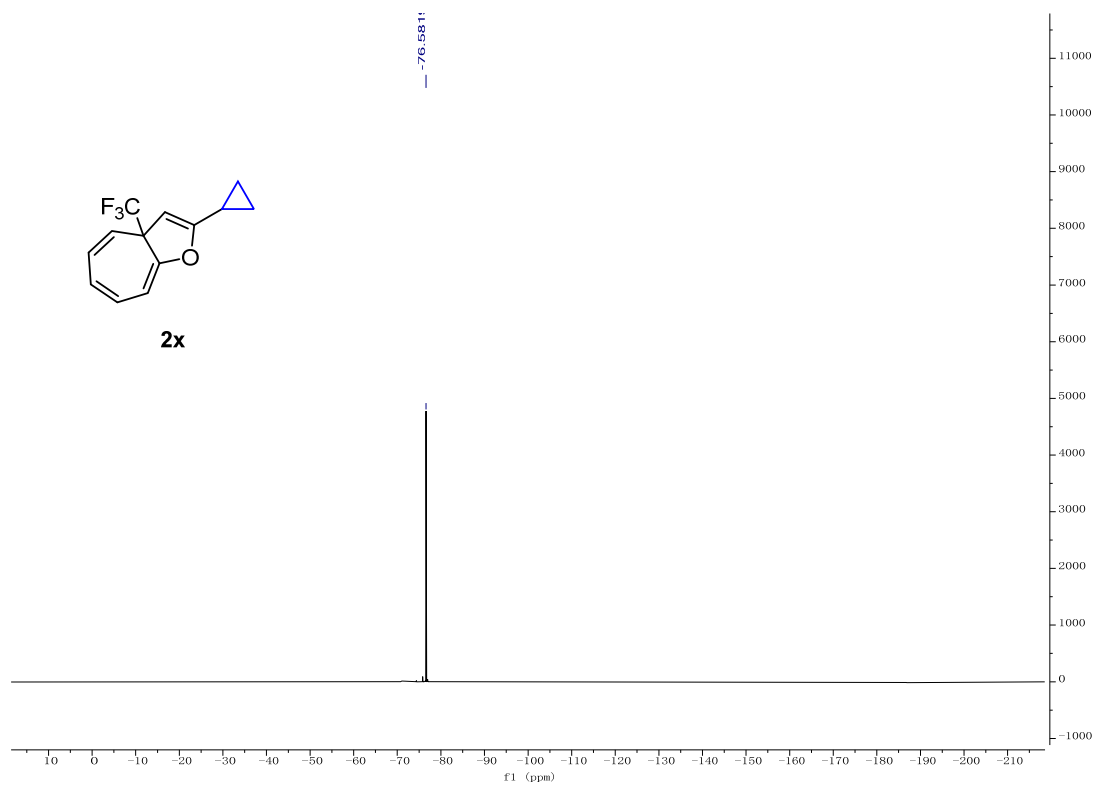

$^1\text{H}$  NMR (300 MHz,  $\text{CDCl}_3$ ) of compound **2y**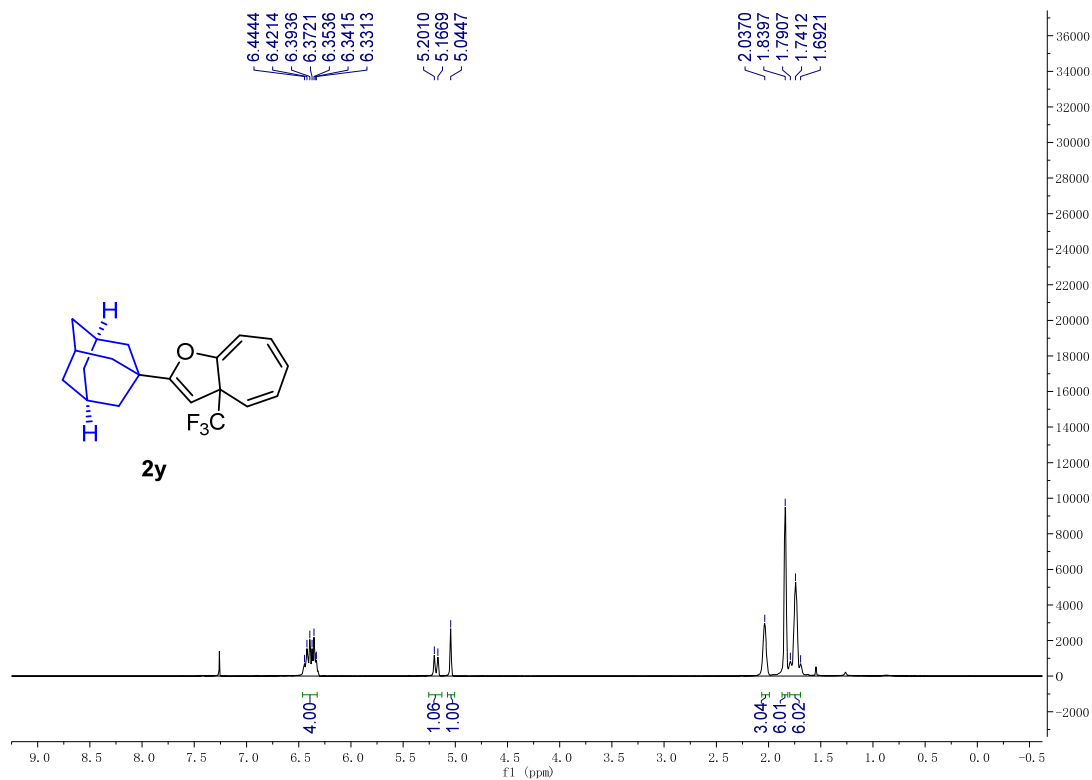 $^{13}\text{C}$  NMR (75 MHz,  $\text{CDCl}_3$ ) of compound **2y**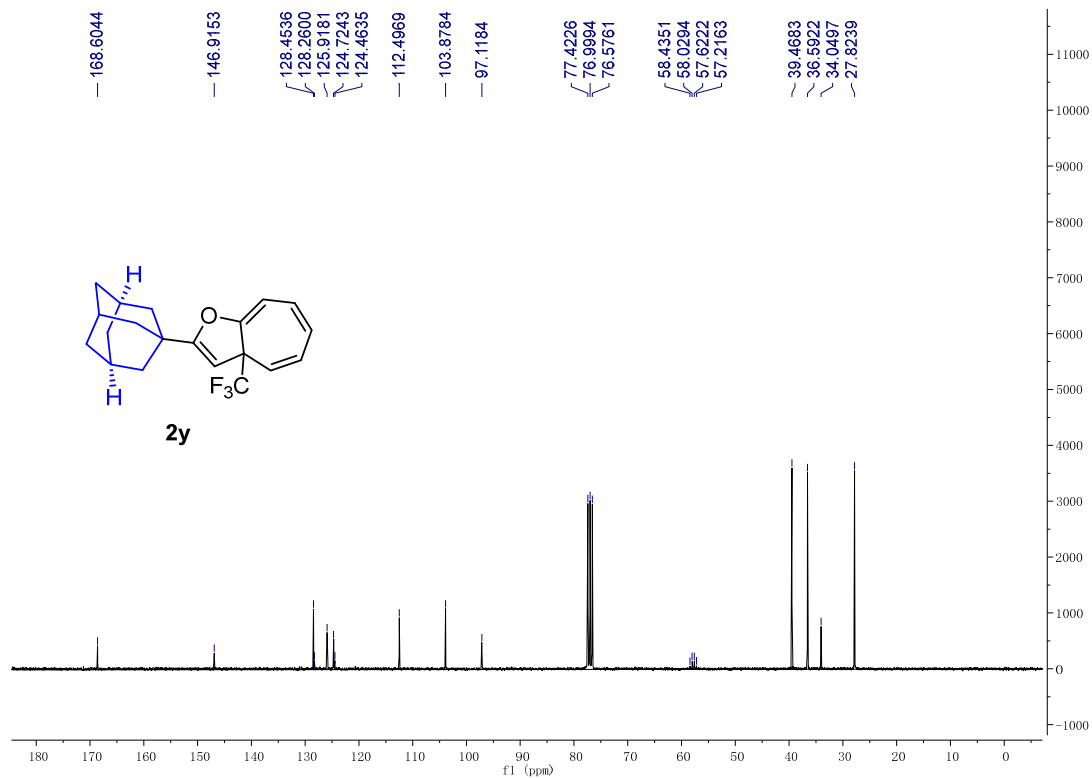



$^{19}\text{F}$  NMR (565 MHz,  $\text{CDCl}_3$ )  $\delta$  -76.7 of compound **2y**

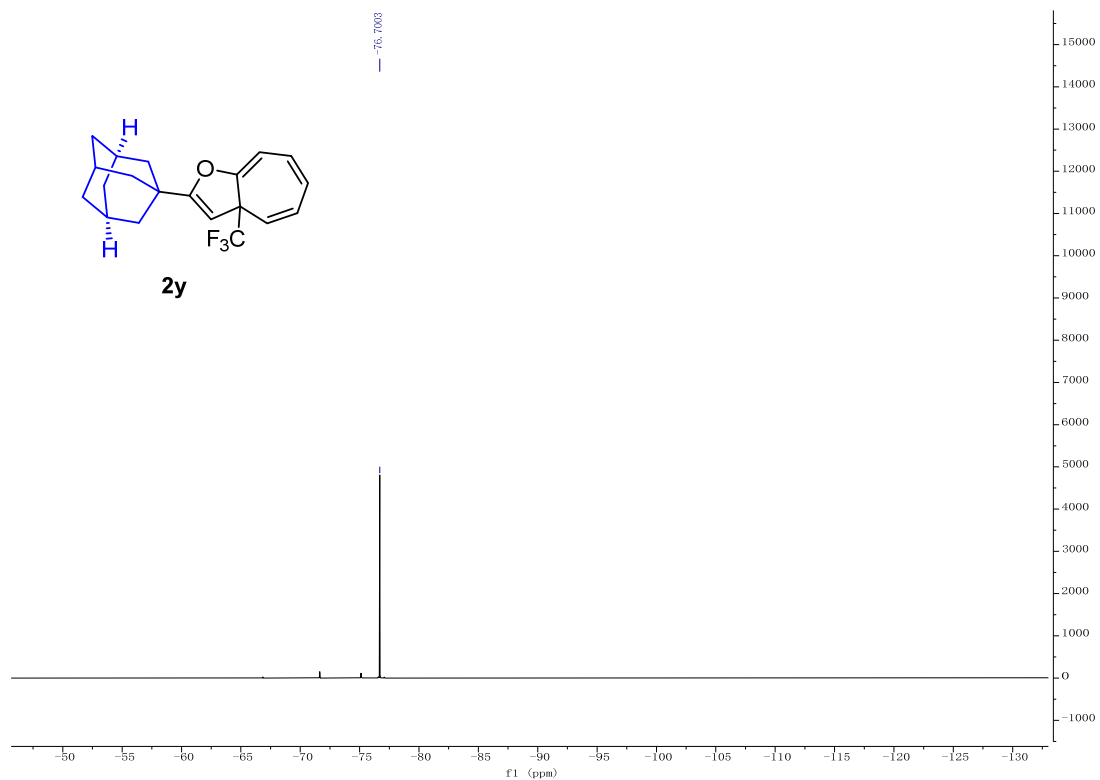

$^1\text{H}$  NMR (400 MHz,  $\text{CDCl}_3$ ) of compound **2za**

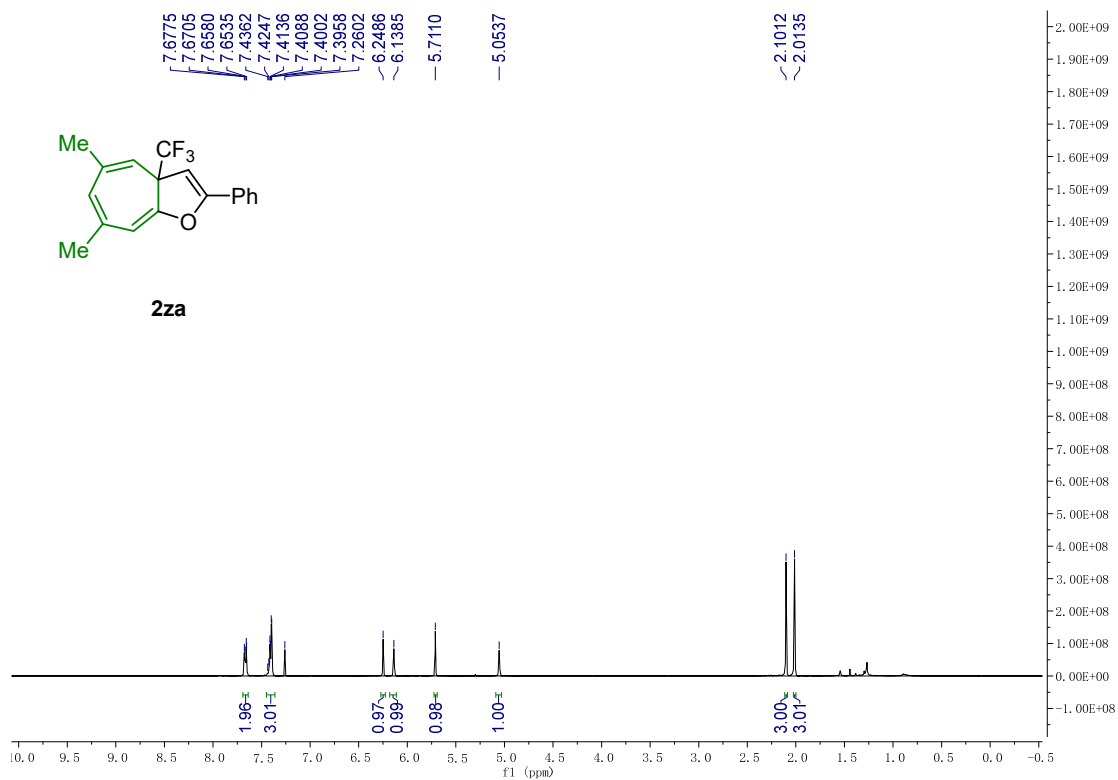

$^{13}\text{C}$  NMR (101 MHz,  $\text{CDCl}_3$ ) of compound **2za**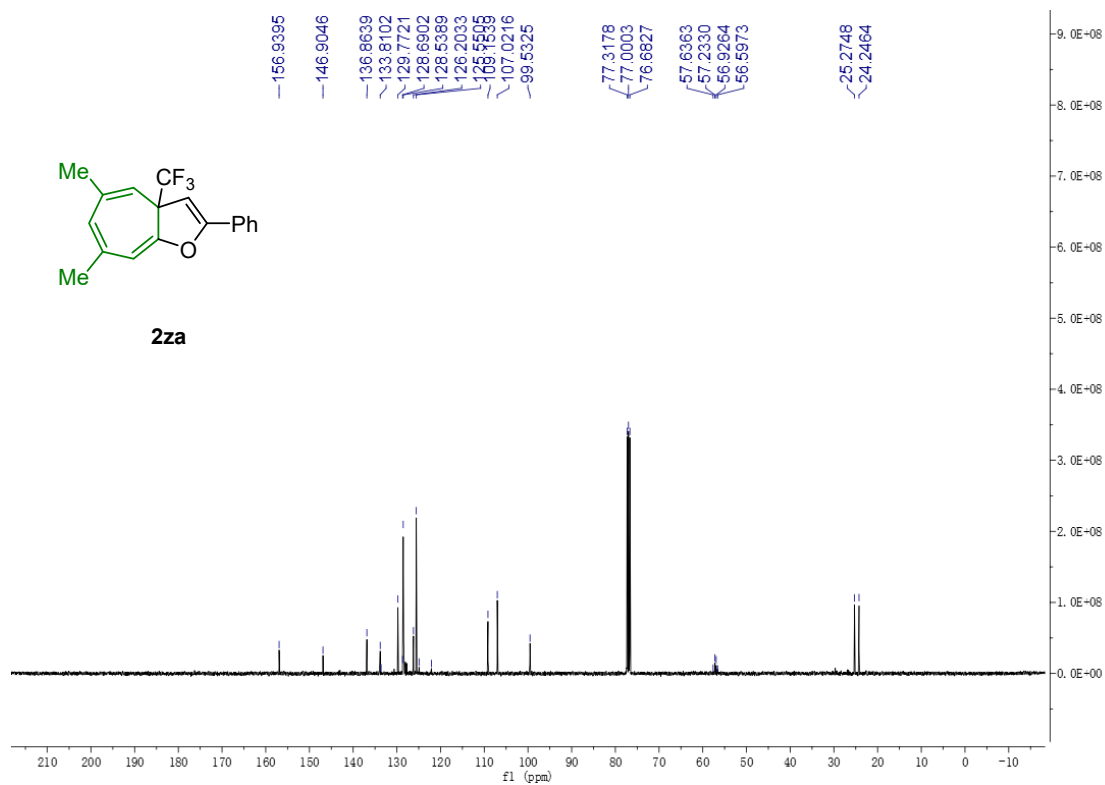 $^{19}\text{F}$  NMR (376 MHz,  $\text{CDCl}_3$ ) of compound **2za**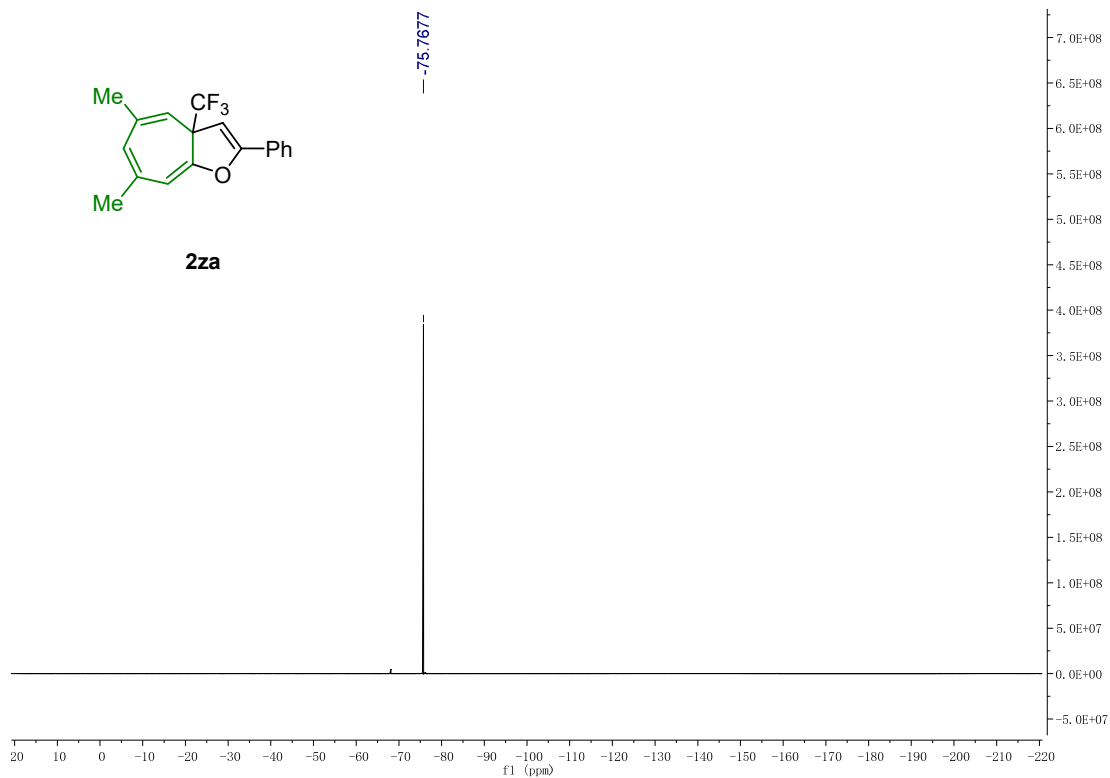

$^1\text{H}$  NMR (600 MHz,  $\text{CDCl}_3$ ) of compound **2zb**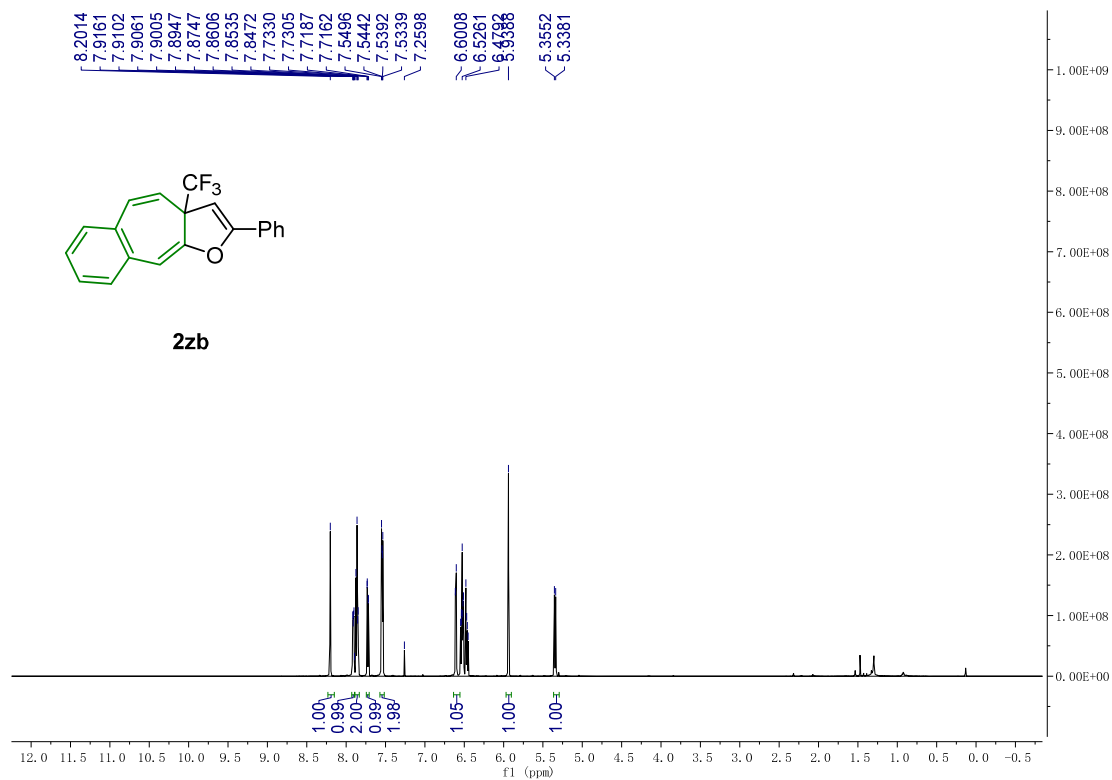 $^{13}\text{C}$  NMR (151 MHz,  $\text{CDCl}_3$ ) of compound **2zb**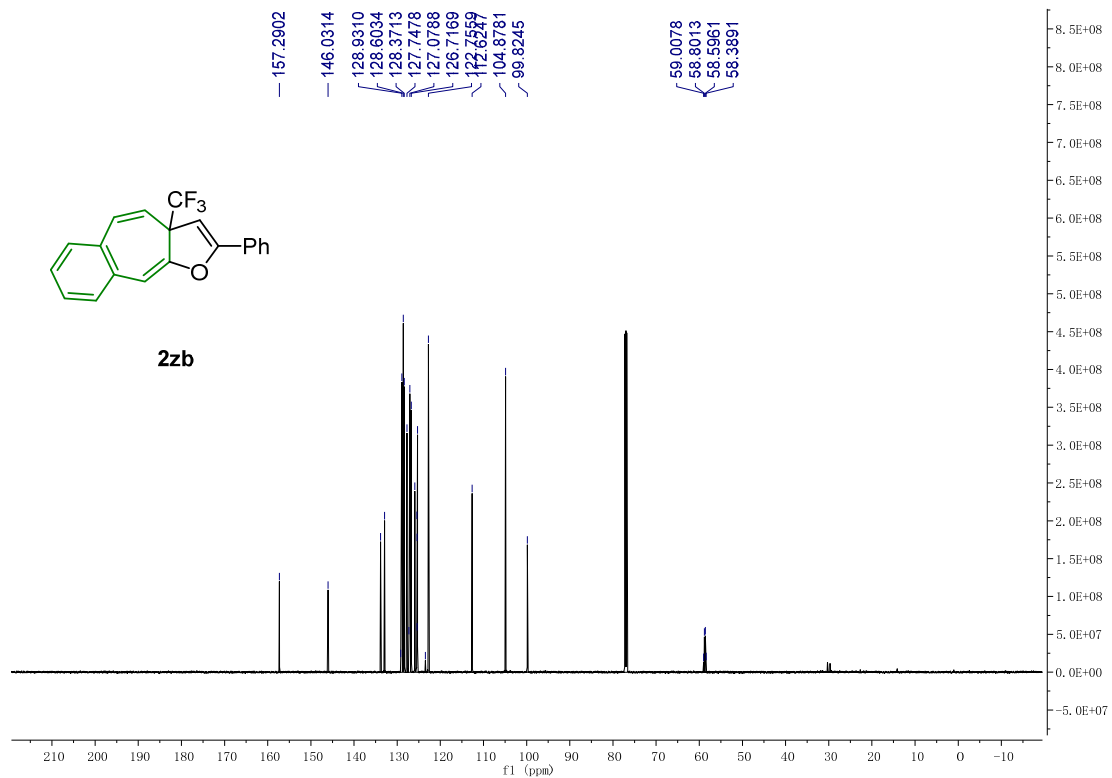



$^{13}\text{C}$  NMR (151 MHz,  $\text{CDCl}_3$ ) of compound **2zc**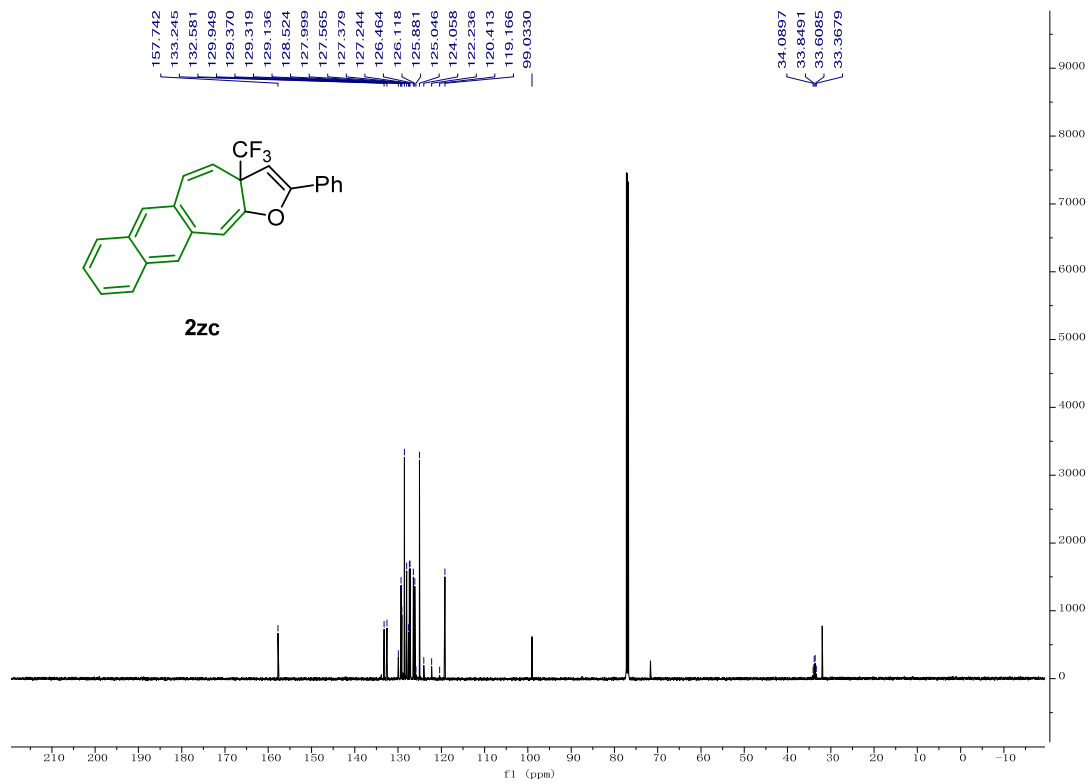 $^{19}\text{F}$  NMR (565 MHz,  $\text{CDCl}_3$ ) of compound **2zc**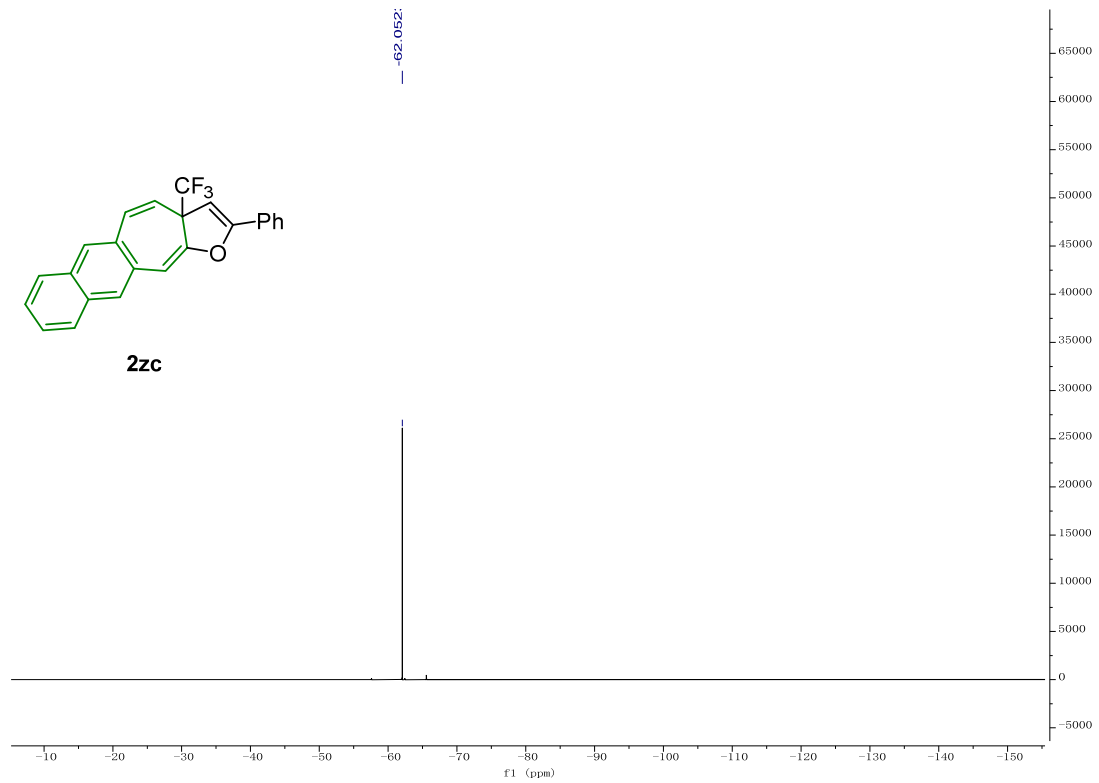

$^1\text{H}$  NMR (600 MHz,  $\text{CDCl}_3$ ) of compound **2zd-1**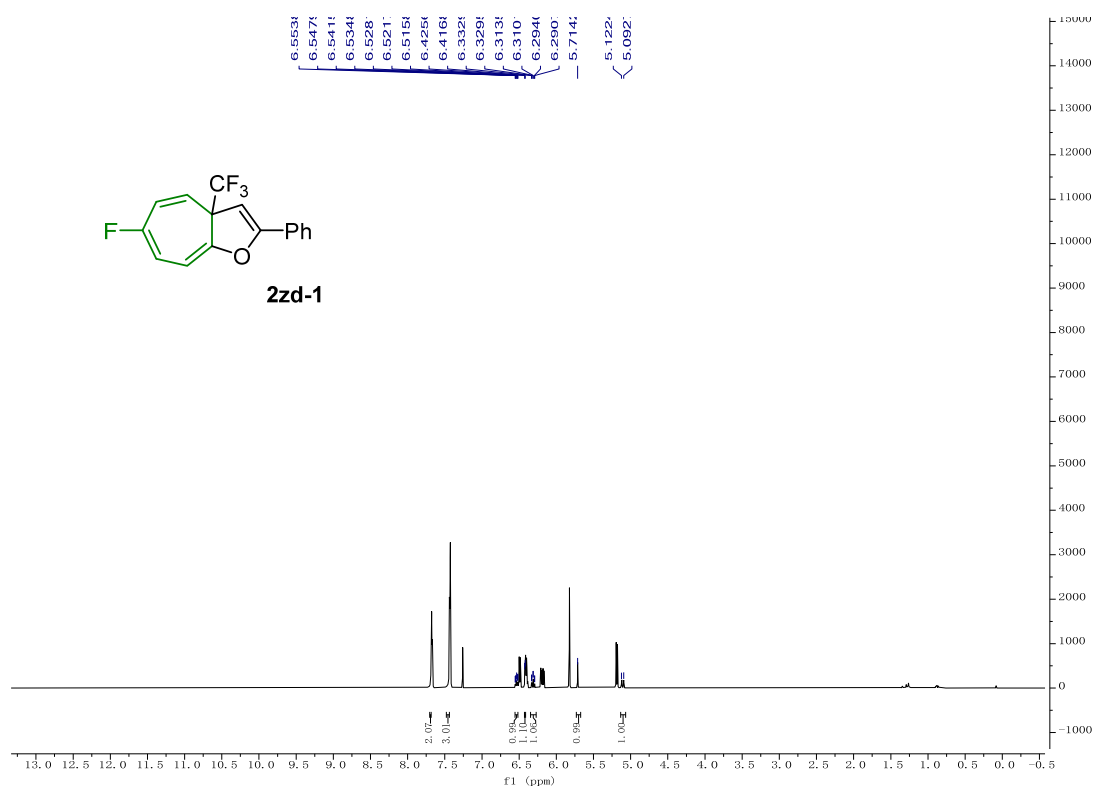 $^1\text{H}$  NMR (600 MHz,  $\text{CDCl}_3$ ) of compound **2zd-2**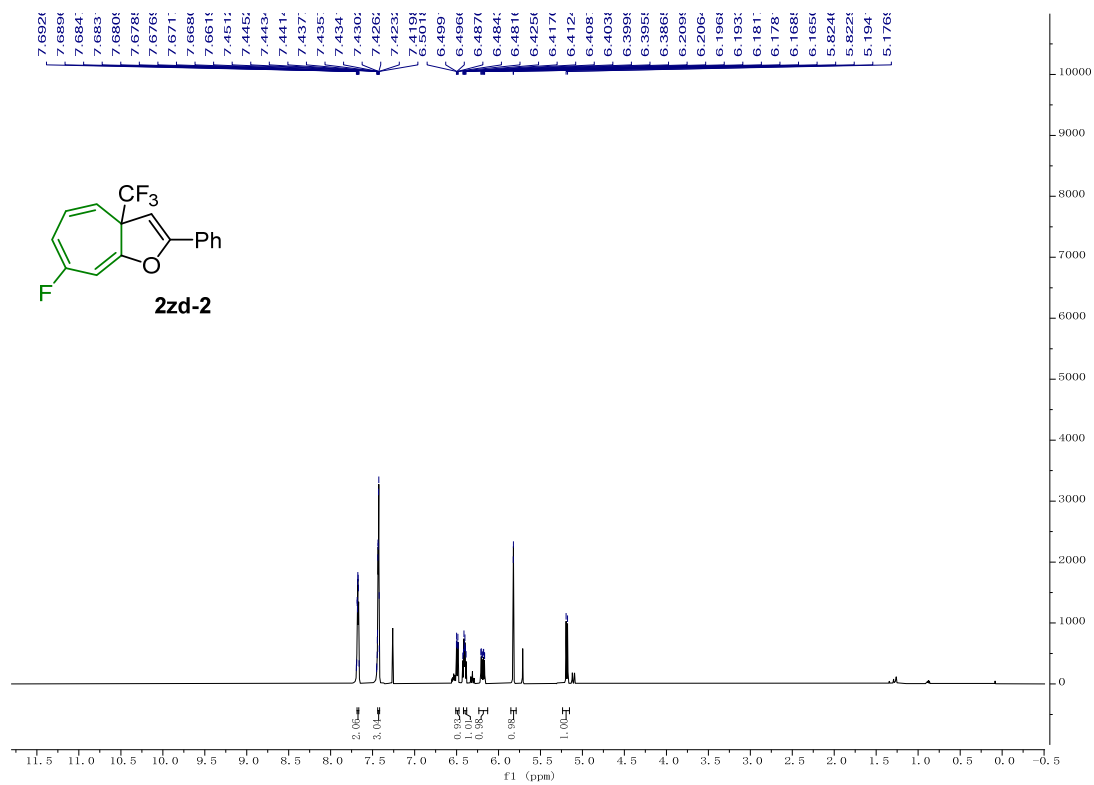

$^{13}\text{C}$  NMR (151 MHz,  $\text{CDCl}_3$ ) of compound **2zd-1** and **2zd-2**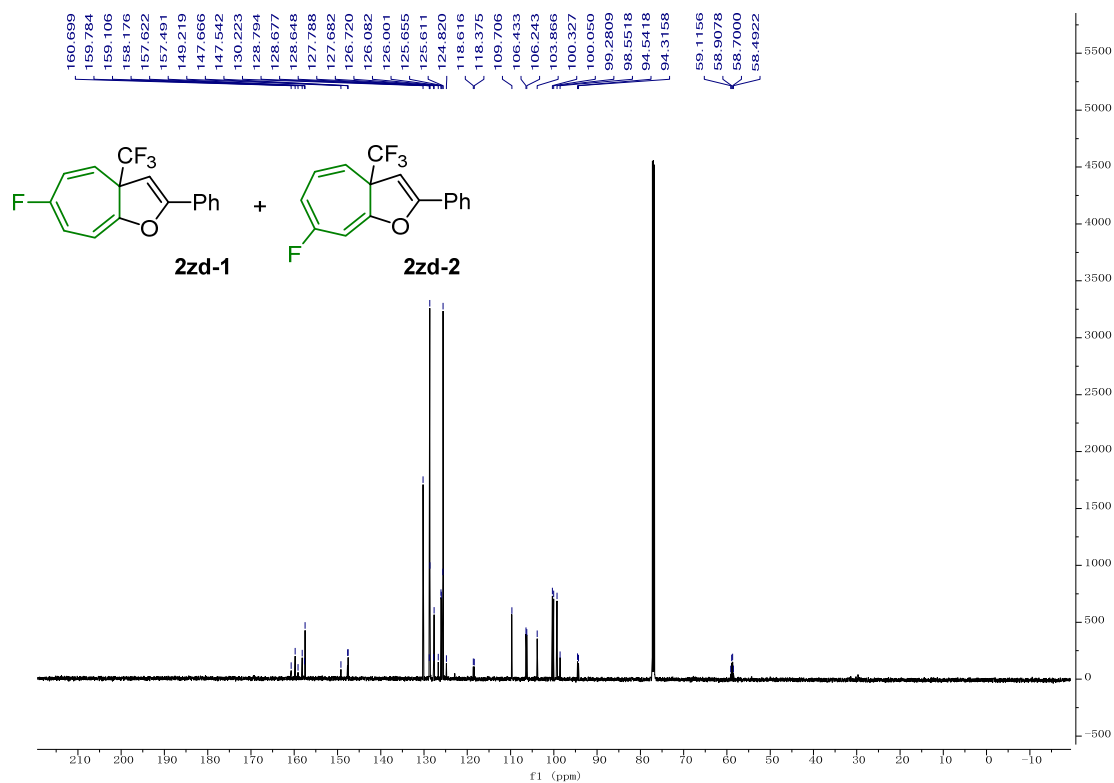 $^{19}\text{F}$  NMR (565 MHz,  $\text{CDCl}_3$ ) of compound **2zd-1** and **2zd-2**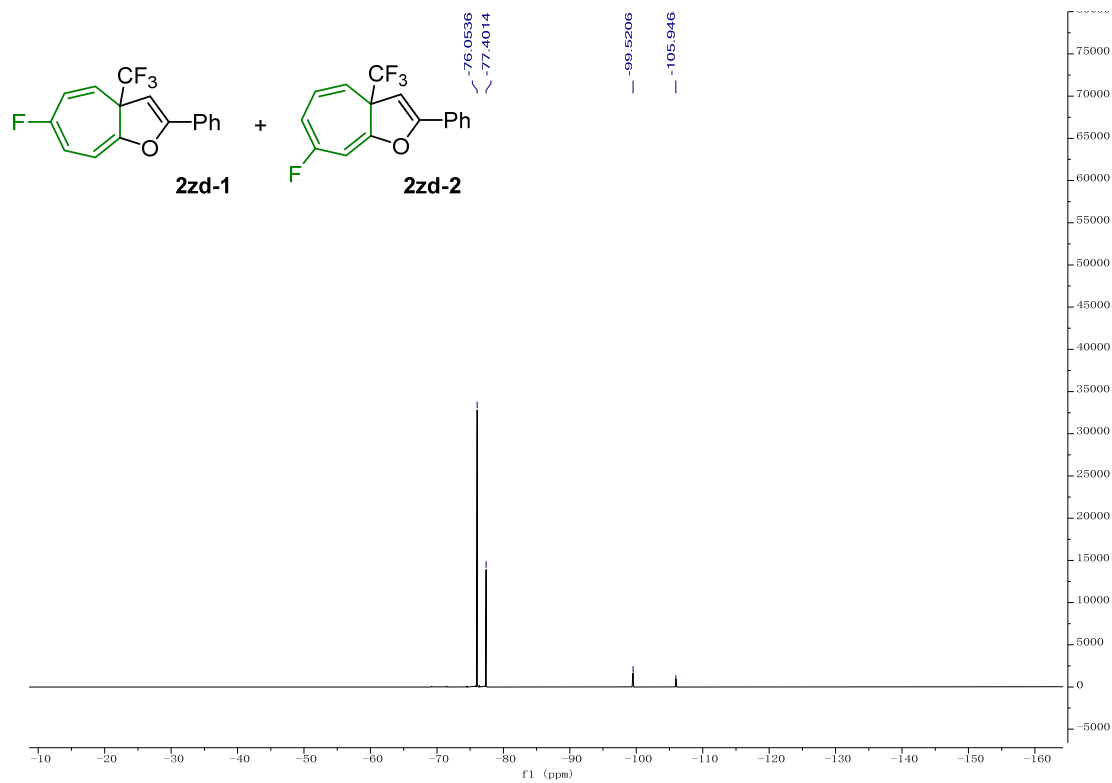

$^1\text{H}$  NMR (600 MHz,  $\text{CDCl}_3$ ) of compound **2ze**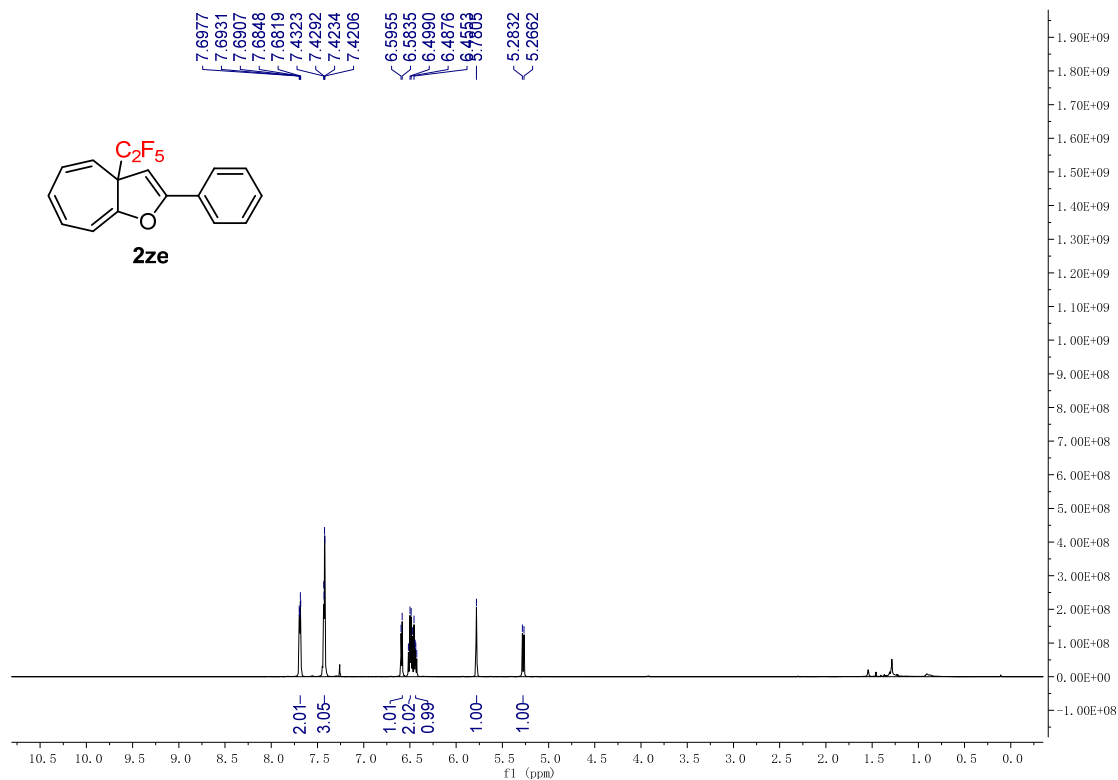 $^{13}\text{C}$  NMR (151 MHz,  $\text{CDCl}_3$ ) of compound **2ze**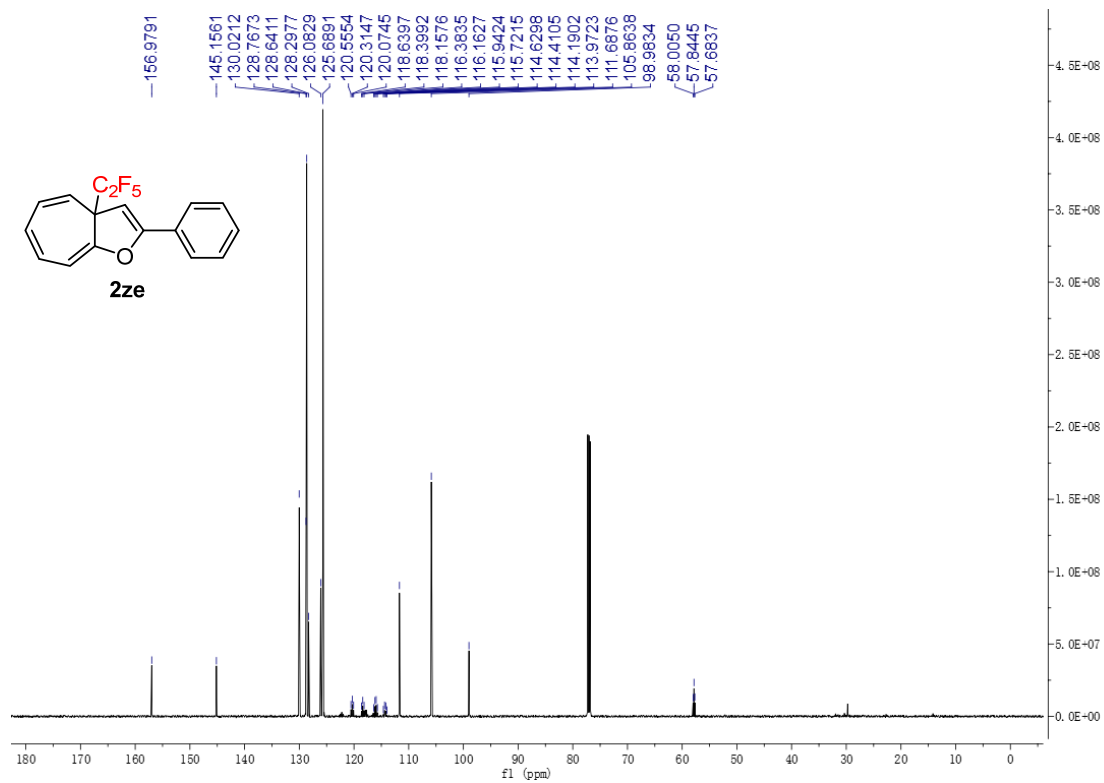



$^{19}\text{F}$  NMR (565 MHz,  $\text{CDCl}_3$ ) of compound **2ze**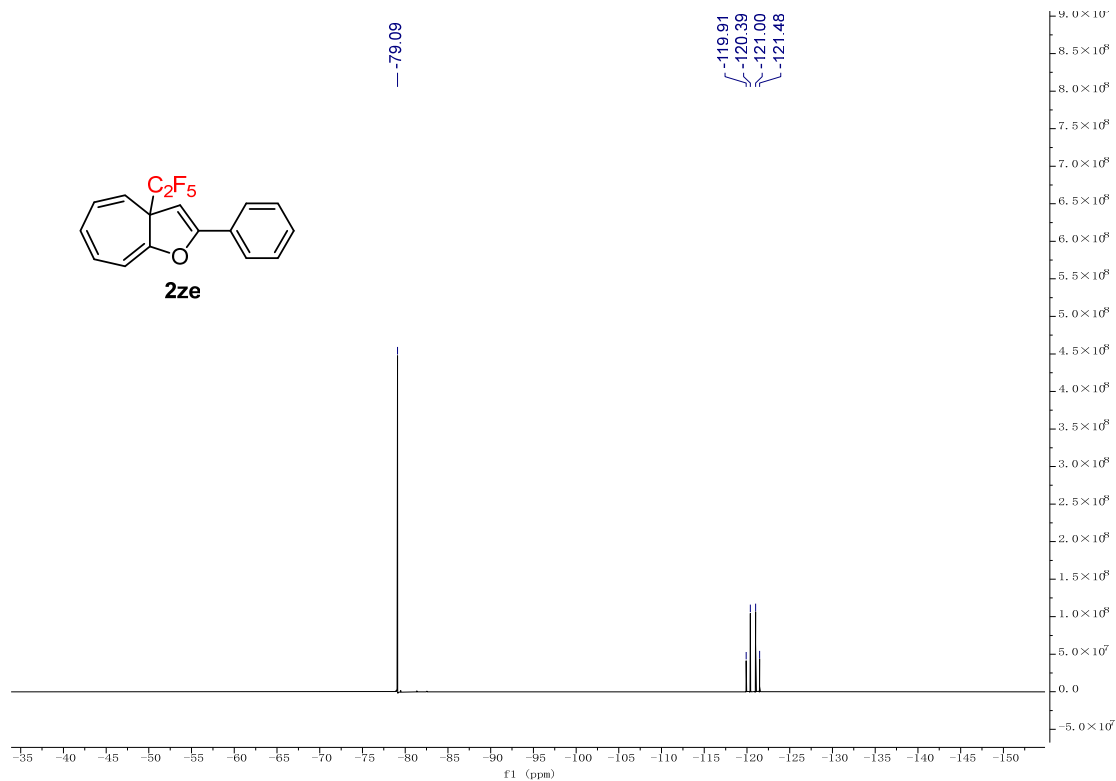 $^1\text{H}$  NMR (400 MHz,  $\text{CDCl}_3$ ) of compound **2zf**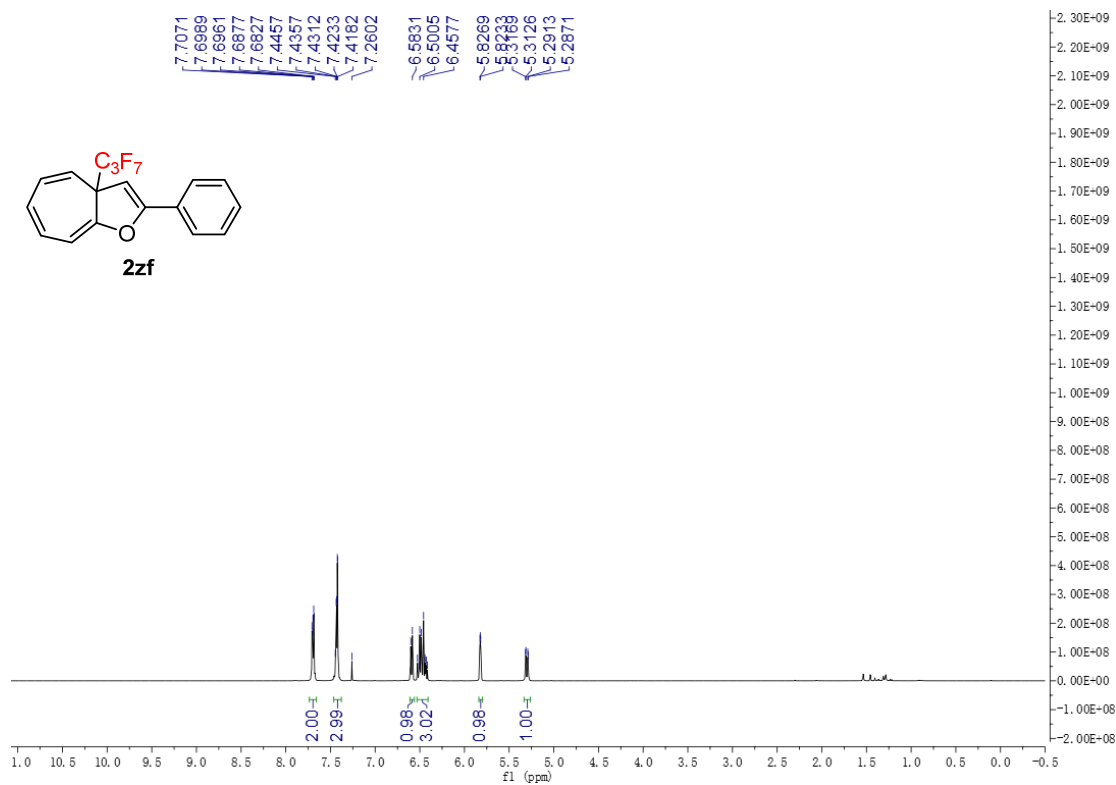

$^{13}\text{C}$  NMR (101 MHz,  $\text{CDCl}_3$ ) of compound **2zf**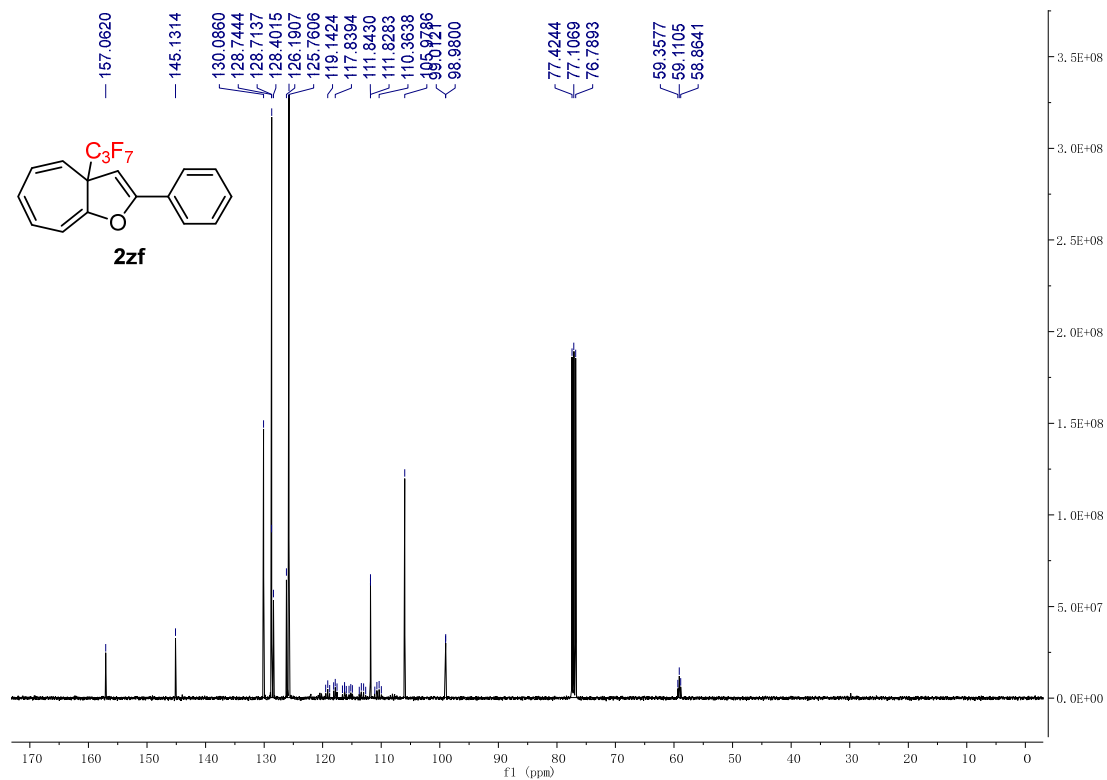 $^{19}\text{F}$  NMR (376 MHz,  $\text{CDCl}_3$ ) of compound **2zf**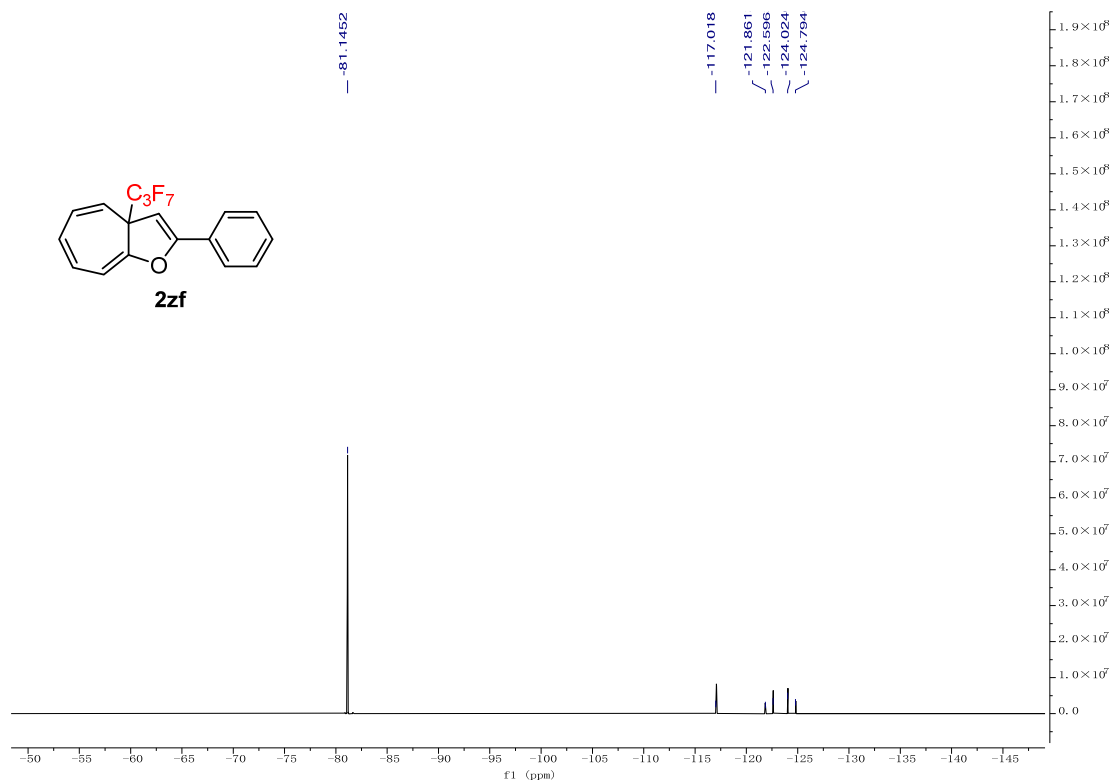

$^1\text{H}$  NMR (600 MHz,  $\text{CDCl}_3$ ) of compound **2zg**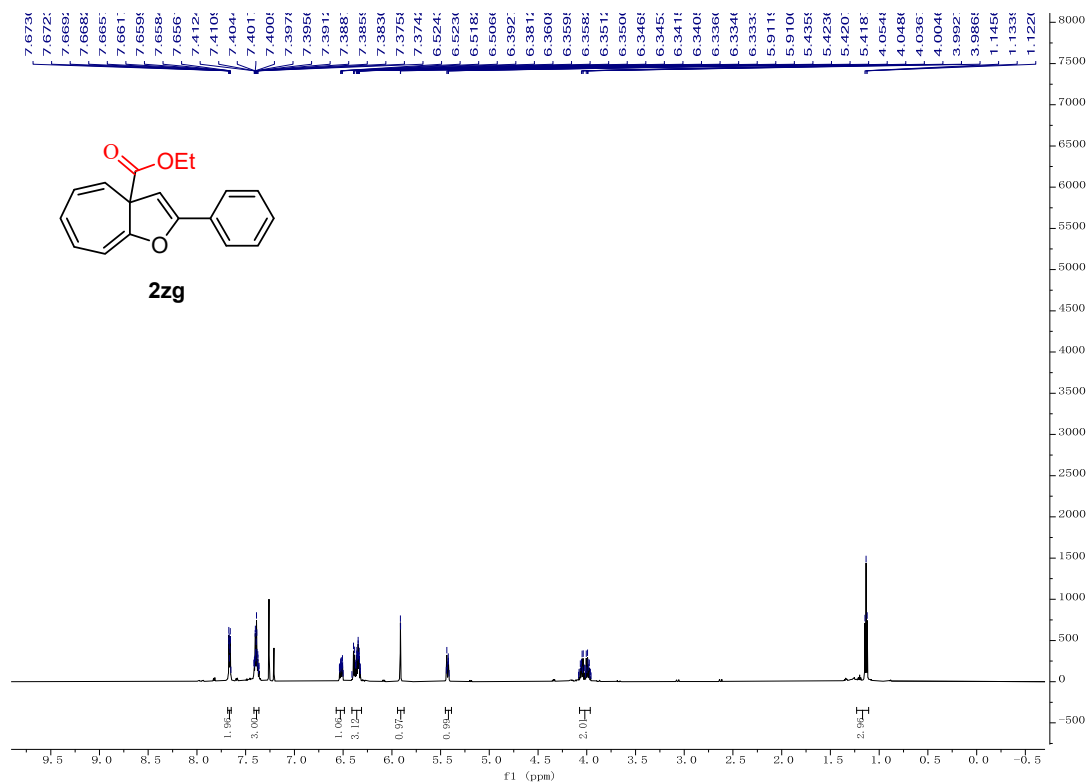 $^{13}\text{C}$  NMR (151 MHz,  $\text{CDCl}_3$ ) of compound **2zg**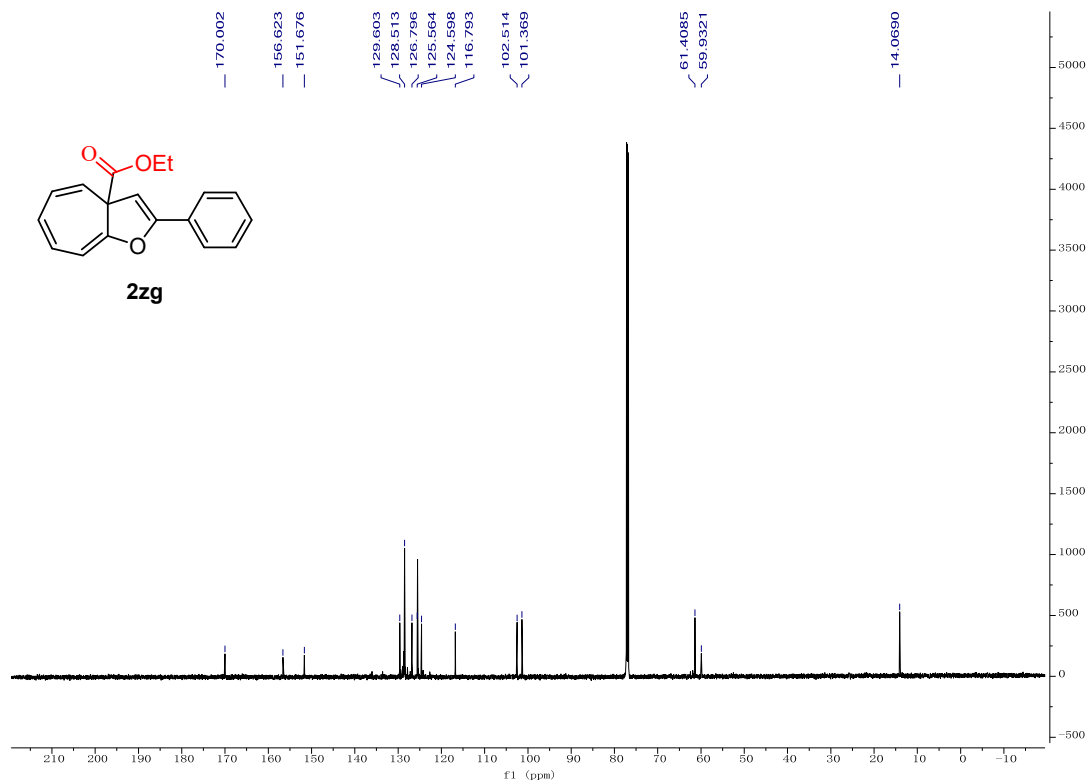

$^1\text{H}$  NMR (400 MHz,  $\text{CDCl}_3$ ) of compound **2zh**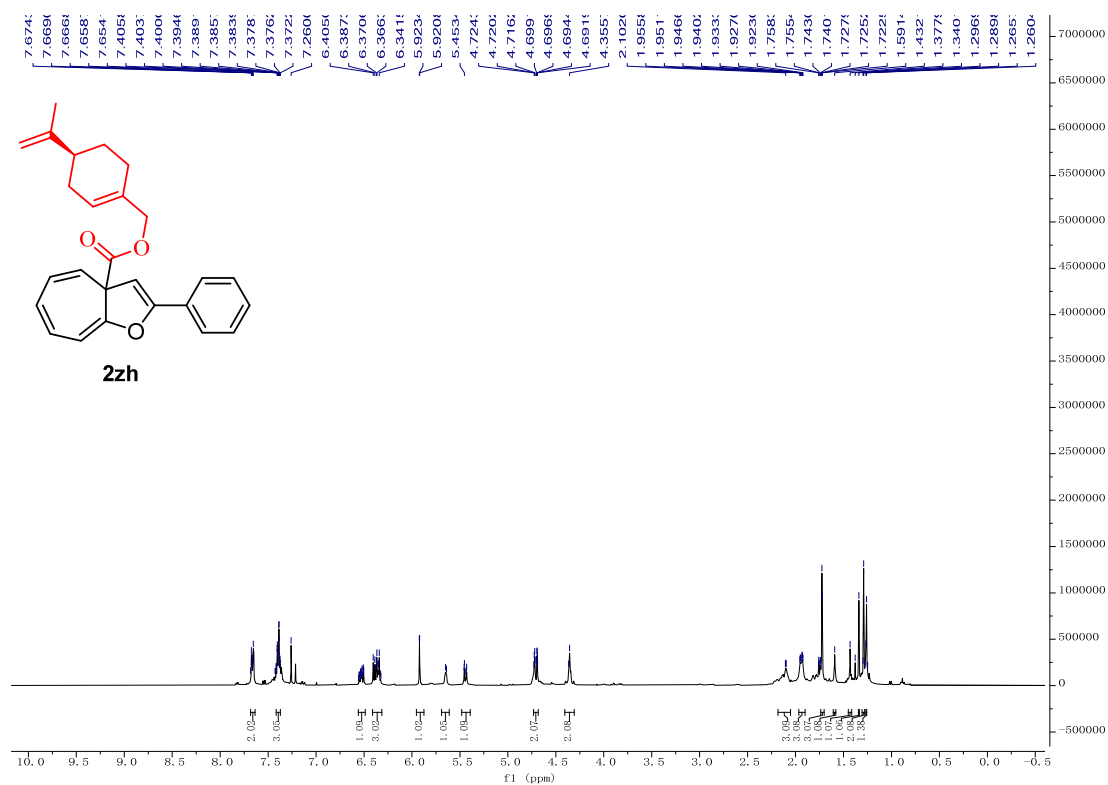 $^{13}\text{C}$  NMR (151 MHz,  $\text{CD}_2\text{Cl}_2$ ) of compound **2zh**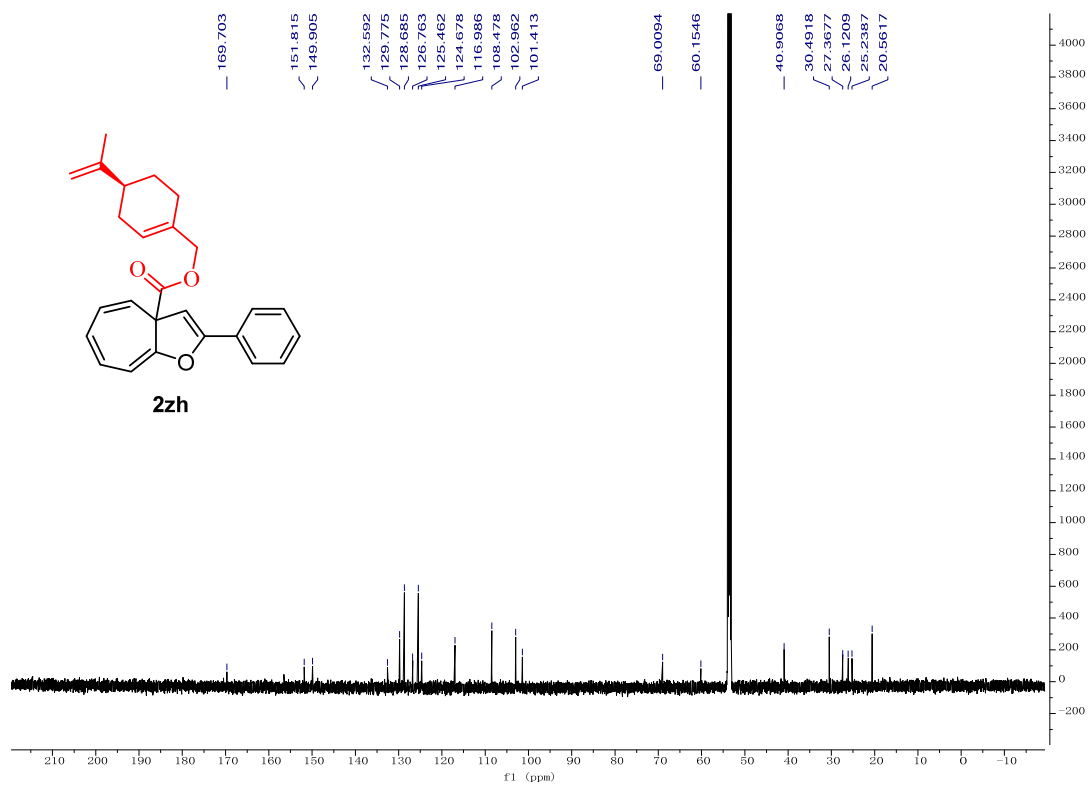

$^1\text{H}$  NMR (400 MHz,  $\text{CDCl}_3$ ) of compound **2zi**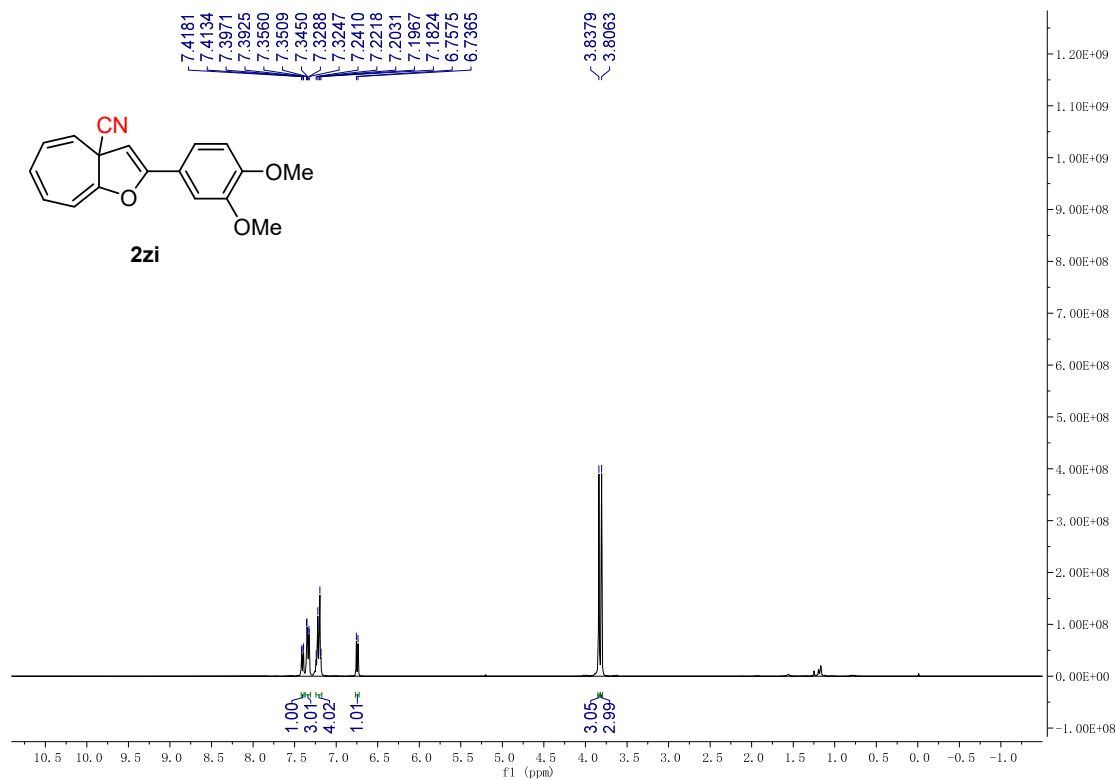 $^{13}\text{C}$  NMR (151 MHz,  $\text{CDCl}_3$ ) of compound **2zi**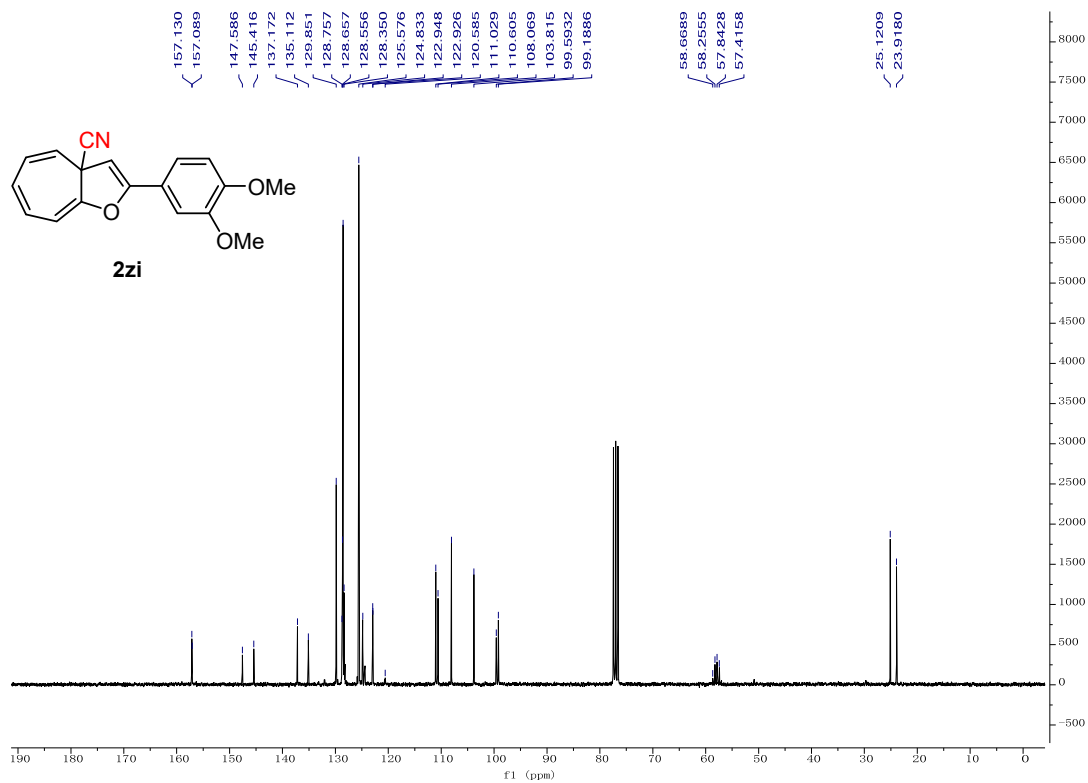

$^1\text{H}$  NMR (300 MHz,  $\text{CDCl}_3$ ) of compound **2zj**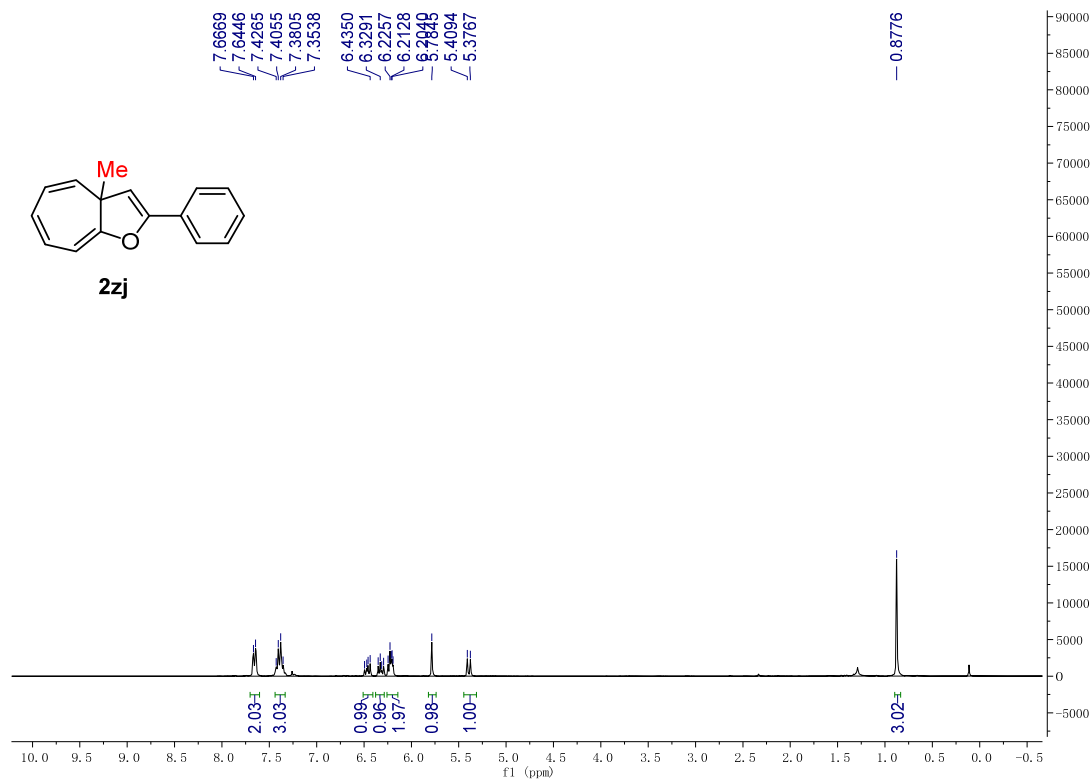 $^{13}\text{C}$  NMR (75 MHz,  $\text{CDCl}_3$ ) of compound **2zj**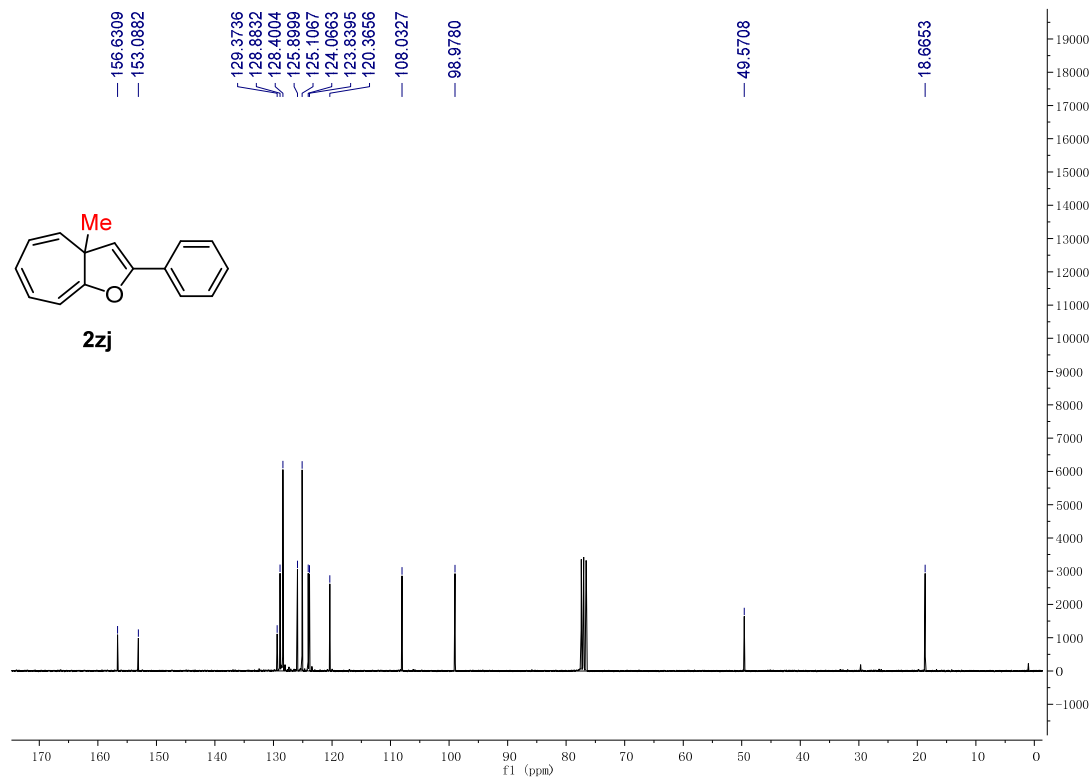

$^1\text{H}$  NMR (400 MHz,  $\text{CDCl}_3$ ) of compound **2zk**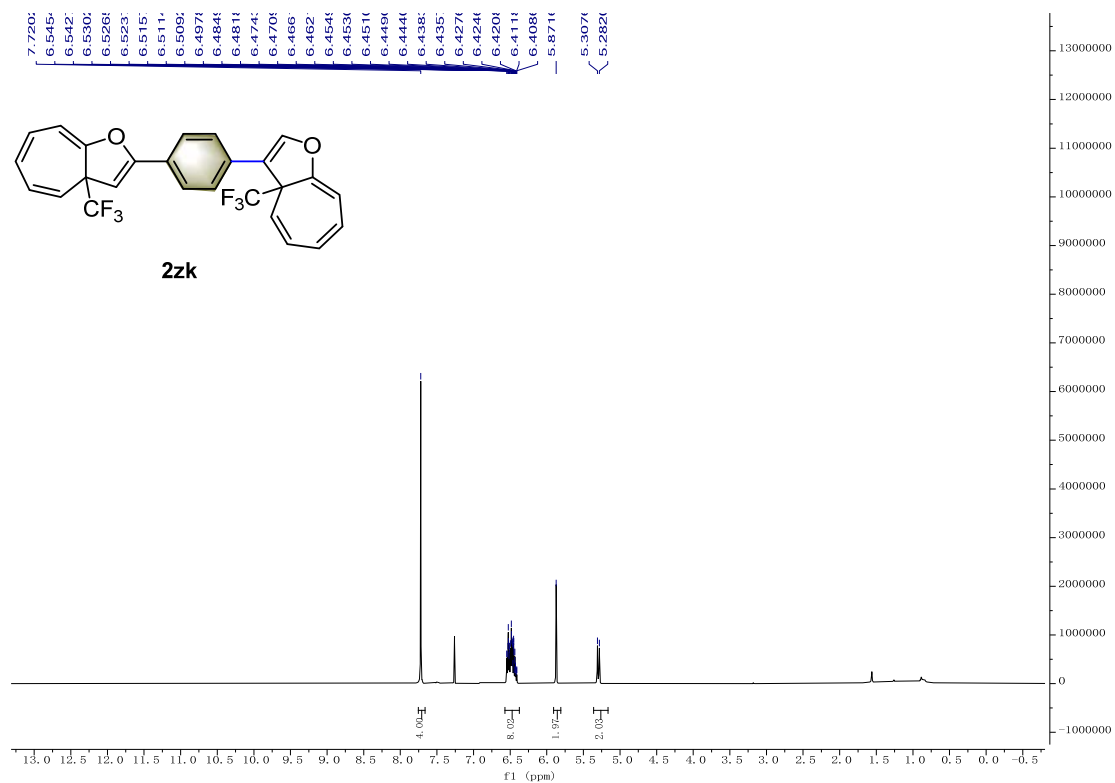 $^{13}\text{C}$  NMR (101 MHz,  $\text{CDCl}_3$ ) of compound **2zk**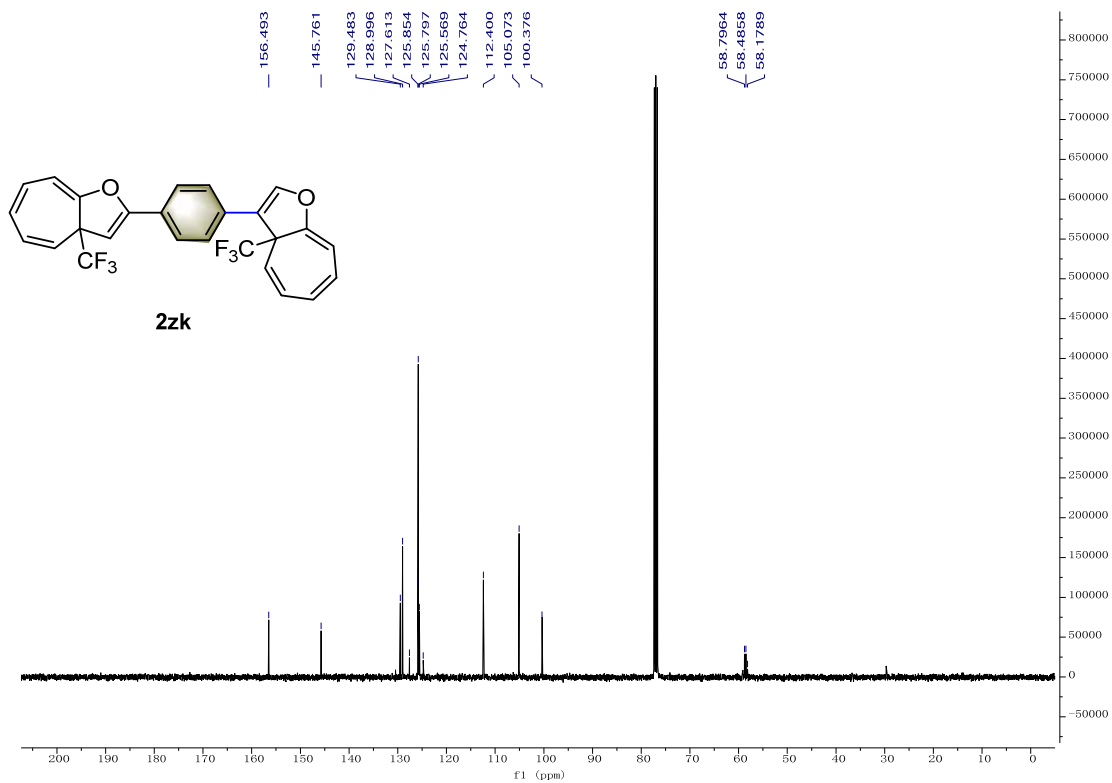

$^{19}\text{F}$  NMR (376 MHz,  $\text{CDCl}_3$ ) of compound **2zk**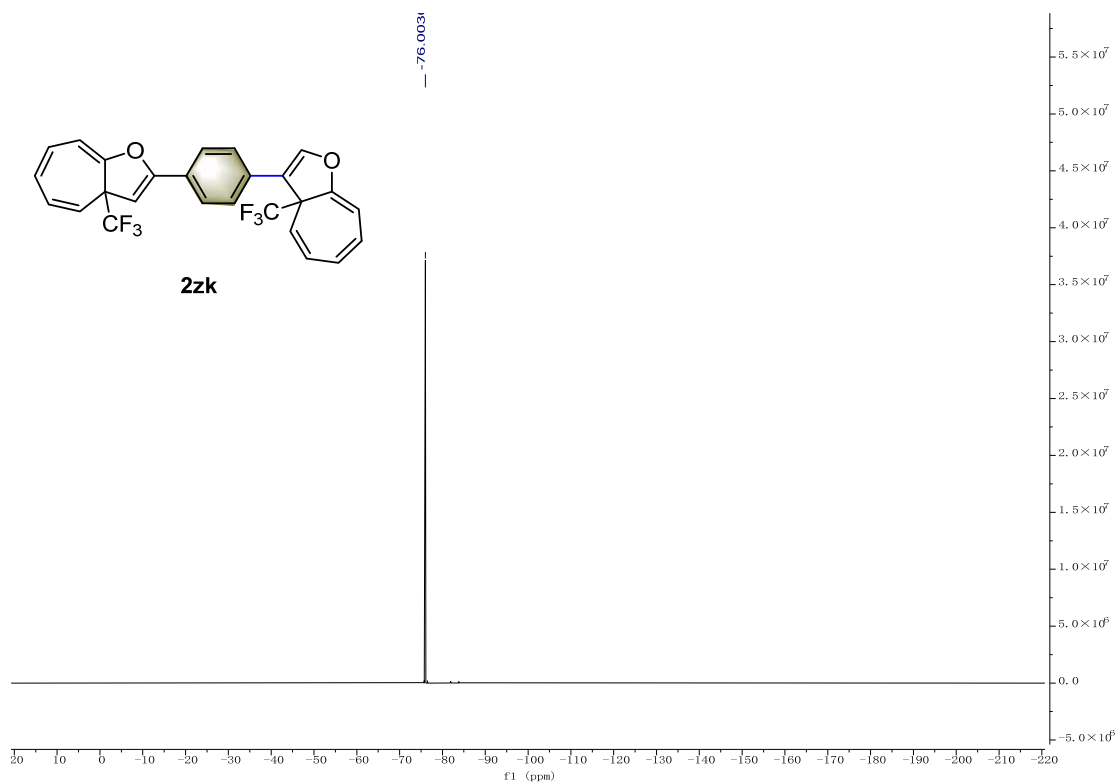 $^1\text{H}$  NMR (400 MHz,  $\text{CDCl}_3$ ) of compound **2zl**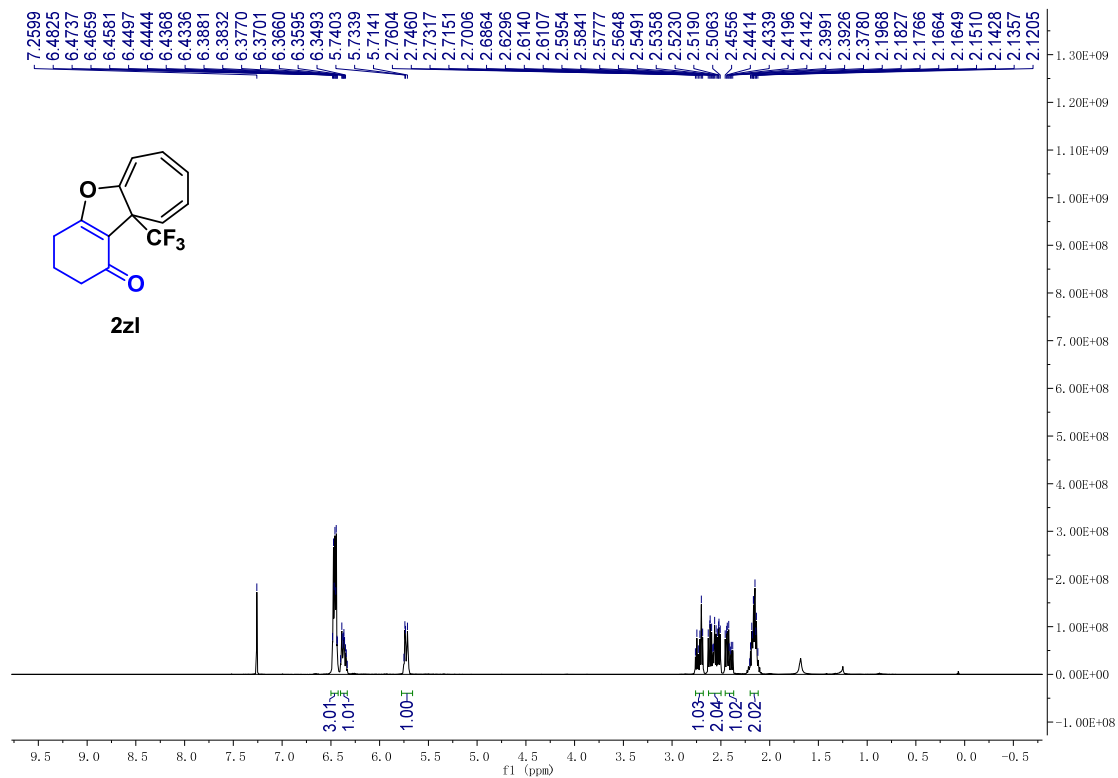



$^{13}\text{C}$  NMR (75 MHz,  $\text{CDCl}_3$ ) of compound **2zl**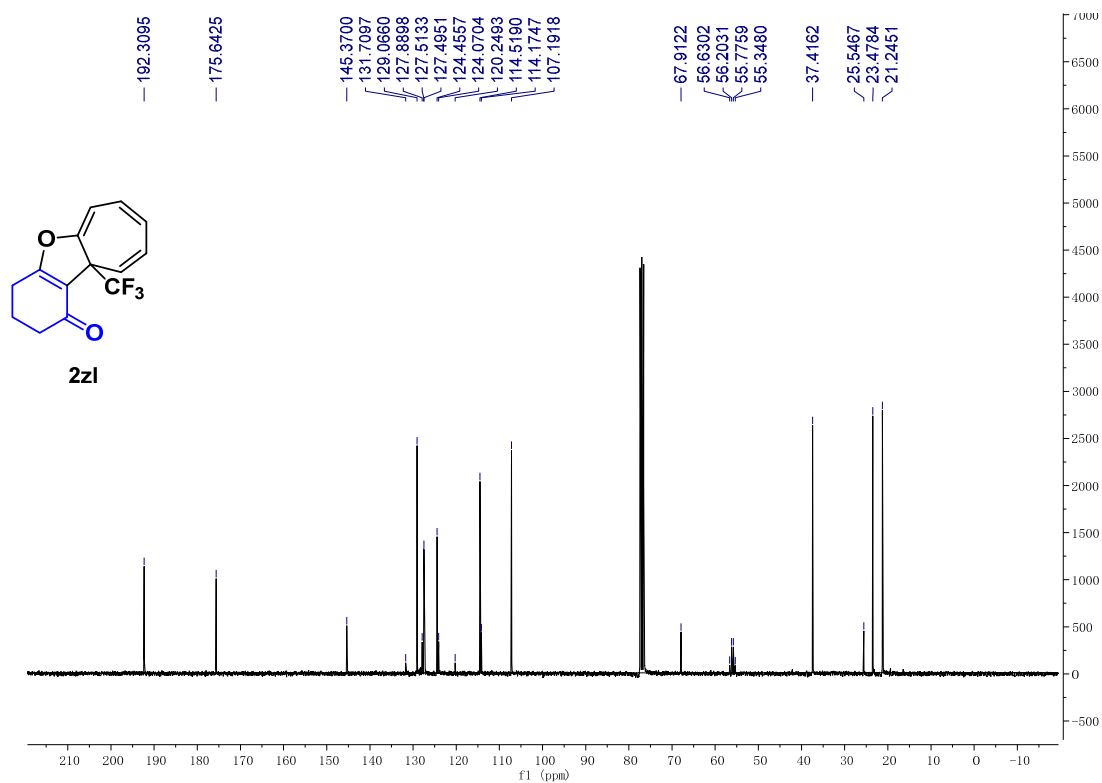 $^{19}\text{F}$  NMR (376 MHz,  $\text{CDCl}_3$ ) of compound **2zl**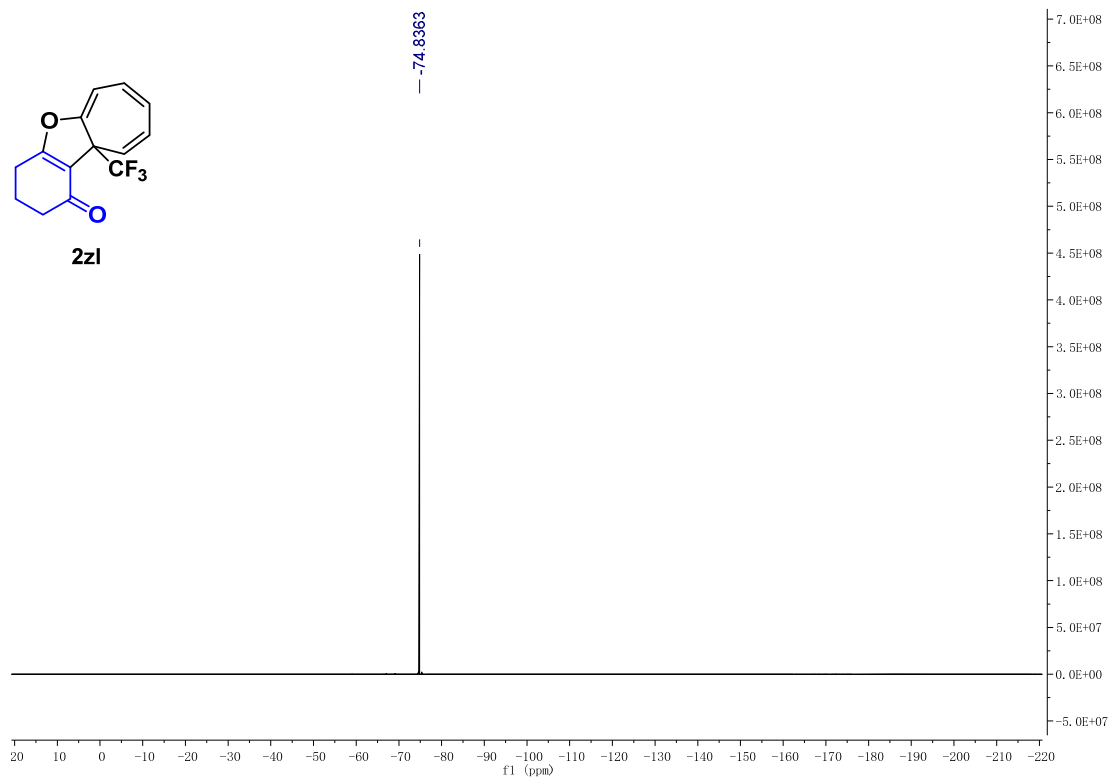

<sup>1</sup>H NMR (600 MHz, CDCl<sub>3</sub>) of compound **2zm**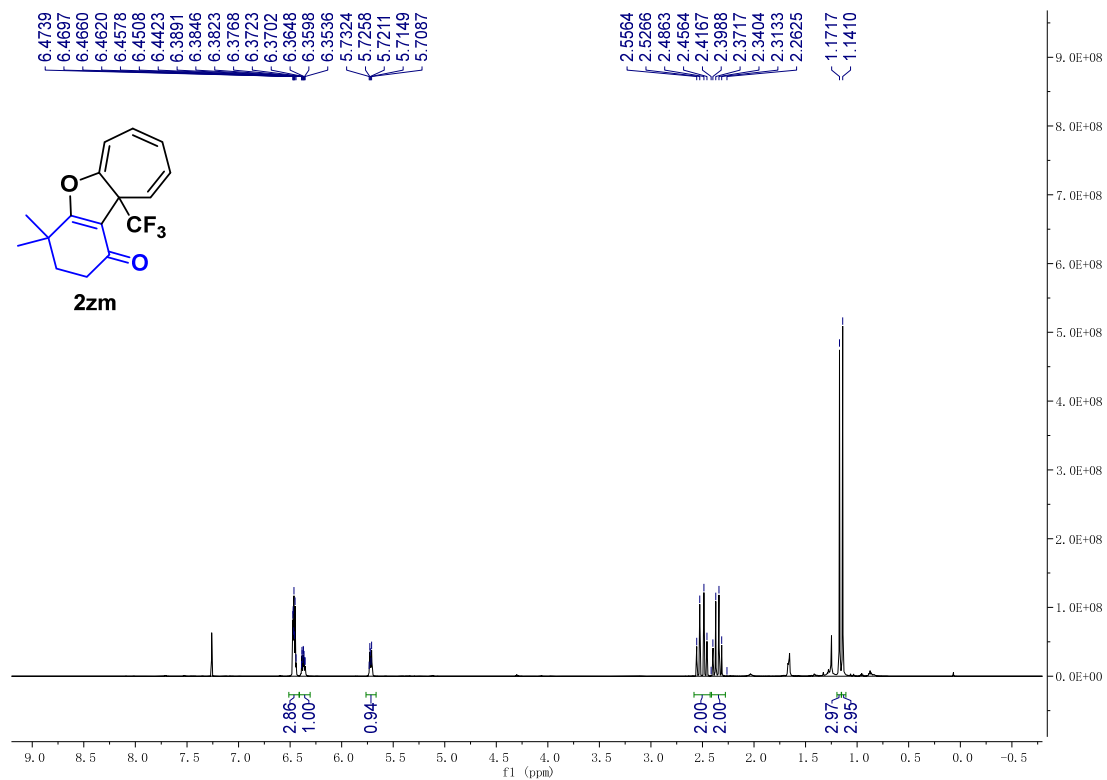<sup>13</sup>C NMR (101 MHz, CDCl<sub>3</sub>) of compound **2zm**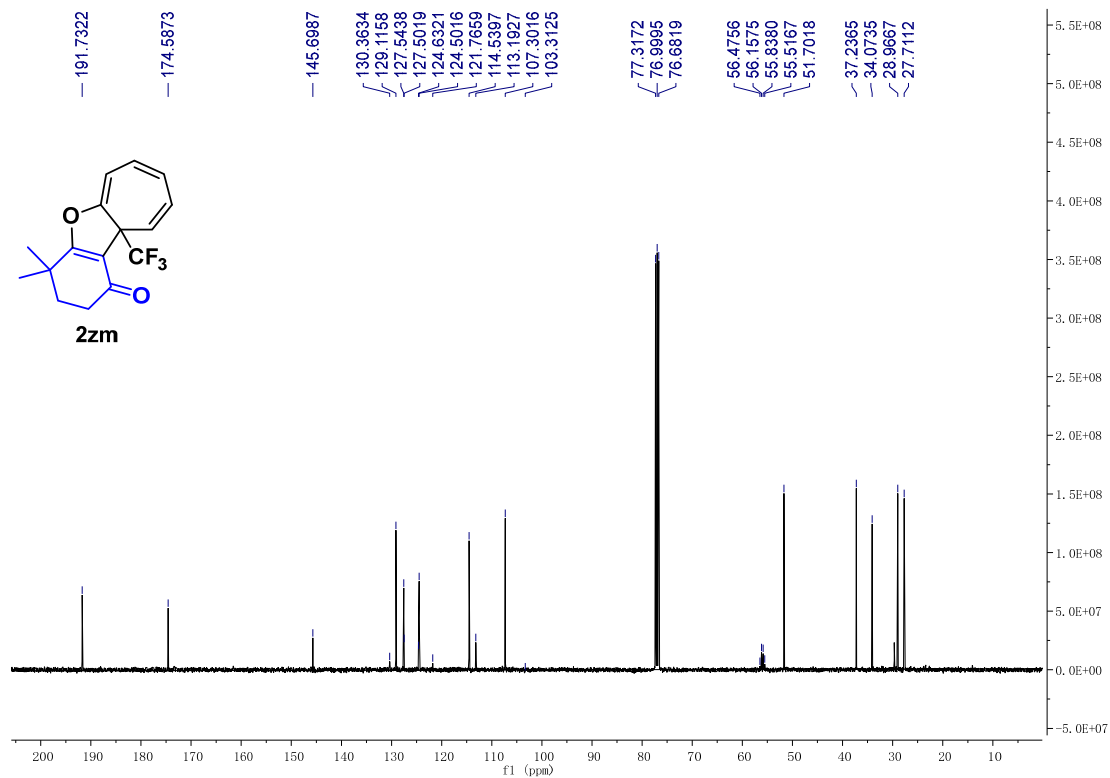

$^{19}\text{F}$  NMR (376 MHz,  $\text{CDCl}_3$ )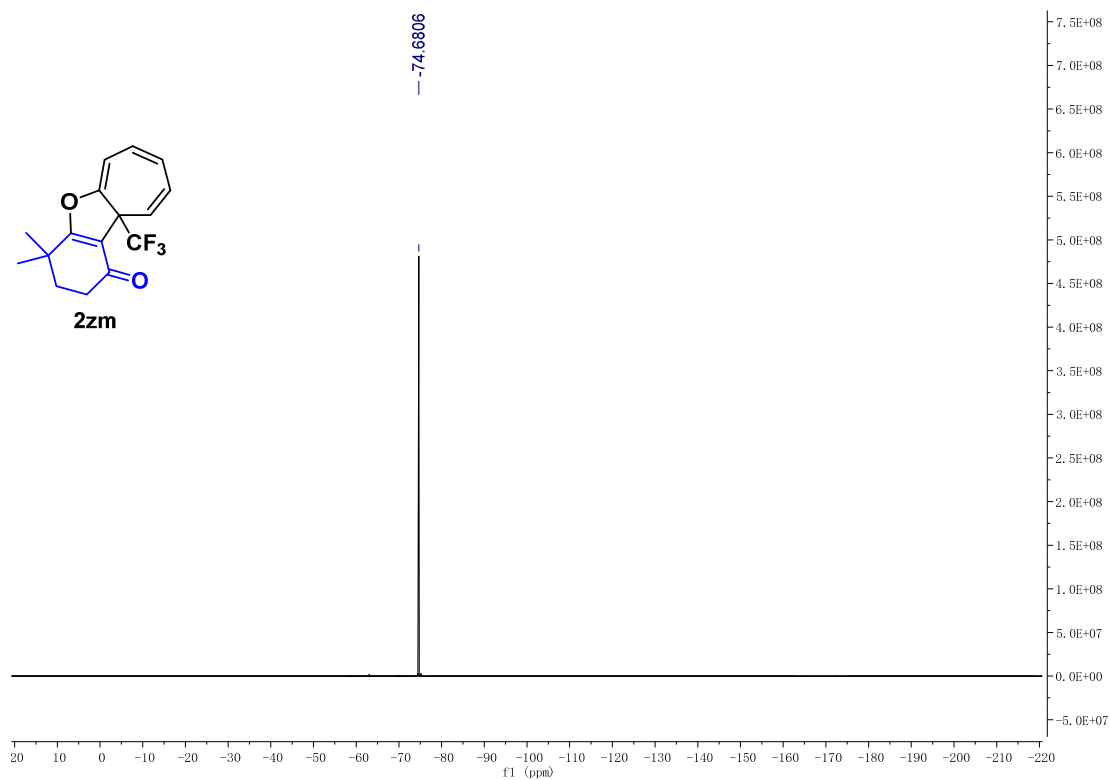 $^1\text{H}$  NMR (400 MHz,  $\text{CDCl}_3$ ) of compound **2zn**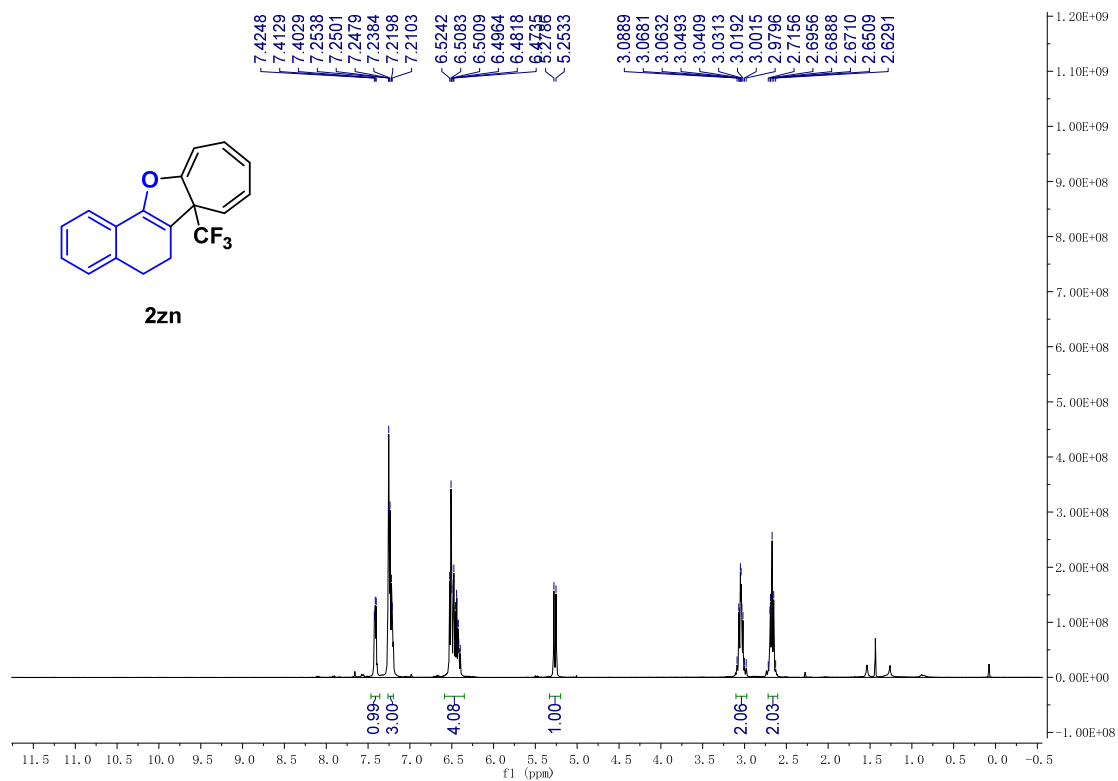

$^{13}\text{C}$  NMR (101 MHz,  $\text{CDCl}_3$ ) of compound **2zn**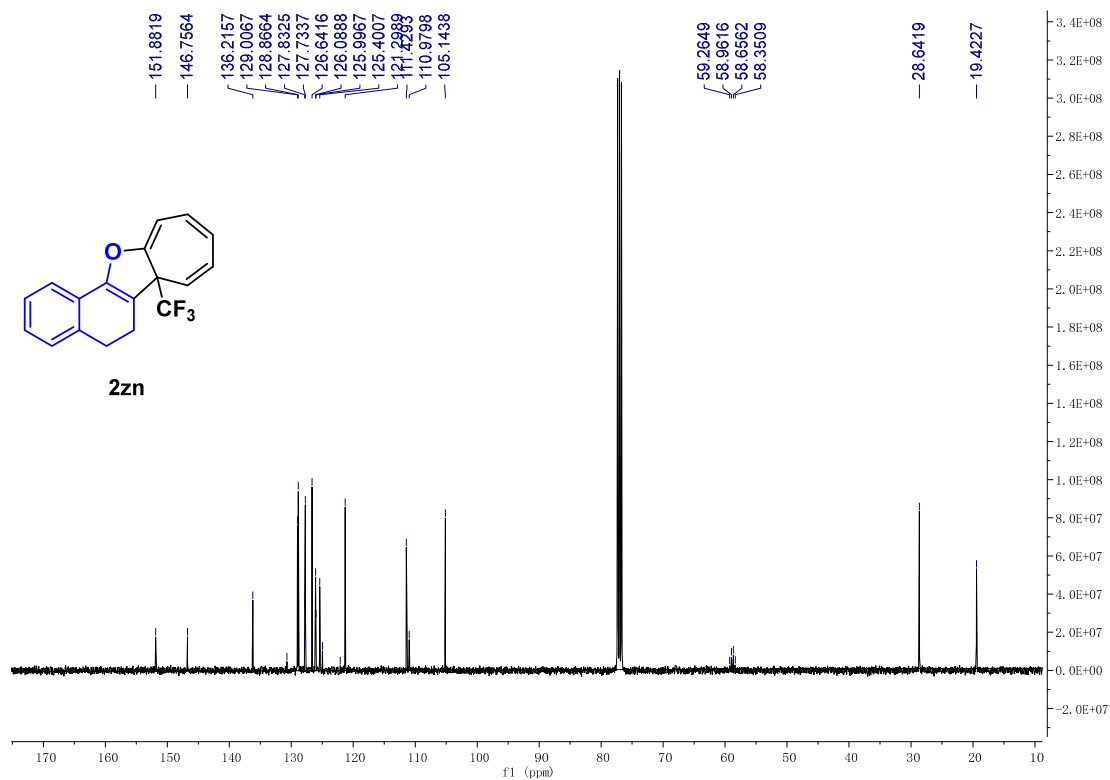 $^{19}\text{F}$  NMR (376 MHz,  $\text{CDCl}_3$ ) of compound **2zn**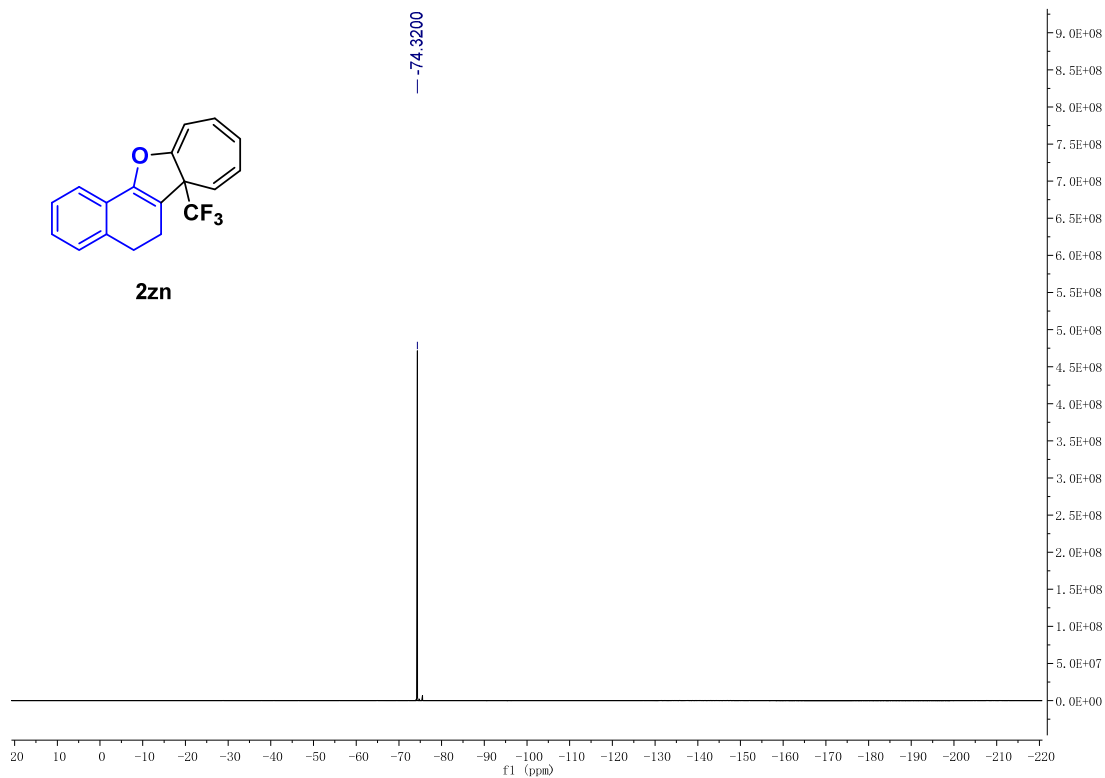

$^1\text{H}$  NMR (400 MHz,  $\text{CDCl}_3$ ) of compound **4a**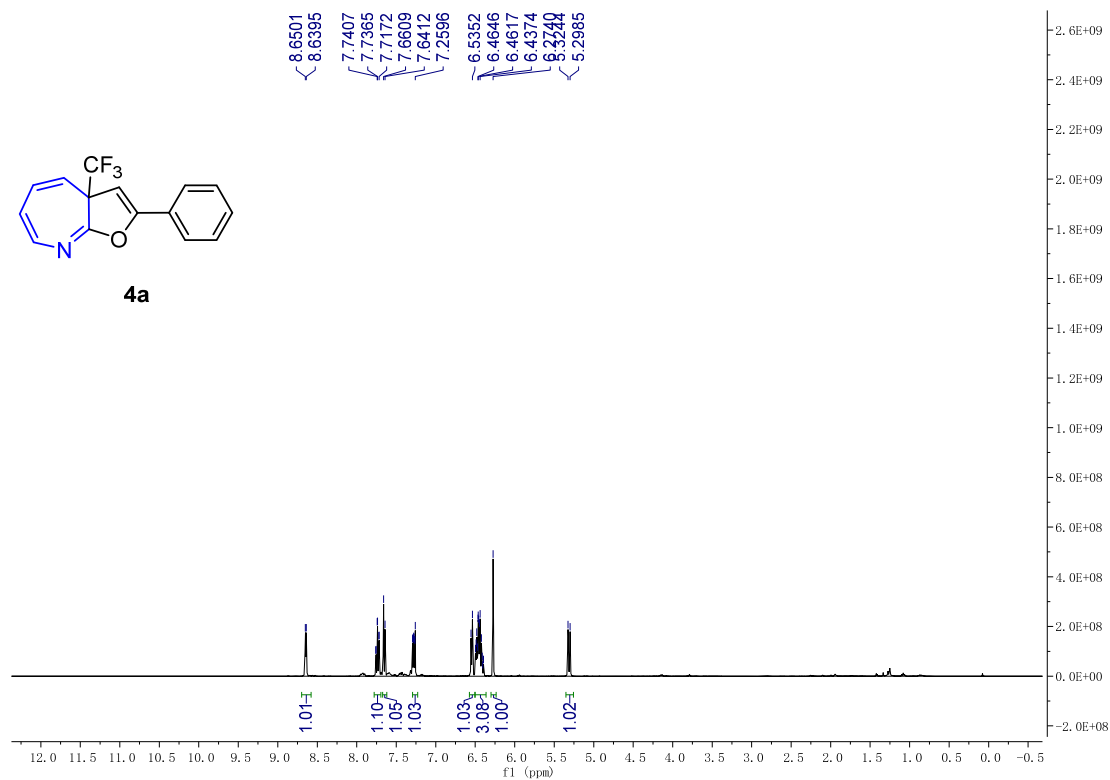 $^{13}\text{C}$  NMR (101 MHz,  $\text{CDCl}_3$ ) of compound **4a**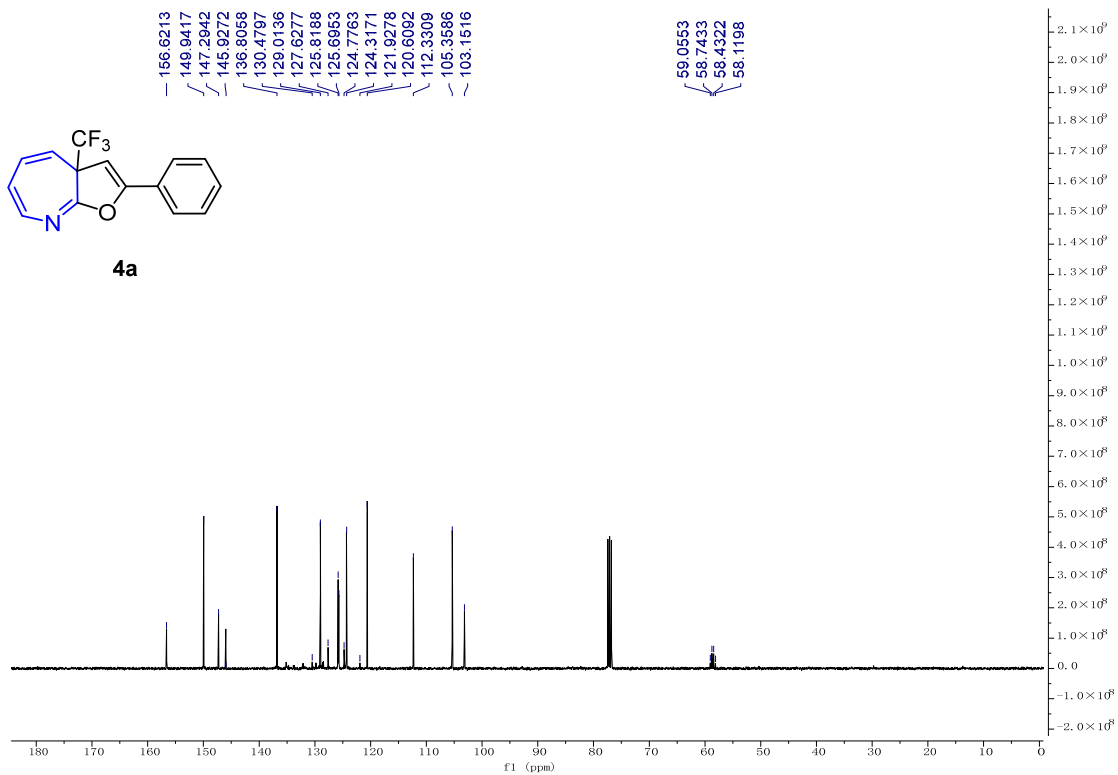

$^{19}\text{F}$  NMR (376 MHz,  $\text{CDCl}_3$ ) of compound **4a**

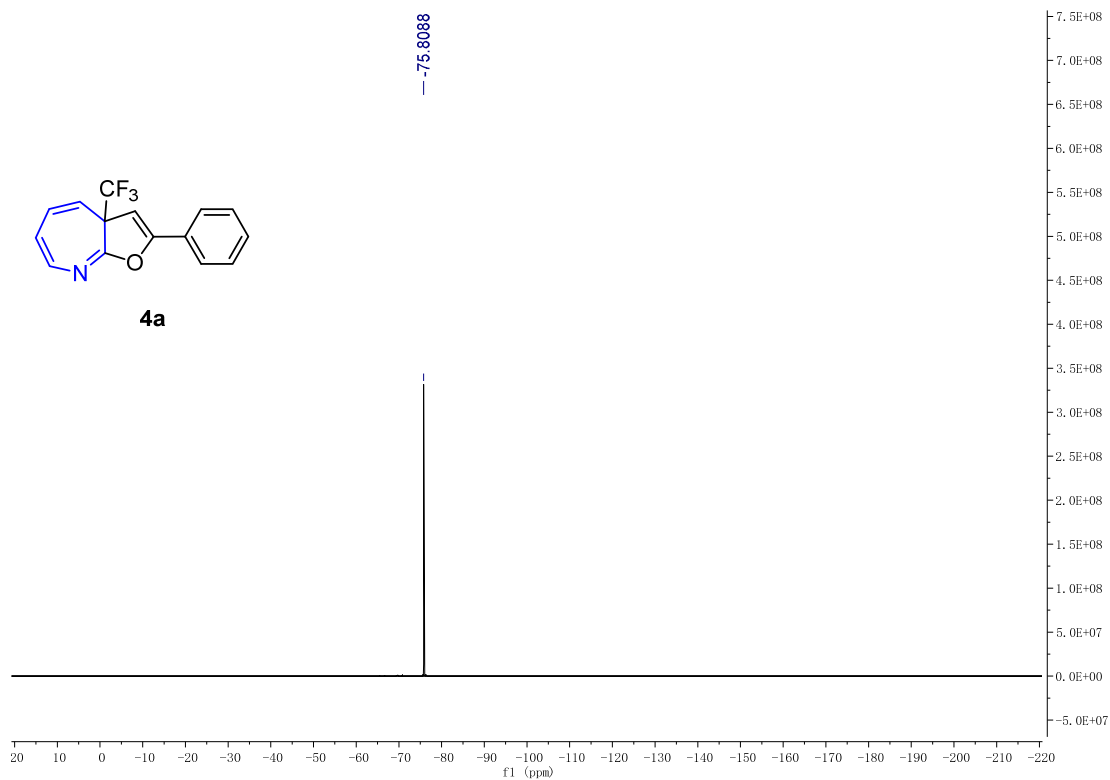

$^1\text{H}$  NMR (600 MHz,  $\text{CDCl}_3$ ) of compound **4b**

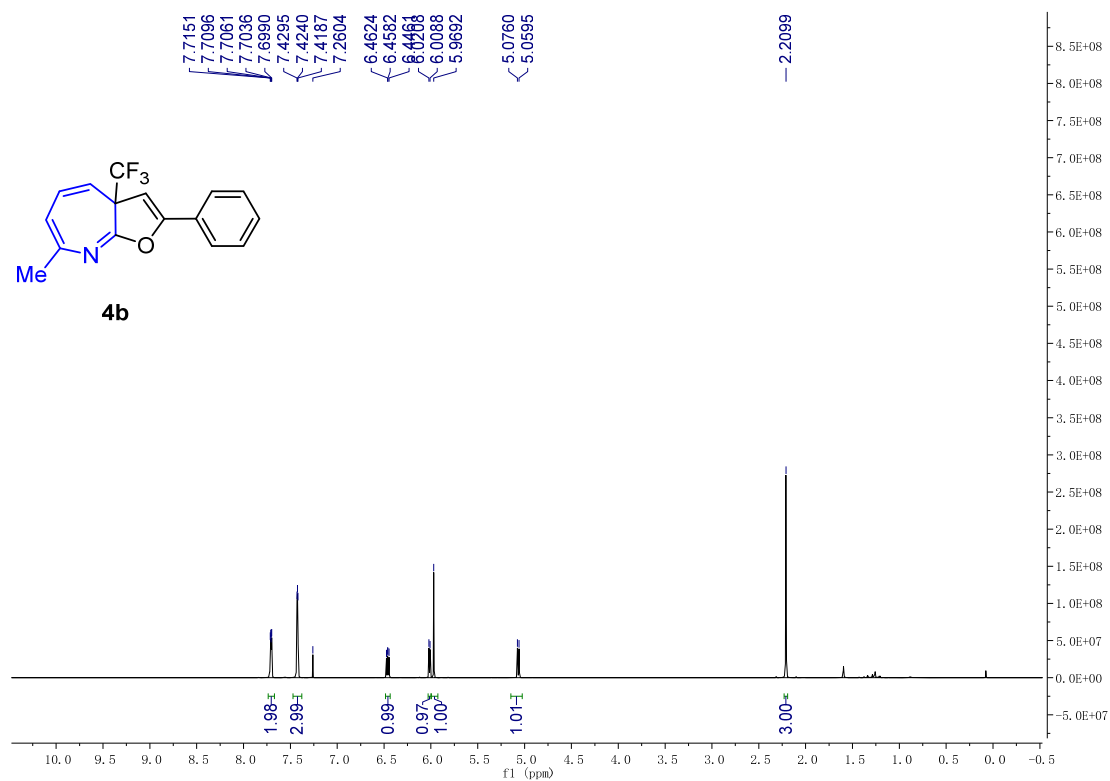

$^{13}\text{C}$  NMR (151 MHz,  $\text{CDCl}_3$ ) of compound **4b**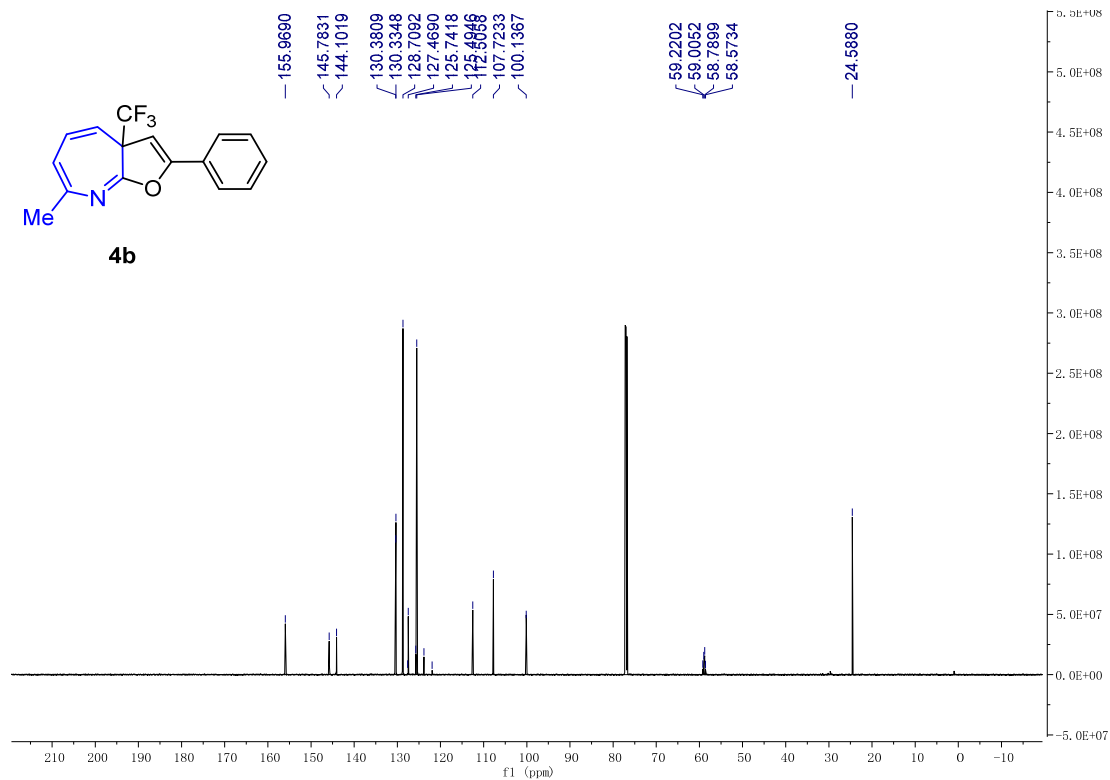 $^{19}\text{F}$  NMR (565 MHz,  $\text{CDCl}_3$ ) of compound **4b**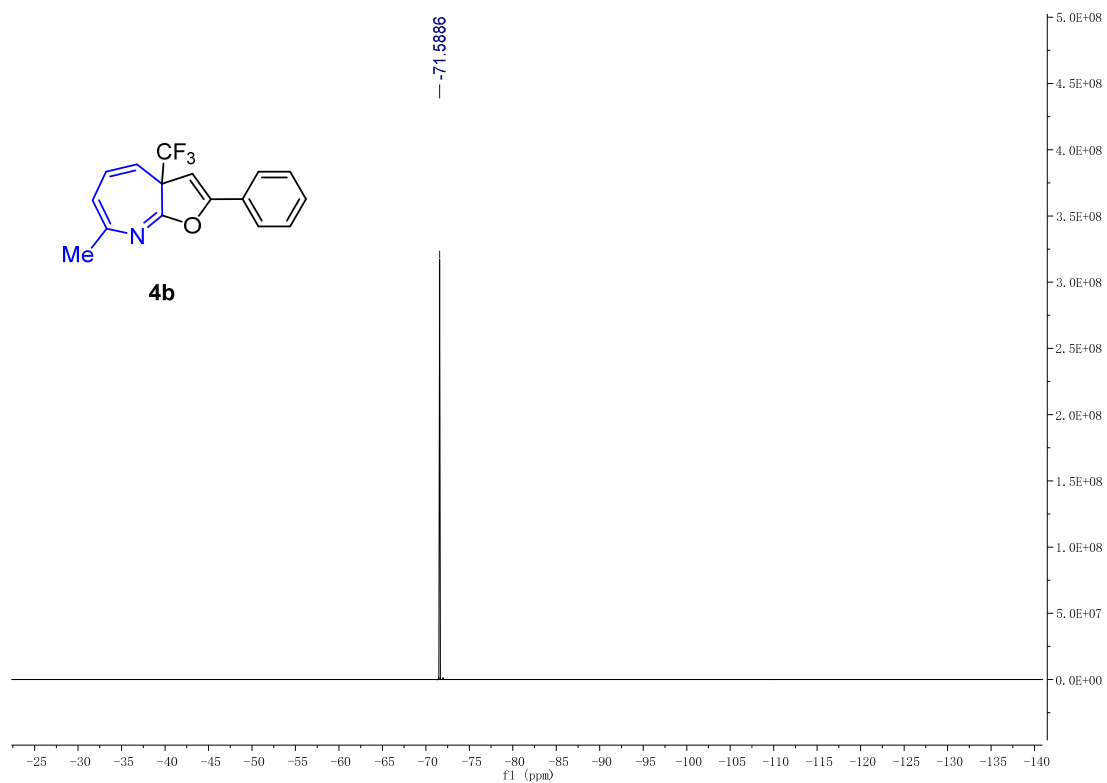

$^1\text{H}$  NMR (600 MHz,  $\text{CD}_2\text{Cl}_2$ ) of compound **4c**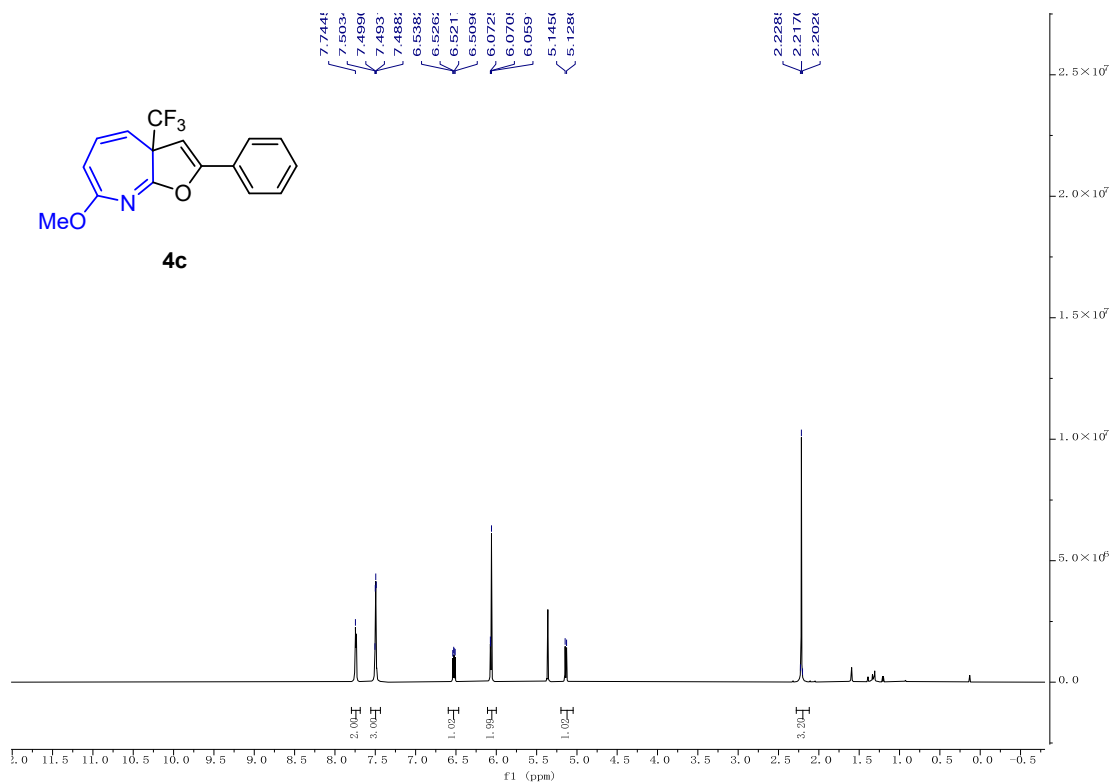 $^{13}\text{C}$  NMR (151 MHz,  $\text{CD}_2\text{Cl}_2$ ) of compound **4c**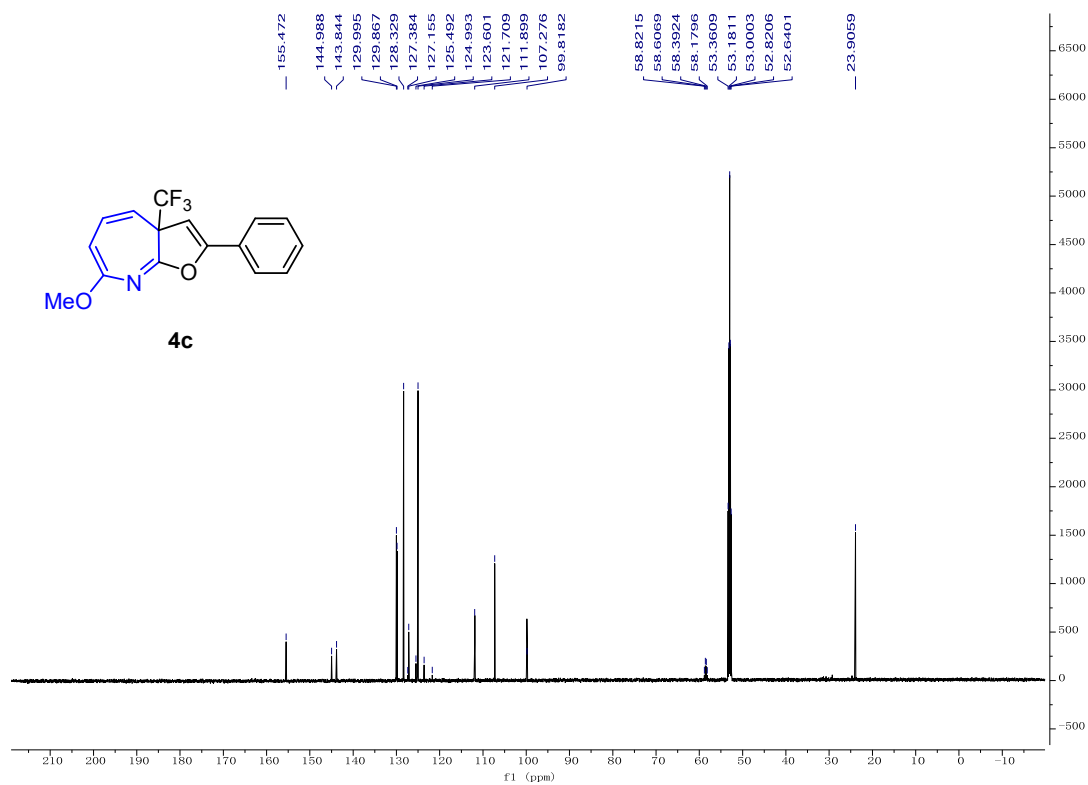



$^{19}\text{F}$  NMR (565 MHz,  $\text{CD}_2\text{Cl}_2$ )  $\delta$  -72.0 of compound **4c**

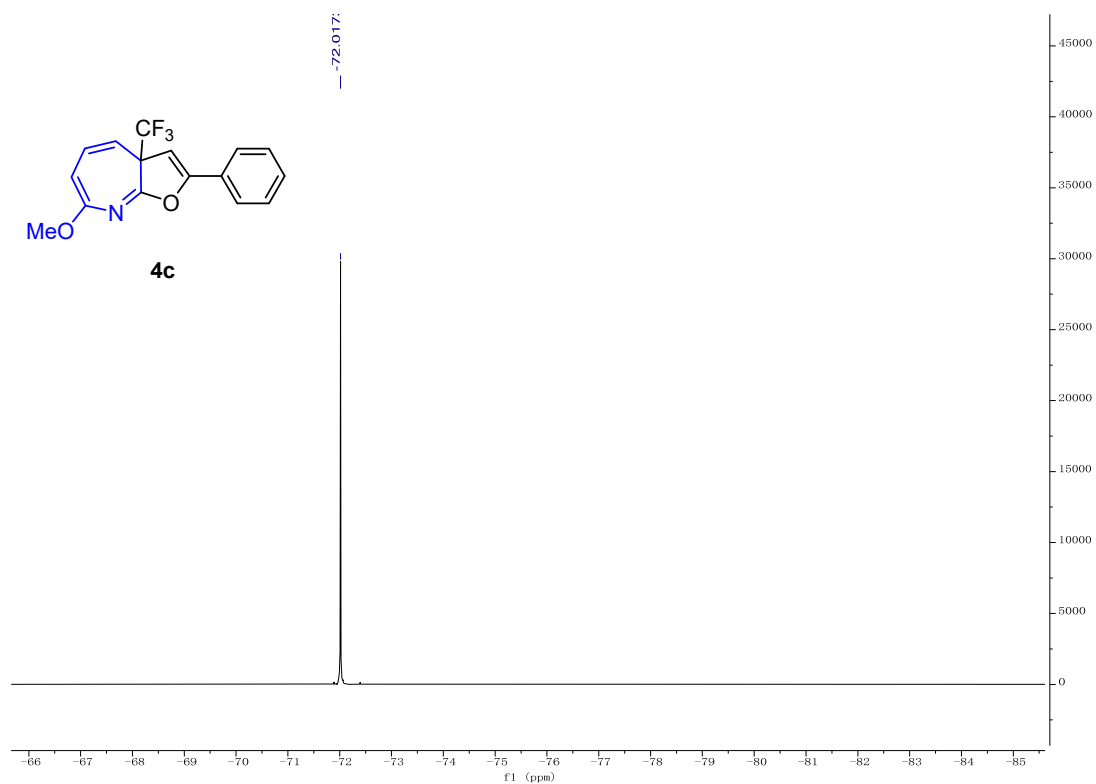

$^1\text{H}$  NMR (400 MHz,  $\text{CDCl}_3$ ) of compound **4d**

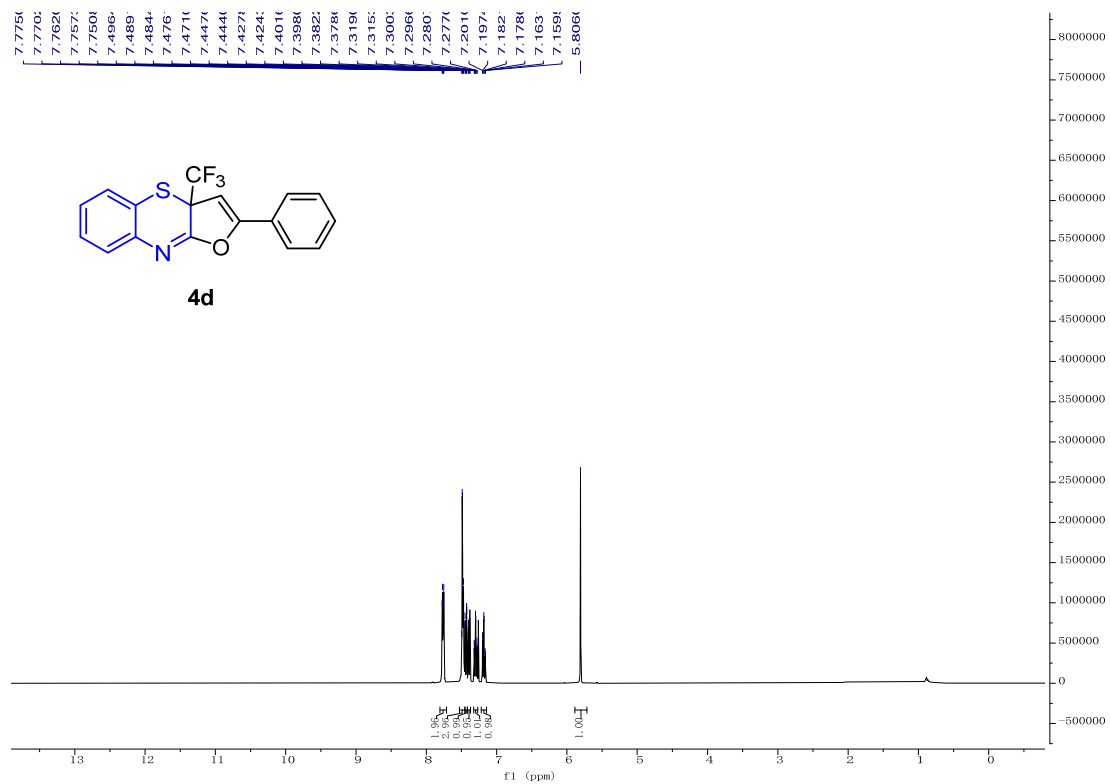

$^{13}\text{C}$  NMR (101 MHz,  $\text{CDCl}_3$ ) of compound **4d**

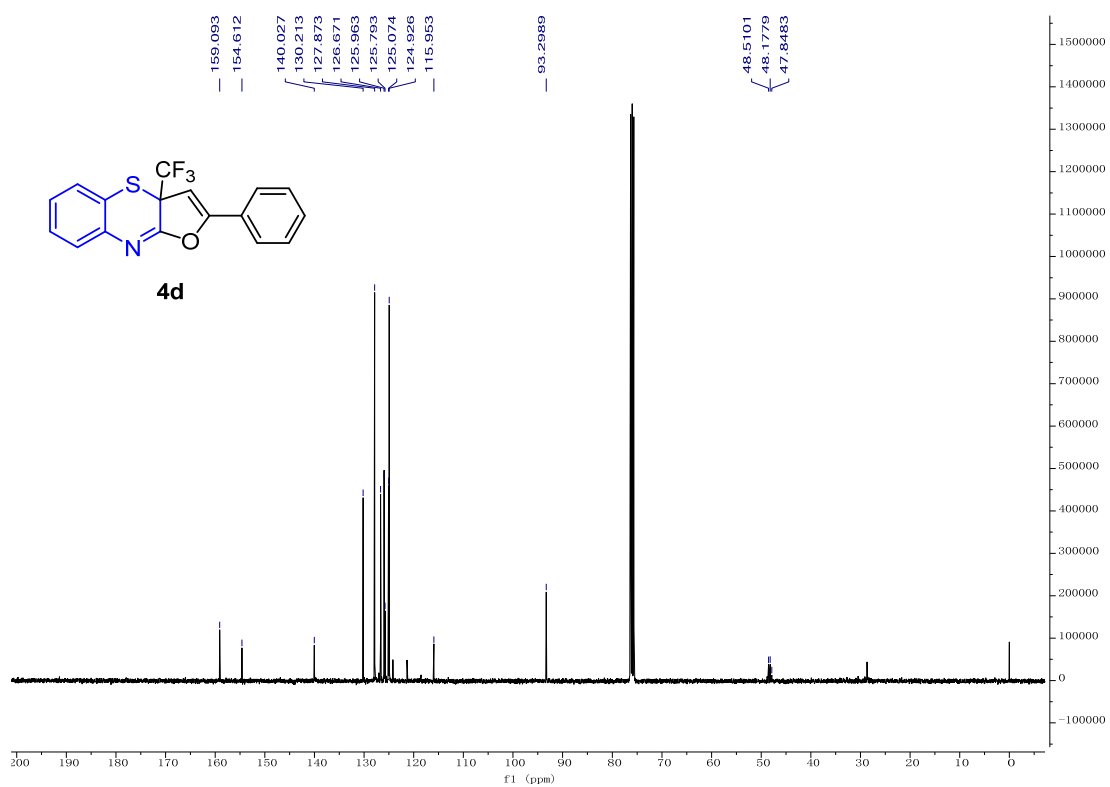

<sup>19</sup>F NMR (376 MHz, CDCl<sub>3</sub>) of compound 4d

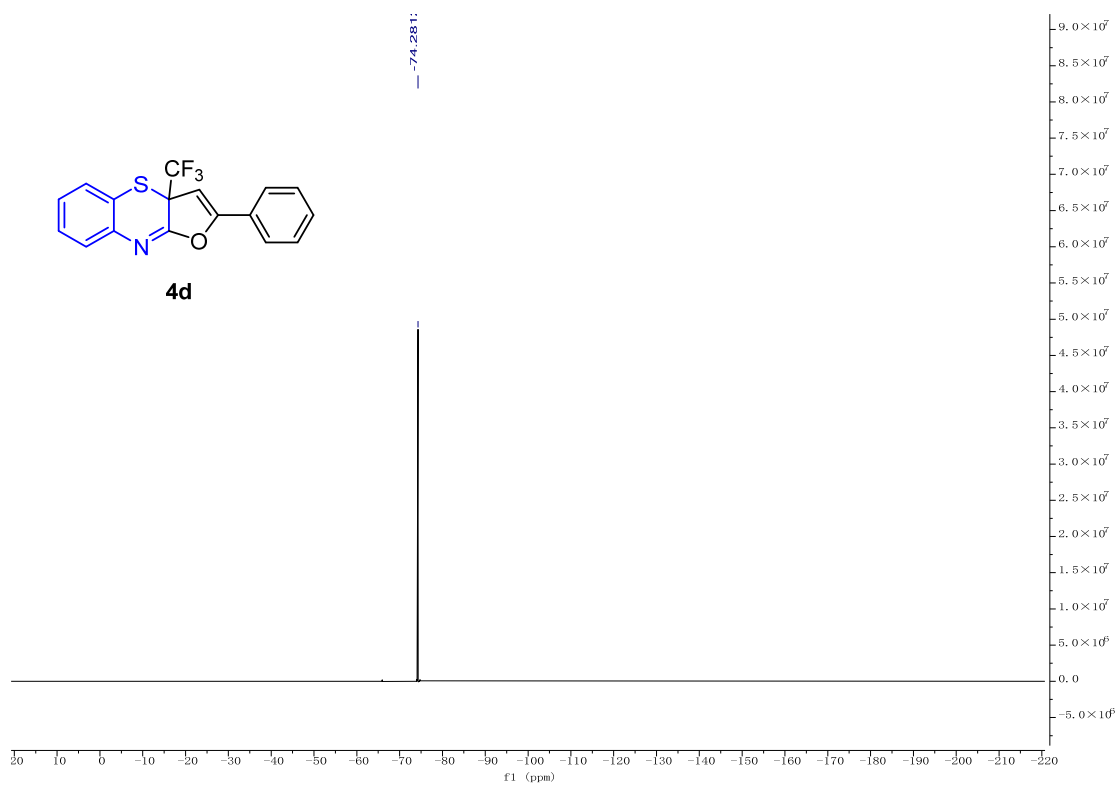

$^1\text{H}$  NMR (600 MHz,  $\text{CDCl}_3$ ) of compound **4e**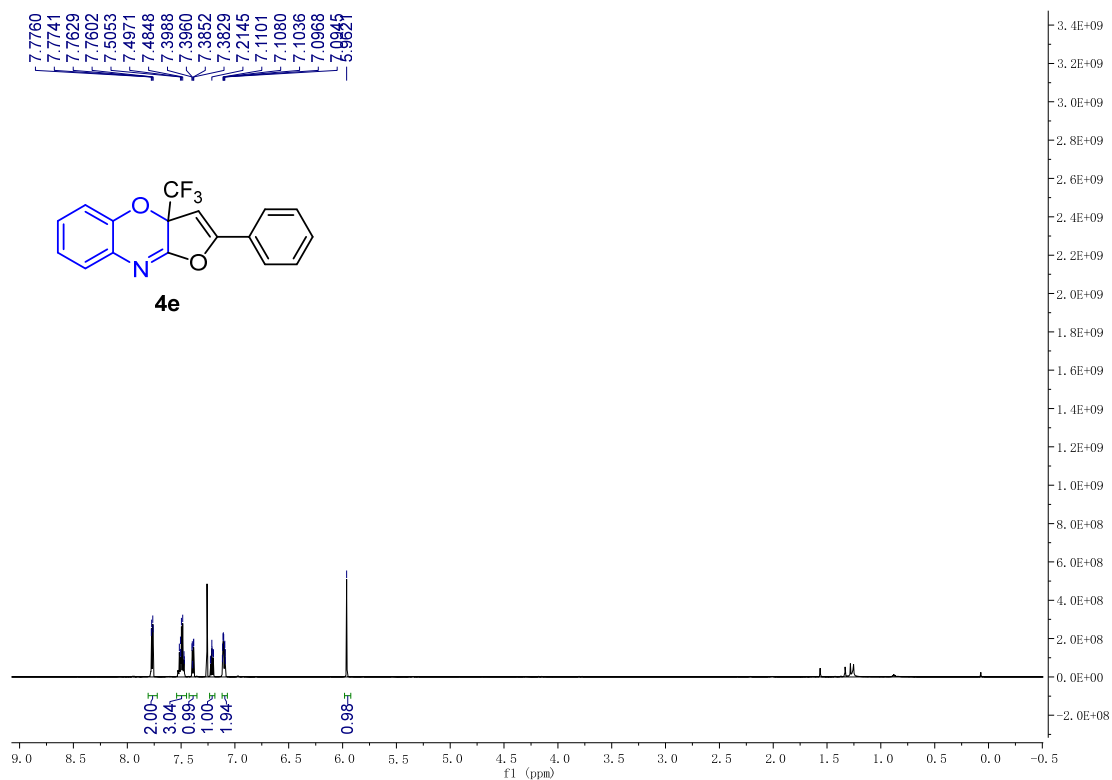 $^{13}\text{C}$  NMR (151 MHz,  $\text{CDCl}_3$ ) of compound **4e**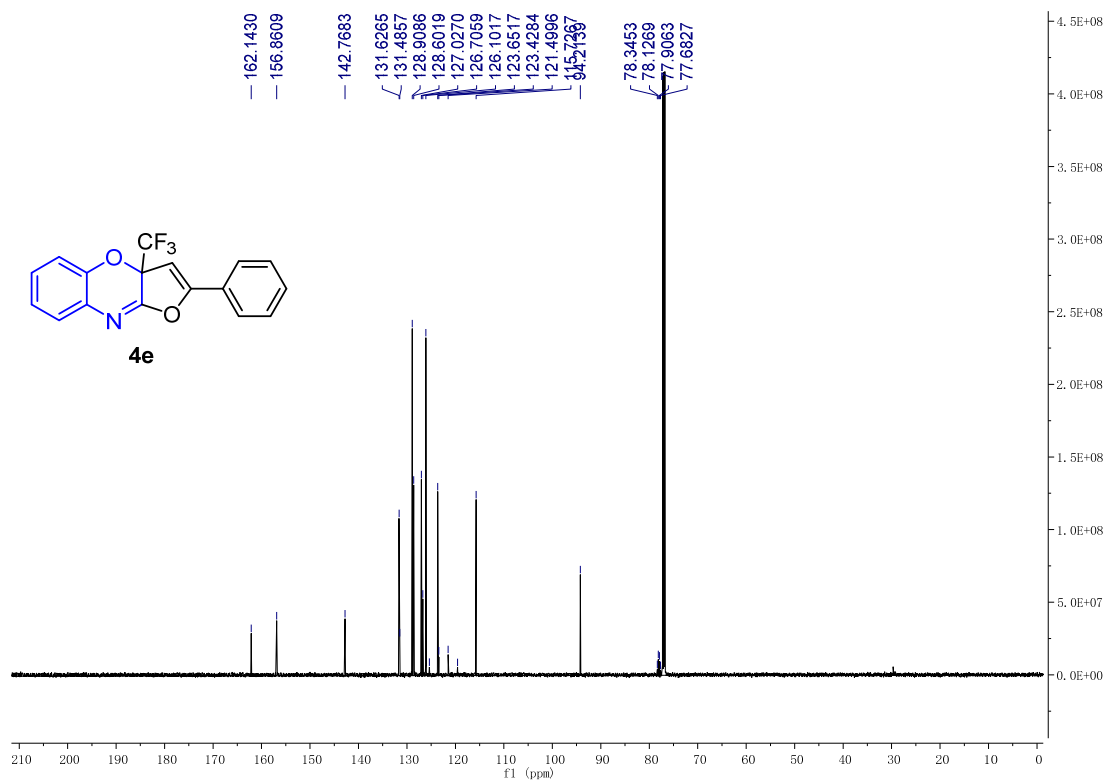

$^{19}\text{F}$  NMR (565 MHz,  $\text{CDCl}_3$ ) of compound **4e**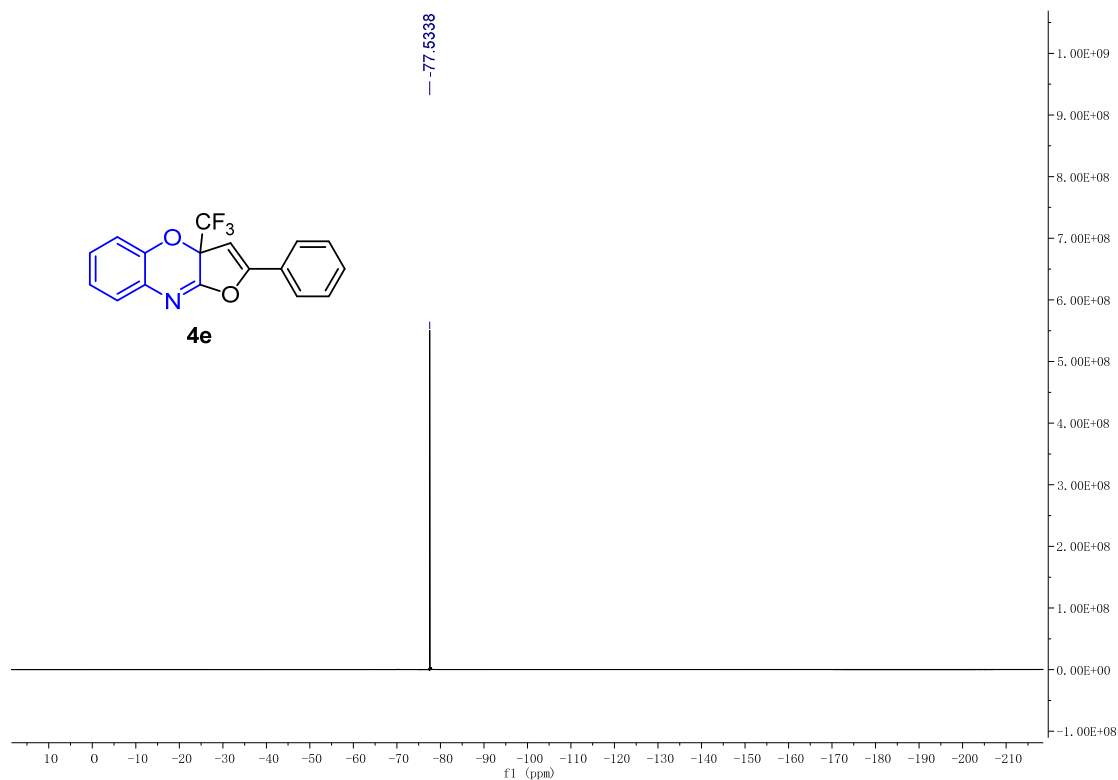 $^1\text{H}$  NMR (600 MHz,  $\text{CDCl}_3$ ) of compound **6a**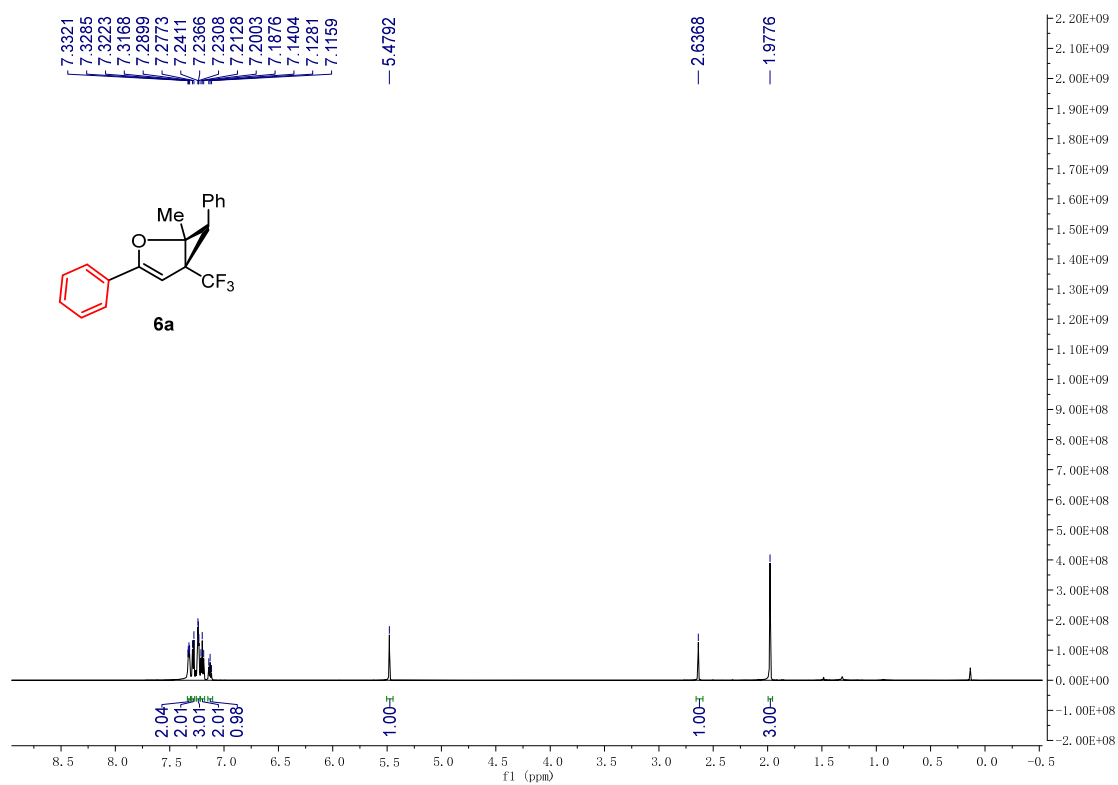

$^{13}\text{C}$  NMR (151 MHz,  $\text{CDCl}_3$ ) of compound **6a**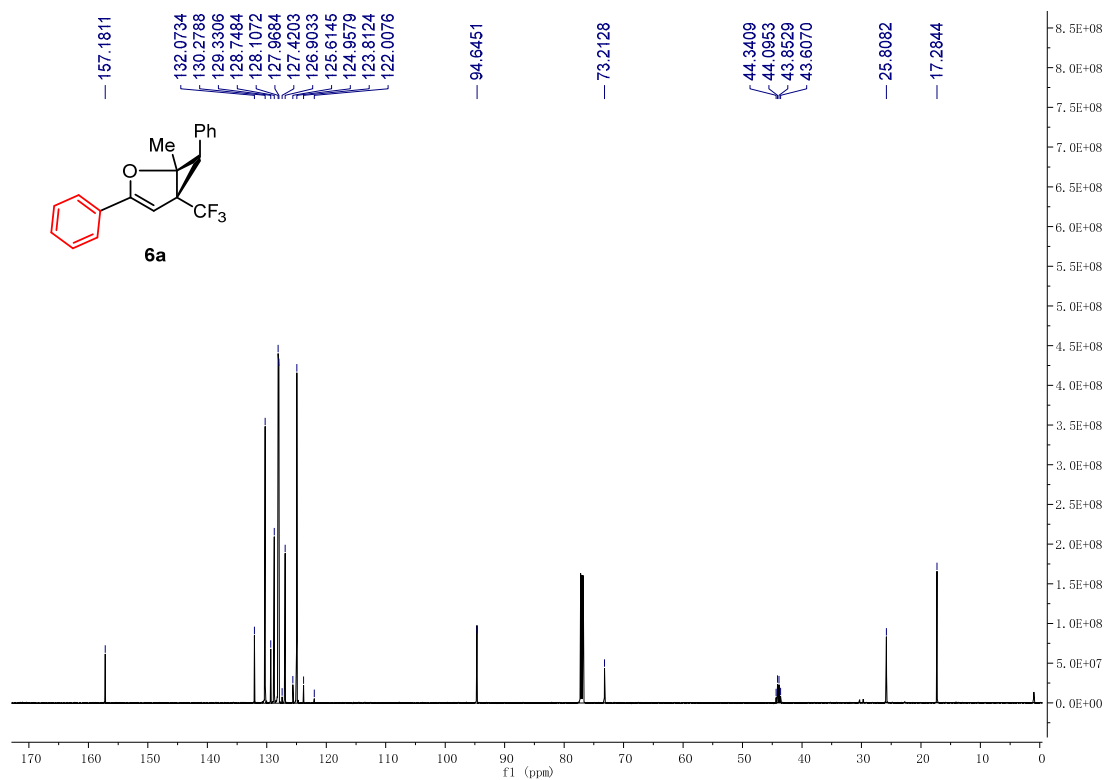 $^{19}\text{F}$  NMR (565 MHz,  $\text{CDCl}_3$ ) of compound **6a**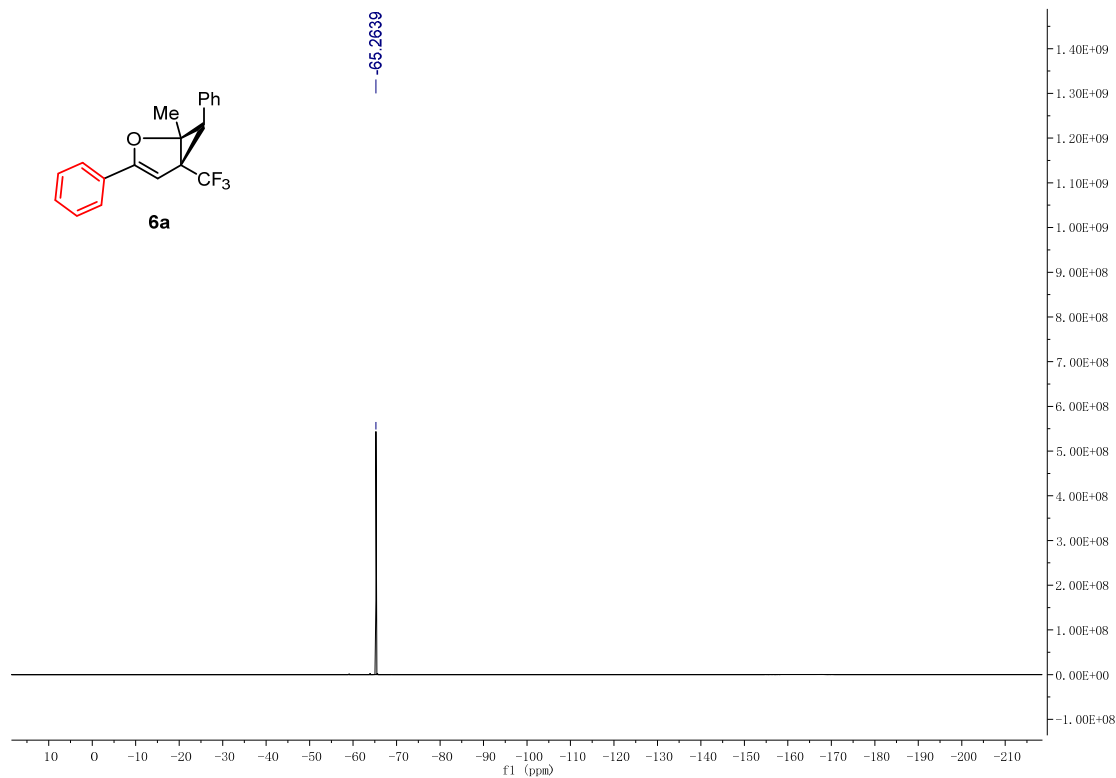

$^1\text{H}$  NMR (600 MHz,  $\text{CDCl}_3$ ) of compound **6b**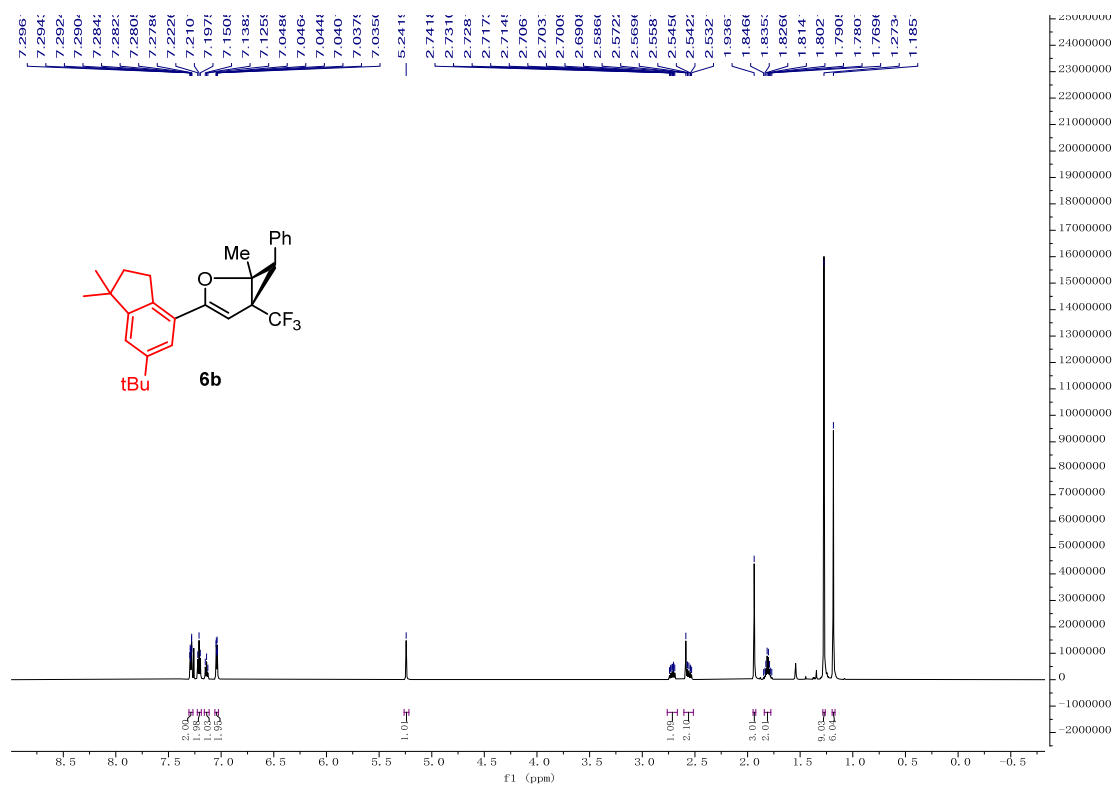 $^{13}\text{C}$  NMR (151 MHz,  $\text{CDCl}_3$ ) of compound **6b**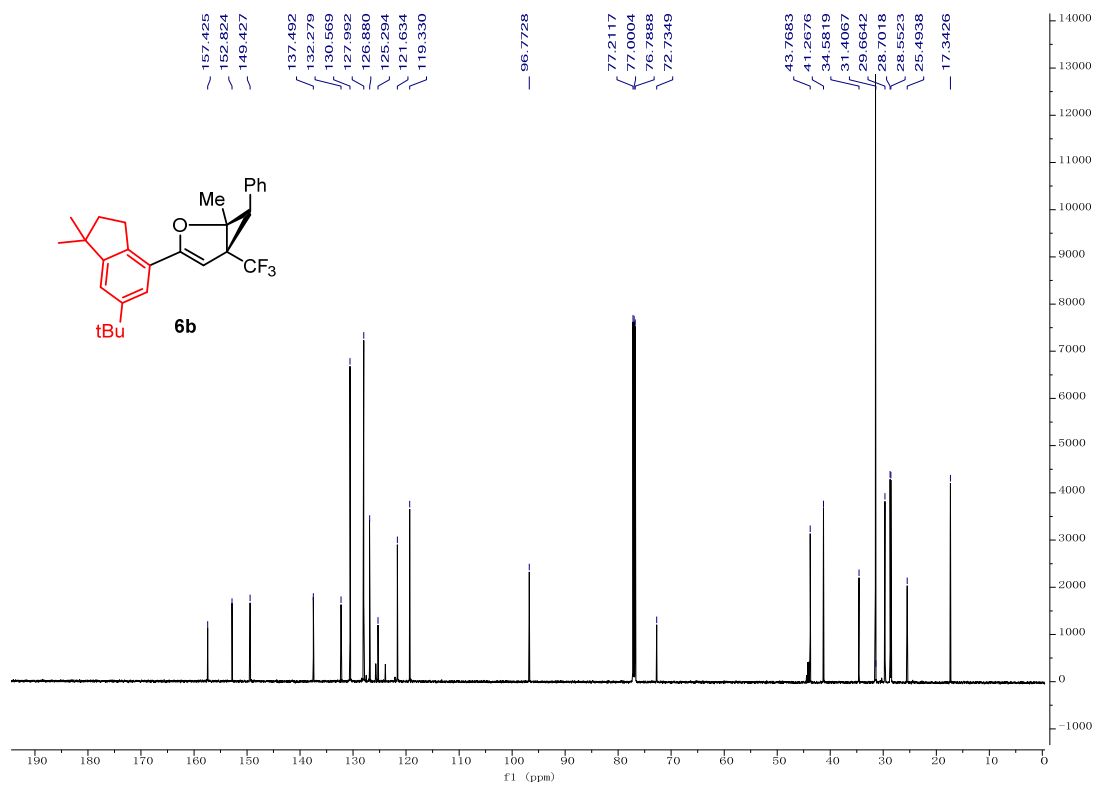

$^{19}\text{F}$  NMR (565 MHz,  $\text{CDCl}_3$ ) of compound **6b**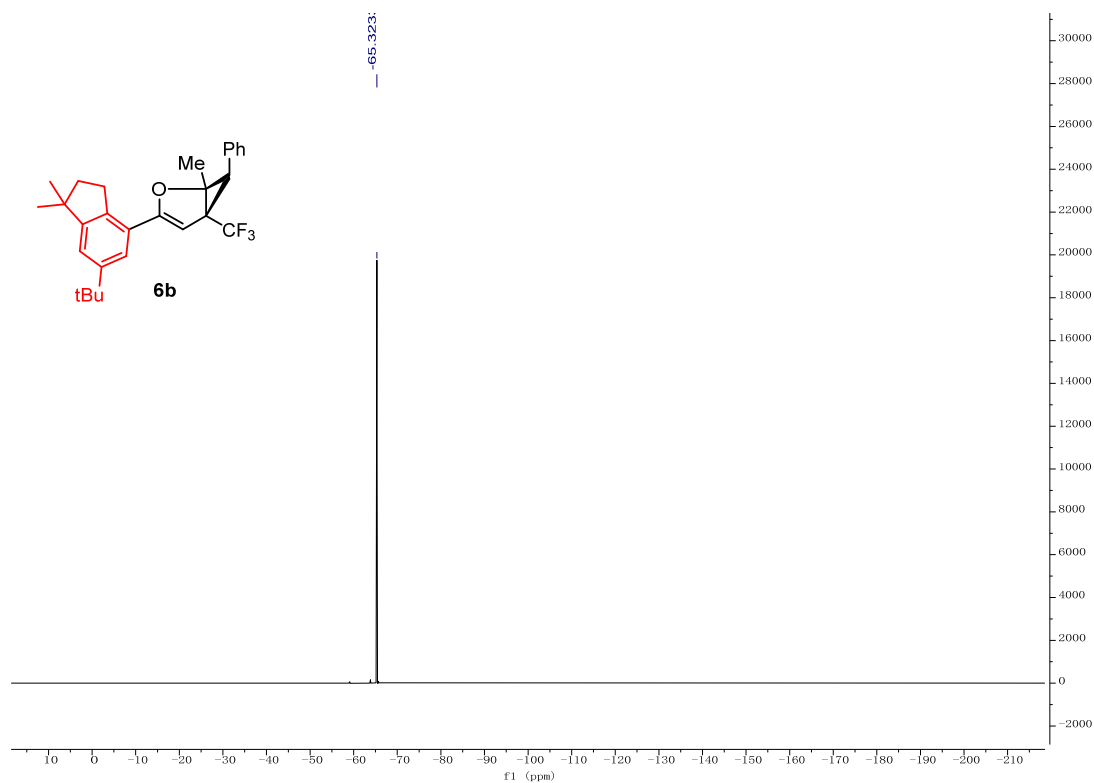 $^1\text{H}$  NMR (600 MHz,  $\text{CDCl}_3$ ) of compound **6c**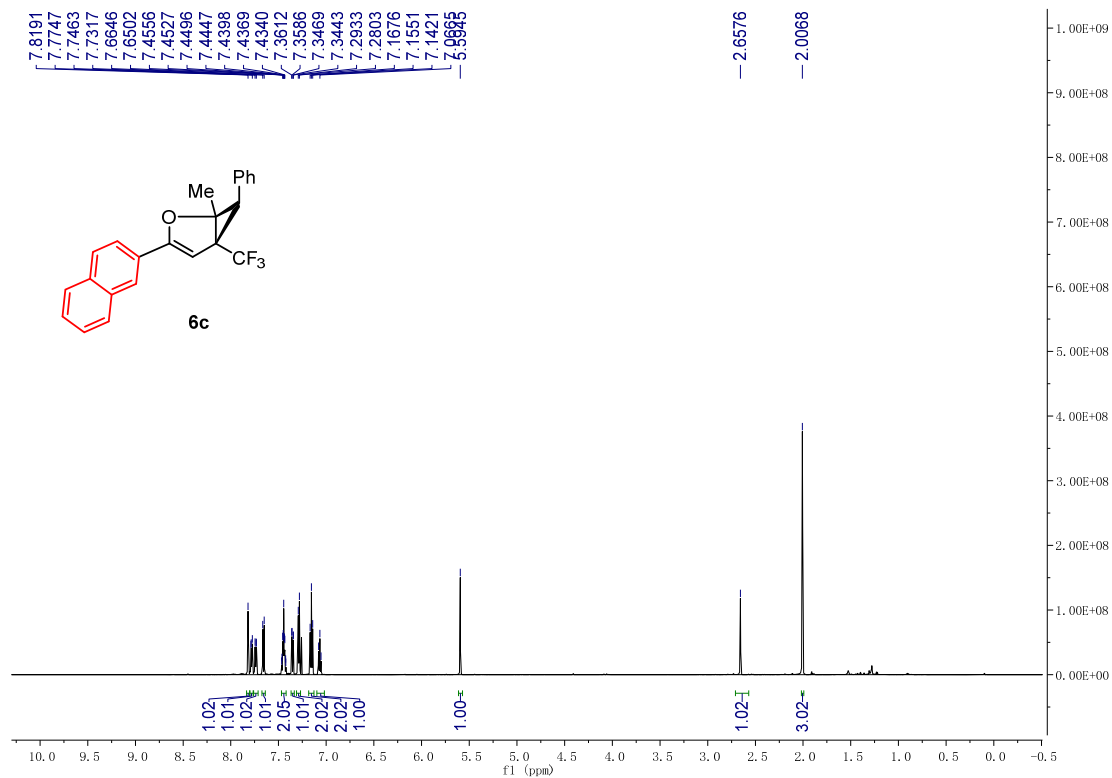

$^{13}\text{C}$  NMR (151 MHz,  $\text{CDCl}_3$ ) of compound **6c**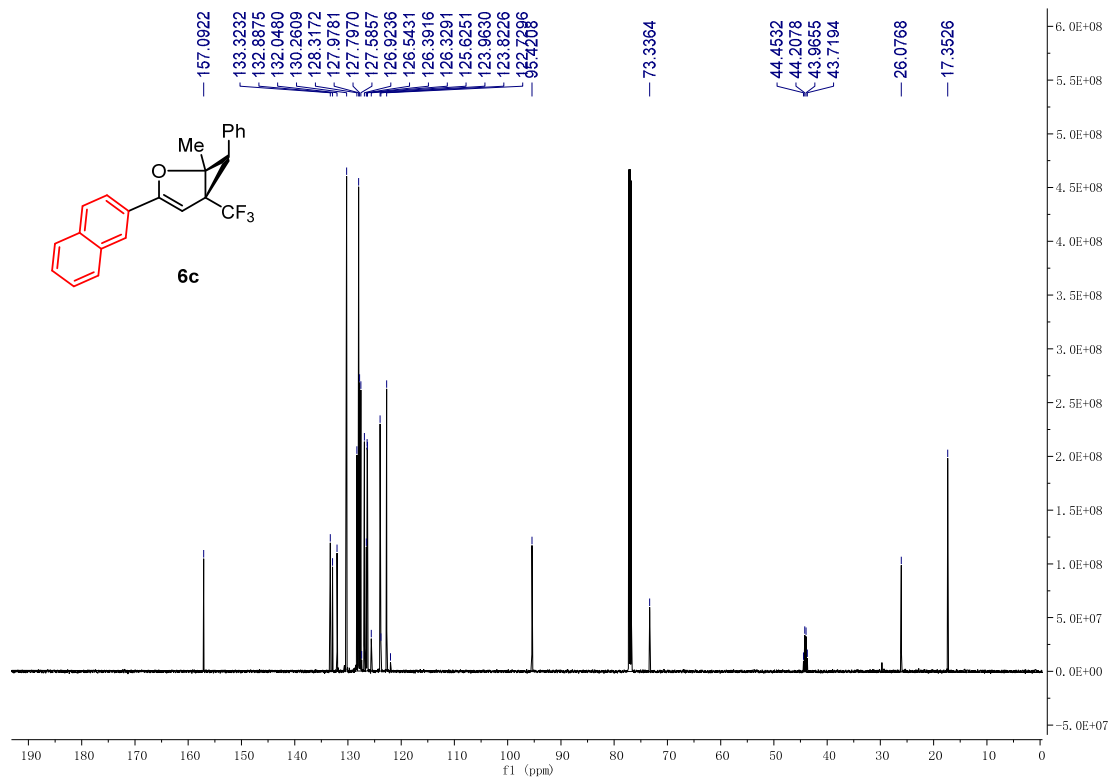 $^{19}\text{F}$  NMR (565 MHz,  $\text{CDCl}_3$ ) of compound **6c**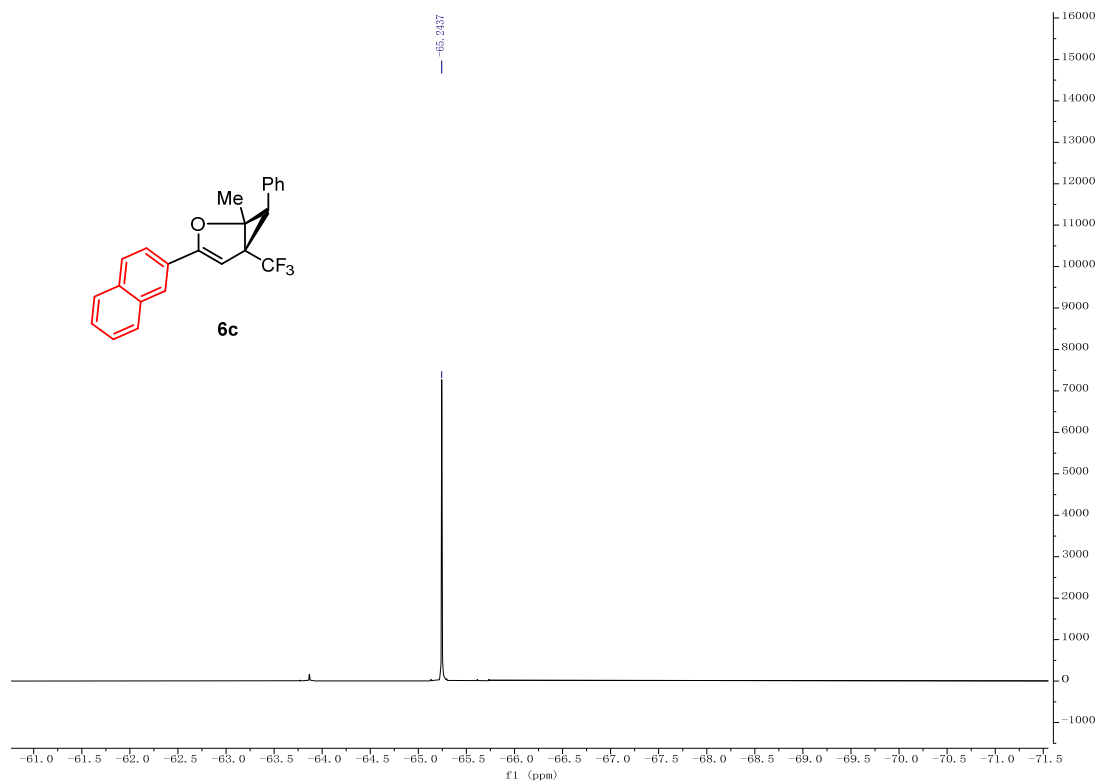



$^1\text{H}$  NMR (600 MHz,  $\text{CDCl}_3$ ) of compound **6d**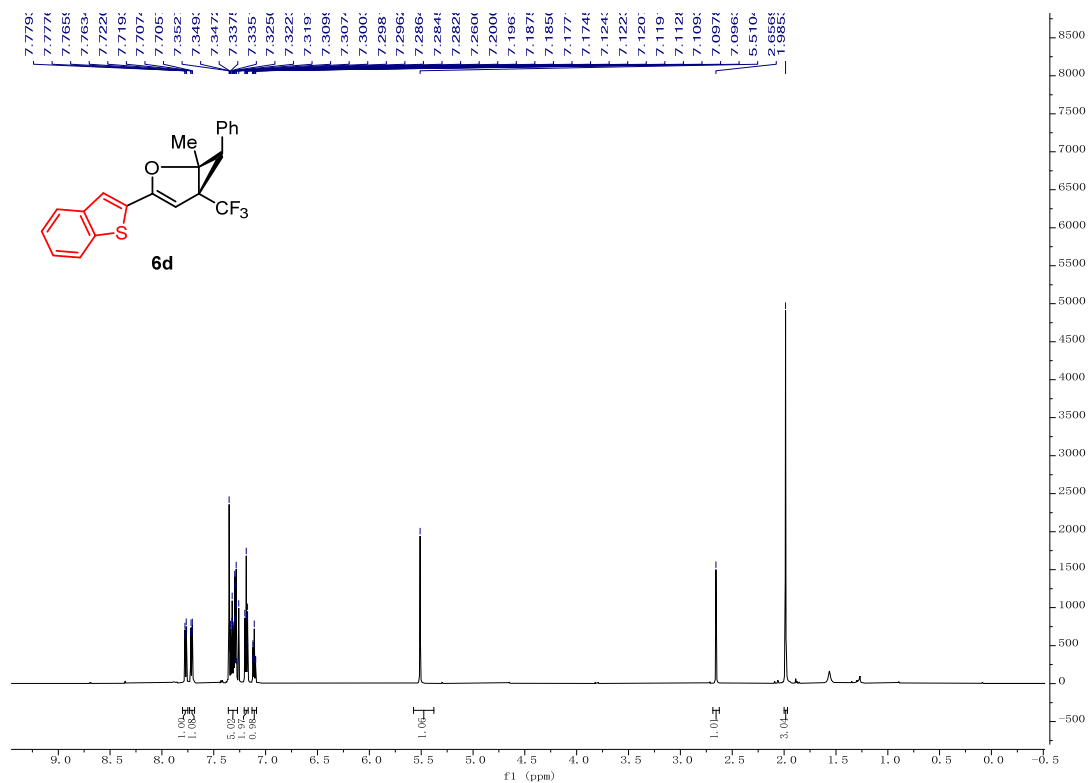 $^{13}\text{C}$  NMR (151 MHz,  $\text{CDCl}_3$ ) of compound **6d**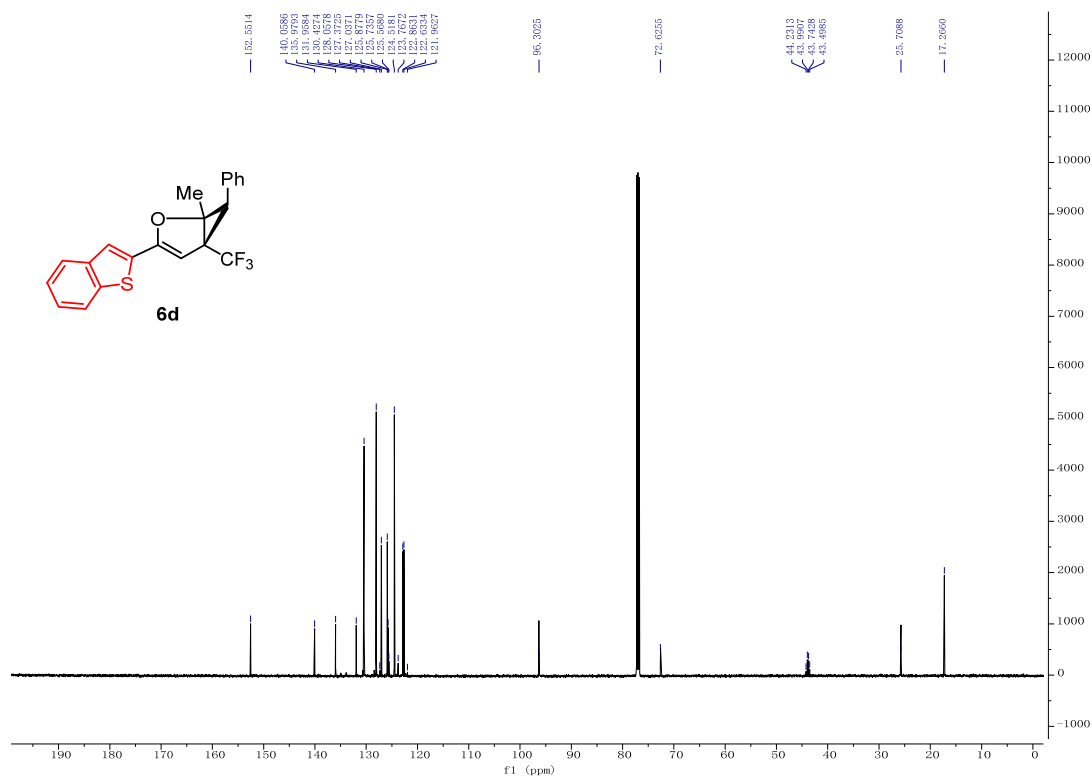

$^{19}\text{F}$  NMR (565 MHz,  $\text{CDCl}_3$ ) of compound **6d**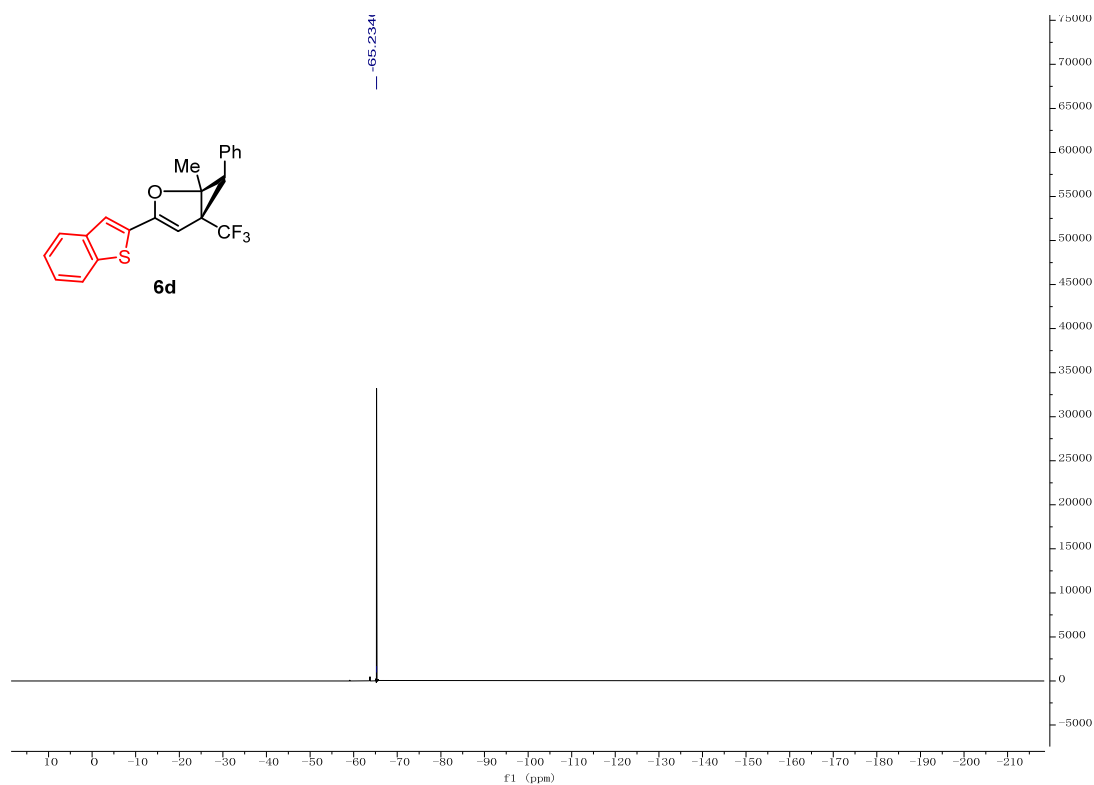 $^1\text{H}$  NMR (600 MHz,  $\text{CDCl}_3$ ) of compound **6e**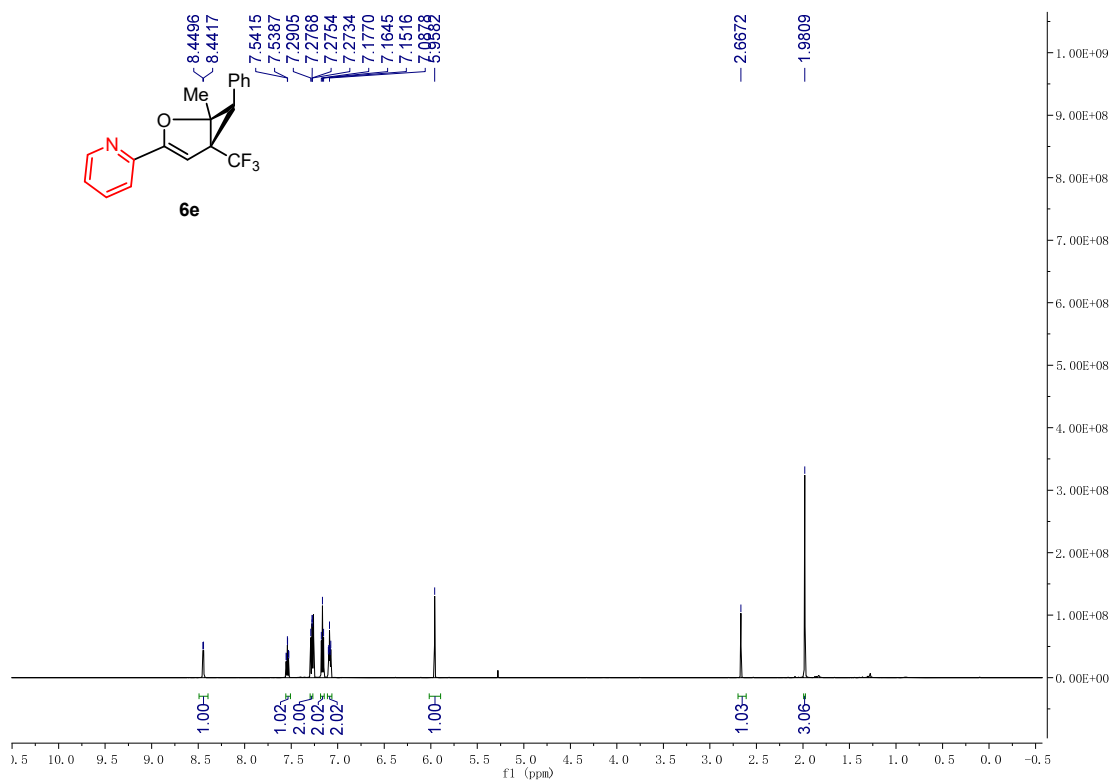

$^{13}\text{C}$  NMR (151 MHz,  $\text{CDCl}_3$ ) of compound **6e**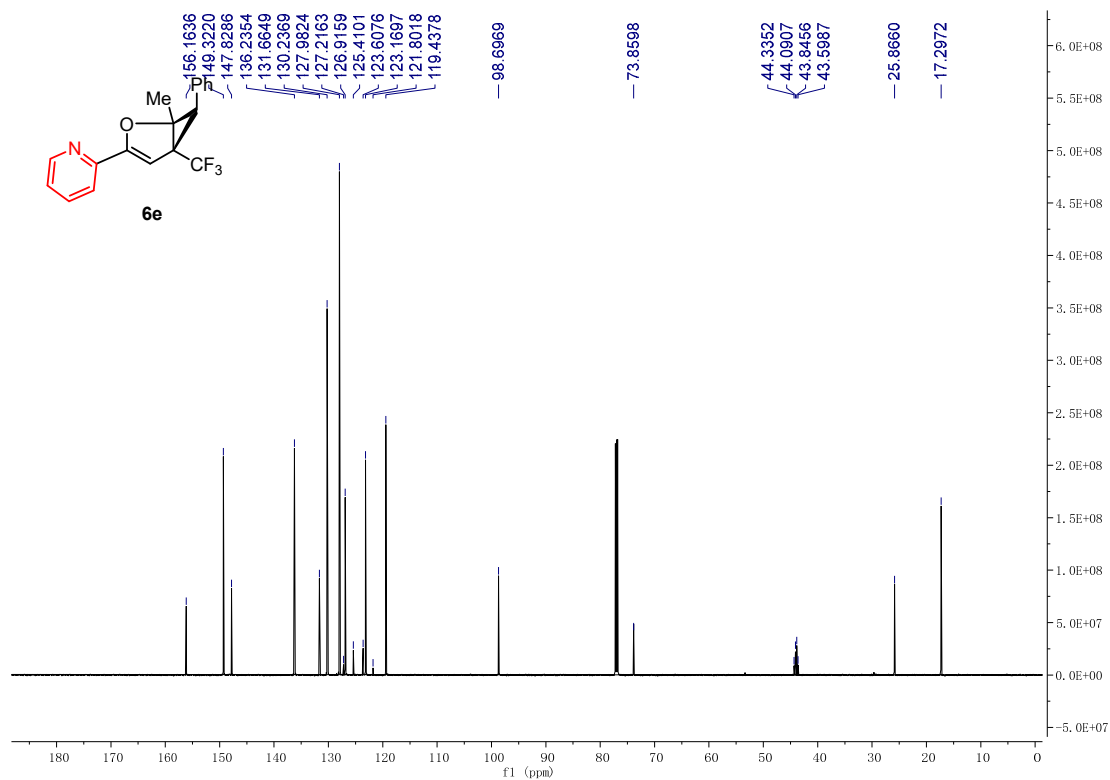 $^{19}\text{F}$  NMR (565 MHz,  $\text{CDCl}_3$ ) of compound **6e**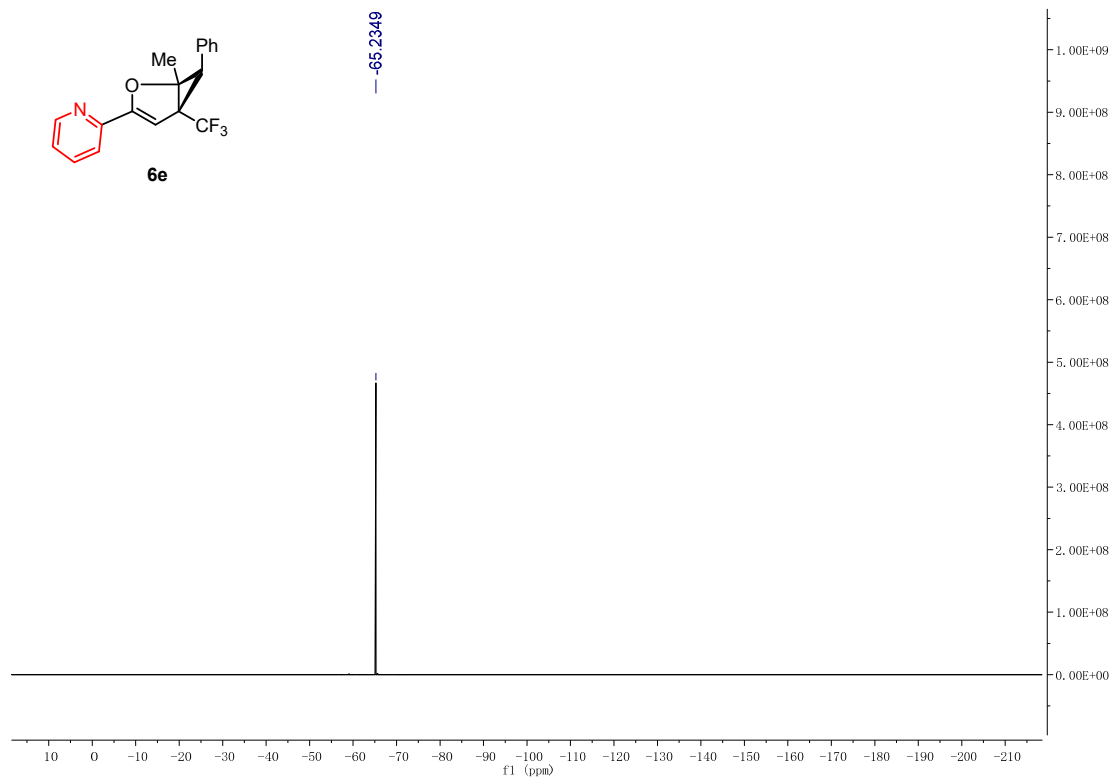

$^1\text{H}$  NMR (600 MHz,  $\text{CDCl}_3$ ) of compound **6f**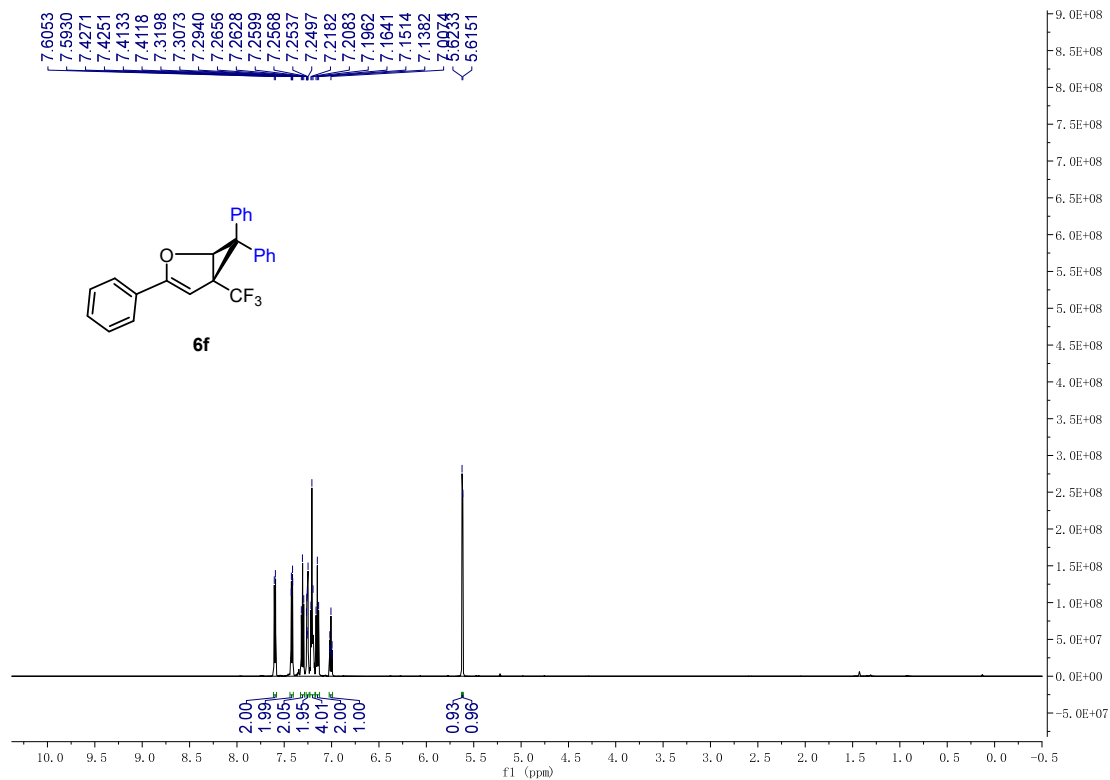 $^{13}\text{C}$  NMR (151 MHz,  $\text{CDCl}_3$ ) of compound **6f**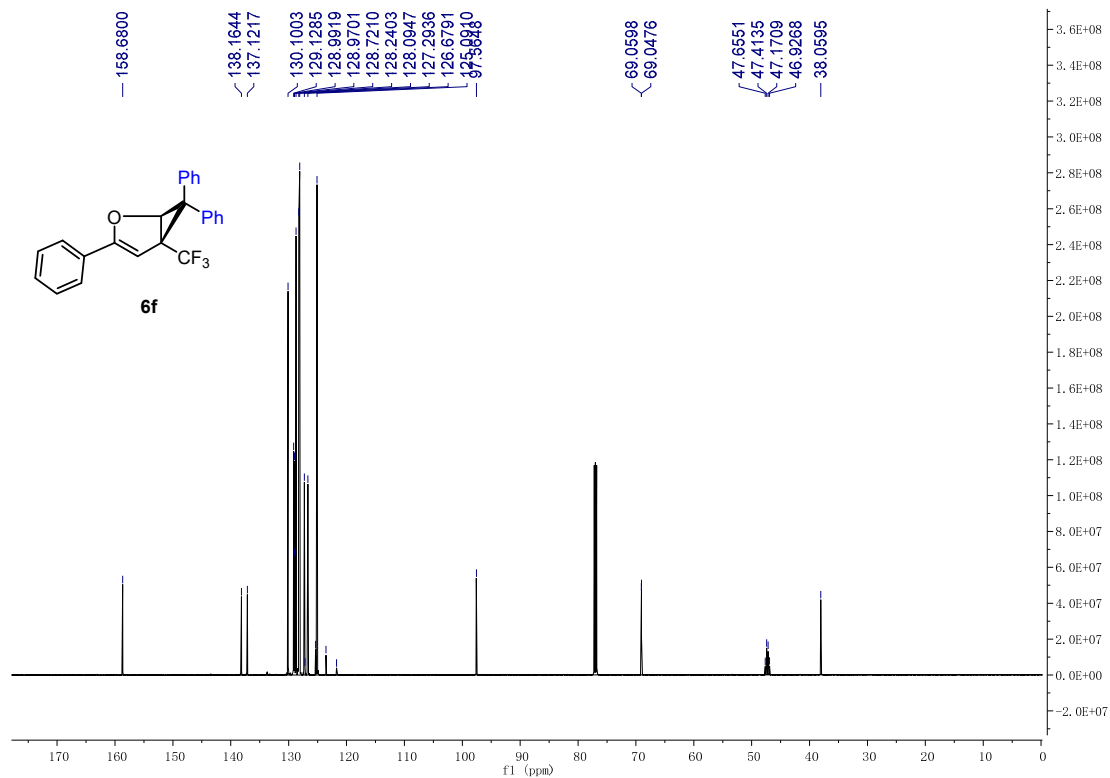

$^{19}\text{F}$  NMR (565 MHz,  $\text{CDCl}_3$ ) of compound **6f**

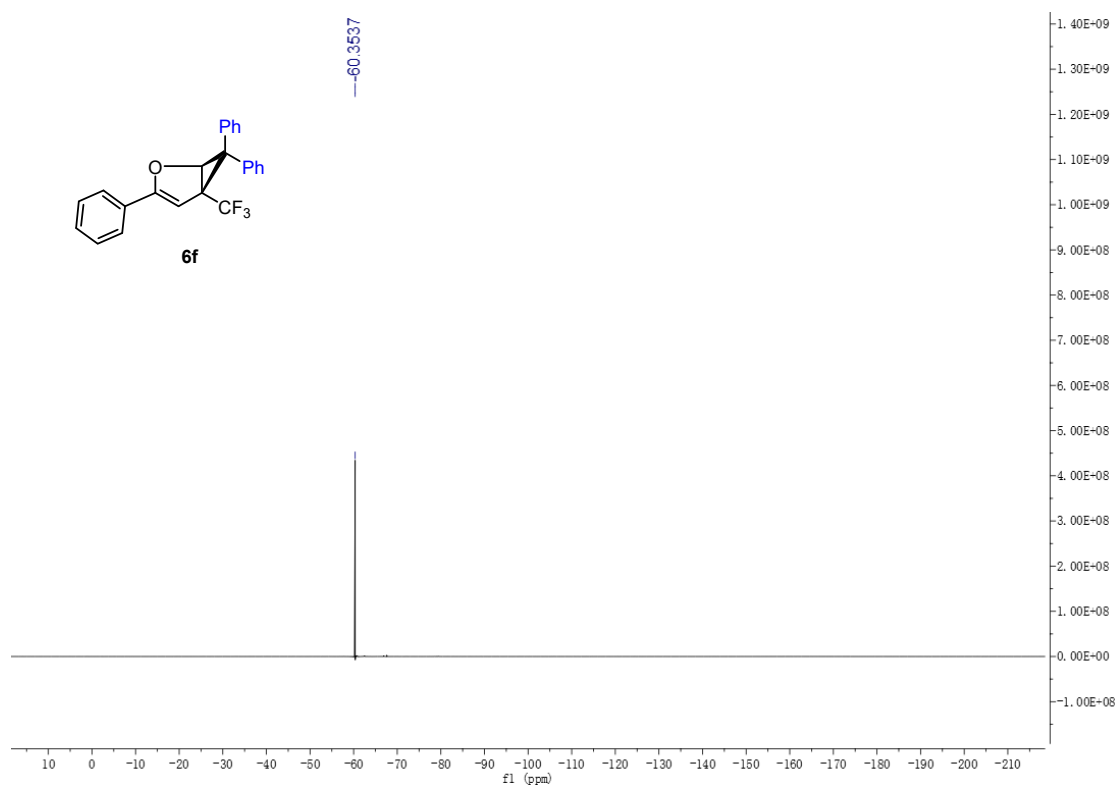

## 12. References

1. M. J. Frisch, G. W. Trucks, H. B. Schlegel, G. E. Scuseria, M. A. Robb, J. R. Cheeseman, G. Scalmani, V. Barone, G. A. Petersson, H. Nakatsuji, X. Li, M. Caricato, A. V. Marenich, J. Bloino, B. G. Janesko, R. Gomperts, B. Mennucci, H. P. Hratchian, J. V. Ortiz, A. F. Izmaylov, J. L. Sonnenberg, Williams, F. Ding, F. Lipparini, F. Egidi, J. Goings, B. Peng, A. Petrone, T. Henderson, D. Ranasinghe, V. G. Zakrzewski, J. Gao, N. Rega, G. Zheng, W. Liang, M. Hada, M. Ehara, K. Toyota, R. Fukuda, J. Hasegawa, M. Ishida, T. Nakajima, Y. Honda, O. Kitao, H. Nakai, T. Vreven, K. Throssell, J. A. Montgomery Jr., J. E. Peralta, F. Ogliaro, M. J. Bearpark, J. J. Heyd, E. N. Brothers, K. N. Kudin, V. N. Staroverov, T. A. Keith, R. Kobayashi, J. Normand, K. Raghavachari, A. P. Rendell, J. C. Burant, S. S. Iyengar, J. Tomasi, M. Cossi, J. M. Millam, M. Klene, C. Adamo, R. Cammi, J. W. Ochterski, R. L. Martin, K. Morokuma, O. Farkas, J. B. Foresman, D. J. Fox, *Gaussian 16, Revision B.01*; Gaussian, Inc.: Wallingford, CT, 2016.
2. Y. Zhao and D. G. Truhlar, *Theor. Chem. Acc.*, 2008, **120**, 215–241.
3. A. D. Becke, *Phys. Rev. A*, 1988, **38**, 3098-3100.
4. A. D. Becke, *J. Chem. Phys.*, 1993, **98**, 5648-5652.
5. C. Lee, W. Yang and R. G. Parr, *Phys. Rev. B*, 1988, **37**, 785-789.
6. A. V. Marenich, C. J. Cramer and D. G. Truhlar, *J. Phys. Chem. B*, 2009, **113**, 4538–4543.
7. K. Fukui, *Acc. Chem. Res.*, 1981, **14**, 363–368.
8. C. Gonzalez and B. Schlegel, *J. Chem. Phys.*, 1989, **90**, 2154–2161.
9. C. Y. Legault, CYLview, 1.0b; Université de Sherbrooke: Canada, 2009. Available at: <http://www.cylview.org> (accessed September, 2014).
10. E. Li, J. Chen and Y. Huang, *Angew. Chem. Int. Ed.*, 2022, **61**, e202202040.
11. M. Trost and L. Debien, *J. Am. Chem. Soc.*, 2015, **137**, 11606–11609.
12. Z. C. Litman, Y. Wang, H. Zhao and J. F. Hartwig, *Nature*, 2018, **560**, 355–359.
13. B. B. C. Peters, J. Jongcharoenkamol, S. Krajangsri and P. G. Andersson, *Org. Lett.*, 2020, **23**, 242–246.
14. M. R. Kalbagh, D. Karuturi, S. Kulala, M. Montgomery, P. Kamath and M. Lal, *Synth. Commun.*, 2020, **50**, 3062–3071.
15. K. Matoba, H. Kawai, T. Furukawa, A. Kusuda, E. Tokunaga, S. Nakamura, M. Shiro and N. Shibata, *Angew. Chem. Int. Ed.*, 2010, **49**, 5762-5766.
16. X. Wu, F. Xie, I. D. Gridnev and W. Zhang, *Org. Lett.*, 2018, **20**, 1638–1642.
